# Supplementary material
Source: publisher figshare collection journal article supplement (https://acs.figshare.com/ndownloader/files/3778246)
Supplement: Supplementary file 1 [file 3778246]

data_mo_nv008_0m
_audit_creation_date              2015-02-05
_audit_creation_method
;
Olex2 1.2
(compiled 2015.01.26 svn.r3150 for OlexSys, GUI svn.r4998)
;
_shelxl_version_number            2013-4
_publ_contact_author_address      ?
_publ_contact_author_email        ?
_publ_contact_author_name         ''
_publ_contact_author_phone        ?
_publ_section_references
;
Dolomanov, O.V., Bourhis, L.J., Gildea, R.J, Howard, J.A.K. & Puschmann, H.
 (2009), J. Appl. Cryst. 42, 339-341.

Sheldrick, G.M. (2008). Acta Cryst. A64, 112-122.
;
_chemical_name_common             ?
_chemical_name_systematic
;
 ?
;
_chemical_formula_moiety          'C25 H29 N O8, C22 H36 O6'
_chemical_formula_sum             'C47 H65 N O14'
_chemical_formula_weight          868.00
_chemical_melting_point           ?
loop_
  _atom_type_symbol
  _atom_type_description
  _atom_type_scat_dispersion_real
  _atom_type_scat_dispersion_imag
  _atom_type_scat_source
 'C' 'C' 0.0033 0.0016 'International Tables Vol C Tables 4.2.6.8 and 6.1.1.4'
 'H' 'H' 0.0000 0.0000 'International Tables Vol C Tables 4.2.6.8 and 6.1.1.4'
 'N' 'N' 0.0061 0.0033 'International Tables Vol C Tables 4.2.6.8 and 6.1.1.4'
 'O' 'O' 0.0106 0.0060 'International Tables Vol C Tables 4.2.6.8 and 6.1.1.4'

_shelx_space_group_comment
;
The symmetry employed for this shelxl refinement is uniquely defined
by the following loop, which should always be used as a source of
symmetry information in preference to the above space-group names.
They are only intended as comments.
;
_space_group_crystal_system       'monoclinic'
_space_group_IT_number            14
_space_group_name_H-M_alt         'P 1 21/c 1'
_space_group_name_Hall            '-P 2ybc'
loop_
  _space_group_symop_operation_xyz
 'x, y, z'
 '-x, y+1/2, -z+1/2'
 '-x, -y, -z'
 'x, -y-1/2, z-1/2'

_cell_length_a                    15.8754(12)
_cell_length_b                    34.211(3)
_cell_length_c                    18.0716(15)
_cell_angle_alpha                 90
_cell_angle_beta                  108.2190(18)
_cell_angle_gamma                 90
_cell_volume                      9323.0(13)
_cell_formula_units_Z             8
_cell_measurement_reflns_used     9627
_cell_measurement_temperature     173(2)
_cell_measurement_theta_max       24.172
_cell_measurement_theta_min       3.046
_shelx_estimated_absorpt_T_max    ?
_shelx_estimated_absorpt_T_min    ?
_exptl_absorpt_coefficient_mu     0.091
_exptl_absorpt_correction_T_max   0.7451
_exptl_absorpt_correction_T_min   0.6601
_exptl_absorpt_correction_type    multi-scan
_exptl_absorpt_process_details    
;
SADABS-2012/1 (Bruker,2012)
wR2(int)was 0.0720 before and 0.0672 after correction.
The Ratio of minimum to maximum transmission is 0.8859.
The \l/2 correction factor is 0.0015.
;
_exptl_crystal_colour             colorless
_exptl_crystal_density_diffrn     1.237
_exptl_crystal_density_meas       ?
_exptl_crystal_density_method     ?
_exptl_crystal_description        block
_exptl_crystal_F_000              3728
_exptl_crystal_size_max           0.34
_exptl_crystal_size_mid           0.28
_exptl_crystal_size_min           0.20
_exptl_special_details
;
 ?
;
_exptl_transmission_factor_max    ?
_exptl_transmission_factor_min    ?
_diffrn_reflns_av_R_equivalents   0.0706
_diffrn_reflns_av_unetI/netI      0.0401
_diffrn_reflns_Laue_measured_fraction_full 0.718
_diffrn_reflns_Laue_measured_fraction_max 0.997
_diffrn_reflns_limit_h_max        16
_diffrn_reflns_limit_h_min        -17
_diffrn_reflns_limit_k_max        36
_diffrn_reflns_limit_k_min        -36
_diffrn_reflns_limit_l_max        19
_diffrn_reflns_limit_l_min        -19
_diffrn_reflns_number             151091
_diffrn_reflns_point_group_measured_fraction_full 0.718
_diffrn_reflns_point_group_measured_fraction_max 0.997
_diffrn_reflns_theta_full         25.242
_diffrn_reflns_theta_max          22.465
_diffrn_reflns_theta_min          2.940
_diffrn_ambient_temperature       173.06
_diffrn_detector_area_resol_mean  ?
_diffrn_measured_fraction_theta_full 0.718
_diffrn_measured_fraction_theta_max 0.997
_diffrn_measurement_device_type   ?
_diffrn_measurement_method        '\f and \w scans'
_diffrn_radiation_type            MoK\a
_diffrn_radiation_wavelength      0.71073
_diffrn_source                    ?
_diffrn_standards_number          0
_reflns_Friedel_coverage          0.000
_reflns_Friedel_fraction_full     .
_reflns_Friedel_fraction_max      .
_reflns_number_gt                 8559
_reflns_number_total              12110
_reflns_special_details
;
 Reflections were merged by SHELXL according to the crystal
 class for the calculation of statistics and refinement.
 
 _reflns_Friedel_fraction is defined as the number of unique
 Friedel pairs measured divided by the number that would be
 possible theoretically, ignoring centric projections and
 systematic absences.
;
_reflns_threshold_expression      'I > 2\s(I)'
_computing_cell_refinement        'SAINT v8.34A (Bruker, 2013)'
_computing_data_collection        ?
_computing_data_reduction         'SAINT v8.34A (Bruker, 2013)'
_computing_molecular_graphics     'Olex2 (Dolomanov et al., 2009)'
_computing_publication_material   'Olex2 (Dolomanov et al., 2009)'
_computing_structure_refinement   'XL (Sheldrick, 2008)'
_computing_structure_solution     'XS (Sheldrick, 2008)'
_refine_diff_density_max          0.566
_refine_diff_density_min          -0.301
_refine_diff_density_rms          0.056
_refine_ls_extinction_coef        .
_refine_ls_extinction_method      none
_refine_ls_goodness_of_fit_ref    1.117
_refine_ls_hydrogen_treatment     constr
_refine_ls_matrix_type            full
_refine_ls_number_parameters      1238
_refine_ls_number_reflns          12110
_refine_ls_number_restraints      258
_refine_ls_R_factor_all           0.1517
_refine_ls_R_factor_gt            0.1113
_refine_ls_restrained_S_all       1.107
_refine_ls_shift/su_max           0.000
_refine_ls_shift/su_mean          0.000
_refine_ls_structure_factor_coef  Fsqd
_refine_ls_weighting_details
'w=1/[\s^2^(Fo^2^)+(0.0177P)^2^+39.4543P] where P=(Fo^2^+2Fc^2^)/3'
_refine_ls_weighting_scheme       calc
_refine_ls_wR_factor_gt           0.2089
_refine_ls_wR_factor_ref          0.2348
_refine_special_details
;
 ?
;
_olex2_refinement_description
;
1. Fixed Uiso
 At 1.2 times of:
  All C(H) groups, All C(H,H) groups, All N(H) groups
 At 1.5 times of:
  All C(H,H,H) groups
2. Uiso/Uaniso restraints and constraints
O109 \\sim O110 \\sim O111 \\sim O112 \\sim O113 \\sim O114 \\sim C126 \\sim
C127 \\sim C128 \\sim C129 \\sim C130 \\sim C131 \\sim C132 \\sim C133 \\sim
C134 \\sim C135 \\sim C136 \\sim C137 \\sim C138 \\sim C139 \\sim C140 \\sim
C141 \\sim C142 \\sim C143 \\sim C144 \\sim C145 \\sim C146 \\sim C147: within
1.7A with sigma of 0.04 and sigma for terminal atoms of 0.08
O209 \\sim O210 \\sim O211 \\sim O212 \\sim O213 \\sim O214 \\sim C226 \\sim
C227 \\sim C228 \\sim C229 \\sim C230 \\sim C231 \\sim C232 \\sim C233 \\sim
C234 \\sim C235 \\sim C236 \\sim C237 \\sim C238 \\sim C239 \\sim C240 \\sim
C241 \\sim C242 \\sim C243 \\sim C244 \\sim C245 \\sim C246 \\sim C247: within
1.7A with sigma of 0.04 and sigma for terminal atoms of 0.08
C113 \\sim N101 \\sim C106 \\sim C107 \\sim C108 \\sim C109 \\sim C104 \\sim
C105: within 1.7A with sigma of 0.04 and sigma for terminal atoms of 0.08
N201 \\sim C213 \\sim C214 \\sim C215 \\sim C216 \\sim C217 \\sim C218 \\sim
C219: within 1.7A with sigma of 0.04 and sigma for terminal atoms of 0.08
3. Others
 Sof(N201)=Sof(H201)=Sof(C213)=Sof(H21A)=Sof(H21B)=Sof(C214)=Sof(C215)=
 Sof(H215)=Sof(C216)=Sof(C217)=Sof(H217)=Sof(C218)=Sof(C219)=Sof(H219)=
 Sof(O209)=Sof(O210)=Sof(O211)=Sof(O212)=Sof(O213)=Sof(O214)=Sof(C226)=
 Sof(H22A)=Sof(H22B)=Sof(C227)=Sof(H22C)=Sof(H22D)=Sof(C228)=Sof(H22E)=
 Sof(H22F)=Sof(C229)=Sof(H22G)=Sof(H22H)=Sof(C230)=Sof(C231)=Sof(H231)=
 Sof(C232)=Sof(H232)=Sof(C233)=Sof(H233)=Sof(C234)=Sof(H234)=Sof(C235)=
 Sof(C236)=Sof(H23A)=Sof(H23B)=Sof(C237)=Sof(H23C)=Sof(H23D)=Sof(C238)=
 Sof(H23E)=Sof(H23F)=Sof(C239)=Sof(H23G)=Sof(H23H)=Sof(C240)=Sof(H24A)=
 Sof(H24B)=Sof(C241)=Sof(H24C)=Sof(H24D)=Sof(C242)=Sof(H24E)=Sof(H24F)=
 Sof(C243)=Sof(H24G)=Sof(H24H)=Sof(C244)=Sof(H24I)=Sof(H24J)=Sof(C245)=
 Sof(H24K)=Sof(H24L)=Sof(C246)=Sof(H24M)=Sof(H24N)=Sof(C247)=Sof(H24O)=
 Sof(H24P)=1-FVAR(1)
 Sof(C113)=Sof(H11F)=Sof(H11G)=Sof(N101)=Sof(H101)=Sof(C104)=Sof(C105)=
 Sof(H105)=Sof(C106)=Sof(C107)=Sof(H107)=Sof(C108)=Sof(C109)=Sof(H109)=
 Sof(O109)=Sof(O110)=Sof(O111)=Sof(O112)=Sof(O113)=Sof(O114)=Sof(C126)=
 Sof(H12K)=Sof(H12L)=Sof(C127)=Sof(H12M)=Sof(H12N)=Sof(C128)=Sof(H12O)=
 Sof(H12P)=Sof(C129)=Sof(H12Q)=Sof(H12R)=Sof(C130)=Sof(C131)=Sof(H131)=
 Sof(C132)=Sof(H132)=Sof(C133)=Sof(H133)=Sof(C134)=Sof(H134)=Sof(C135)=
 Sof(C136)=Sof(H13A)=Sof(H13B)=Sof(C137)=Sof(H13C)=Sof(H13D)=Sof(C138)=
 Sof(H13E)=Sof(H13F)=Sof(C139)=Sof(H13G)=Sof(H13H)=Sof(C140)=Sof(H14A)=
 Sof(H14B)=Sof(C141)=Sof(H14C)=Sof(H14D)=Sof(C142)=Sof(H14E)=Sof(H14F)=
 Sof(C143)=Sof(H14G)=Sof(H14H)=Sof(C144)=Sof(H14I)=Sof(H14J)=Sof(C145)=
 Sof(H14K)=Sof(H14L)=Sof(C146)=Sof(H14M)=Sof(H14N)=Sof(C147)=Sof(H14O)=
 Sof(H14P)=FVAR(1)
4.a Secondary CH2 refined with riding coordinates:
 C2(H2A,H2B), C11(H11H,H11I), C13(H13I,H13J), C21(H21C,H21D), C24(H24Q,H24R),
 C26(H26A,H26B), C27(H27A,H27B), C28(H28A,H28B), C29(H29A,H29B), C36(H36A,H36B),
  C37(H37A,H37B), C38(H38A,H38B), C39(H39A,H39B), C40(H40A,H40B), C41(H41A,
 H41B), C42(H42A,H42B), C43(H43A,H43B), C44(H44A,H44B), C45(H45A,H45B),
 C46(H46A,H46B), C47(H47A,H47B), C102(H10D,H10E), C111(H11A,H11B), C121(H12A,
 H12B), C124(H12F,H12G), C113(H11F,H11G), C126(H12K,H12L), C127(H12M,H12N),
 C128(H12O,H12P), C129(H12Q,H12R), C136(H13A,H13B), C137(H13C,H13D), C138(H13E,
 H13F), C139(H13G,H13H), C140(H14A,H14B), C141(H14C,H14D), C142(H14E,H14F),
 C143(H14G,H14H), C144(H14I,H14J), C145(H14K,H14L), C146(H14M,H14N), C147(H14O,
 H14P), C213(H21A,H21B), C226(H22A,H22B), C227(H22C,H22D), C228(H22E,H22F),
 C229(H22G,H22H), C236(H23A,H23B), C237(H23C,H23D), C238(H23E,H23F), C239(H23G,
 H23H), C240(H24A,H24B), C241(H24C,H24D), C242(H24E,H24F), C243(H24G,H24H),
 C244(H24I,H24J), C245(H24K,H24L), C246(H24M,H24N), C247(H24O,H24P)
4.b Me refined with riding coordinates:
 C1(H1A,H1B,H1C), C12(H12S,H12T,H12U), C22(H22I,H22J,H22K), C25(H25A,H25B,
 H25C), C101(H10A,H10B,H10C), C112(H11C,H11D,H11E), C122(H12C,H12D,H12E),
 C125(H12H,H12I,H12J)
4.c Aromatic/amide H refined with riding coordinates:
 N1(H1), C5(H5), C7(H7), C9(H9), C15(H15), C17(H17), C19(H19), C31(H31),
 C32(H32), C33(H33), C34(H34), C115(H115), C117(H117), C119(H119), N101(H101),
 C105(H105), C107(H107), C109(H109), C131(H131), C132(H132), C133(H133),
 C134(H134), N201(H201), C215(H215), C217(H217), C219(H219), C231(H231),
 C232(H232), C233(H233), C234(H234)
4.d Fitted hexagon refined as free rotating group:
 C214(C215,C216,C217,C218,C219), C230(C231,C232,C233,C234,C235)
;
_atom_sites_solution_hydrogens    geom
_atom_sites_solution_primary      direct
_atom_sites_solution_secondary    ?
loop_
  _atom_site_label
  _atom_site_type_symbol
  _atom_site_fract_x
  _atom_site_fract_y
  _atom_site_fract_z
  _atom_site_U_iso_or_equiv
  _atom_site_adp_type
  _atom_site_occupancy
  _atom_site_site_symmetry_order
  _atom_site_calc_flag
  _atom_site_refinement_flags_posn
  _atom_site_refinement_flags_adp
  _atom_site_refinement_flags_occupancy
  _atom_site_disorder_assembly
  _atom_site_disorder_group
 O1 O 0.5885(3) -0.12040(14) 0.3064(3) 0.0800(15) Uani 1 1 d . . . . .
 O2 O 0.6486(4) -0.07218(15) 0.2571(3) 0.0838(16) Uani 1 1 d . . . . .
 O3 O 0.2221(4) -0.05484(17) 0.3028(4) 0.106(2) Uani 1 1 d . . . . .
 O4 O 0.2990(4) -0.10939(19) 0.3409(4) 0.112(2) Uani 1 1 d . . . . .
 O5 O 0.4592(5) 0.17001(17) 0.0300(3) 0.114(2) Uani 1 1 d . . . . .
 O6 O 0.4464(5) 0.22531(17) 0.0897(4) 0.118(2) Uani 1 1 d . . . . .
 O7 O 0.5325(6) 0.1601(2) 0.4347(4) 0.136(3) Uani 1 1 d . . . . .
 O8 O 0.5145(6) 0.2190(2) 0.3788(4) 0.133(3) Uani 1 1 d . . . . .
 N1 N 0.4275(3) 0.04025(15) 0.2446(3) 0.0606(15) Uani 1 1 d . . . . .
 H1 H 0.3838 0.0538 0.2522 0.073 Uiso 1 1 calc R . . . .
 C1 C 0.6626(9) -0.1778(4) 0.3613(9) 0.218(8) Uani 1 1 d . . . . .
 H1A H 0.7152 -0.1941 0.3686 0.326 Uiso 1 1 calc R . . . .
 H1B H 0.6094 -0.1928 0.3341 0.326 Uiso 1 1 calc R . . . .
 H1C H 0.6593 -0.1694 0.4122 0.326 Uiso 1 1 calc R . . . .
 C2 C 0.6683(6) -0.1443(2) 0.3162(6) 0.097(3) Uani 1 1 d . . . . .
 H2A H 0.6719 -0.1524 0.2648 0.117 Uiso 1 1 calc R . . . .
 H2B H 0.7221 -0.1290 0.3432 0.117 Uiso 1 1 calc R . . . .
 C3 C 0.5896(5) -0.0844(2) 0.2778(4) 0.0600(18) Uani 1 1 d . . . . .
 C4 C 0.5086(4) -0.06230(18) 0.2756(4) 0.0520(16) Uani 1 1 d . . . . .
 C5 C 0.5042(4) -0.02284(19) 0.2559(4) 0.0556(17) Uani 1 1 d . . . . .
 H5 H 0.5517 -0.0112 0.2423 0.067 Uiso 1 1 calc R . . . .
 C6 C 0.4310(4) -0.00007(18) 0.2559(4) 0.0541(17) Uani 1 1 d . . . . .
 C7 C 0.3607(4) -0.01812(19) 0.2722(4) 0.0565(17) Uani 1 1 d . . . . .
 H7 H 0.3092 -0.0034 0.2698 0.068 Uiso 1 1 calc R . . . .
 C8 C 0.3646(5) -0.0570(2) 0.2918(4) 0.0610(18) Uani 1 1 d . . . . .
 C9 C 0.4388(5) -0.07917(19) 0.2934(4) 0.0590(18) Uani 1 1 d . . . . .
 H9 H 0.4412 -0.1061 0.3069 0.071 Uiso 1 1 calc R . . . .
 C10 C 0.2938(6) -0.0774(3) 0.3144(5) 0.078(2) Uani 1 1 d . . . . .
 C11 C 0.1473(8) -0.0718(3) 0.3235(8) 0.153(5) Uani 1 1 d . . . . .
 H11H H 0.1099 -0.0872 0.2789 0.184 Uiso 1 1 calc R . . . .
 H11I H 0.1705 -0.0898 0.3682 0.184 Uiso 1 1 calc R . . . .
 C12 C 0.1001(8) -0.0457(5) 0.3412(10) 0.216(8) Uani 1 1 d . . . . .
 H12S H 0.0513 -0.0581 0.3548 0.324 Uiso 1 1 calc R . . . .
 H12T H 0.0758 -0.0282 0.2967 0.324 Uiso 1 1 calc R . . . .
 H12U H 0.1366 -0.0306 0.3858 0.324 Uiso 1 1 calc R . . . .
 C13 C 0.4931(4) 0.05952(19) 0.2213(4) 0.0624(19) Uani 1 1 d . . . . .
 H13I H 0.4876 0.0518 0.1672 0.075 Uiso 1 1 calc R . . . .
 H13J H 0.5522 0.0510 0.2552 0.075 Uiso 1 1 calc R . . . .
 C14 C 0.4869(4) 0.10358(17) 0.2253(4) 0.0465(15) Uani 1 1 d . . . . .
 C15 C 0.4706(4) 0.12557(18) 0.1586(4) 0.0512(16) Uani 1 1 d . . . . .
 H15 H 0.4605 0.1129 0.1098 0.061 Uiso 1 1 calc R . . . .
 C16 C 0.4688(4) 0.16633(18) 0.1616(4) 0.0493(16) Uani 1 1 d . . . . .
 C17 C 0.4821(4) 0.18454(19) 0.2311(4) 0.0562(18) Uani 1 1 d . . . . .
 H17 H 0.4797 0.2123 0.2329 0.067 Uiso 1 1 calc R . . . .
 C18 C 0.4993(4) 0.1633(2) 0.2990(4) 0.0556(17) Uani 1 1 d . . . . .
 C19 C 0.5017(4) 0.1229(2) 0.2954(4) 0.0562(18) Uani 1 1 d . . . . .
 H19 H 0.5138 0.1081 0.3420 0.067 Uiso 1 1 calc R . . . .
 C20 C 0.4564(5) 0.1908(2) 0.0909(5) 0.076(2) Uani 1 1 d . . . . .
 C21 C 0.4625(8) 0.1928(3) -0.0423(6) 0.131(4) Uani 1 1 d . . . . .
 H21C H 0.4574 0.2213 -0.0351 0.157 Uiso 1 1 calc R . . . .
 H21D H 0.5180 0.1874 -0.0544 0.157 Uiso 1 1 calc R . . . .
 C22 C 0.3897(8) 0.1787(3) -0.0998(6) 0.139(4) Uani 1 1 d . . . . .
 H22I H 0.3854 0.1916 -0.1493 0.208 Uiso 1 1 calc R . . . .
 H22J H 0.3360 0.1840 -0.0858 0.208 Uiso 1 1 calc R . . . .
 H22K H 0.3961 0.1505 -0.1053 0.208 Uiso 1 1 calc R . . . .
 C23 C 0.5165(7) 0.1839(3) 0.3739(6) 0.096(3) Uani 1 1 d . . . . .
 C24 C 0.5417(14) 0.1761(5) 0.5212(12) 0.234(12) Uani 1 1 d . . . . .
 H24Q H 0.5019 0.1985 0.5208 0.281 Uiso 1 1 calc R . . . .
 H24R H 0.5336 0.1554 0.5566 0.281 Uiso 1 1 calc R . . . .
 C25 C 0.6189(17) 0.1858(5) 0.5349(10) 0.272(15) Uani 1 1 d . . . . .
 H25A H 0.6407 0.1971 0.5873 0.407 Uiso 1 1 calc R . . . .
 H25B H 0.6235 0.2053 0.4966 0.407 Uiso 1 1 calc R . . . .
 H25C H 0.6546 0.1629 0.5319 0.407 Uiso 1 1 calc R . . . .
 O9 O 0.6054(3) 0.04000(15) 0.4177(3) 0.0734(14) Uani 1 1 d . . . . .
 O10 O 0.7089(3) 0.04455(13) 0.3078(2) 0.0564(11) Uani 1 1 d . . . . .
 O11 O 0.6441(2) 0.05695(12) 0.1359(2) 0.0505(11) Uani 1 1 d . . . . .
 O12 O 0.4891(3) 0.04879(12) 0.0315(2) 0.0549(11) Uani 1 1 d . . . . .
 O13 O 0.3057(3) 0.04534(12) 0.0473(3) 0.0652(13) Uani 1 1 d . . . . .
 O14 O 0.2401(3) 0.06679(14) 0.1794(3) 0.0713(14) Uani 1 1 d . . . . .
 C26 C 0.6991(5) 0.0427(2) 0.4377(4) 0.079(2) Uani 1 1 d . . . . .
 H26A H 0.7271 0.0305 0.4893 0.095 Uiso 1 1 calc R . . . .
 H26B H 0.7172 0.0705 0.4408 0.095 Uiso 1 1 calc R . . . .
 C27 C 0.7287(5) 0.0224(2) 0.3781(4) 0.069(2) Uani 1 1 d . . . . .
 H27A H 0.7935 0.0179 0.3986 0.083 Uiso 1 1 calc R . . . .
 H27B H 0.6992 -0.0034 0.3668 0.083 Uiso 1 1 calc R . . . .
 C28 C 0.7386(4) 0.02561(18) 0.2517(3) 0.0480(16) Uani 1 1 d . . . . .
 H28A H 0.7014 0.0023 0.2321 0.058 Uiso 1 1 calc R . . . .
 H28B H 0.8005 0.0168 0.2759 0.058 Uiso 1 1 calc R . . . .
 C29 C 0.7341(4) 0.05236(18) 0.1852(3) 0.0482(16) Uani 1 1 d . . . . .
 H29A H 0.7588 0.0782 0.2056 0.058 Uiso 1 1 calc R . . . .
 H29B H 0.7705 0.0416 0.1544 0.058 Uiso 1 1 calc R . . . .
 C30 C 0.6334(4) 0.07480(17) 0.0653(3) 0.0472(15) Uani 1 1 d . . . . .
 C31 C 0.6974(5) 0.0960(2) 0.0481(4) 0.0600(18) Uani 1 1 d . . . . .
 H31 H 0.7529 0.1004 0.0868 0.072 Uiso 1 1 calc R . . . .
 C32 C 0.6813(6) 0.1113(2) -0.0266(5) 0.077(2) Uani 1 1 d . . . . .
 H32 H 0.7256 0.1266 -0.0382 0.092 Uiso 1 1 calc R . . . .
 C33 C 0.6025(7) 0.1047(3) -0.0832(5) 0.085(3) Uani 1 1 d . . . . .
 H33 H 0.5932 0.1141 -0.1346 0.102 Uiso 1 1 calc R . . . .
 C34 C 0.5359(5) 0.0840(2) -0.0651(4) 0.066(2) Uani 1 1 d . . . . .
 H34 H 0.4804 0.0800 -0.1040 0.080 Uiso 1 1 calc R . . . .
 C35 C 0.5500(4) 0.06931(18) 0.0090(3) 0.0493(16) Uani 1 1 d . . . . .
 C36 C 0.4050(4) 0.0404(2) -0.0271(4) 0.068(2) Uani 1 1 d . . . . .
 H36A H 0.4149 0.0242 -0.0689 0.081 Uiso 1 1 calc R . . . .
 H36B H 0.3765 0.0652 -0.0506 0.081 Uiso 1 1 calc R . . . .
 C37 C 0.3466(5) 0.0195(2) 0.0091(4) 0.071(2) Uani 1 1 d . . . . .
 H37A H 0.3006 0.0051 -0.0316 0.086 Uiso 1 1 calc R . . . .
 H37B H 0.3819 0.0001 0.0470 0.086 Uiso 1 1 calc R . . . .
 C38 C 0.2402(5) 0.0253(2) 0.0720(5) 0.084(3) Uani 1 1 d . . . . .
 H38A H 0.2693 0.0052 0.1112 0.100 Uiso 1 1 calc R . . . .
 H38B H 0.1983 0.0118 0.0269 0.100 Uiso 1 1 calc R . . . .
 C39 C 0.1902(5) 0.0531(2) 0.1066(5) 0.082(2) Uani 1 1 d . . . . .
 H39A H 0.1704 0.0756 0.0710 0.098 Uiso 1 1 calc R . . . .
 H39B H 0.1366 0.0399 0.1112 0.098 Uiso 1 1 calc R . . . .
 C40 C 0.1895(5) 0.0929(3) 0.2122(6) 0.094(3) Uani 1 1 d . . . . .
 H40A H 0.1368 0.0789 0.2169 0.113 Uiso 1 1 calc R . . . .
 H40B H 0.1685 0.1153 0.1767 0.113 Uiso 1 1 calc R . . . .
 C41 C 0.2428(6) 0.1073(3) 0.2896(6) 0.099(3) Uani 1 1 d . . . . .
 H41A H 0.2993 0.1179 0.2858 0.119 Uiso 1 1 calc R . . . .
 H41B H 0.2105 0.1292 0.3046 0.119 Uiso 1 1 calc R . . . .
 C42 C 0.2628(5) 0.0776(2) 0.3515(6) 0.089(3) Uani 1 1 d . . . . .
 H42A H 0.3054 0.0585 0.3423 0.107 Uiso 1 1 calc R . . . .
 H42B H 0.2077 0.0633 0.3486 0.107 Uiso 1 1 calc R . . . .
 C43 C 0.3020(6) 0.0948(3) 0.4340(6) 0.099(3) Uani 1 1 d . . . . .
 H43A H 0.3496 0.1135 0.4341 0.119 Uiso 1 1 calc R . . . .
 H43B H 0.2551 0.1094 0.4476 0.119 Uiso 1 1 calc R . . . .
 C44 C 0.3388(7) 0.0643(3) 0.4941(5) 0.098(3) Uani 1 1 d . . . . .
 H44A H 0.3100 0.0390 0.4748 0.118 Uiso 1 1 calc R . . . .
 H44B H 0.3238 0.0712 0.5417 0.118 Uiso 1 1 calc R . . . .
 C45 C 0.4372(6) 0.0595(3) 0.5149(5) 0.094(3) Uani 1 1 d . . . . .
 H45A H 0.4652 0.0837 0.5414 0.113 Uiso 1 1 calc R . . . .
 H45B H 0.4550 0.0381 0.5535 0.113 Uiso 1 1 calc R . . . .
 C46 C 0.4747(5) 0.0513(2) 0.4532(4) 0.078(2) Uani 1 1 d . . . . .
 H46A H 0.4501 0.0702 0.4104 0.094 Uiso 1 1 calc R . . . .
 H46B H 0.4555 0.0248 0.4324 0.094 Uiso 1 1 calc R . . . .
 C47 C 0.5733(5) 0.0531(2) 0.4768(4) 0.078(2) Uani 1 1 d . . . . .
 H47A H 0.5928 0.0804 0.4902 0.094 Uiso 1 1 calc R . . . .
 H47B H 0.5986 0.0369 0.5239 0.094 Uiso 1 1 calc R . . . .
 O101 O 0.9062(3) -0.12742(13) 0.2157(3) 0.0801(15) Uani 1 1 d . . . . .
 O102 O 1.1968(4) -0.14600(19) 0.1771(4) 0.112(2) Uani 1 1 d . . . . .
 O103 O 1.2641(4) -0.20194(19) 0.2176(4) 0.119(2) Uani 1 1 d . . . . .
 O104 O 0.8327(5) -0.17741(18) 0.2466(5) 0.127(3) Uani 1 1 d . . . . .
 O105 O 0.9510(3) -0.42999(12) 0.0605(2) 0.0638(12) Uani 1 1 d . . . . .
 O106 O 1.0287(3) -0.47930(14) 0.1285(3) 0.0725(14) Uani 1 1 d . . . . .
 O107 O 1.0855(3) -0.41191(12) 0.4709(2) 0.0611(12) Uani 1 1 d . . . . .
 O108 O 1.1015(3) -0.47029(13) 0.4200(3) 0.0687(13) Uani 1 1 d . . . . .
 C101 C 0.8482(6) -0.0630(2) 0.1844(6) 0.110(3) Uani 1 1 d . . . . .
 H10A H 0.7979 -0.0456 0.1806 0.166 Uiso 1 1 calc R . . . .
 H10B H 0.8572 -0.0651 0.1333 0.166 Uiso 1 1 calc R . . . .
 H10C H 0.9018 -0.0523 0.2222 0.166 Uiso 1 1 calc R . . . .
 C102 C 0.8293(6) -0.1030(2) 0.2109(5) 0.091(3) Uani 1 1 d . . . . .
 H10D H 0.8200 -0.1012 0.2625 0.109 Uiso 1 1 calc R . . . .
 H10E H 0.7753 -0.1142 0.1733 0.109 Uiso 1 1 calc R . . . .
 C103 C 0.8969(6) -0.1651(2) 0.2329(5) 0.088(3) Uani 1 1 d . . . . .
 C110 C 1.1939(6) -0.1783(3) 0.2006(5) 0.086(2) Uani 1 1 d . . . . .
 C111 C 1.3444(8) -0.1864(4) 0.2021(9) 0.168(6) Uani 1 1 d . . . . .
 H11A H 1.3295 -0.1789 0.1466 0.202 Uiso 1 1 calc R . . . .
 H11B H 1.3655 -0.1627 0.2341 0.202 Uiso 1 1 calc R . . . .
 C112 C 1.4057(10) -0.2122(5) 0.2184(11) 0.229(9) Uani 1 1 d . . . . .
 H11C H 1.4583 -0.2016 0.2081 0.343 Uiso 1 1 calc R . . . .
 H11D H 1.3850 -0.2354 0.1861 0.343 Uiso 1 1 calc R . . . .
 H11E H 1.4208 -0.2194 0.2735 0.343 Uiso 1 1 calc R . . . .
 C114 C 1.0017(4) -0.35934(16) 0.2547(3) 0.0459(15) Uani 1 1 d . . . . .
 C115 C 0.9878(4) -0.38234(16) 0.1890(3) 0.0446(15) Uani 1 1 d . . . . .
 H115 H 0.9642 -0.3709 0.1388 0.054 Uiso 1 1 calc R . . . .
 C116 C 1.0080(4) -0.42227(16) 0.1954(3) 0.0385(14) Uani 1 1 d . . . . .
 C117 C 1.0384(3) -0.43898(16) 0.2684(3) 0.0388(14) Uani 1 1 d . . . . .
 H117 H 1.0514 -0.4661 0.2732 0.047 Uiso 1 1 calc R . . . .
 C118 C 1.0501(3) -0.41657(16) 0.3349(3) 0.0396(14) Uani 1 1 d . . . . .
 C119 C 1.0335(4) -0.37667(16) 0.3272(3) 0.0410(14) Uani 1 1 d . . . . .
 H119 H 1.0441 -0.3610 0.3727 0.049 Uiso 1 1 calc R . . . .
 C120 C 0.9980(4) -0.44692(18) 0.1266(4) 0.0473(15) Uani 1 1 d . . . . .
 C121 C 0.9396(6) -0.4526(2) -0.0113(4) 0.080(2) Uani 1 1 d . . . . .
 H12A H 0.9980 -0.4572 -0.0187 0.096 Uiso 1 1 calc R . . . .
 H12B H 0.9121 -0.4782 -0.0078 0.096 Uiso 1 1 calc R . . . .
 C122 C 0.8831(6) -0.4303(2) -0.0762(4) 0.093(3) Uani 1 1 d . . . . .
 H12C H 0.8746 -0.4448 -0.1247 0.140 Uiso 1 1 calc R . . . .
 H12D H 0.9110 -0.4050 -0.0794 0.140 Uiso 1 1 calc R . . . .
 H12E H 0.8254 -0.4259 -0.0684 0.140 Uiso 1 1 calc R . . . .
 C123 C 1.0813(4) -0.43580(19) 0.4115(4) 0.0508(16) Uani 1 1 d . . . . .
 C124 C 1.1187(5) -0.4277(2) 0.5497(4) 0.073(2) Uani 1 1 d . . . . .
 H12F H 1.1440 -0.4062 0.5868 0.087 Uiso 1 1 calc R . . . .
 H12G H 1.1666 -0.4467 0.5527 0.087 Uiso 1 1 calc R . . . .
 C125 C 1.0471(6) -0.4470(3) 0.5717(5) 0.106(3) Uani 1 1 d . . . . .
 H12H H 1.0707 -0.4574 0.6247 0.158 Uiso 1 1 calc R . . . .
 H12I H 1.0227 -0.4685 0.5354 0.158 Uiso 1 1 calc R . . . .
 H12J H 1.0000 -0.4281 0.5694 0.158 Uiso 1 1 calc R . . . .
 C113 C 0.9923(13) -0.3170(6) 0.2500(13) 0.109(8) Uani 0.735(5) 1 d . U P A -1
 H11F H 0.9320 -0.3116 0.2143 0.131 Uiso 0.735(5) 1 calc R . P A -1
 H11G H 0.9930 -0.3080 0.3022 0.131 Uiso 0.735(5) 1 calc R . P A -1
 N101 N 1.0416(5) -0.2959(2) 0.2303(5) 0.067(2) Uani 0.735(5) 1 d . U P A -1
 H101 H 1.0830 -0.3077 0.2156 0.080 Uiso 0.735(5) 1 calc R . P A -1
 C104 C 0.9778(6) -0.1904(2) 0.2241(5) 0.043(2) Uani 0.735(5) 1 d . U P A -1
 C105 C 0.9719(6) -0.2308(2) 0.2308(5) 0.049(2) Uani 0.735(5) 1 d . U P A -1
 H105 H 0.9204 -0.2423 0.2377 0.059 Uiso 0.735(5) 1 calc R . P A -1
 C106 C 1.0423(6) -0.2541(2) 0.2274(5) 0.054(2) Uani 0.735(5) 1 d . U P A -1
 C107 C 1.1164(6) -0.2363(2) 0.2176(5) 0.053(2) Uani 0.735(5) 1 d . U P A -1
 H107 H 1.1644 -0.2522 0.2153 0.064 Uiso 0.735(5) 1 calc R . P A -1
 C108 C 1.1235(7) -0.1966(3) 0.2111(6) 0.047(2) Uani 0.735(5) 1 d . U P A -1
 C109 C 1.0530(7) -0.1737(2) 0.2135(6) 0.049(3) Uani 0.735(5) 1 d . U P A -1
 H109 H 1.0558 -0.1462 0.2078 0.058 Uiso 0.735(5) 1 calc R . P A -1
 O109 O 1.2378(5) -0.3208(2) 0.2824(5) 0.066(2) Uani 0.735(5) 1 d . U P A -1
 O110 O 1.1862(4) -0.3024(2) 0.4216(5) 0.073(2) Uani 0.735(5) 1 d . U P A -1
 O111 O 0.9986(4) -0.29912(17) 0.4392(3) 0.0551(16) Uani 0.735(5) 1 d . U P A
 -1
 O112 O 0.8413(4) -0.2828(2) 0.3467(4) 0.078(2) Uani 0.735(5) 1 d . U P A -1
 O113 O 0.7587(7) -0.2766(4) 0.1787(7) 0.085(3) Uani 0.735(5) 1 d . U P A -1
 O114 O 0.8257(8) -0.2979(3) 0.0513(8) 0.101(3) Uani 0.735(5) 1 d . U P A -1
 C126 C 1.2940(9) -0.3058(3) 0.3521(9) 0.080(4) Uani 0.735(5) 1 d . U P A -1
 H12K H 1.3413 -0.2904 0.3407 0.096 Uiso 0.735(5) 1 calc R . P A -1
 H12L H 1.3228 -0.3279 0.3860 0.096 Uiso 0.735(5) 1 calc R . P A -1
 C127 C 1.2489(8) -0.2806(3) 0.3956(8) 0.080(3) Uani 0.735(5) 1 d . U P A -1
 H12M H 1.2939 -0.2689 0.4412 0.096 Uiso 0.735(5) 1 calc R . P A -1
 H12N H 1.2178 -0.2590 0.3614 0.096 Uiso 0.735(5) 1 calc R . P A -1
 C128 C 1.1495(9) -0.2787(4) 0.4663(9) 0.082(4) Uani 0.735(5) 1 d . U P A -1
 H12O H 1.1169 -0.2569 0.4338 0.099 Uiso 0.735(5) 1 calc R . P A -1
 H12P H 1.1976 -0.2674 0.5100 0.099 Uiso 0.735(5) 1 calc R . P A -1
 C129 C 1.0870(9) -0.3013(5) 0.4984(8) 0.069(3) Uani 0.735(5) 1 d . U P A -1
 H12Q H 1.1065 -0.3289 0.5079 0.083 Uiso 0.735(5) 1 calc R . P A -1
 H12R H 1.0855 -0.2897 0.5481 0.083 Uiso 0.735(5) 1 calc R . P A -1
 C130 C 0.9296(7) -0.3176(3) 0.4554(6) 0.055(2) Uani 0.735(5) 1 d . U P A -1
 C131 C 0.9395(10) -0.3416(4) 0.5169(8) 0.068(3) Uani 0.735(5) 1 d . U P A -1
 H131 H 0.9970 -0.3468 0.5519 0.082 Uiso 0.735(5) 1 calc R . P A -1
 C132 C 0.8633(12) -0.3593(3) 0.5291(8) 0.096(4) Uani 0.735(5) 1 d . U P A -1
 H132 H 0.8691 -0.3756 0.5729 0.115 Uiso 0.735(5) 1 calc R . P A -1
 C133 C 0.7810(11) -0.3520(4) 0.4759(11) 0.099(4) Uani 0.735(5) 1 d . U P A -1
 H133 H 0.7302 -0.3648 0.4814 0.119 Uiso 0.735(5) 1 calc R . P A -1
 C134 C 0.7715(8) -0.3266(4) 0.4152(9) 0.084(3) Uani 0.735(5) 1 d . U P A -1
 H134 H 0.7143 -0.3212 0.3800 0.101 Uiso 0.735(5) 1 calc R . P A -1
 C135 C 0.8459(7) -0.3088(3) 0.4053(7) 0.064(3) Uani 0.735(5) 1 d . U P A -1
 C136 C 0.7599(8) -0.2625(4) 0.3014(9) 0.101(4) Uani 0.735(5) 1 d . U P A -1
 H13A H 0.7201 -0.2606 0.3340 0.121 Uiso 0.735(5) 1 calc R . P A -1
 H13B H 0.7759 -0.2355 0.2913 0.121 Uiso 0.735(5) 1 calc R . P A -1
 C137 C 0.7162(7) -0.2782(4) 0.2358(7) 0.078(3) Uani 0.735(5) 1 d . U P A -1
 H13C H 0.6581 -0.2648 0.2157 0.093 Uiso 0.735(5) 1 calc R . P A -1
 H13D H 0.7046 -0.3059 0.2450 0.093 Uiso 0.735(5) 1 calc R . P A -1
 C138 C 0.7089(9) -0.2819(4) 0.1014(8) 0.093(4) Uani 0.735(5) 1 d . U P A -1
 H13E H 0.6529 -0.2669 0.0899 0.112 Uiso 0.735(5) 1 calc R . P A -1
 H13F H 0.6936 -0.3099 0.0918 0.112 Uiso 0.735(5) 1 calc R . P A -1
 C139 C 0.7556(8) -0.2696(4) 0.0523(9) 0.099(4) Uani 0.735(5) 1 d . U P A -1
 H13G H 0.7829 -0.2438 0.0700 0.119 Uiso 0.735(5) 1 calc R . P A -1
 H13H H 0.7142 -0.2664 -0.0011 0.119 Uiso 0.735(5) 1 calc R . P A -1
 C140 C 0.8791(10) -0.2830(4) 0.0163(10) 0.097(4) Uani 0.735(5) 1 d . U P A -1
 H14A H 0.9165 -0.2625 0.0494 0.117 Uiso 0.735(5) 1 calc R . P A -1
 H14B H 0.8441 -0.2709 -0.0336 0.117 Uiso 0.735(5) 1 calc R . P A -1
 C141 C 0.9389(10) -0.3160(4) 0.0006(9) 0.102(4) Uani 0.735(5) 1 d . U P A -1
 H14C H 0.9652 -0.3306 0.0497 0.122 Uiso 0.735(5) 1 calc R . P A -1
 H14D H 0.9009 -0.3343 -0.0378 0.122 Uiso 0.735(5) 1 calc R . P A -1
 C142 C 1.0111(9) -0.3028(4) -0.0283(8) 0.107(4) Uani 0.735(5) 1 d . U P A -1
 H14E H 1.0449 -0.2824 0.0077 0.129 Uiso 0.735(5) 1 calc R . P A -1
 H14F H 0.9838 -0.2900 -0.0794 0.129 Uiso 0.735(5) 1 calc R . P A -1
 C143 C 1.0754(13) -0.3320(5) -0.0382(9) 0.112(7) Uani 0.735(5) 1 d . U P A -1
 H14G H 1.1203 -0.3179 -0.0556 0.135 Uiso 0.735(5) 1 calc R . P A -1
 H14H H 1.0434 -0.3496 -0.0812 0.135 Uiso 0.735(5) 1 calc R . P A -1
 C144 C 1.1235(9) -0.3568(3) 0.0299(7) 0.101(4) Uani 0.735(5) 1 d . U P A -1
 H14I H 1.1637 -0.3747 0.0139 0.121 Uiso 0.735(5) 1 calc R . P A -1
 H14J H 1.0798 -0.3731 0.0447 0.121 Uiso 0.735(5) 1 calc R . P A -1
 C145 C 1.1771(10) -0.3341(4) 0.1003(8) 0.090(4) Uani 0.735(5) 1 d . U P A -1
 H14K H 1.1374 -0.3160 0.1164 0.108 Uiso 0.735(5) 1 calc R . P A -1
 H14L H 1.2219 -0.3182 0.0863 0.108 Uiso 0.735(5) 1 calc R . P A -1
 C146 C 1.2235(8) -0.3604(3) 0.1682(8) 0.087(4) Uani 0.735(5) 1 d . U P A -1
 H14M H 1.1774 -0.3748 0.1835 0.104 Uiso 0.735(5) 1 calc R . P A -1
 H14N H 1.2579 -0.3801 0.1493 0.104 Uiso 0.735(5) 1 calc R . P A -1
 C147 C 1.2844(8) -0.3420(3) 0.2393(10) 0.084(4) Uani 0.735(5) 1 d . U P A -1
 H14O H 1.3208 -0.3626 0.2731 0.101 Uiso 0.735(5) 1 calc R . P A -1
 H14P H 1.3251 -0.3241 0.2242 0.101 Uiso 0.735(5) 1 calc R . P A -1
 N201 N 0.971(2) -0.3186(10) 0.2433(18) 0.021(6) Uiso 0.265(5) 1 d . U P A -2
 H201 H 0.9235 -0.3112 0.2054 0.025 Uiso 0.265(5) 1 calc R . P A -2
 C213 C 1.0239(16) -0.2924(7) 0.2984(14) 0.053(6) Uiso 0.265(5) 1 d . U P A -2
 H21A H 1.0851 -0.3029 0.3158 0.064 Uiso 0.265(5) 1 calc R . P A -2
 H21B H 1.0025 -0.2925 0.3443 0.064 Uiso 0.265(5) 1 calc R . P A -2
 C214 C 1.0283(11) -0.2513(4) 0.2749(11) 0.050(6) Uiso 0.265(5) 1 d . U P A -2
 C215 C 1.1000(10) -0.2374(5) 0.2541(11) 0.047(7) Uiso 0.265(5) 1 d G U P A -2
 H215 H 1.1476 -0.2544 0.2550 0.056 Uiso 0.265(5) 1 calc R . P A -2
 C216 C 1.1021(11) -0.1986(5) 0.2320(12) 0.034(8) Uiso 0.265(5) 1 d G U P A -2
 C217 C 1.0325(14) -0.1737(4) 0.2307(12) 0.030(9) Uiso 0.265(5) 1 d G U P A -2
 H217 H 1.0339 -0.1472 0.2156 0.036 Uiso 0.265(5) 1 calc R . P A -2
 C218 C 0.9607(11) -0.1876(5) 0.2515(12) 0.039(8) Uiso 0.265(5) 1 d G U P A -2
 C219 C 0.9587(9) -0.2264(5) 0.2736(11) 0.056(7) Uiso 0.265(5) 1 d G U P A -2
 H219 H 0.9097 -0.2360 0.2878 0.067 Uiso 0.265(5) 1 calc R . P A -2
 O209 O 0.777(3) -0.2938(12) 0.230(2) 0.155(13) Uiso 0.265(5) 1 d . U P A -2
 O210 O 0.789(5) -0.300(2) 0.062(4) 0.24(3) Uiso 0.265(5) 1 d . U P A -2
 O211 O 1.0136(14) -0.3035(6) 0.0631(12) 0.083(6) Uiso 0.265(5) 1 d . U P A -2
 O212 O 1.1775(15) -0.3186(7) 0.1646(14) 0.097(7) Uiso 0.265(5) 1 d . U P A -2
 O213 O 1.2444(17) -0.3093(7) 0.3337(16) 0.063(7) Uiso 0.265(5) 1 d . U P A -2
 O214 O 1.193(2) -0.3019(9) 0.4740(18) 0.105(9) Uiso 0.265(5) 1 d . U P A -2
 C226 C 0.743(5) -0.291(2) 0.179(5) 0.13(2) Uiso 0.265(5) 1 d . U P A -2
 H22A H 0.6837 -0.2823 0.1775 0.153 Uiso 0.265(5) 1 calc R . P A -2
 H22B H 0.7363 -0.3175 0.1549 0.153 Uiso 0.265(5) 1 calc R . P A -2
 C227 C 0.772(4) -0.2662(14) 0.129(4) 0.124(15) Uiso 0.265(5) 1 d . U P A -2
 H22C H 0.8269 -0.2522 0.1579 0.149 Uiso 0.265(5) 1 calc R . P A -2
 H22D H 0.7253 -0.2469 0.1034 0.149 Uiso 0.265(5) 1 calc R . P A -2
 C228 C 0.866(5) -0.282(2) 0.069(4) 0.16(2) Uiso 0.265(5) 1 d . U P A -2
 H22E H 0.9054 -0.2870 0.1229 0.193 Uiso 0.265(5) 1 calc R . P A -2
 H22F H 0.8540 -0.2537 0.0649 0.193 Uiso 0.265(5) 1 calc R . P A -2
 C229 C 0.925(3) -0.2923(16) 0.010(3) 0.105(15) Uiso 0.265(5) 1 d . U P A -2
 H22G H 0.8977 -0.3141 -0.0256 0.126 Uiso 0.265(5) 1 calc R . P A -2
 H22H H 0.9291 -0.2691 -0.0216 0.126 Uiso 0.265(5) 1 calc R . P A -2
 C230 C 1.0726(17) -0.3193(8) 0.0323(18) 0.084(9) Uiso 0.265(5) 1 d . U P A -2
 C231 C 1.0583(15) -0.3272(9) -0.0462(16) 0.086(16) Uiso 0.265(5) 1 d G U P A
 -2
 H231 H 1.0014 -0.3230 -0.0829 0.103 Uiso 0.265(5) 1 calc R . P A -2
 C232 C 1.127(2) -0.3413(9) -0.0708(13) 0.131(13) Uiso 0.265(5) 1 d G U P A -2
 H232 H 1.1174 -0.3467 -0.1244 0.157 Uiso 0.265(5) 1 calc R . P A -2
 C233 C 1.2104(17) -0.3476(7) -0.0170(18) 0.124(13) Uiso 0.265(5) 1 d G U P A
 -2
 H233 H 1.2575 -0.3572 -0.0338 0.149 Uiso 0.265(5) 1 calc R . P A -2
 C234 C 1.2247(16) -0.3397(8) 0.0615(16) 0.110(11) Uiso 0.265(5) 1 d G U P A
 -2
 H234 H 1.2815 -0.3439 0.0982 0.133 Uiso 0.265(5) 1 calc R . P A -2
 C235 C 1.156(2) -0.3256(9) 0.0861(13) 0.120(18) Uiso 0.265(5) 1 d G U P A -2
 C236 C 1.231(3) -0.3450(13) 0.218(2) 0.089(12) Uiso 0.265(5) 1 d . U P A -2
 H23A H 1.2642 -0.3608 0.1905 0.107 Uiso 0.265(5) 1 calc R . P A -2
 H23B H 1.1918 -0.3631 0.2347 0.107 Uiso 0.265(5) 1 calc R . P A -2
 C237 C 1.296(3) -0.3289(15) 0.289(3) 0.105(14) Uiso 0.265(5) 1 d . U P A -2
 H23C H 1.3353 -0.3099 0.2745 0.126 Uiso 0.265(5) 1 calc R . P A -2
 H23D H 1.3327 -0.3501 0.3200 0.126 Uiso 0.265(5) 1 calc R . P A -2
 C238 C 1.307(2) -0.2964(10) 0.4065(19) 0.071(9) Uiso 0.265(5) 1 d . U P A -2
 H23E H 1.3499 -0.2777 0.3965 0.085 Uiso 0.265(5) 1 calc R . P A -2
 H23F H 1.3405 -0.3190 0.4356 0.085 Uiso 0.265(5) 1 calc R . P A -2
 C239 C 1.254(2) -0.2769(10) 0.453(2) 0.081(9) Uiso 0.265(5) 1 d . U P A -2
 H23G H 1.2964 -0.2660 0.5013 0.098 Uiso 0.265(5) 1 calc R . P A -2
 H23H H 1.2210 -0.2547 0.4223 0.098 Uiso 0.265(5) 1 calc R . P A -2
 C240 C 1.135(4) -0.2836(15) 0.501(3) 0.093(15) Uiso 0.265(5) 1 d . U P A -2
 H24A H 1.1104 -0.2611 0.4665 0.111 Uiso 0.265(5) 1 calc R . P A -2
 H24B H 1.1663 -0.2732 0.5535 0.111 Uiso 0.265(5) 1 calc R . P A -2
 C241 C 1.059(4) -0.3100(19) 0.505(4) 0.12(2) Uiso 0.265(5) 1 d . U P A -2
 H24C H 1.0510 -0.3287 0.4620 0.146 Uiso 0.265(5) 1 calc R . P A -2
 H24D H 1.0847 -0.3254 0.5535 0.146 Uiso 0.265(5) 1 calc R . P A -2
 C242 C 0.977(4) -0.3029(15) 0.505(3) 0.145(16) Uiso 0.265(5) 1 d . U P A -2
 H24E H 0.9486 -0.2885 0.4563 0.175 Uiso 0.265(5) 1 calc R . P A -2
 H24F H 0.9829 -0.2840 0.5480 0.175 Uiso 0.265(5) 1 calc R . P A -2
 C243 C 0.906(5) -0.335(2) 0.513(5) 0.16(3) Uiso 0.265(5) 1 d . U P A -2
 H24G H 0.9139 -0.3579 0.4817 0.192 Uiso 0.265(5) 1 calc R . P A -2
 H24H H 0.9263 -0.3438 0.5678 0.192 Uiso 0.265(5) 1 calc R . P A -2
 C244 C 0.808(5) -0.330(2) 0.493(4) 0.18(2) Uiso 0.265(5) 1 d . U P A -2
 H24I H 0.7930 -0.3198 0.5383 0.220 Uiso 0.265(5) 1 calc R . P A -2
 H24J H 0.7778 -0.3557 0.4780 0.220 Uiso 0.265(5) 1 calc R . P A -2
 C245 C 0.780(5) -0.301(2) 0.423(4) 0.19(2) Uiso 0.265(5) 1 d . U P A -2
 H24K H 0.7152 -0.2966 0.4089 0.222 Uiso 0.265(5) 1 calc R . P A -2
 H24L H 0.8087 -0.2753 0.4415 0.222 Uiso 0.265(5) 1 calc R . P A -2
 C246 C 0.798(4) -0.3097(19) 0.359(4) 0.154(18) Uiso 0.265(5) 1 d . U P A -2
 H24M H 0.8582 -0.3004 0.3625 0.185 Uiso 0.265(5) 1 calc R . P A -2
 H24N H 0.7969 -0.3385 0.3526 0.185 Uiso 0.265(5) 1 calc R . P A -2
 C247 C 0.744(2) -0.2950(11) 0.304(2) 0.086(9) Uiso 0.265(5) 1 d . U P A -2
 H24O H 0.7320 -0.2680 0.3171 0.103 Uiso 0.265(5) 1 calc R . P A -2
 H24P H 0.6882 -0.3100 0.2909 0.103 Uiso 0.265(5) 1 calc R . P A -2

loop_
  _atom_site_aniso_label
  _atom_site_aniso_U_11
  _atom_site_aniso_U_22
  _atom_site_aniso_U_33
  _atom_site_aniso_U_23
  _atom_site_aniso_U_13
  _atom_site_aniso_U_12
 O1 0.096(4) 0.057(3) 0.089(4) 0.020(3) 0.033(3) 0.021(3)
 O2 0.069(4) 0.066(3) 0.119(5) 0.014(3) 0.032(3) 0.009(3)
 O3 0.098(5) 0.088(4) 0.154(6) -0.009(4) 0.070(4) -0.016(4)
 O4 0.131(5) 0.085(4) 0.137(6) 0.029(4) 0.069(5) -0.014(4)
 O5 0.198(7) 0.086(4) 0.058(4) 0.023(3) 0.038(4) 0.033(4)
 O6 0.192(7) 0.068(4) 0.105(5) 0.038(4) 0.062(5) 0.046(4)
 O7 0.232(9) 0.124(6) 0.062(4) -0.024(4) 0.059(5) -0.023(5)
 O8 0.224(8) 0.088(5) 0.110(5) -0.022(4) 0.085(5) -0.016(5)
 N1 0.050(3) 0.060(4) 0.075(4) 0.014(3) 0.023(3) 0.012(3)
 C1 0.225(15) 0.160(12) 0.31(2) 0.156(13) 0.144(15) 0.124(11)
 C2 0.099(7) 0.064(5) 0.140(8) 0.014(5) 0.052(6) 0.027(5)
 C3 0.069(5) 0.055(5) 0.050(4) 0.004(3) 0.010(4) 0.005(4)
 C4 0.056(4) 0.043(4) 0.048(4) 0.003(3) 0.004(3) -0.005(3)
 C5 0.044(4) 0.057(4) 0.055(4) 0.006(3) 0.001(3) -0.005(3)
 C6 0.046(4) 0.042(4) 0.061(4) 0.006(3) -0.001(3) 0.005(3)
 C7 0.046(4) 0.056(4) 0.058(4) -0.003(3) 0.002(3) -0.002(3)
 C8 0.066(5) 0.054(4) 0.058(4) 0.001(3) 0.012(4) -0.005(4)
 C9 0.073(5) 0.043(4) 0.053(4) 0.000(3) 0.008(4) -0.005(4)
 C10 0.075(6) 0.075(6) 0.093(6) -0.007(5) 0.037(5) -0.012(5)
 C11 0.144(10) 0.124(9) 0.257(15) -0.042(9) 0.157(11) -0.045(8)
 C12 0.122(11) 0.248(18) 0.33(2) -0.083(16) 0.145(13) -0.021(11)
 C13 0.043(4) 0.065(5) 0.080(5) 0.031(4) 0.020(4) 0.007(3)
 C14 0.035(3) 0.047(4) 0.056(4) 0.006(3) 0.013(3) -0.001(3)
 C15 0.041(4) 0.057(4) 0.053(4) 0.002(3) 0.011(3) 0.004(3)
 C16 0.052(4) 0.045(4) 0.053(4) 0.002(3) 0.019(3) 0.007(3)
 C17 0.055(4) 0.046(4) 0.078(5) 0.008(4) 0.036(4) 0.004(3)
 C18 0.061(4) 0.063(5) 0.052(4) -0.010(4) 0.032(3) -0.004(3)
 C19 0.050(4) 0.070(5) 0.056(4) 0.024(4) 0.027(3) 0.003(3)
 C20 0.092(6) 0.066(5) 0.069(6) 0.024(5) 0.024(4) 0.023(4)
 C21 0.178(11) 0.100(8) 0.089(7) 0.023(6) 0.003(7) 0.001(8)
 C22 0.160(11) 0.103(8) 0.116(9) 0.009(7) -0.009(8) 0.009(7)
 C23 0.139(8) 0.073(6) 0.092(7) 0.003(6) 0.058(6) -0.012(6)
 C24 0.32(3) 0.106(11) 0.22(2) -0.017(11) 0.007(18) -0.106(14)
 C25 0.56(5) 0.149(15) 0.148(15) -0.047(11) 0.17(2) -0.14(2)
 O9 0.078(4) 0.088(4) 0.056(3) 0.008(3) 0.024(3) -0.002(3)
 O10 0.057(3) 0.067(3) 0.045(3) 0.016(2) 0.015(2) 0.012(2)
 O11 0.038(2) 0.067(3) 0.046(3) 0.001(2) 0.0127(19) 0.005(2)
 O12 0.049(3) 0.062(3) 0.045(3) -0.010(2) 0.002(2) 0.009(2)
 O13 0.049(3) 0.043(3) 0.097(4) -0.008(3) 0.013(3) -0.002(2)
 O14 0.037(3) 0.079(3) 0.094(4) 0.018(3) 0.015(3) 0.007(2)
 C26 0.078(6) 0.106(6) 0.037(4) 0.026(4) -0.004(4) -0.029(5)
 C27 0.060(5) 0.081(5) 0.056(5) 0.025(4) 0.004(4) 0.001(4)
 C28 0.033(3) 0.056(4) 0.051(4) 0.003(3) 0.008(3) -0.002(3)
 C29 0.035(3) 0.064(4) 0.043(4) 0.004(3) 0.009(3) 0.001(3)
 C30 0.060(4) 0.047(4) 0.038(4) -0.004(3) 0.020(3) 0.007(3)
 C31 0.064(5) 0.066(5) 0.053(4) -0.001(4) 0.023(4) 0.003(4)
 C32 0.098(6) 0.068(5) 0.082(6) 0.016(4) 0.053(5) 0.004(4)
 C33 0.112(7) 0.098(7) 0.049(5) 0.011(5) 0.030(5) 0.018(6)
 C34 0.085(5) 0.073(5) 0.037(4) -0.001(4) 0.013(4) 0.014(4)
 C35 0.060(4) 0.050(4) 0.038(4) -0.010(3) 0.015(3) 0.012(3)
 C36 0.058(4) 0.072(5) 0.055(4) -0.024(4) -0.009(4) 0.018(4)
 C37 0.055(4) 0.058(5) 0.082(5) -0.020(4) -0.008(4) 0.000(4)
 C38 0.061(5) 0.063(5) 0.103(6) 0.011(5) -0.009(5) -0.027(4)
 C39 0.044(4) 0.083(6) 0.110(7) 0.028(5) 0.012(5) 0.001(4)
 C40 0.055(5) 0.096(7) 0.147(9) 0.030(6) 0.055(6) 0.019(5)
 C41 0.076(6) 0.087(6) 0.146(9) 0.008(7) 0.051(6) 0.020(5)
 C42 0.077(6) 0.066(5) 0.134(8) 0.029(6) 0.047(6) 0.012(4)
 C43 0.120(8) 0.089(7) 0.108(7) -0.012(6) 0.066(6) 0.013(6)
 C44 0.142(9) 0.097(7) 0.080(6) 0.009(5) 0.069(6) 0.015(6)
 C45 0.105(7) 0.106(7) 0.078(6) 0.014(5) 0.038(5) -0.015(6)
 C46 0.096(6) 0.083(6) 0.070(5) 0.011(4) 0.047(5) 0.004(5)
 C47 0.098(6) 0.093(6) 0.043(4) 0.014(4) 0.022(4) -0.023(5)
 O101 0.078(3) 0.045(3) 0.108(4) 0.008(3) 0.017(3) 0.010(3)
 O102 0.126(5) 0.090(5) 0.114(5) 0.049(4) 0.028(4) 0.004(4)
 O103 0.095(5) 0.105(5) 0.156(6) 0.040(4) 0.038(4) 0.026(4)
 O104 0.110(5) 0.073(4) 0.213(8) 0.038(5) 0.071(5) 0.008(4)
 O105 0.078(3) 0.054(3) 0.048(3) -0.007(2) 0.004(2) 0.009(2)
 O106 0.087(4) 0.055(3) 0.065(3) -0.014(2) 0.008(3) 0.021(3)
 O107 0.084(3) 0.058(3) 0.043(3) 0.008(2) 0.022(2) 0.016(2)
 O108 0.097(4) 0.050(3) 0.058(3) 0.010(2) 0.023(3) 0.019(3)
 C101 0.116(7) 0.055(5) 0.162(9) 0.015(6) 0.046(7) 0.028(5)
 C102 0.098(6) 0.059(5) 0.119(7) 0.003(5) 0.038(5) 0.012(5)
 C103 0.079(6) 0.054(5) 0.113(7) 0.015(5) 0.004(5) -0.004(4)
 C110 0.080(6) 0.086(7) 0.083(6) 0.011(5) 0.012(5) 0.010(6)
 C111 0.108(9) 0.163(12) 0.266(17) 0.085(12) 0.105(11) 0.014(9)
 C112 0.168(15) 0.181(15) 0.39(3) 0.093(16) 0.168(17) 0.044(12)
 C114 0.055(4) 0.033(3) 0.048(4) 0.001(3) 0.014(3) 0.002(3)
 C115 0.050(4) 0.039(4) 0.038(4) 0.006(3) 0.004(3) 0.002(3)
 C116 0.037(3) 0.037(3) 0.039(4) -0.006(3) 0.009(3) -0.004(3)
 C117 0.032(3) 0.034(3) 0.050(4) 0.003(3) 0.012(3) 0.002(2)
 C118 0.036(3) 0.043(4) 0.039(4) 0.009(3) 0.009(3) 0.005(3)
 C119 0.044(3) 0.042(4) 0.038(4) -0.002(3) 0.013(3) 0.003(3)
 C120 0.043(4) 0.045(4) 0.051(4) -0.004(3) 0.011(3) 0.000(3)
 C121 0.112(6) 0.065(5) 0.051(5) -0.024(4) 0.006(4) 0.012(4)
 C122 0.124(7) 0.076(6) 0.059(5) -0.009(4) -0.001(5) 0.008(5)
 C123 0.056(4) 0.052(4) 0.046(4) 0.002(3) 0.017(3) 0.007(3)
 C124 0.110(6) 0.061(5) 0.043(4) -0.002(4) 0.019(4) 0.010(4)
 C125 0.127(8) 0.116(8) 0.086(6) 0.025(6) 0.052(6) 0.000(6)
 C113 0.128(17) 0.052(8) 0.099(11) 0.024(7) -0.035(11) -0.039(10)
 N101 0.077(6) 0.052(5) 0.092(6) 0.016(4) 0.056(5) 0.015(4)
 C104 0.050(6) 0.041(5) 0.042(6) 0.007(4) 0.020(5) 0.010(4)
 C105 0.055(5) 0.036(5) 0.059(6) 0.011(4) 0.021(5) -0.003(4)
 C106 0.071(6) 0.035(5) 0.063(6) 0.015(4) 0.032(5) 0.010(5)
 C107 0.059(6) 0.050(6) 0.058(6) 0.018(4) 0.029(5) 0.016(4)
 C108 0.053(6) 0.047(6) 0.045(6) 0.020(4) 0.020(5) 0.015(5)
 C109 0.062(7) 0.036(6) 0.049(6) 0.006(4) 0.019(6) -0.001(5)
 O109 0.056(5) 0.065(4) 0.085(6) 0.005(4) 0.033(4) 0.004(4)
 O110 0.055(4) 0.075(5) 0.089(6) 0.001(4) 0.025(4) 0.005(4)
 O111 0.050(4) 0.062(4) 0.052(4) -0.008(3) 0.013(3) 0.002(3)
 O112 0.047(4) 0.120(6) 0.067(5) 0.010(5) 0.017(3) 0.019(4)
 O113 0.064(5) 0.108(8) 0.080(6) 0.007(6) 0.021(5) -0.023(5)
 O114 0.101(8) 0.079(6) 0.148(9) 0.024(6) 0.074(7) 0.007(5)
 C126 0.052(8) 0.078(8) 0.111(12) 0.003(7) 0.028(8) -0.015(6)
 C127 0.070(8) 0.081(8) 0.090(9) 0.014(7) 0.027(7) -0.010(6)
 C128 0.063(8) 0.095(9) 0.082(10) -0.008(8) 0.013(7) -0.013(7)
 C129 0.060(9) 0.090(9) 0.050(7) -0.015(6) 0.007(6) -0.006(7)
 C130 0.065(7) 0.050(5) 0.055(6) -0.016(5) 0.027(5) -0.003(5)
 C131 0.091(9) 0.057(7) 0.066(7) -0.014(6) 0.037(7) -0.004(7)
 C132 0.150(13) 0.061(7) 0.103(10) -0.001(7) 0.076(9) 0.006(8)
 C133 0.102(10) 0.072(8) 0.148(13) -0.045(9) 0.073(10) -0.018(8)
 C134 0.080(8) 0.074(8) 0.108(10) -0.016(8) 0.044(7) 0.002(7)
 C135 0.051(6) 0.068(7) 0.079(8) -0.032(6) 0.030(6) -0.004(5)
 C136 0.065(8) 0.116(11) 0.123(11) 0.006(9) 0.030(7) 0.016(7)
 C137 0.067(7) 0.099(8) 0.079(8) -0.014(7) 0.039(7) 0.018(6)
 C138 0.090(9) 0.093(9) 0.097(10) 0.007(8) 0.027(8) 0.009(7)
 C139 0.083(8) 0.100(9) 0.129(11) 0.011(8) 0.052(8) 0.027(7)
 C140 0.081(9) 0.107(10) 0.118(11) 0.021(8) 0.053(9) 0.012(8)
 C141 0.133(12) 0.081(9) 0.109(10) 0.027(8) 0.063(9) 0.014(8)
 C142 0.107(10) 0.111(10) 0.112(10) 0.016(8) 0.046(8) -0.006(8)
 C143 0.163(14) 0.089(10) 0.111(12) 0.015(8) 0.079(10) 0.029(10)
 C144 0.165(12) 0.070(7) 0.093(9) -0.006(7) 0.076(9) 0.033(8)
 C145 0.127(10) 0.070(8) 0.113(10) 0.008(8) 0.095(9) 0.014(8)
 C146 0.075(8) 0.066(7) 0.127(11) 0.010(8) 0.043(8) 0.017(6)
 C147 0.037(6) 0.079(8) 0.146(12) -0.012(8) 0.043(7) -0.004(6)

_geom_special_details
;
 All esds (except the esd in the dihedral angle between two l.s. planes)
 are estimated using the full covariance matrix.  The cell esds are taken
 into account individually in the estimation of esds in distances, angles
 and torsion angles; correlations between esds in cell parameters are only
 used when they are defined by crystal symmetry.  An approximate (isotropic)
 treatment of cell esds is used for estimating esds involving l.s. planes.
;
loop_
  _geom_bond_atom_site_label_1
  _geom_bond_atom_site_label_2
  _geom_bond_distance
  _geom_bond_site_symmetry_2
  _geom_bond_publ_flag
 O1 C2 1.471(8) . ?
 O1 C3 1.337(8) . ?
 O2 C3 1.188(8) . ?
 O3 C10 1.336(9) . ?
 O3 C11 1.472(10) . ?
 O4 C10 1.188(9) . ?
 O5 C20 1.323(9) . ?
 O5 C21 1.536(10) . ?
 O6 C20 1.192(9) . ?
 O7 C23 1.327(10) . ?
 O7 C24 1.62(2) . ?
 O8 C23 1.205(10) . ?
 N1 H1 0.8800 . ?
 N1 C6 1.393(8) . ?
 N1 C13 1.403(8) . ?
 C1 H1A 0.9800 . ?
 C1 H1B 0.9800 . ?
 C1 H1C 0.9800 . ?
 C1 C2 1.424(12) . ?
 C2 H2A 0.9900 . ?
 C2 H2B 0.9900 . ?
 C3 C4 1.482(9) . ?
 C4 C5 1.392(8) . ?
 C4 C9 1.373(9) . ?
 C5 H5 0.9500 . ?
 C5 C6 1.400(9) . ?
 C6 C7 1.385(9) . ?
 C7 H7 0.9500 . ?
 C7 C8 1.371(9) . ?
 C8 C9 1.395(9) . ?
 C8 C10 1.485(10) . ?
 C9 H9 0.9500 . ?
 C11 H11H 0.9900 . ?
 C11 H11I 0.9900 . ?
 C11 C12 1.271(14) . ?
 C12 H12S 0.9800 . ?
 C12 H12T 0.9800 . ?
 C12 H12U 0.9800 . ?
 C13 H13I 0.9900 . ?
 C13 H13J 0.9900 . ?
 C13 C14 1.514(9) . ?
 C14 C15 1.375(8) . ?
 C14 C19 1.381(9) . ?
 C15 H15 0.9500 . ?
 C15 C16 1.396(8) . ?
 C16 C17 1.357(9) . ?
 C16 C20 1.488(9) . ?
 C17 H17 0.9500 . ?
 C17 C18 1.379(9) . ?
 C18 C19 1.385(9) . ?
 C18 C23 1.473(11) . ?
 C19 H19 0.9500 . ?
 C21 H21C 0.9900 . ?
 C21 H21D 0.9900 . ?
 C21 C22 1.377(12) . ?
 C22 H22I 0.9800 . ?
 C22 H22J 0.9800 . ?
 C22 H22K 0.9800 . ?
 C24 H24Q 0.9900 . ?
 C24 H24R 0.9900 . ?
 C24 C25 1.22(3) . ?
 C25 H25A 0.9800 . ?
 C25 H25B 0.9800 . ?
 C25 H25C 0.9800 . ?
 O9 C26 1.419(8) . ?
 O9 C47 1.394(8) . ?
 O10 C27 1.428(7) . ?
 O10 C28 1.403(7) . ?
 O11 C29 1.436(6) . ?
 O11 C30 1.376(7) . ?
 O12 C35 1.357(7) . ?
 O12 C36 1.449(7) . ?
 O13 C37 1.401(8) . ?
 O13 C38 1.429(8) . ?
 O14 C39 1.387(9) . ?
 O14 C40 1.447(9) . ?
 C26 H26A 0.9900 . ?
 C26 H26B 0.9900 . ?
 C26 C27 1.476(10) . ?
 C27 H27A 0.9900 . ?
 C27 H27B 0.9900 . ?
 C28 H28A 0.9900 . ?
 C28 H28B 0.9900 . ?
 C28 C29 1.494(8) . ?
 C29 H29A 0.9900 . ?
 C29 H29B 0.9900 . ?
 C30 C31 1.363(9) . ?
 C30 C35 1.408(8) . ?
 C31 H31 0.9500 . ?
 C31 C32 1.394(9) . ?
 C32 H32 0.9500 . ?
 C32 C33 1.364(11) . ?
 C33 H33 0.9500 . ?
 C33 C34 1.393(11) . ?
 C34 H34 0.9500 . ?
 C34 C35 1.382(9) . ?
 C36 H36A 0.9900 . ?
 C36 H36B 0.9900 . ?
 C36 C37 1.477(10) . ?
 C37 H37A 0.9900 . ?
 C37 H37B 0.9900 . ?
 C38 H38A 0.9900 . ?
 C38 H38B 0.9900 . ?
 C38 C39 1.496(11) . ?
 C39 H39A 0.9900 . ?
 C39 H39B 0.9900 . ?
 C40 H40A 0.9900 . ?
 C40 H40B 0.9900 . ?
 C40 C41 1.475(12) . ?
 C41 H41A 0.9900 . ?
 C41 H41B 0.9900 . ?
 C41 C42 1.472(11) . ?
 C42 H42A 0.9900 . ?
 C42 H42B 0.9900 . ?
 C42 C43 1.541(11) . ?
 C43 H43A 0.9900 . ?
 C43 H43B 0.9900 . ?
 C43 C44 1.486(11) . ?
 C44 H44A 0.9900 . ?
 C44 H44B 0.9900 . ?
 C44 C45 1.498(11) . ?
 C45 H45A 0.9900 . ?
 C45 H45B 0.9900 . ?
 C45 C46 1.447(10) . ?
 C46 H46A 0.9900 . ?
 C46 H46B 0.9900 . ?
 C46 C47 1.490(10) . ?
 C47 H47A 0.9900 . ?
 C47 H47B 0.9900 . ?
 O101 C102 1.460(9) . ?
 O101 C103 1.345(9) . ?
 O102 C110 1.190(10) . ?
 O103 C110 1.333(9) . ?
 O103 C111 1.486(11) . ?
 O104 C103 1.197(10) . ?
 O105 C120 1.328(7) . ?
 O105 C121 1.471(7) . ?
 O106 C120 1.206(7) . ?
 O107 C123 1.334(7) . ?
 O107 C124 1.458(7) . ?
 O108 C123 1.220(7) . ?
 C101 H10A 0.9800 . ?
 C101 H10B 0.9800 . ?
 C101 H10C 0.9800 . ?
 C101 C102 1.510(10) . ?
 C102 H10D 0.9900 . ?
 C102 H10E 0.9900 . ?
 C103 C104 1.598(13) . ?
 C103 C218 1.233(14) . ?
 C110 C108 1.345(13) . ?
 C110 C216 1.856(15) . ?
 C111 H11A 0.9900 . ?
 C111 H11B 0.9900 . ?
 C111 C112 1.279(14) . ?
 C112 H11C 0.9800 . ?
 C112 H11D 0.9800 . ?
 C112 H11E 0.9800 . ?
 C114 C115 1.383(8) . ?
 C114 C119 1.383(8) . ?
 C114 C113 1.46(2) . ?
 C114 N201 1.47(3) . ?
 C115 H115 0.9500 . ?
 C115 C116 1.400(8) . ?
 C116 C117 1.379(7) . ?
 C116 C120 1.469(8) . ?
 C117 H117 0.9500 . ?
 C117 C118 1.388(8) . ?
 C118 C119 1.389(7) . ?
 C118 C123 1.471(8) . ?
 C119 H119 0.9500 . ?
 C121 H12A 0.9900 . ?
 C121 H12B 0.9900 . ?
 C121 C122 1.451(9) . ?
 C122 H12C 0.9800 . ?
 C122 H12D 0.9800 . ?
 C122 H12E 0.9800 . ?
 C124 H12F 0.9900 . ?
 C124 H12G 0.9900 . ?
 C124 C125 1.475(10) . ?
 C125 H12H 0.9800 . ?
 C125 H12I 0.9800 . ?
 C125 H12J 0.9800 . ?
 C113 H11F 0.9900 . ?
 C113 H11G 0.9900 . ?
 C113 N101 1.20(2) . ?
 N101 H101 0.8800 . ?
 N101 C106 1.430(11) . ?
 C104 C105 1.396(11) . ?
 C104 C109 1.387(13) . ?
 C105 H105 0.9500 . ?
 C105 C106 1.388(11) . ?
 C106 C107 1.385(12) . ?
 C107 H107 0.9500 . ?
 C107 C108 1.370(11) . ?
 C108 C109 1.378(13) . ?
 C109 H109 0.9500 . ?
 O109 C126 1.393(17) . ?
 O109 C147 1.428(15) . ?
 O110 C127 1.434(12) . ?
 O110 C128 1.394(17) . ?
 O111 C129 1.478(14) . ?
 O111 C130 1.373(11) . ?
 O112 C135 1.366(14) . ?
 O112 C136 1.471(13) . ?
 O113 C137 1.400(16) . ?
 O113 C138 1.386(18) . ?
 O114 C139 1.480(17) . ?
 O114 C140 1.308(16) . ?
 C126 H12K 0.9900 . ?
 C126 H12L 0.9900 . ?
 C126 C127 1.495(18) . ?
 C127 H12M 0.9900 . ?
 C127 H12N 0.9900 . ?
 C128 H12O 0.9900 . ?
 C128 H12P 0.9900 . ?
 C128 C129 1.51(2) . ?
 C129 H12Q 0.9900 . ?
 C129 H12R 0.9900 . ?
 C130 C131 1.351(17) . ?
 C130 C135 1.387(14) . ?
 C131 H131 0.9500 . ?
 C131 C132 1.43(2) . ?
 C132 H132 0.9500 . ?
 C132 C133 1.38(2) . ?
 C133 H133 0.9500 . ?
 C133 C134 1.37(2) . ?
 C134 H134 0.9500 . ?
 C134 C135 1.390(17) . ?
 C136 H13A 0.9900 . ?
 C136 H13B 0.9900 . ?
 C136 C137 1.288(15) . ?
 C137 H13C 0.9900 . ?
 C137 H13D 0.9900 . ?
 C138 H13E 0.9900 . ?
 C138 H13F 0.9900 . ?
 C138 C139 1.387(17) . ?
 C139 H13G 0.9900 . ?
 C139 H13H 0.9900 . ?
 C140 H14A 0.9900 . ?
 C140 H14B 0.9900 . ?
 C140 C141 1.554(19) . ?
 C141 H14C 0.9900 . ?
 C141 H14D 0.9900 . ?
 C141 C142 1.472(17) . ?
 C142 H14E 0.9900 . ?
 C142 H14F 0.9900 . ?
 C142 C143 1.477(18) . ?
 C143 H14G 0.9900 . ?
 C143 H14H 0.9900 . ?
 C143 C144 1.50(2) . ?
 C144 H14I 0.9900 . ?
 C144 H14J 0.9900 . ?
 C144 C145 1.506(18) . ?
 C145 H14K 0.9900 . ?
 C145 H14L 0.9900 . ?
 C145 C146 1.514(18) . ?
 C146 H14M 0.9900 . ?
 C146 H14N 0.9900 . ?
 C146 C147 1.486(19) . ?
 C147 H14O 0.9900 . ?
 C147 H14P 0.9900 . ?
 N201 H201 0.8800 . ?
 N201 C213 1.41(4) . ?
 C213 H21A 0.9900 . ?
 C213 H21B 0.9900 . ?
 C213 C214 1.48(3) . ?
 C214 C215 1.3900 . ?
 C214 C219 1.3900 . ?
 C215 H215 0.9500 . ?
 C215 C216 1.3900 . ?
 C216 C217 1.3900 . ?
 C217 H217 0.9500 . ?
 C217 C218 1.3900 . ?
 C218 C219 1.3900 . ?
 C219 H219 0.9500 . ?
 O209 C226 0.92(8) . ?
 O209 C247 1.57(5) . ?
 O210 C227 1.76(8) . ?
 O210 C228 1.33(9) . ?
 O211 C229 1.49(5) . ?
 O211 C230 1.34(3) . ?
 O212 C235 1.37(3) . ?
 O212 C236 1.40(4) . ?
 O213 C237 1.48(6) . ?
 O213 C238 1.45(4) . ?
 O214 C239 1.43(4) . ?
 O214 C240 1.33(6) . ?
 C226 H22A 0.9900 . ?
 C226 H22B 0.9900 . ?
 C226 C227 1.40(8) . ?
 C227 H22C 0.9900 . ?
 C227 H22D 0.9900 . ?
 C228 H22E 0.9900 . ?
 C228 H22F 0.9900 . ?
 C228 C229 1.66(8) . ?
 C229 H22G 0.9900 . ?
 C229 H22H 0.9900 . ?
 C230 C231 1.3900 . ?
 C230 C235 1.3900 . ?
 C231 H231 0.9500 . ?
 C231 C232 1.3900 . ?
 C232 H232 0.9500 . ?
 C232 C233 1.3900 . ?
 C233 H233 0.9500 . ?
 C233 C234 1.3900 . ?
 C234 H234 0.9500 . ?
 C234 C235 1.3900 . ?
 C236 H23A 0.9900 . ?
 C236 H23B 0.9900 . ?
 C236 C237 1.47(6) . ?
 C237 H23C 0.9900 . ?
 C237 H23D 0.9900 . ?
 C238 H23E 0.9900 . ?
 C238 H23F 0.9900 . ?
 C238 C239 1.52(5) . ?
 C239 H23G 0.9900 . ?
 C239 H23H 0.9900 . ?
 C240 H24A 0.9900 . ?
 C240 H24B 0.9900 . ?
 C240 C241 1.54(7) . ?
 C241 H24C 0.9900 . ?
 C241 H24D 0.9900 . ?
 C241 C242 1.31(6) . ?
 C242 H24E 0.9900 . ?
 C242 H24F 0.9900 . ?
 C242 C243 1.62(9) . ?
 C243 H24G 0.9900 . ?
 C243 H24H 0.9900 . ?
 C243 C244 1.48(8) . ?
 C244 H24I 0.9900 . ?
 C244 H24J 0.9900 . ?
 C244 C245 1.58(8) . ?
 C245 H24K 0.9900 . ?
 C245 H24L 0.9900 . ?
 C245 C246 1.31(8) . ?
 C246 H24M 0.9900 . ?
 C246 H24N 0.9900 . ?
 C246 C247 1.20(6) . ?
 C247 H24O 0.9900 . ?
 C247 H24P 0.9900 . ?

loop_
  _geom_angle_atom_site_label_1
  _geom_angle_atom_site_label_2
  _geom_angle_atom_site_label_3
  _geom_angle
  _geom_angle_site_symmetry_1
  _geom_angle_site_symmetry_3
  _geom_angle_publ_flag
 C3 O1 C2 116.3(6) . . ?
 C10 O3 C11 116.6(8) . . ?
 C20 O5 C21 117.0(7) . . ?
 C23 O7 C24 121.8(9) . . ?
 C6 N1 H1 119.7 . . ?
 C6 N1 C13 120.7(6) . . ?
 C13 N1 H1 119.7 . . ?
 H1A C1 H1B 109.5 . . ?
 H1A C1 H1C 109.5 . . ?
 H1B C1 H1C 109.5 . . ?
 C2 C1 H1A 109.5 . . ?
 C2 C1 H1B 109.5 . . ?
 C2 C1 H1C 109.5 . . ?
 O1 C2 H2A 110.1 . . ?
 O1 C2 H2B 110.1 . . ?
 C1 C2 O1 108.1(8) . . ?
 C1 C2 H2A 110.1 . . ?
 C1 C2 H2B 110.1 . . ?
 H2A C2 H2B 108.4 . . ?
 O1 C3 C4 111.4(7) . . ?
 O2 C3 O1 123.6(7) . . ?
 O2 C3 C4 125.0(7) . . ?
 C5 C4 C3 118.4(6) . . ?
 C9 C4 C3 122.4(6) . . ?
 C9 C4 C5 119.2(6) . . ?
 C4 C5 H5 119.5 . . ?
 C4 C5 C6 121.0(6) . . ?
 C6 C5 H5 119.5 . . ?
 N1 C6 C5 123.1(6) . . ?
 C7 C6 N1 118.4(6) . . ?
 C7 C6 C5 118.4(6) . . ?
 C6 C7 H7 119.6 . . ?
 C8 C7 C6 120.8(6) . . ?
 C8 C7 H7 119.6 . . ?
 C7 C8 C9 120.2(7) . . ?
 C7 C8 C10 123.3(7) . . ?
 C9 C8 C10 116.5(7) . . ?
 C4 C9 C8 120.3(6) . . ?
 C4 C9 H9 119.9 . . ?
 C8 C9 H9 119.9 . . ?
 O3 C10 C8 111.5(7) . . ?
 O4 C10 O3 122.9(8) . . ?
 O4 C10 C8 125.5(8) . . ?
 O3 C11 H11H 109.2 . . ?
 O3 C11 H11I 109.2 . . ?
 H11H C11 H11I 107.9 . . ?
 C12 C11 O3 111.9(11) . . ?
 C12 C11 H11H 109.2 . . ?
 C12 C11 H11I 109.2 . . ?
 C11 C12 H12S 109.5 . . ?
 C11 C12 H12T 109.5 . . ?
 C11 C12 H12U 109.5 . . ?
 H12S C12 H12T 109.5 . . ?
 H12S C12 H12U 109.5 . . ?
 H12T C12 H12U 109.5 . . ?
 N1 C13 H13I 109.0 . . ?
 N1 C13 H13J 109.0 . . ?
 N1 C13 C14 112.9(5) . . ?
 H13I C13 H13J 107.8 . . ?
 C14 C13 H13I 109.0 . . ?
 C14 C13 H13J 109.0 . . ?
 C15 C14 C13 120.0(6) . . ?
 C15 C14 C19 118.3(6) . . ?
 C19 C14 C13 121.6(6) . . ?
 C14 C15 H15 119.6 . . ?
 C14 C15 C16 120.8(6) . . ?
 C16 C15 H15 119.6 . . ?
 C15 C16 C20 121.8(6) . . ?
 C17 C16 C15 119.7(6) . . ?
 C17 C16 C20 118.5(6) . . ?
 C16 C17 H17 119.6 . . ?
 C16 C17 C18 120.8(6) . . ?
 C18 C17 H17 119.6 . . ?
 C17 C18 C19 119.0(6) . . ?
 C17 C18 C23 119.6(7) . . ?
 C19 C18 C23 121.4(7) . . ?
 C14 C19 C18 121.4(6) . . ?
 C14 C19 H19 119.3 . . ?
 C18 C19 H19 119.3 . . ?
 O5 C20 C16 112.6(7) . . ?
 O6 C20 O5 123.7(7) . . ?
 O6 C20 C16 123.7(8) . . ?
 O5 C21 H21C 111.2 . . ?
 O5 C21 H21D 111.2 . . ?
 H21C C21 H21D 109.1 . . ?
 C22 C21 O5 102.7(9) . . ?
 C22 C21 H21C 111.2 . . ?
 C22 C21 H21D 111.2 . . ?
 C21 C22 H22I 109.5 . . ?
 C21 C22 H22J 109.5 . . ?
 C21 C22 H22K 109.5 . . ?
 H22I C22 H22J 109.5 . . ?
 H22I C22 H22K 109.5 . . ?
 H22J C22 H22K 109.5 . . ?
 O7 C23 C18 113.6(8) . . ?
 O8 C23 O7 123.6(9) . . ?
 O8 C23 C18 122.8(9) . . ?
 O7 C24 H24Q 112.9 . . ?
 O7 C24 H24R 112.9 . . ?
 H24Q C24 H24R 110.3 . . ?
 C25 C24 O7 94(2) . . ?
 C25 C24 H24Q 112.9 . . ?
 C25 C24 H24R 112.9 . . ?
 C24 C25 H25A 109.5 . . ?
 C24 C25 H25B 109.5 . . ?
 C24 C25 H25C 109.5 . . ?
 H25A C25 H25B 109.5 . . ?
 H25A C25 H25C 109.5 . . ?
 H25B C25 H25C 109.5 . . ?
 C47 O9 C26 112.9(6) . . ?
 C28 O10 C27 111.6(5) . . ?
 C30 O11 C29 115.8(4) . . ?
 C35 O12 C36 117.5(5) . . ?
 C37 O13 C38 110.2(6) . . ?
 C39 O14 C40 111.7(6) . . ?
 O9 C26 H26A 109.8 . . ?
 O9 C26 H26B 109.8 . . ?
 O9 C26 C27 109.3(6) . . ?
 H26A C26 H26B 108.3 . . ?
 C27 C26 H26A 109.8 . . ?
 C27 C26 H26B 109.8 . . ?
 O10 C27 C26 111.6(6) . . ?
 O10 C27 H27A 109.3 . . ?
 O10 C27 H27B 109.3 . . ?
 C26 C27 H27A 109.3 . . ?
 C26 C27 H27B 109.3 . . ?
 H27A C27 H27B 108.0 . . ?
 O10 C28 H28A 109.5 . . ?
 O10 C28 H28B 109.5 . . ?
 O10 C28 C29 110.8(5) . . ?
 H28A C28 H28B 108.1 . . ?
 C29 C28 H28A 109.5 . . ?
 C29 C28 H28B 109.5 . . ?
 O11 C29 C28 110.7(5) . . ?
 O11 C29 H29A 109.5 . . ?
 O11 C29 H29B 109.5 . . ?
 C28 C29 H29A 109.5 . . ?
 C28 C29 H29B 109.5 . . ?
 H29A C29 H29B 108.1 . . ?
 O11 C30 C35 115.4(6) . . ?
 C31 C30 O11 124.3(6) . . ?
 C31 C30 C35 120.3(6) . . ?
 C30 C31 H31 120.1 . . ?
 C30 C31 C32 119.8(7) . . ?
 C32 C31 H31 120.1 . . ?
 C31 C32 H32 119.6 . . ?
 C33 C32 C31 120.7(7) . . ?
 C33 C32 H32 119.6 . . ?
 C32 C33 H33 120.2 . . ?
 C32 C33 C34 119.6(7) . . ?
 C34 C33 H33 120.2 . . ?
 C33 C34 H34 119.8 . . ?
 C35 C34 C33 120.5(7) . . ?
 C35 C34 H34 119.8 . . ?
 O12 C35 C30 116.7(5) . . ?
 O12 C35 C34 124.4(6) . . ?
 C34 C35 C30 118.9(7) . . ?
 O12 C36 H36A 109.8 . . ?
 O12 C36 H36B 109.8 . . ?
 O12 C36 C37 109.5(6) . . ?
 H36A C36 H36B 108.2 . . ?
 C37 C36 H36A 109.8 . . ?
 C37 C36 H36B 109.8 . . ?
 O13 C37 C36 111.3(6) . . ?
 O13 C37 H37A 109.4 . . ?
 O13 C37 H37B 109.4 . . ?
 C36 C37 H37A 109.4 . . ?
 C36 C37 H37B 109.4 . . ?
 H37A C37 H37B 108.0 . . ?
 O13 C38 H38A 109.4 . . ?
 O13 C38 H38B 109.4 . . ?
 O13 C38 C39 111.0(6) . . ?
 H38A C38 H38B 108.0 . . ?
 C39 C38 H38A 109.4 . . ?
 C39 C38 H38B 109.4 . . ?
 O14 C39 C38 112.9(6) . . ?
 O14 C39 H39A 109.0 . . ?
 O14 C39 H39B 109.0 . . ?
 C38 C39 H39A 109.0 . . ?
 C38 C39 H39B 109.0 . . ?
 H39A C39 H39B 107.8 . . ?
 O14 C40 H40A 109.3 . . ?
 O14 C40 H40B 109.3 . . ?
 O14 C40 C41 111.6(7) . . ?
 H40A C40 H40B 108.0 . . ?
 C41 C40 H40A 109.3 . . ?
 C41 C40 H40B 109.3 . . ?
 C40 C41 H41A 108.7 . . ?
 C40 C41 H41B 108.7 . . ?
 H41A C41 H41B 107.6 . . ?
 C42 C41 C40 114.3(8) . . ?
 C42 C41 H41A 108.7 . . ?
 C42 C41 H41B 108.7 . . ?
 C41 C42 H42A 108.9 . . ?
 C41 C42 H42B 108.9 . . ?
 C41 C42 C43 113.4(8) . . ?
 H42A C42 H42B 107.7 . . ?
 C43 C42 H42A 108.9 . . ?
 C43 C42 H42B 108.9 . . ?
 C42 C43 H43A 109.0 . . ?
 C42 C43 H43B 109.0 . . ?
 H43A C43 H43B 107.8 . . ?
 C44 C43 C42 112.8(7) . . ?
 C44 C43 H43A 109.0 . . ?
 C44 C43 H43B 109.0 . . ?
 C43 C44 H44A 108.8 . . ?
 C43 C44 H44B 108.8 . . ?
 C43 C44 C45 113.7(8) . . ?
 H44A C44 H44B 107.7 . . ?
 C45 C44 H44A 108.8 . . ?
 C45 C44 H44B 108.8 . . ?
 C44 C45 H45A 107.7 . . ?
 C44 C45 H45B 107.7 . . ?
 H45A C45 H45B 107.1 . . ?
 C46 C45 C44 118.4(7) . . ?
 C46 C45 H45A 107.7 . . ?
 C46 C45 H45B 107.7 . . ?
 C45 C46 H46A 108.6 . . ?
 C45 C46 H46B 108.6 . . ?
 C45 C46 C47 114.7(7) . . ?
 H46A C46 H46B 107.6 . . ?
 C47 C46 H46A 108.6 . . ?
 C47 C46 H46B 108.6 . . ?
 O9 C47 C46 111.7(6) . . ?
 O9 C47 H47A 109.3 . . ?
 O9 C47 H47B 109.3 . . ?
 C46 C47 H47A 109.3 . . ?
 C46 C47 H47B 109.3 . . ?
 H47A C47 H47B 107.9 . . ?
 C103 O101 C102 114.3(6) . . ?
 C110 O103 C111 116.4(8) . . ?
 C120 O105 C121 116.4(5) . . ?
 C123 O107 C124 118.1(5) . . ?
 H10A C101 H10B 109.5 . . ?
 H10A C101 H10C 109.5 . . ?
 H10B C101 H10C 109.5 . . ?
 C102 C101 H10A 109.5 . . ?
 C102 C101 H10B 109.5 . . ?
 C102 C101 H10C 109.5 . . ?
 O101 C102 C101 107.0(7) . . ?
 O101 C102 H10D 110.3 . . ?
 O101 C102 H10E 110.3 . . ?
 C101 C102 H10D 110.3 . . ?
 C101 C102 H10E 110.3 . . ?
 H10D C102 H10E 108.6 . . ?
 O101 C103 C104 110.2(8) . . ?
 O104 C103 O101 123.2(8) . . ?
 O104 C103 C104 126.4(8) . . ?
 O104 C103 C218 113.9(11) . . ?
 C218 C103 O101 121.4(11) . . ?
 O102 C110 O103 121.5(9) . . ?
 O102 C110 C108 127.5(9) . . ?
 O102 C110 C216 125.3(9) . . ?
 O103 C110 C108 110.9(8) . . ?
 O103 C110 C216 112.5(9) . . ?
 O103 C111 H11A 109.6 . . ?
 O103 C111 H11B 109.6 . . ?
 H11A C111 H11B 108.1 . . ?
 C112 C111 O103 110.1(11) . . ?
 C112 C111 H11A 109.6 . . ?
 C112 C111 H11B 109.6 . . ?
 C111 C112 H11C 109.5 . . ?
 C111 C112 H11D 109.5 . . ?
 C111 C112 H11E 109.5 . . ?
 H11C C112 H11D 109.5 . . ?
 H11C C112 H11E 109.5 . . ?
 H11D C112 H11E 109.5 . . ?
 C115 C114 C119 118.9(5) . . ?
 C115 C114 C113 122.0(10) . . ?
 C115 C114 N201 117.5(13) . . ?
 C119 C114 C113 118.8(10) . . ?
 C119 C114 N201 123.1(12) . . ?
 C114 C115 H115 119.6 . . ?
 C114 C115 C116 120.9(5) . . ?
 C116 C115 H115 119.6 . . ?
 C115 C116 C120 121.9(5) . . ?
 C117 C116 C115 119.1(5) . . ?
 C117 C116 C120 119.0(5) . . ?
 C116 C117 H117 119.6 . . ?
 C116 C117 C118 120.8(5) . . ?
 C118 C117 H117 119.6 . . ?
 C117 C118 C119 119.1(5) . . ?
 C117 C118 C123 118.9(5) . . ?
 C119 C118 C123 122.0(5) . . ?
 C114 C119 C118 121.2(5) . . ?
 C114 C119 H119 119.4 . . ?
 C118 C119 H119 119.4 . . ?
 O105 C120 C116 113.1(5) . . ?
 O106 C120 O105 122.3(6) . . ?
 O106 C120 C116 124.6(6) . . ?
 O105 C121 H12A 110.1 . . ?
 O105 C121 H12B 110.1 . . ?
 H12A C121 H12B 108.4 . . ?
 C122 C121 O105 108.2(6) . . ?
 C122 C121 H12A 110.1 . . ?
 C122 C121 H12B 110.1 . . ?
 C121 C122 H12C 109.5 . . ?
 C121 C122 H12D 109.5 . . ?
 C121 C122 H12E 109.5 . . ?
 H12C C122 H12D 109.5 . . ?
 H12C C122 H12E 109.5 . . ?
 H12D C122 H12E 109.5 . . ?
 O107 C123 C118 113.6(5) . . ?
 O108 C123 O107 123.1(6) . . ?
 O108 C123 C118 123.2(6) . . ?
 O107 C124 H12F 109.5 . . ?
 O107 C124 H12G 109.5 . . ?
 O107 C124 C125 110.7(7) . . ?
 H12F C124 H12G 108.1 . . ?
 C125 C124 H12F 109.5 . . ?
 C125 C124 H12G 109.5 . . ?
 C124 C125 H12H 109.5 . . ?
 C124 C125 H12I 109.5 . . ?
 C124 C125 H12J 109.5 . . ?
 H12H C125 H12I 109.5 . . ?
 H12H C125 H12J 109.5 . . ?
 H12I C125 H12J 109.5 . . ?
 C114 C113 H11F 106.5 . . ?
 C114 C113 H11G 106.5 . . ?
 H11F C113 H11G 106.5 . . ?
 N101 C113 C114 123.4(18) . . ?
 N101 C113 H11F 106.5 . . ?
 N101 C113 H11G 106.5 . . ?
 C113 N101 H101 115.6 . . ?
 C113 N101 C106 128.7(13) . . ?
 C106 N101 H101 115.6 . . ?
 C105 C104 C103 116.7(8) . . ?
 C109 C104 C103 123.1(7) . . ?
 C109 C104 C105 120.1(8) . . ?
 C104 C105 H105 120.4 . . ?
 C106 C105 C104 119.2(8) . . ?
 C106 C105 H105 120.4 . . ?
 C105 C106 N101 123.8(8) . . ?
 C107 C106 N101 117.5(8) . . ?
 C107 C106 C105 118.7(7) . . ?
 C106 C107 H107 118.5 . . ?
 C108 C107 C106 123.0(9) . . ?
 C108 C107 H107 118.5 . . ?
 C110 C108 C107 124.6(9) . . ?
 C110 C108 C109 117.4(9) . . ?
 C107 C108 C109 118.0(10) . . ?
 C104 C109 H109 119.5 . . ?
 C108 C109 C104 121.0(8) . . ?
 C108 C109 H109 119.5 . . ?
 C126 O109 C147 112.6(10) . . ?
 C128 O110 C127 110.2(9) . . ?
 C130 O111 C129 117.6(9) . . ?
 C135 O112 C136 124.3(8) . . ?
 C138 O113 C137 119.0(10) . . ?
 C140 O114 C139 110.8(11) . . ?
 O109 C126 H12K 108.7 . . ?
 O109 C126 H12L 108.7 . . ?
 O109 C126 C127 114.3(12) . . ?
 H12K C126 H12L 107.6 . . ?
 C127 C126 H12K 108.7 . . ?
 C127 C126 H12L 108.7 . . ?
 O110 C127 C126 111.5(9) . . ?
 O110 C127 H12M 109.3 . . ?
 O110 C127 H12N 109.3 . . ?
 C126 C127 H12M 109.3 . . ?
 C126 C127 H12N 109.3 . . ?
 H12M C127 H12N 108.0 . . ?
 O110 C128 H12O 109.3 . . ?
 O110 C128 H12P 109.3 . . ?
 O110 C128 C129 111.6(11) . . ?
 H12O C128 H12P 108.0 . . ?
 C129 C128 H12O 109.3 . . ?
 C129 C128 H12P 109.3 . . ?
 O111 C129 C128 106.6(11) . . ?
 O111 C129 H12Q 110.4 . . ?
 O111 C129 H12R 110.4 . . ?
 C128 C129 H12Q 110.4 . . ?
 C128 C129 H12R 110.4 . . ?
 H12Q C129 H12R 108.6 . . ?
 O111 C130 C135 115.2(9) . . ?
 C131 C130 O111 124.0(10) . . ?
 C131 C130 C135 120.7(11) . . ?
 C130 C131 H131 120.1 . . ?
 C130 C131 C132 119.8(13) . . ?
 C132 C131 H131 120.1 . . ?
 C131 C132 H132 120.7 . . ?
 C133 C132 C131 118.6(13) . . ?
 C133 C132 H132 120.7 . . ?
 C132 C133 H133 119.5 . . ?
 C134 C133 C132 121.0(13) . . ?
 C134 C133 H133 119.5 . . ?
 C133 C134 H134 120.1 . . ?
 C133 C134 C135 119.7(13) . . ?
 C135 C134 H134 120.1 . . ?
 O112 C135 C130 117.1(9) . . ?
 O112 C135 C134 122.9(11) . . ?
 C130 C135 C134 120.0(12) . . ?
 O112 C136 H13A 108.2 . . ?
 O112 C136 H13B 108.2 . . ?
 H13A C136 H13B 107.4 . . ?
 C137 C136 O112 116.3(12) . . ?
 C137 C136 H13A 108.2 . . ?
 C137 C136 H13B 108.2 . . ?
 O113 C137 H13C 108.6 . . ?
 O113 C137 H13D 108.6 . . ?
 C136 C137 O113 114.7(12) . . ?
 C136 C137 H13C 108.6 . . ?
 C136 C137 H13D 108.6 . . ?
 H13C C137 H13D 107.6 . . ?
 O113 C138 H13E 109.5 . . ?
 O113 C138 H13F 109.5 . . ?
 O113 C138 C139 110.8(12) . . ?
 H13E C138 H13F 108.1 . . ?
 C139 C138 H13E 109.5 . . ?
 C139 C138 H13F 109.5 . . ?
 O114 C139 H13G 109.4 . . ?
 O114 C139 H13H 109.4 . . ?
 C138 C139 O114 111.3(11) . . ?
 C138 C139 H13G 109.4 . . ?
 C138 C139 H13H 109.4 . . ?
 H13G C139 H13H 108.0 . . ?
 O114 C140 H14A 109.8 . . ?
 O114 C140 H14B 109.8 . . ?
 O114 C140 C141 109.4(11) . . ?
 H14A C140 H14B 108.2 . . ?
 C141 C140 H14A 109.8 . . ?
 C141 C140 H14B 109.8 . . ?
 C140 C141 H14C 108.4 . . ?
 C140 C141 H14D 108.4 . . ?
 H14C C141 H14D 107.5 . . ?
 C142 C141 C140 115.5(12) . . ?
 C142 C141 H14C 108.4 . . ?
 C142 C141 H14D 108.4 . . ?
 C141 C142 H14E 107.6 . . ?
 C141 C142 H14F 107.6 . . ?
 C141 C142 C143 118.7(13) . . ?
 H14E C142 H14F 107.1 . . ?
 C143 C142 H14E 107.6 . . ?
 C143 C142 H14F 107.6 . . ?
 C142 C143 H14G 107.7 . . ?
 C142 C143 H14H 107.7 . . ?
 C142 C143 C144 118.6(12) . . ?
 H14G C143 H14H 107.1 . . ?
 C144 C143 H14G 107.7 . . ?
 C144 C143 H14H 107.7 . . ?
 C143 C144 H14I 108.7 . . ?
 C143 C144 H14J 108.7 . . ?
 C143 C144 C145 114.3(12) . . ?
 H14I C144 H14J 107.6 . . ?
 C145 C144 H14I 108.7 . . ?
 C145 C144 H14J 108.7 . . ?
 C144 C145 H14K 109.1 . . ?
 C144 C145 H14L 109.1 . . ?
 C144 C145 C146 112.4(11) . . ?
 H14K C145 H14L 107.9 . . ?
 C146 C145 H14K 109.1 . . ?
 C146 C145 H14L 109.1 . . ?
 C145 C146 H14M 107.8 . . ?
 C145 C146 H14N 107.8 . . ?
 H14M C146 H14N 107.2 . . ?
 C147 C146 C145 117.9(10) . . ?
 C147 C146 H14M 107.8 . . ?
 C147 C146 H14N 107.8 . . ?
 O109 C147 C146 112.3(11) . . ?
 O109 C147 H14O 109.1 . . ?
 O109 C147 H14P 109.1 . . ?
 C146 C147 H14O 109.1 . . ?
 C146 C147 H14P 109.1 . . ?
 H14O C147 H14P 107.9 . . ?
 C114 N201 H201 123.1 . . ?
 C213 N201 C114 114(2) . . ?
 C213 N201 H201 123.1 . . ?
 N201 C213 H21A 107.7 . . ?
 N201 C213 H21B 107.7 . . ?
 N201 C213 C214 118(2) . . ?
 H21A C213 H21B 107.1 . . ?
 C214 C213 H21A 107.7 . . ?
 C214 C213 H21B 107.7 . . ?
 C215 C214 C213 121.4(15) . . ?
 C215 C214 C219 120.0 . . ?
 C219 C214 C213 118.6(15) . . ?
 C214 C215 H215 120.0 . . ?
 C214 C215 C216 120.0 . . ?
 C216 C215 H215 120.0 . . ?
 C215 C216 C110 122.4(10) . . ?
 C217 C216 C110 117.6(10) . . ?
 C217 C216 C215 120.0 . . ?
 C216 C217 H217 120.0 . . ?
 C216 C217 C218 120.0 . . ?
 C218 C217 H217 120.0 . . ?
 C103 C218 C217 112.7(13) . . ?
 C103 C218 C219 125.7(13) . . ?
 C219 C218 C217 120.0 . . ?
 C214 C219 H219 120.0 . . ?
 C218 C219 C214 120.0 . . ?
 C218 C219 H219 120.0 . . ?
 C226 O209 C247 128(7) . . ?
 C228 O210 C227 89(5) . . ?
 C230 O211 C229 119(3) . . ?
 C235 O212 C236 120(3) . . ?
 C238 O213 C237 107(3) . . ?
 C240 O214 C239 115(4) . . ?
 O209 C226 H22A 107.2 . . ?
 O209 C226 H22B 107.2 . . ?
 O209 C226 C227 120(7) . . ?
 H22A C226 H22B 106.9 . . ?
 C227 C226 H22A 107.2 . . ?
 C227 C226 H22B 107.2 . . ?
 O210 C227 H22C 111.6 . . ?
 O210 C227 H22D 111.6 . . ?
 C226 C227 O210 101(5) . . ?
 C226 C227 H22C 111.6 . . ?
 C226 C227 H22D 111.6 . . ?
 H22C C227 H22D 109.4 . . ?
 O210 C228 H22E 106.9 . . ?
 O210 C228 H22F 106.9 . . ?
 O210 C228 C229 122(6) . . ?
 H22E C228 H22F 106.7 . . ?
 C229 C228 H22E 106.9 . . ?
 C229 C228 H22F 106.9 . . ?
 O211 C229 C228 104(4) . . ?
 O211 C229 H22G 110.9 . . ?
 O211 C229 H22H 110.9 . . ?
 C228 C229 H22G 110.9 . . ?
 C228 C229 H22H 110.9 . . ?
 H22G C229 H22H 108.9 . . ?
 O211 C230 C231 126(2) . . ?
 O211 C230 C235 114(2) . . ?
 C231 C230 C235 120.0 . . ?
 C230 C231 H231 120.0 . . ?
 C232 C231 C230 120.0 . . ?
 C232 C231 H231 120.0 . . ?
 C231 C232 H232 120.0 . . ?
 C231 C232 C233 120.0 . . ?
 C233 C232 H232 120.0 . . ?
 C232 C233 H233 120.0 . . ?
 C232 C233 C234 120.0 . . ?
 C234 C233 H233 120.0 . . ?
 C233 C234 H234 120.0 . . ?
 C235 C234 C233 120.0 . . ?
 C235 C234 H234 120.0 . . ?
 O212 C235 C230 125(2) . . ?
 O212 C235 C234 115(2) . . ?
 C234 C235 C230 120.0 . . ?
 O212 C236 H23A 107.9 . . ?
 O212 C236 H23B 107.9 . . ?
 O212 C236 C237 118(4) . . ?
 H23A C236 H23B 107.2 . . ?
 C237 C236 H23A 107.9 . . ?
 C237 C236 H23B 107.9 . . ?
 O213 C237 H23C 110.3 . . ?
 O213 C237 H23D 110.3 . . ?
 C236 C237 O213 107(4) . . ?
 C236 C237 H23C 110.3 . . ?
 C236 C237 H23D 110.3 . . ?
 H23C C237 H23D 108.6 . . ?
 O213 C238 H23E 110.3 . . ?
 O213 C238 H23F 110.3 . . ?
 O213 C238 C239 107(3) . . ?
 H23E C238 H23F 108.5 . . ?
 C239 C238 H23E 110.3 . . ?
 C239 C238 H23F 110.3 . . ?
 O214 C239 C238 115(3) . . ?
 O214 C239 H23G 108.5 . . ?
 O214 C239 H23H 108.5 . . ?
 C238 C239 H23G 108.5 . . ?
 C238 C239 H23H 108.5 . . ?
 H23G C239 H23H 107.5 . . ?
 O214 C240 H24A 108.9 . . ?
 O214 C240 H24B 108.9 . . ?
 O214 C240 C241 113(5) . . ?
 H24A C240 H24B 107.8 . . ?
 C241 C240 H24A 108.9 . . ?
 C241 C240 H24B 108.9 . . ?
 C240 C241 H24C 103.9 . . ?
 C240 C241 H24D 103.9 . . ?
 H24C C241 H24D 105.4 . . ?
 C242 C241 C240 133(6) . . ?
 C242 C241 H24C 103.9 . . ?
 C242 C241 H24D 103.9 . . ?
 C241 C242 H24E 105.8 . . ?
 C241 C242 H24F 105.8 . . ?
 C241 C242 C243 126(5) . . ?
 H24E C242 H24F 106.2 . . ?
 C243 C242 H24E 105.8 . . ?
 C243 C242 H24F 105.8 . . ?
 C242 C243 H24G 105.5 . . ?
 C242 C243 H24H 105.5 . . ?
 H24G C243 H24H 106.0 . . ?
 C244 C243 C242 127(7) . . ?
 C244 C243 H24G 105.5 . . ?
 C244 C243 H24H 105.5 . . ?
 C243 C244 H24I 110.5 . . ?
 C243 C244 H24J 110.5 . . ?
 C243 C244 C245 106(7) . . ?
 H24I C244 H24J 108.7 . . ?
 C245 C244 H24I 110.5 . . ?
 C245 C244 H24J 110.5 . . ?
 C244 C245 H24K 107.8 . . ?
 C244 C245 H24L 107.8 . . ?
 H24K C245 H24L 107.1 . . ?
 C246 C245 C244 118(6) . . ?
 C246 C245 H24K 107.8 . . ?
 C246 C245 H24L 107.8 . . ?
 C245 C246 H24M 109.7 . . ?
 C245 C246 H24N 109.7 . . ?
 H24M C246 H24N 108.2 . . ?
 C247 C246 C245 110(6) . . ?
 C247 C246 H24M 109.7 . . ?
 C247 C246 H24N 109.7 . . ?
 O209 C247 H24O 109.1 . . ?
 O209 C247 H24P 109.1 . . ?
 C246 C247 O209 112(4) . . ?
 C246 C247 H24O 109.1 . . ?
 C246 C247 H24P 109.1 . . ?
 H24O C247 H24P 107.9 . . ?

loop_
  _geom_torsion_atom_site_label_1
  _geom_torsion_atom_site_label_2
  _geom_torsion_atom_site_label_3
  _geom_torsion_atom_site_label_4
  _geom_torsion
  _geom_torsion_site_symmetry_1
  _geom_torsion_site_symmetry_2
  _geom_torsion_site_symmetry_3
  _geom_torsion_site_symmetry_4
  _geom_torsion_publ_flag
 O1 C3 C4 C5 172.6(6) . . . . ?
 O1 C3 C4 C9 -6.2(9) . . . . ?
 O2 C3 C4 C5 -7.4(10) . . . . ?
 O2 C3 C4 C9 173.7(7) . . . . ?
 N1 C6 C7 C8 -173.1(6) . . . . ?
 N1 C13 C14 C15 -117.8(6) . . . . ?
 N1 C13 C14 C19 65.6(8) . . . . ?
 C2 O1 C3 O2 3.9(11) . . . . ?
 C2 O1 C3 C4 -176.1(6) . . . . ?
 C3 O1 C2 C1 168.3(10) . . . . ?
 C3 C4 C5 C6 -177.4(6) . . . . ?
 C3 C4 C9 C8 178.8(6) . . . . ?
 C4 C5 C6 N1 173.1(6) . . . . ?
 C4 C5 C6 C7 -3.1(9) . . . . ?
 C5 C4 C9 C8 0.0(9) . . . . ?
 C5 C6 C7 C8 3.2(10) . . . . ?
 C6 N1 C13 C14 -170.3(6) . . . . ?
 C6 C7 C8 C9 -1.9(10) . . . . ?
 C6 C7 C8 C10 176.3(7) . . . . ?
 C7 C8 C9 C4 0.2(10) . . . . ?
 C7 C8 C10 O3 8.5(11) . . . . ?
 C7 C8 C10 O4 -170.2(8) . . . . ?
 C9 C4 C5 C6 1.5(9) . . . . ?
 C9 C8 C10 O3 -173.2(7) . . . . ?
 C9 C8 C10 O4 8.1(12) . . . . ?
 C10 O3 C11 C12 153.2(13) . . . . ?
 C10 C8 C9 C4 -178.1(6) . . . . ?
 C11 O3 C10 O4 -0.9(13) . . . . ?
 C11 O3 C10 C8 -179.6(8) . . . . ?
 C13 N1 C6 C5 9.3(10) . . . . ?
 C13 N1 C6 C7 -174.5(6) . . . . ?
 C13 C14 C15 C16 -177.0(5) . . . . ?
 C13 C14 C19 C18 177.5(6) . . . . ?
 C14 C15 C16 C17 -0.8(9) . . . . ?
 C14 C15 C16 C20 176.5(6) . . . . ?
 C15 C14 C19 C18 0.8(9) . . . . ?
 C15 C16 C17 C18 1.2(9) . . . . ?
 C15 C16 C20 O5 -8.2(10) . . . . ?
 C15 C16 C20 O6 172.9(8) . . . . ?
 C16 C17 C18 C19 -0.7(10) . . . . ?
 C16 C17 C18 C23 178.0(7) . . . . ?
 C17 C16 C20 O5 169.1(7) . . . . ?
 C17 C16 C20 O6 -9.8(12) . . . . ?
 C17 C18 C19 C14 -0.3(10) . . . . ?
 C17 C18 C23 O7 -179.6(7) . . . . ?
 C17 C18 C23 O8 1.6(14) . . . . ?
 C19 C14 C15 C16 -0.2(9) . . . . ?
 C19 C18 C23 O7 -0.9(12) . . . . ?
 C19 C18 C23 O8 -179.8(9) . . . . ?
 C20 O5 C21 C22 -123.3(10) . . . . ?
 C20 C16 C17 C18 -176.1(6) . . . . ?
 C21 O5 C20 O6 8.6(14) . . . . ?
 C21 O5 C20 C16 -170.3(7) . . . . ?
 C23 O7 C24 C25 -82(2) . . . . ?
 C23 C18 C19 C14 -179.0(7) . . . . ?
 C24 O7 C23 O8 6.2(18) . . . . ?
 C24 O7 C23 C18 -172.7(11) . . . . ?
 O9 C26 C27 O10 74.3(7) . . . . ?
 O10 C28 C29 O11 -75.3(6) . . . . ?
 O11 C30 C31 C32 176.8(6) . . . . ?
 O11 C30 C35 O12 2.9(8) . . . . ?
 O11 C30 C35 C34 -175.6(5) . . . . ?
 O12 C36 C37 O13 80.6(7) . . . . ?
 O13 C38 C39 O14 -72.3(8) . . . . ?
 O14 C40 C41 C42 -70.6(9) . . . . ?
 C26 O9 C47 C46 178.0(6) . . . . ?
 C27 O10 C28 C29 -168.5(5) . . . . ?
 C28 O10 C27 C26 178.9(5) . . . . ?
 C29 O11 C30 C31 -16.5(8) . . . . ?
 C29 O11 C30 C35 162.4(5) . . . . ?
 C30 O11 C29 C28 -168.2(5) . . . . ?
 C30 C31 C32 C33 -1.2(11) . . . . ?
 C31 C30 C35 O12 -178.1(5) . . . . ?
 C31 C30 C35 C34 3.3(9) . . . . ?
 C31 C32 C33 C34 3.2(12) . . . . ?
 C32 C33 C34 C35 -1.8(12) . . . . ?
 C33 C34 C35 O12 -179.8(6) . . . . ?
 C33 C34 C35 C30 -1.4(10) . . . . ?
 C35 O12 C36 C37 -177.7(5) . . . . ?
 C35 C30 C31 C32 -2.0(10) . . . . ?
 C36 O12 C35 C30 -175.8(5) . . . . ?
 C36 O12 C35 C34 2.7(8) . . . . ?
 C37 O13 C38 C39 -174.9(6) . . . . ?
 C38 O13 C37 C36 171.7(5) . . . . ?
 C39 O14 C40 C41 180.0(7) . . . . ?
 C40 O14 C39 C38 -178.6(6) . . . . ?
 C40 C41 C42 C43 -168.6(7) . . . . ?
 C41 C42 C43 C44 -168.3(7) . . . . ?
 C42 C43 C44 C45 98.1(10) . . . . ?
 C43 C44 C45 C46 -55.5(12) . . . . ?
 C44 C45 C46 C47 170.8(8) . . . . ?
 C45 C46 C47 O9 172.2(7) . . . . ?
 C47 O9 C26 C27 170.8(6) . . . . ?
 O101 C103 C104 C105 -172.5(7) . . . . ?
 O101 C103 C104 C109 10.2(12) . . . . ?
 O101 C103 C218 C217 -17.7(17) . . . . ?
 O101 C103 C218 C219 177.0(10) . . . . ?
 O102 C110 C108 C107 161.3(10) . . . . ?
 O102 C110 C108 C109 -16.9(15) . . . . ?
 O102 C110 C216 C215 175.8(11) . . . . ?
 O102 C110 C216 C217 -2.3(16) . . . . ?
 O103 C110 C108 C107 -16.5(14) . . . . ?
 O103 C110 C108 C109 165.3(8) . . . . ?
 O103 C110 C216 C215 -13.7(15) . . . . ?
 O103 C110 C216 C217 168.2(9) . . . . ?
 O104 C103 C104 C105 1.9(14) . . . . ?
 O104 C103 C104 C109 -175.4(10) . . . . ?
 O104 C103 C218 C217 176.3(10) . . . . ?
 O104 C103 C218 C219 11(2) . . . . ?
 C102 O101 C103 O104 -3.1(13) . . . . ?
 C102 O101 C103 C104 171.5(7) . . . . ?
 C102 O101 C103 C218 -167.8(13) . . . . ?
 C103 O101 C102 C101 -175.1(7) . . . . ?
 C103 C104 C105 C106 -176.9(8) . . . . ?
 C103 C104 C109 C108 175.8(8) . . . . ?
 C103 C218 C219 C214 164.4(19) . . . . ?
 C110 O103 C111 C112 -177.9(14) . . . . ?
 C110 C108 C109 C104 179.9(9) . . . . ?
 C110 C216 C217 C218 178.1(15) . . . . ?
 C111 O103 C110 O102 -2.9(15) . . . . ?
 C111 O103 C110 C108 175.1(10) . . . . ?
 C111 O103 C110 C216 -173.8(11) . . . . ?
 C114 C115 C116 C117 3.0(9) . . . . ?
 C114 C115 C116 C120 -176.9(5) . . . . ?
 C114 C113 N101 C106 -176.3(11) . . . . ?
 C114 N201 C213 C214 151(2) . . . . ?
 C115 C114 C119 C118 -1.0(9) . . . . ?
 C115 C114 C113 N101 -68(2) . . . . ?
 C115 C114 N201 C213 -147.4(17) . . . . ?
 C115 C116 C117 C118 -0.9(8) . . . . ?
 C115 C116 C120 O105 -13.9(8) . . . . ?
 C115 C116 C120 O106 166.2(6) . . . . ?
 C116 C117 C118 C119 -2.0(8) . . . . ?
 C116 C117 C118 C123 179.0(5) . . . . ?
 C117 C116 C120 O105 166.3(5) . . . . ?
 C117 C116 C120 O106 -13.7(9) . . . . ?
 C117 C118 C119 C114 3.0(8) . . . . ?
 C117 C118 C123 O107 -176.5(5) . . . . ?
 C117 C118 C123 O108 3.6(9) . . . . ?
 C119 C114 C115 C116 -2.0(9) . . . . ?
 C119 C114 C113 N101 105.5(19) . . . . ?
 C119 C114 N201 C213 41(3) . . . . ?
 C119 C118 C123 O107 4.5(8) . . . . ?
 C119 C118 C123 O108 -175.4(6) . . . . ?
 C120 O105 C121 C122 177.1(6) . . . . ?
 C120 C116 C117 C118 178.9(5) . . . . ?
 C121 O105 C120 O106 -1.3(9) . . . . ?
 C121 O105 C120 C116 178.8(6) . . . . ?
 C123 O107 C124 C125 -84.8(8) . . . . ?
 C123 C118 C119 C114 -178.0(5) . . . . ?
 C124 O107 C123 O108 2.2(10) . . . . ?
 C124 O107 C123 C118 -177.7(5) . . . . ?
 C113 C114 C115 C116 171.9(11) . . . . ?
 C113 C114 C119 C118 -175.1(11) . . . . ?
 C113 C114 N201 C213 -34(7) . . . . ?
 C113 N101 C106 C105 -15(2) . . . . ?
 C113 N101 C106 C107 167.3(15) . . . . ?
 N101 C106 C107 C108 177.6(9) . . . . ?
 C104 C103 C218 C217 46(2) . . . . ?
 C104 C103 C218 C219 -119(3) . . . . ?
 C104 C105 C106 N101 -177.2(8) . . . . ?
 C104 C105 C106 C107 0.2(13) . . . . ?
 C105 C104 C109 C108 -1.4(14) . . . . ?
 C105 C106 C107 C108 0.0(14) . . . . ?
 C106 C107 C108 C110 -179.1(9) . . . . ?
 C106 C107 C108 C109 -0.9(14) . . . . ?
 C107 C108 C109 C104 1.6(14) . . . . ?
 C108 C110 C216 C215 70(4) . . . . ?
 C108 C110 C216 C217 -108(4) . . . . ?
 C109 C104 C105 C106 0.5(14) . . . . ?
 O109 C126 C127 O110 64.9(14) . . . . ?
 O110 C128 C129 O111 -88.7(13) . . . . ?
 O111 C130 C131 C132 179.6(9) . . . . ?
 O111 C130 C135 O112 -0.7(12) . . . . ?
 O111 C130 C135 C134 178.3(9) . . . . ?
 O112 C136 C137 O113 -68.5(17) . . . . ?
 O113 C138 C139 O114 75.1(15) . . . . ?
 O114 C140 C141 C142 -171.6(15) . . . . ?
 C126 O109 C147 C146 175.6(9) . . . . ?
 C127 O110 C128 C129 -176.8(10) . . . . ?
 C128 O110 C127 C126 176.1(12) . . . . ?
 C129 O111 C130 C131 -9.0(13) . . . . ?
 C129 O111 C130 C135 168.7(9) . . . . ?
 C130 O111 C129 C128 -179.7(9) . . . . ?
 C130 C131 C132 C133 1.8(17) . . . . ?
 C131 C130 C135 O112 177.1(9) . . . . ?
 C131 C130 C135 C134 -4.0(15) . . . . ?
 C131 C132 C133 C134 -3.9(18) . . . . ?
 C132 C133 C134 C135 2.1(19) . . . . ?
 C133 C134 C135 O112 -179.2(10) . . . . ?
 C133 C134 C135 C130 1.9(17) . . . . ?
 C135 O112 C136 C137 -95.9(15) . . . . ?
 C135 C130 C131 C132 2.1(15) . . . . ?
 C136 O112 C135 C130 -163.5(10) . . . . ?
 C136 O112 C135 C134 17.6(16) . . . . ?
 C137 O113 C138 C139 164.6(12) . . . . ?
 C138 O113 C137 C136 -161.5(13) . . . . ?
 C139 O114 C140 C141 -168.1(11) . . . . ?
 C140 O114 C139 C138 -168.8(15) . . . . ?
 C140 C141 C142 C143 174.9(14) . . . . ?
 C141 C142 C143 C144 -55(2) . . . . ?
 C142 C143 C144 C145 -58(2) . . . . ?
 C143 C144 C145 C146 179.2(11) . . . . ?
 C144 C145 C146 C147 175.3(10) . . . . ?
 C145 C146 C147 O109 72.6(14) . . . . ?
 C147 O109 C126 C127 175.1(9) . . . . ?
 N201 C114 C115 C116 -174.2(14) . . . . ?
 N201 C114 C119 C118 170.7(15) . . . . ?
 N201 C114 C113 N101 -142(10) . . . . ?
 N201 C213 C214 C215 -101(2) . . . . ?
 N201 C213 C214 C219 79(2) . . . . ?
 C213 C214 C215 C216 179.8(19) . . . . ?
 C213 C214 C219 C218 -179.8(19) . . . . ?
 C214 C215 C216 C110 -178.0(15) . . . . ?
 C214 C215 C216 C217 0.0 . . . . ?
 C215 C214 C219 C218 0.0 . . . . ?
 C215 C216 C217 C218 0.0 . . . . ?
 C216 C110 C108 C107 -117(5) . . . . ?
 C216 C110 C108 C109 65(4) . . . . ?
 C216 C217 C218 C103 -166.3(17) . . . . ?
 C216 C217 C218 C219 0.0 . . . . ?
 C217 C218 C219 C214 0.0 . . . . ?
 C218 C103 C104 C105 62(3) . . . . ?
 C218 C103 C104 C109 -115(3) . . . . ?
 C219 C214 C215 C216 0.0 . . . . ?
 O209 C226 C227 O210 116(10) . . . . ?
 O210 C228 C229 O211 -124(7) . . . . ?
 O211 C230 C231 C232 176(3) . . . . ?
 O211 C230 C235 O212 3(3) . . . . ?
 O211 C230 C235 C234 -176(2) . . . . ?
 O212 C236 C237 O213 64(5) . . . . ?
 O213 C238 C239 O214 63(4) . . . . ?
 O214 C240 C241 C242 -156(7) . . . . ?
 C226 O209 C247 C246 160(9) . . . . ?
 C227 O210 C228 C229 -170(6) . . . . ?
 C228 O210 C227 C226 -134(6) . . . . ?
 C229 O211 C230 C231 -1(4) . . . . ?
 C229 O211 C230 C235 175(3) . . . . ?
 C230 O211 C229 C228 170(4) . . . . ?
 C230 C231 C232 C233 0.0 . . . . ?
 C231 C230 C235 O212 179(3) . . . . ?
 C231 C230 C235 C234 0.0 . . . . ?
 C231 C232 C233 C234 0.0 . . . . ?
 C232 C233 C234 C235 0.0 . . . . ?
 C233 C234 C235 O212 -180(3) . . . . ?
 C233 C234 C235 C230 0.0 . . . . ?
 C235 O212 C236 C237 143(4) . . . . ?
 C235 C230 C231 C232 0.0 . . . . ?
 C236 O212 C235 C230 139(3) . . . . ?
 C236 O212 C235 C234 -42(4) . . . . ?
 C237 O213 C238 C239 -179(3) . . . . ?
 C238 O213 C237 C236 175(3) . . . . ?
 C239 O214 C240 C241 167(4) . . . . ?
 C240 O214 C239 C238 -167(4) . . . . ?
 C240 C241 C242 C243 -178(7) . . . . ?
 C241 C242 C243 C244 -163(8) . . . . ?
 C242 C243 C244 C245 32(10) . . . . ?
 C243 C244 C245 C246 58(9) . . . . ?
 C244 C245 C246 C247 151(6) . . . . ?
 C245 C246 C247 O209 163(5) . . . . ?
 C247 O209 C226 C227 137(6) . . . . ?

_iucr_refine_instructions_details
;
TITL mo_NV008_0m in P2(1)/c
CELL 0.71073 15.8754 34.2113 18.0716 90 108.219 90
ZERR 8 0.0012 0.0029 0.0015 0 0.0018 0
LATT 1
SYMM -X,0.5+Y,0.5-Z
SFAC C H N O
UNIT 376 520 8 112
SIMU 0.04 0.08 1.7 O109 O110 O111 O112 O113 O114 C126 C127 C128 C129 C130 =
 C131 C132 C133 C134 C135 C136 C137 C138 C139 C140 C141 C142 C143 C144 C145 =
 C146 C147
SIMU 0.04 0.08 1.7 O209 O210 O211 O212 O213 O214 C226 C227 C228 C229 C230 =
 C231 C232 C233 C234 C235 C236 C237 C238 C239 C240 C241 C242 C243 C244 C245 =
 C246 C247
SIMU 0.04 0.08 1.7 C113 N101 C106 C107 C108 C109 C104 C105
SIMU 0.04 0.08 1.7 N201 C213 C214 C215 C216 C217 C218 C219
 
L.S. 50
PLAN  2
TEMP -100
BOND
MORE -1
BOND $H
CONF
fmap 2
acta
OMIT -3 50
REM <olex2.extras>
REM <HklSrc "%.\\mo_NV008_0m.hkl">
REM </olex2.extras>
 
WGHT    0.017700   39.454304
FVAR       0.03788   0.73544
O1    4    0.588489   -0.120405    0.306367    11.00000    0.09553    0.05748 =
         0.08948    0.01993    0.03257    0.02109
O2    4    0.648597   -0.072180    0.257115    11.00000    0.06853    0.06570 =
         0.11904    0.01445    0.03209    0.00906
O3    4    0.222103   -0.054838    0.302783    11.00000    0.09806    0.08812 =
         0.15364   -0.00884    0.07041   -0.01576
O4    4    0.298974   -0.109389    0.340891    11.00000    0.13128    0.08483 =
         0.13701    0.02886    0.06859   -0.01382
O5    4    0.459203    0.170009    0.029952    11.00000    0.19842    0.08626 =
         0.05756    0.02267    0.03845    0.03320
O6    4    0.446407    0.225311    0.089657    11.00000    0.19171    0.06797 =
         0.10451    0.03830    0.06193    0.04642
O7    4    0.532534    0.160079    0.434735    11.00000    0.23194    0.12426 =
         0.06158   -0.02363    0.05855   -0.02262
O8    4    0.514550    0.218964    0.378817    11.00000    0.22391    0.08822 =
         0.10999   -0.02209    0.08548   -0.01625
N1    3    0.427523    0.040248    0.244609    11.00000    0.05007    0.05956 =
         0.07453    0.01440    0.02277    0.01237
AFIX  43
H1    2    0.383776    0.053773    0.252166    11.00000   -1.20000
AFIX   0
C1    1    0.662596   -0.177765    0.361302    11.00000    0.22485    0.16047 =
         0.30949    0.15640    0.14430    0.12449
AFIX  33
H1A   2    0.715230   -0.194141    0.368640    11.00000   -1.50000
H1B   2    0.609353   -0.192780    0.334074    11.00000   -1.50000
H1C   2    0.659294   -0.169407    0.412191    11.00000   -1.50000
AFIX   0
C2    1    0.668280   -0.144284    0.316246    11.00000    0.09858    0.06385 =
         0.14011    0.01361    0.05194    0.02739
AFIX  23
H2A   2    0.671922   -0.152431    0.264768    11.00000   -1.20000
H2B   2    0.722056   -0.128975    0.343168    11.00000   -1.20000
AFIX   0
C3    1    0.589609   -0.084423    0.277820    11.00000    0.06896    0.05520 =
         0.04964    0.00437    0.00961    0.00528
C4    1    0.508582   -0.062299    0.275552    11.00000    0.05604    0.04350 =
         0.04806    0.00344    0.00406   -0.00455
C5    1    0.504219   -0.022839    0.255907    11.00000    0.04417    0.05678 =
         0.05546    0.00584    0.00073   -0.00538
AFIX  43
H5    2    0.551681   -0.011191    0.242320    11.00000   -1.20000
AFIX   0
C6    1    0.430961   -0.000068    0.255872    11.00000    0.04600    0.04247 =
         0.06132    0.00607   -0.00120    0.00482
C7    1    0.360713   -0.018117    0.272219    11.00000    0.04553    0.05595 =
         0.05814   -0.00260    0.00200   -0.00221
AFIX  43
H7    2    0.309164   -0.003409    0.269807    11.00000   -1.20000
AFIX   0
C8    1    0.364618   -0.056951    0.291844    11.00000    0.06591    0.05407 =
         0.05802    0.00142    0.01217   -0.00497
C9    1    0.438841   -0.079174    0.293397    11.00000    0.07297    0.04289 =
         0.05311   -0.00008    0.00828   -0.00464
AFIX  43
H9    2    0.441151   -0.106085    0.306851    11.00000   -1.20000
AFIX   0
C10   1    0.293790   -0.077361    0.314406    11.00000    0.07456    0.07521 =
         0.09273   -0.00695    0.03691   -0.01171
C11   1    0.147297   -0.071821    0.323486    11.00000    0.14420    0.12351 =
         0.25708   -0.04204    0.15664   -0.04522
AFIX  23
H11H  2    0.109932   -0.087238    0.278914    11.00000   -1.20000
H11I  2    0.170453   -0.089810    0.368161    11.00000   -1.20000
AFIX   0
C12   1    0.100059   -0.045697    0.341238    11.00000    0.12170    0.24791 =
         0.32986   -0.08303    0.14499   -0.02104
AFIX  33
H12S  2    0.051268   -0.058127    0.354848    11.00000   -1.50000
H12T  2    0.075847   -0.028196    0.296707    11.00000   -1.50000
H12U  2    0.136627   -0.030620    0.385849    11.00000   -1.50000
AFIX   0
C13   1    0.493084    0.059521    0.221337    11.00000    0.04328    0.06504 =
         0.07954    0.03073    0.02012    0.00734
AFIX  23
H13I  2    0.487592    0.051786    0.167240    11.00000   -1.20000
H13J  2    0.552199    0.051041    0.255185    11.00000   -1.20000
AFIX   0
C14   1    0.486880    0.103583    0.225285    11.00000    0.03547    0.04702 =
         0.05632    0.00581    0.01335   -0.00111
C15   1    0.470615    0.125567    0.158596    11.00000    0.04095    0.05714 =
         0.05313    0.00184    0.01117    0.00420
AFIX  43
H15   2    0.460509    0.112865    0.109841    11.00000   -1.20000
AFIX   0
C16   1    0.468764    0.166327    0.161628    11.00000    0.05200    0.04499 =
         0.05311    0.00208    0.01942    0.00735
C17   1    0.482146    0.184544    0.231072    11.00000    0.05526    0.04615 =
         0.07755    0.00825    0.03568    0.00447
AFIX  43
H17   2    0.479695    0.212260    0.232898    11.00000   -1.20000
AFIX   0
C18   1    0.499266    0.163284    0.299034    11.00000    0.06128    0.06299 =
         0.05233   -0.00968    0.03193   -0.00432
C19   1    0.501672    0.122867    0.295350    11.00000    0.05020    0.07000 =
         0.05560    0.02388    0.02693    0.00327
AFIX  43
H19   2    0.513758    0.108096    0.342027    11.00000   -1.20000
AFIX   0
C20   1    0.456381    0.190763    0.090932    11.00000    0.09162    0.06584 =
         0.06883    0.02427    0.02445    0.02299
C21   1    0.462450    0.192810   -0.042320    11.00000    0.17831    0.10024 =
         0.08850    0.02285    0.00339    0.00107
AFIX  23
H21C  2    0.457437    0.221301   -0.035063    11.00000   -1.20000
H21D  2    0.517972    0.187387   -0.054443    11.00000   -1.20000
AFIX   0
C22   1    0.389730    0.178705   -0.099806    11.00000    0.16029    0.10345 =
         0.11636    0.00917   -0.00864    0.00887
AFIX  33
H22I  2    0.385391    0.191627   -0.149260    11.00000   -1.50000
H22J  2    0.335952    0.183994   -0.085823    11.00000   -1.50000
H22K  2    0.396078    0.150451   -0.105262    11.00000   -1.50000
AFIX   0
C23   1    0.516455    0.183860    0.373901    11.00000    0.13884    0.07333 =
         0.09173    0.00320    0.05764   -0.01205
C24   1    0.541685    0.176138    0.521214    11.00000    0.32369    0.10581 =
         0.21984   -0.01742    0.00708   -0.10599
AFIX  23
H24Q  2    0.501939    0.198497    0.520765    11.00000   -1.20000
H24R  2    0.533569    0.155402    0.556591    11.00000   -1.20000
AFIX   0
C25   1    0.618909    0.185834    0.534935    11.00000    0.55739    0.14861 =
         0.14829   -0.04722    0.16732   -0.13591
AFIX  33
H25A  2    0.640746    0.197116    0.587329    11.00000   -1.50000
H25B  2    0.623476    0.205305    0.496597    11.00000   -1.50000
H25C  2    0.654621    0.162881    0.531914    11.00000   -1.50000
AFIX   0
 
O9    4    0.605415    0.040000    0.417719    11.00000    0.07798    0.08811 =
         0.05612    0.00765    0.02371   -0.00160
O10   4    0.708896    0.044553    0.307761    11.00000    0.05690    0.06697 =
         0.04450    0.01589    0.01458    0.01158
O11   4    0.644144    0.056954    0.135923    11.00000    0.03799    0.06669 =
         0.04640    0.00051    0.01274    0.00514
O12   4    0.489052    0.048791    0.031528    11.00000    0.04884    0.06200 =
         0.04489   -0.01046    0.00156    0.00864
O13   4    0.305661    0.045344    0.047301    11.00000    0.04865    0.04321 =
         0.09681   -0.00774    0.01291   -0.00178
O14   4    0.240140    0.066791    0.179376    11.00000    0.03681    0.07875 =
         0.09442    0.01772    0.01468    0.00744
C26   1    0.699104    0.042671    0.437745    11.00000    0.07829    0.10588 =
         0.03720    0.02613   -0.00421   -0.02870
AFIX  23
H26A  2    0.727078    0.030528    0.489336    11.00000   -1.20000
H26B  2    0.717211    0.070468    0.440830    11.00000   -1.20000
AFIX   0
C27   1    0.728743    0.022412    0.378119    11.00000    0.06045    0.08051 =
         0.05602    0.02530    0.00420    0.00072
AFIX  23
H27A  2    0.793510    0.017903    0.398641    11.00000   -1.20000
H27B  2    0.699188   -0.003373    0.366806    11.00000   -1.20000
AFIX   0
C28   1    0.738577    0.025612    0.251663    11.00000    0.03340    0.05646 =
         0.05071    0.00275    0.00831   -0.00153
AFIX  23
H28A  2    0.701410    0.002278    0.232085    11.00000   -1.20000
H28B  2    0.800492    0.016770    0.275859    11.00000   -1.20000
AFIX   0
C29   1    0.734100    0.052357    0.185207    11.00000    0.03536    0.06424 =
         0.04255    0.00400    0.00865    0.00091
AFIX  23
H29A  2    0.758753    0.078194    0.205595    11.00000   -1.20000
H29B  2    0.770459    0.041559    0.154416    11.00000   -1.20000
AFIX   0
C30   1    0.633353    0.074798    0.065345    11.00000    0.05984    0.04673 =
         0.03800   -0.00394    0.01965    0.00680
C31   1    0.697413    0.096028    0.048059    11.00000    0.06416    0.06623 =
         0.05280   -0.00066    0.02295    0.00267
AFIX  43
H31   2    0.752910    0.100385    0.086774    11.00000   -1.20000
AFIX   0
C32   1    0.681262    0.111329   -0.026582    11.00000    0.09824    0.06815 =
         0.08187    0.01609    0.05328    0.00386
AFIX  43
H32   2    0.725592    0.126552   -0.038169    11.00000   -1.20000
AFIX   0
C33   1    0.602507    0.104688   -0.083190    11.00000    0.11243    0.09763 =
         0.04945    0.01133    0.03034    0.01838
AFIX  43
H33   2    0.593154    0.114104   -0.134594    11.00000   -1.20000
AFIX   0
C34   1    0.535888    0.084011   -0.065133    11.00000    0.08458    0.07278 =
         0.03735   -0.00082    0.01280    0.01381
AFIX  43
H34   2    0.480373    0.079997   -0.104041    11.00000   -1.20000
AFIX   0
C35   1    0.550003    0.069307    0.008961    11.00000    0.05956    0.04958 =
         0.03839   -0.00965    0.01490    0.01202
C36   1    0.404983    0.040446   -0.027093    11.00000    0.05761    0.07229 =
         0.05515   -0.02392   -0.00862    0.01800
AFIX  23
H36A  2    0.414948    0.024216   -0.068942    11.00000   -1.20000
H36B  2    0.376452    0.065166   -0.050560    11.00000   -1.20000
AFIX   0
C37   1    0.346575    0.019470    0.009111    11.00000    0.05456    0.05760 =
         0.08172   -0.02001   -0.00781   -0.00001
AFIX  23
H37A  2    0.300565    0.005103   -0.031585    11.00000   -1.20000
H37B  2    0.381933    0.000144    0.046964    11.00000   -1.20000
AFIX   0
C38   1    0.240178    0.025287    0.072039    11.00000    0.06135    0.06253 =
         0.10272    0.01143   -0.00896   -0.02689
AFIX  23
H38A  2    0.269328    0.005248    0.111195    11.00000   -1.20000
H38B  2    0.198296    0.011815    0.026931    11.00000   -1.20000
AFIX   0
C39   1    0.190194    0.053126    0.106606    11.00000    0.04441    0.08261 =
         0.11016    0.02837    0.01165    0.00122
AFIX  23
H39A  2    0.170417    0.075639    0.070970    11.00000   -1.20000
H39B  2    0.136641    0.039870    0.111248    11.00000   -1.20000
AFIX   0
C40   1    0.189469    0.092870    0.212207    11.00000    0.05477    0.09614 =
         0.14694    0.03031    0.05539    0.01879
AFIX  23
H40A  2    0.136757    0.078903    0.216893    11.00000   -1.20000
H40B  2    0.168501    0.115346    0.176708    11.00000   -1.20000
AFIX   0
C41   1    0.242780    0.107337    0.289581    11.00000    0.07615    0.08699 =
         0.14565    0.00813    0.05096    0.02021
AFIX  23
H41A  2    0.299332    0.117894    0.285751    11.00000   -1.20000
H41B  2    0.210514    0.129152    0.304607    11.00000   -1.20000
AFIX   0
C42   1    0.262826    0.077581    0.351507    11.00000    0.07708    0.06565 =
         0.13361    0.02894    0.04724    0.01174
AFIX  23
H42A  2    0.305425    0.058536    0.342285    11.00000   -1.20000
H42B  2    0.207676    0.063263    0.348554    11.00000   -1.20000
AFIX   0
C43   1    0.302003    0.094785    0.433981    11.00000    0.12046    0.08905 =
         0.10753   -0.01250    0.06559    0.01334
AFIX  23
H43A  2    0.349604    0.113504    0.434106    11.00000   -1.20000
H43B  2    0.255096    0.109400    0.447626    11.00000   -1.20000
AFIX   0
C44   1    0.338800    0.064350    0.494085    11.00000    0.14193    0.09737 =
         0.07983    0.00902    0.06917    0.01469
AFIX  23
H44A  2    0.309994    0.039049    0.474803    11.00000   -1.20000
H44B  2    0.323845    0.071225    0.541707    11.00000   -1.20000
AFIX   0
C45   1    0.437218    0.059505    0.514928    11.00000    0.10454    0.10606 =
         0.07819    0.01438    0.03837   -0.01481
AFIX  23
H45A  2    0.465204    0.083738    0.541354    11.00000   -1.20000
H45B  2    0.454988    0.038083    0.553522    11.00000   -1.20000
AFIX   0
C46   1    0.474679    0.051282    0.453159    11.00000    0.09608    0.08311 =
         0.06969    0.01100    0.04673    0.00393
AFIX  23
H46A  2    0.450108    0.070200    0.410382    11.00000   -1.20000
H46B  2    0.455514    0.024847    0.432372    11.00000   -1.20000
AFIX   0
C47   1    0.573305    0.053136    0.476844    11.00000    0.09759    0.09284 =
         0.04345    0.01427    0.02180   -0.02346
AFIX  23
H47A  2    0.592783    0.080443    0.490228    11.00000   -1.20000
H47B  2    0.598588    0.036889    0.523912    11.00000   -1.20000
AFIX   0
 
O101  4    0.906199   -0.127419    0.215715    11.00000    0.07786    0.04534 =
         0.10841    0.00753    0.01672    0.01018
O102  4    1.196816   -0.146000    0.177126    11.00000    0.12606    0.08969 =
         0.11439    0.04918    0.02793    0.00396
O103  4    1.264149   -0.201941    0.217598    11.00000    0.09461    0.10545 =
         0.15636    0.03982    0.03790    0.02605
O104  4    0.832686   -0.177412    0.246601    11.00000    0.11016    0.07325 =
         0.21292    0.03809    0.07124    0.00847
O105  4    0.950973   -0.429993    0.060487    11.00000    0.07802    0.05378 =
         0.04842   -0.00709    0.00350    0.00919
O106  4    1.028711   -0.479300    0.128525    11.00000    0.08717    0.05457 =
         0.06461   -0.01351    0.00752    0.02087
O107  4    1.085454   -0.411905    0.470913    11.00000    0.08386    0.05803 =
         0.04292    0.00798    0.02218    0.01616
O108  4    1.101490   -0.470290    0.419979    11.00000    0.09708    0.04953 =
         0.05848    0.01012    0.02291    0.01852
C101  1    0.848216   -0.063004    0.184432    11.00000    0.11566    0.05513 =
         0.16226    0.01463    0.04578    0.02784
AFIX  33
H10A  2    0.797937   -0.045637    0.180604    11.00000   -1.50000
H10B  2    0.857153   -0.065137    0.133325    11.00000   -1.50000
H10C  2    0.901819   -0.052292    0.222154    11.00000   -1.50000
AFIX   0
C102  1    0.829331   -0.102973    0.210948    11.00000    0.09799    0.05863 =
         0.11894    0.00283    0.03768    0.01193
AFIX  23
H10D  2    0.820005   -0.101231    0.262513    11.00000   -1.20000
H10E  2    0.775329   -0.114165    0.173277    11.00000   -1.20000
AFIX   0
C103  1    0.896872   -0.165105    0.232945    11.00000    0.07925    0.05433 =
         0.11270    0.01506    0.00392   -0.00386
C110  1    1.193917   -0.178322    0.200554    11.00000    0.07980    0.08630 =
         0.08338    0.01104    0.01187    0.01027
C111  1    1.344436   -0.186375    0.202106    11.00000    0.10849    0.16320 =
         0.26551    0.08464    0.10500    0.01393
AFIX  23
H11A  2    1.329511   -0.178898    0.146572    11.00000   -1.20000
H11B  2    1.365535   -0.162732    0.234128    11.00000   -1.20000
AFIX   0
C112  1    1.405720   -0.212207    0.218416    11.00000    0.16816    0.18059 =
         0.39323    0.09337    0.16815    0.04411
AFIX  33
H11C  2    1.458332   -0.201633    0.208113    11.00000   -1.50000
H11D  2    1.384988   -0.235428    0.186094    11.00000   -1.50000
H11E  2    1.420806   -0.219357    0.273540    11.00000   -1.50000
AFIX   0
C114  1    1.001736   -0.359337    0.254650    11.00000    0.05526    0.03322 =
         0.04775    0.00149    0.01402    0.00236
C115  1    0.987773   -0.382336    0.188971    11.00000    0.04983    0.03867 =
         0.03847    0.00576    0.00391    0.00193
AFIX  43
H115  2    0.964152   -0.370886    0.138835    11.00000   -1.20000
AFIX   0
C116  1    1.007996   -0.422272    0.195404    11.00000    0.03738    0.03713 =
         0.03933   -0.00610    0.00941   -0.00424
C117  1    1.038382   -0.438979    0.268376    11.00000    0.03240    0.03354 =
         0.04984    0.00252    0.01177    0.00217
AFIX  43
H117  2    1.051432   -0.466138    0.273192    11.00000   -1.20000
AFIX   0
C118  1    1.050132   -0.416573    0.334911    11.00000    0.03600    0.04261 =
         0.03865    0.00925    0.00934    0.00484
C119  1    1.033506   -0.376672    0.327239    11.00000    0.04417    0.04153 =
         0.03786   -0.00185    0.01347    0.00257
AFIX  43
H119  2    1.044144   -0.361011    0.372653    11.00000   -1.20000
AFIX   0
C120  1    0.998033   -0.446923    0.126637    11.00000    0.04315    0.04491 =
         0.05144   -0.00445    0.01110    0.00033
C121  1    0.939634   -0.452552   -0.011262    11.00000    0.11159    0.06453 =
         0.05061   -0.02396    0.00575    0.01201
AFIX  23
H12A  2    0.997984   -0.457223   -0.018735    11.00000   -1.20000
H12B  2    0.912142   -0.478173   -0.007760    11.00000   -1.20000
AFIX   0
C122  1    0.883081   -0.430273   -0.076212    11.00000    0.12388    0.07578 =
         0.05935   -0.00926   -0.00067    0.00789
AFIX  33
H12C  2    0.874648   -0.444829   -0.124700    11.00000   -1.50000
H12D  2    0.910972   -0.405039   -0.079378    11.00000   -1.50000
H12E  2    0.825430   -0.425904   -0.068421    11.00000   -1.50000
AFIX   0
C123  1    1.081255   -0.435799    0.411512    11.00000    0.05554    0.05178 =
         0.04592    0.00205    0.01711    0.00716
C124  1    1.118747   -0.427653    0.549715    11.00000    0.10983    0.06104 =
         0.04331   -0.00166    0.01892    0.00988
AFIX  23
H12F  2    1.143953   -0.406206    0.586808    11.00000   -1.20000
H12G  2    1.166641   -0.446700    0.552680    11.00000   -1.20000
AFIX   0
C125  1    1.047050   -0.447037    0.571659    11.00000    0.12706    0.11637 =
         0.08610    0.02506    0.05158    0.00038
AFIX  33
H12H  2    1.070726   -0.457387    0.624708    11.00000   -1.50000
H12I  2    1.022737   -0.468524    0.535409    11.00000   -1.50000
H12J  2    1.000043   -0.428080    0.569444    11.00000   -1.50000
AFIX   0
PART -1
C113  1    0.992286   -0.316954    0.249988    21.00000    0.12818    0.05182 =
         0.09913    0.02407   -0.03513   -0.03911
AFIX  23
H11F  2    0.931997   -0.311580    0.214278    21.00000   -1.20000
H11G  2    0.992951   -0.307970    0.302242    21.00000   -1.20000
AFIX   0
N101  3    1.041632   -0.295885    0.230310    21.00000    0.07729    0.05171 =
         0.09151    0.01636    0.05643    0.01528
AFIX  43
H101  2    1.083044   -0.307689    0.215649    21.00000   -1.20000
AFIX   0
C104  1    0.977831   -0.190351    0.224078    21.00000    0.05003    0.04057 =
         0.04204    0.00696    0.02012    0.01043
C105  1    0.971949   -0.230846    0.230834    21.00000    0.05533    0.03614 =
         0.05918    0.01135    0.02148   -0.00292
AFIX  43
H105  2    0.920414   -0.242339    0.237676    21.00000   -1.20000
AFIX   0
C106  1    1.042300   -0.254116    0.227434    21.00000    0.07051    0.03523 =
         0.06346    0.01491    0.03248    0.01005
C107  1    1.116359   -0.236253    0.217613    21.00000    0.05922    0.04973 =
         0.05840    0.01751    0.02903    0.01566
AFIX  43
H107  2    1.164386   -0.252241    0.215267    21.00000   -1.20000
AFIX   0
C108  1    1.123542   -0.196594    0.211126    21.00000    0.05266    0.04747 =
         0.04463    0.02023    0.02002    0.01505
C109  1    1.052964   -0.173744    0.213485    21.00000    0.06201    0.03556 =
         0.04924    0.00607    0.01872   -0.00131
AFIX  43
H109  2    1.055786   -0.146215    0.207776    21.00000   -1.20000
AFIX   0
 
O109  4    1.237836   -0.320779    0.282368    21.00000    0.05620    0.06521 =
         0.08486    0.00549    0.03292    0.00435
O110  4    1.186244   -0.302376    0.421609    21.00000    0.05530    0.07506 =
         0.08930    0.00052    0.02548    0.00486
O111  4    0.998572   -0.299119    0.439214    21.00000    0.04974    0.06176 =
         0.05205   -0.00790    0.01330    0.00183
O112  4    0.841325   -0.282822    0.346717    21.00000    0.04739    0.12002 =
         0.06656    0.01007    0.01727    0.01931
O113  4    0.758651   -0.276568    0.178710    21.00000    0.06443    0.10845 =
         0.07977    0.00699    0.02089   -0.02300
O114  4    0.825700   -0.297878    0.051264    21.00000    0.10093    0.07866 =
         0.14806    0.02446    0.07387    0.00724
C126  1    1.294034   -0.305841    0.352091    21.00000    0.05213    0.07783 =
         0.11150    0.00318    0.02800   -0.01466
AFIX  23
H12K  2    1.341301   -0.290417    0.340724    21.00000   -1.20000
H12L  2    1.322787   -0.327937    0.385984    21.00000   -1.20000
AFIX   0
C127  1    1.248867   -0.280566    0.395627    21.00000    0.07010    0.08141 =
         0.08962    0.01444    0.02721   -0.00955
AFIX  23
H12M  2    1.293876   -0.268915    0.441217    21.00000   -1.20000
H12N  2    1.217763   -0.258981    0.361438    21.00000   -1.20000
AFIX   0
C128  1    1.149485   -0.278691    0.466306    21.00000    0.06301    0.09476 =
         0.08197   -0.00762    0.01258   -0.01277
AFIX  23
H12O  2    1.116889   -0.256867    0.433808    21.00000   -1.20000
H12P  2    1.197642   -0.267375    0.509986    21.00000   -1.20000
AFIX   0
C129  1    1.087049   -0.301310    0.498394    21.00000    0.06017    0.09022 =
         0.05028   -0.01482    0.00665   -0.00620
AFIX  23
H12Q  2    1.106502   -0.328859    0.507946    21.00000   -1.20000
H12R  2    1.085485   -0.289683    0.548113    21.00000   -1.20000
AFIX   0
C130  1    0.929596   -0.317563    0.455444    21.00000    0.06496    0.04993 =
         0.05487   -0.01644    0.02740   -0.00343
C131  1    0.939533   -0.341598    0.516887    21.00000    0.09104    0.05652 =
         0.06603   -0.01390    0.03736   -0.00393
AFIX  43
H131  2    0.996988   -0.346755    0.551894    21.00000   -1.20000
AFIX   0
C132  1    0.863267   -0.359266    0.529081    21.00000    0.14979    0.06123 =
         0.10269   -0.00107    0.07556    0.00550
AFIX  43
H132  2    0.869103   -0.375636    0.572865    21.00000   -1.20000
AFIX   0
C133  1    0.780992   -0.352021    0.475868    21.00000    0.10219    0.07197 =
         0.14753   -0.04538    0.07297   -0.01827
AFIX  43
H133  2    0.730222   -0.364837    0.481422    21.00000   -1.20000
AFIX   0
C134  1    0.771496   -0.326616    0.415159    21.00000    0.08044    0.07402 =
         0.10797   -0.01607    0.04413    0.00196
AFIX  43
H134  2    0.714275   -0.321228    0.379958    21.00000   -1.20000
AFIX   0
C135  1    0.845909   -0.308761    0.405287    21.00000    0.05147    0.06829 =
         0.07868   -0.03204    0.02998   -0.00392
C136  1    0.759899   -0.262493    0.301438    21.00000    0.06450    0.11574 =
         0.12265    0.00632    0.03010    0.01562
AFIX  23
H13A  2    0.720128   -0.260639    0.333960    21.00000   -1.20000
H13B  2    0.775879   -0.235499    0.291270    21.00000   -1.20000
AFIX   0
C137  1    0.716179   -0.278151    0.235846    21.00000    0.06670    0.09877 =
         0.07868   -0.01412    0.03873    0.01772
AFIX  23
H13C  2    0.658110   -0.264834    0.215701    21.00000   -1.20000
H13D  2    0.704568   -0.305871    0.245046    21.00000   -1.20000
AFIX   0
C138  1    0.708897   -0.281883    0.101363    21.00000    0.08973    0.09262 =
         0.09653    0.00745    0.02694    0.00854
AFIX  23
H13E  2    0.652935   -0.266897    0.089946    21.00000   -1.20000
H13F  2    0.693639   -0.309887    0.091841    21.00000   -1.20000
AFIX   0
C139  1    0.755611   -0.269560    0.052303    21.00000    0.08264    0.10015 =
         0.12858    0.01096    0.05195    0.02735
AFIX  23
H13G  2    0.782928   -0.243804    0.070005    21.00000   -1.20000
H13H  2    0.714171   -0.266416   -0.001150    21.00000   -1.20000
AFIX   0
C140  1    0.879102   -0.283040    0.016294    21.00000    0.08144    0.10710 =
         0.11818    0.02130    0.05251    0.01159
AFIX  23
H14A  2    0.916466   -0.262545    0.049440    21.00000   -1.20000
H14B  2    0.844122   -0.270902   -0.033576    21.00000   -1.20000
AFIX   0
C141  1    0.938877   -0.315953    0.000640    21.00000    0.13280    0.08113 =
         0.10862    0.02663    0.06269    0.01392
AFIX  23
H14C  2    0.965193   -0.330635    0.049657    21.00000   -1.20000
H14D  2    0.900902   -0.334336   -0.037825    21.00000   -1.20000
AFIX   0
C142  1    1.011131   -0.302797   -0.028336    21.00000    0.10713    0.11059 =
         0.11239    0.01581    0.04554   -0.00618
AFIX  23
H14E  2    1.044921   -0.282422    0.007746    21.00000   -1.20000
H14F  2    0.983782   -0.290050   -0.079414    21.00000   -1.20000
AFIX   0
C143  1    1.075355   -0.331958   -0.038221    21.00000    0.16260    0.08932 =
         0.11052    0.01488    0.07898    0.02908
AFIX  23
H14G  2    1.120346   -0.317881   -0.055552    21.00000   -1.20000
H14H  2    1.043354   -0.349648   -0.081165    21.00000   -1.20000
AFIX   0
C144  1    1.123536   -0.356800    0.029948    21.00000    0.16455    0.07037 =
         0.09276   -0.00589    0.07630    0.03304
AFIX  23
H14I  2    1.163710   -0.374674    0.013919    21.00000   -1.20000
H14J  2    1.079761   -0.373066    0.044733    21.00000   -1.20000
AFIX   0
C145  1    1.177084   -0.334107    0.100330    21.00000    0.12745    0.07003 =
         0.11276    0.00784    0.09476    0.01380
AFIX  23
H14K  2    1.137382   -0.316012    0.116448    21.00000   -1.20000
H14L  2    1.221901   -0.318202    0.086259    21.00000   -1.20000
AFIX   0
C146  1    1.223539   -0.360446    0.168152    21.00000    0.07473    0.06620 =
         0.12747    0.00950    0.04324    0.01652
AFIX  23
H14M  2    1.177443   -0.374809    0.183459    21.00000   -1.20000
H14N  2    1.257910   -0.380054    0.149299    21.00000   -1.20000
AFIX   0
C147  1    1.284408   -0.342026    0.239333    21.00000    0.03731    0.07936 =
         0.14596   -0.01215    0.04277   -0.00438
AFIX  23
H14O  2    1.320765   -0.362597    0.273073    21.00000   -1.20000
H14P  2    1.325072   -0.324055    0.224189    21.00000   -1.20000
AFIX   0
 
PART 0
PART -2
N201  3    0.970862   -0.318588    0.243280   -21.00000    0.02080
AFIX  43
H201  2    0.923519   -0.311246    0.205428   -21.00000   -1.20000
AFIX   0
C213  1    1.023923   -0.292399    0.298446   -21.00000    0.05294
AFIX  23
H21A  2    1.085136   -0.302855    0.315752   -21.00000   -1.20000
H21B  2    1.002505   -0.292512    0.344348   -21.00000   -1.20000
AFIX  66
C214  1    1.028332   -0.251321    0.274914   -21.00000    0.04973
C215  1    1.100045   -0.237391    0.254115   -21.00000    0.04677
AFIX  43
H215  2    1.147648   -0.254401    0.254995   -21.00000   -1.20000
AFIX  65
C216  1    1.102107   -0.198575    0.232028   -21.00000    0.03401
C217  1    1.032455   -0.173687    0.230739   -21.00000    0.03037
AFIX  43
H217  2    1.033864   -0.147157    0.215644   -21.00000   -1.20000
AFIX  65
C218  1    0.960741   -0.187615    0.251539   -21.00000    0.03878
C219  1    0.958679   -0.226432    0.273626   -21.00000    0.05624
AFIX  43
H219  2    0.909666   -0.235952    0.287842   -21.00000   -1.20000
AFIX   0
 
O209  4    0.776704   -0.293812    0.229864   -21.00000    0.15510
O210  4    0.789491   -0.299894    0.062482   -21.00000    0.23538
O211  4    1.013610   -0.303536    0.063098   -21.00000    0.08292
O212  4    1.177508   -0.318562    0.164586   -21.00000    0.09727
O213  4    1.244439   -0.309280    0.333669   -21.00000    0.06329
O214  4    1.193417   -0.301892    0.474011   -21.00000    0.10498
C226  1    0.743445   -0.291091    0.178580   -21.00000    0.12734
AFIX  23
H22A  2    0.683694   -0.282257    0.177518   -21.00000   -1.20000
H22B  2    0.736280   -0.317475    0.154921   -21.00000   -1.20000
AFIX   0
C227  1    0.771644   -0.266176    0.129302   -21.00000    0.12395
AFIX  23
H22C  2    0.826895   -0.252239    0.157876   -21.00000   -1.20000
H22D  2    0.725317   -0.246894    0.103371   -21.00000   -1.20000
AFIX   0
C228  1    0.866161   -0.282171    0.069160   -21.00000    0.16106
AFIX  23
H22E  2    0.905400   -0.286992    0.122899   -21.00000   -1.20000
H22F  2    0.854019   -0.253737    0.064931   -21.00000   -1.20000
AFIX   0
C229  1    0.924802   -0.292297    0.009913   -21.00000    0.10535
AFIX  23
H22G  2    0.897656   -0.314087   -0.025584   -21.00000   -1.20000
H22H  2    0.929083   -0.269140   -0.021568   -21.00000   -1.20000
AFIX  66
C230  1    1.072558   -0.319349    0.032277   -21.00000    0.08413
C231  1    1.058276   -0.327225   -0.046156   -21.00000    0.08614
AFIX  43
H231  2    1.001419   -0.322967   -0.082930   -21.00000   -1.20000
AFIX  65
C232  1    1.127184   -0.341330   -0.070783   -21.00000    0.13098
AFIX  43
H232  2    1.117422   -0.346713   -0.124389   -21.00000   -1.20000
AFIX  65
C233  1    1.210374   -0.347560   -0.016978   -21.00000    0.12428
AFIX  43
H233  2    1.257469   -0.357200   -0.033810   -21.00000   -1.20000
AFIX  65
C234  1    1.224657   -0.339684    0.061455   -21.00000    0.11043
AFIX  43
H234  2    1.281514   -0.343942    0.098228   -21.00000   -1.20000
AFIX  65
C235  1    1.155750   -0.325579    0.086083   -21.00000    0.12048
AFIX   0
C236  1    1.231201   -0.345046    0.218136   -21.00000    0.08889
AFIX  23
H23A  2    1.264185   -0.360840    0.190458   -21.00000   -1.20000
H23B  2    1.191826   -0.363126    0.234708   -21.00000   -1.20000
AFIX   0
C237  1    1.295799   -0.328904    0.288694   -21.00000    0.10501
AFIX  23
H23C  2    1.335280   -0.309945    0.274487   -21.00000   -1.20000
H23D  2    1.332659   -0.350086    0.319964   -21.00000   -1.20000
AFIX   0
C238  1    1.307161   -0.296395    0.406505   -21.00000    0.07055
AFIX  23
H23E  2    1.349932   -0.277692    0.396487   -21.00000   -1.20000
H23F  2    1.340534   -0.318988    0.435578   -21.00000   -1.20000
AFIX   0
C239  1    1.254405   -0.276868    0.453083   -21.00000    0.08137
AFIX  23
H23G  2    1.296403   -0.265967    0.501321   -21.00000   -1.20000
H23H  2    1.220960   -0.254724    0.422336   -21.00000   -1.20000
AFIX   0
C240  1    1.135209   -0.283561    0.500863   -21.00000    0.09270
AFIX  23
H24A  2    1.110378   -0.261055    0.466538   -21.00000   -1.20000
H24B  2    1.166338   -0.273205    0.553482   -21.00000   -1.20000
AFIX   0
C241  1    1.058703   -0.309991    0.505420   -21.00000    0.12138
AFIX  23
H24C  2    1.051019   -0.328680    0.461979   -21.00000   -1.20000
H24D  2    1.084713   -0.325416    0.553519   -21.00000   -1.20000
AFIX   0
C242  1    0.977391   -0.302856    0.505255   -21.00000    0.14544
AFIX  23
H24E  2    0.948607   -0.288524    0.456263   -21.00000   -1.20000
H24F  2    0.982907   -0.283988    0.548050   -21.00000   -1.20000
AFIX   0
C243  1    0.905672   -0.335237    0.512744   -21.00000    0.15991
AFIX  23
H24G  2    0.913927   -0.357907    0.481667   -21.00000   -1.20000
H24H  2    0.926288   -0.343842    0.567800   -21.00000   -1.20000
AFIX   0
C244  1    0.808316   -0.330298    0.493123   -21.00000    0.18319
AFIX  23
H24I  2    0.793019   -0.319798    0.538349   -21.00000   -1.20000
H24J  2    0.777759   -0.355664    0.478017   -21.00000   -1.20000
AFIX   0
C245  1    0.780062   -0.300657    0.422847   -21.00000    0.18503
AFIX  23
H24K  2    0.715218   -0.296629    0.408944   -21.00000   -1.20000
H24L  2    0.808699   -0.275252    0.441528   -21.00000   -1.20000
AFIX   0
C246  1    0.798071   -0.309748    0.358934   -21.00000    0.15439
AFIX  23
H24M  2    0.858209   -0.300365    0.362514   -21.00000   -1.20000
H24N  2    0.796929   -0.338504    0.352569   -21.00000   -1.20000
AFIX   0
C247  1    0.744316   -0.295014    0.303557   -21.00000    0.08578
AFIX  23
H24O  2    0.732041   -0.268033    0.317133   -21.00000   -1.20000
H24P  2    0.688223   -0.309978    0.290944   -21.00000   -1.20000
AFIX   0
HKLF 4
 
REM  mo_NV008_0m in P2(1)/c
REM R1 =  0.1113 for    8559 Fo > 4sig(Fo)  and  0.1517 for all   12110 data
REM   1238 parameters refined using    258 restraints
 
END  
     
WGHT      0.0179     39.4823 

REM Highest difference peak  0.566,  deepest hole -0.301,  1-sigma level  0.056
Q1    1   0.4810  0.0680  0.2772  11.00000  0.05    0.57
Q2    1   0.3978  0.1500  0.0096  11.00000  0.05    0.41

REM The information below was added by Olex2.
REM
REM R1 = 0.1113 for 8559 Fo > 4sig(Fo) and 0.1517 for all 152847 data
REM n/a parameters refined using n/a restraints
REM Highest difference peak 0.57, deepest hole -0.30
REM Mean Shift 0, Max Shift 0.000.

REM +++ Tabular Listing of Refinement Information +++
REM R1_all = 0.1517
REM R1_gt = 0.1113
REM wR_ref = 0.2348
REM GOOF = 1.117
REM Shift_max = 0.000
REM Shift_mean = 0
REM Reflections_all = 152847
REM Reflections_gt = 8559
REM Parameters = n/a
REM Hole = -0.30
REM Peak = 0.57
REM Flack = n/a

;
_olex2_submission_special_instructions 'No special instructions were received'
loop_
  _refln_index_h
  _refln_index_k
  _refln_index_l
  _refln_F_squared_meas
  _refln_F_squared_sigma
 3 0 0 4.56 0.27
 3 0 0 4.47 0.27
 3 0 0 4.64 0.29
 3 0 0 4.66 0.29
 3 0 0 4.64 0.29
 3 0 0 4.73 0.3
 -3 0 0 4.62 0.27
 -3 0 0 4.72 0.29
 -3 0 0 4.69 0.27
 -3 0 0 4.69 0.29
 -3 0 0 4.71 0.29
 -4 0 0 193.34 11.67
 -4 0 0 189.78 11.88
 4 0 0 193.77 11.87
 -4 0 0 192.34 11.5
 4 0 0 182.07 10.95
 4 0 0 187.83 11.88
 4 0 0 194.81 10.95
 -4 0 0 190.91 10.95
 4 0 0 197.26 11.66
 -4 0 0 192.13 10.95
 5 0 0 15.63 0.94
 -5 0 0 16.52 0.94
 5 0 0 16.78 0.94
 5 0 0 16.08 1
 -5 0 0 16.47 1
 -5 0 0 16.38 1.02
 -5 0 0 16.37 0.94
 5 0 0 16.38 1.02
 -5 0 0 16.57 1.01
 5 0 0 16.74 1.02
 6 0 0 4.19 0.27
 -6 0 0 4.35 0.28
 6 0 0 4.24 0.28
 6 0 0 4.22 0.25
 6 0 0 4.17 0.27
 6 0 0 4.27 0.28
 -6 0 0 4.15 0.25
 -6 0 0 4.19 0.25
 6 0 0 4.19 0.25
 -6 0 0 4.16 0.27
 -6 0 0 4.19 0.28
 7 0 0 0.31 0.06
 -7 0 0 0.3 0.05
 7 0 0 0.21 0.04
 -7 0 0 0.31 0.06
 -7 0 0 0.26 0.07
 -7 0 0 0.33 0.08
 -7 0 0 0.25 0.04
 7 0 0 0.29 0.04
 7 0 0 0.29 0.06
 7 0 0 0.28 0.04
 7 0 0 0.23 0.07
 -8 0 0 3.86 0.28
 8 0 0 3.9 0.23
 8 0 0 3.89 0.25
 -8 0 0 3.87 0.24
 -8 0 0 3.69 0.23
 8 0 0 3.73 0.26
 8 0 0 3.78 0.24
 8 0 0 3.74 0.24
 8 0 0 3.76 0.25
 8 0 0 3.87 0.23
 8 0 0 3.91 0.27
 -8 0 0 4.07 0.27
 -8 0 0 3.9 0.25
 9 0 0 1.45 0.12
 -9 0 0 1.32 0.11
 9 0 0 1.35 0.14
 9 0 0 1.53 0.14
 -9 0 0 1.54 0.12
 9 0 0 1.34 0.12
 9 0 0 1.56 0.11
 -9 0 0 1.38 0.12
 -9 0 0 1.4 0.15
 -9 0 0 1.53 0.15
 -9 0 0 1.46 0.12
 -10 0 0 0.49 0.09
 -10 0 0 0.45 0.1
 -10 0 0 0.42 0.08
 -10 0 0 0.41 0.07
 10 0 0 0.48 0.11
 10 0 0 0.4 0.08
 10 0 0 0.3 0.07
 -10 0 0 0.45 0.11
 10 0 0 0.39 0.07
 11 0 0 0.01 0.1
 -11 0 0 0.03 0.07
 -11 0 0 0.08 0.07
 11 0 0 0.04 0.05
 -11 0 0 0.17 0.1
 11 0 0 0.04 0.04
 -11 0 0 -0.01 0.07
 11 0 0 -0.01 0.07
 -11 0 0 0.01 0.1
 -12 0 0 0.84 0.16
 -12 0 0 1.57 0.18
 -12 0 0 1.32 0.18
 -12 0 0 1.26 0.14
 12 0 0 1.08 0.19
 12 0 0 1.33 0.12
 12 0 0 1.1 0.1
 -13 0 0 1.16 0.15
 -13 0 0 0.85 0.17
 -13 0 0 1.39 0.2
 13 0 0 0.75 0.09
 13 0 0 1.01 0.11
 -14 0 0 0.1 0.15
 14 0 0 0.09 0.06
 14 0 0 0.01 0.05
 -16 0 0 0.02 0.19
 -3 -1 0 0.28 0.04
 -3 -1 0 0.29 0.04
 -3 -1 0 0.29 0.06
 3 -1 0 0.45 0.05
 3 -1 0 0.54 0.06
 3 -1 0 0.46 0.05
 -3 -1 0 0.3 0.06
 -3 -1 0 0.38 0.04
 3 -1 0 0.48 0.05
 3 -1 0 0.48 0.05
 3 -1 0 0.51 0.07
 3 1 0 0.41 0.07
 3 1 0 0.31 0.06
 -3 1 0 0.57 0.07
 -3 1 0 0.51 0.06
 3 1 0 0.31 0.04
 3 1 0 0.36 0.04
 3 1 0 0.31 0.05
 -3 1 0 0.52 0.05
 -3 1 0 0.37 0.05
 3 1 0 0.41 0.04
 3 1 0 0.41 0.04
 -3 1 0 0.49 0.06
 -4 -1 0 33.28 1.85
 -4 -1 0 33.53 1.95
 4 -1 0 30.99 1.97
 4 -1 0 30.79 2
 4 -1 0 30.33 1.85
 4 1 0 33.5 1.97
 -4 1 0 30.85 1.85
 4 1 0 33.87 1.85
 4 1 0 31.83 1.85
 4 1 0 33.73 1.94
 4 1 0 33.69 2
 -4 1 0 31.3 1.95
 4 1 0 33.22 2
 -4 1 0 30.57 2
 5 -1 0 0.66 0.07
 5 -1 0 0.65 0.08
 5 -1 0 0.78 0.06
 5 -1 0 0.78 0.06
 -5 -1 0 0.55 0.06
 -5 -1 0 0.61 0.05
 5 -1 0 0.79 0.06
 5 -1 0 0.74 0.06
 -5 -1 0 0.63 0.08
 -5 -1 0 0.64 0.09
 5 1 0 0.63 0.08
 5 1 0 0.56 0.05
 5 1 0 0.59 0.05
 5 1 0 0.54 0.06
 -5 1 0 0.73 0.06
 -5 1 0 0.83 0.09
 -5 1 0 0.77 0.08
 5 1 0 0.66 0.05
 6 -1 0 2.14 0.15
 6 -1 0 2.22 0.17
 6 -1 0 2.18 0.15
 6 -1 0 2.18 0.14
 6 -1 0 2.37 0.16
 -6 -1 0 2.29 0.14
 -6 -1 0 2.23 0.14
 -6 -1 0 2.34 0.17
 6 -1 0 2.04 0.15
 -6 -1 0 2.49 0.17
 6 -1 0 2.07 0.14
 6 1 0 2.31 0.14
 6 1 0 2.36 0.14
 -6 1 0 2.22 0.18
 6 1 0 2.27 0.17
 6 1 0 2.32 0.15
 -6 1 0 2.13 0.15
 -6 1 0 2.35 0.17
 -6 1 0 2.15 0.14
 6 1 0 2.24 0.16
 -7 -1 0 1.25 0.08
 7 -1 0 0.97 0.09
 -7 -1 0 1.18 0.08
 7 -1 0 0.75 0.11
 -7 -1 0 1.18 0.09
 7 -1 0 1.09 0.11
 7 -1 0 0.86 0.09
 7 -1 0 0.98 0.09
 7 -1 0 0.97 0.09
 -7 -1 0 1.14 0.12
 -7 -1 0 1.07 0.12
 7 1 0 1.14 0.08
 -7 1 0 0.95 0.09
 7 1 0 1.14 0.08
 -7 1 0 1.01 0.12
 7 1 0 1.26 0.1
 -7 1 0 0.9 0.1
 7 1 0 1.11 0.11
 -7 1 0 0.87 0.1
 7 1 0 1.19 0.12
 -7 1 0 0.97 0.12
 -8 -1 0 1.18 0.13
 -8 -1 0 1.18 0.09
 8 -1 0 0.77 0.11
 8 -1 0 0.96 0.09
 -8 -1 0 1.2 0.08
 -8 -1 0 1.08 0.12
 8 -1 0 0.91 0.09
 8 -1 0 1.04 0.09
 8 -1 0 0.85 0.1
 8 -1 0 0.93 0.09
 8 -1 0 0.8 0.13
 -8 -1 0 1.17 0.1
 -8 1 0 1.02 0.11
 -8 1 0 1.06 0.13
 -8 1 0 0.98 0.1
 8 1 0 1.17 0.12
 -8 1 0 0.98 0.12
 8 1 0 1.11 0.12
 8 1 0 1.28 0.1
 8 1 0 1.19 0.09
 -8 1 0 0.98 0.1
 -8 1 0 0.98 0.09
 8 1 0 1.16 0.08
 9 -1 0 1.74 0.13
 9 -1 0 1.65 0.15
 9 -1 0 1.64 0.12
 -9 -1 0 1.81 0.14
 -9 -1 0 1.7 0.17
 -9 -1 0 1.78 0.12
 9 -1 0 1.68 0.12
 9 -1 0 1.73 0.12
 -9 -1 0 1.72 0.16
 9 -1 0 1.74 0.15
 9 -1 0 1.67 0.14
 9 1 0 1.84 0.14
 9 1 0 1.83 0.13
 -9 1 0 1.87 0.13
 -9 1 0 1.84 0.15
 9 1 0 1.68 0.15
 -9 1 0 1.82 0.16
 -9 1 0 1.74 0.16
 -9 1 0 1.62 0.14
 9 1 0 1.64 0.16
 9 1 0 1.84 0.12
 -9 1 0 1.9 0.12
 -10 -1 0 0.2 0.05
 10 -1 0 0.02 0.06
 -10 -1 0 0.08 0.1
 -10 -1 0 0.09 0.05
 -10 -1 0 0.14 0.05
 10 -1 0 0.23 0.05
 10 -1 0 0.31 0.08
 -10 -1 0 0.14 0.09
 -10 -1 0 0.1 0.06
 -10 1 0 0.27 0.11
 10 1 0 0.15 0.04
 10 1 0 0.19 0.08
 -10 1 0 0.25 0.09
 -10 1 0 0.16 0.06
 10 1 0 0.24 0.05
 -10 1 0 0.16 0.05
 10 1 0 -0.04 0.06
 -10 1 0 0.12 0.06
 -10 1 0 0.15 0.06
 11 -1 0 0.25 0.11
 11 -1 0 0.17 0.05
 -11 -1 0 0.19 0.12
 -11 -1 0 0.27 0.1
 -11 -1 0 0.08 0.06
 11 -1 0 0.06 0.07
 11 -1 0 0.3 0.06
 -11 -1 0 0.25 0.06
 -11 -1 0 0.16 0.07
 -11 1 0 0.31 0.07
 11 1 0 0.04 0.07
 -11 1 0 0.1 0.1
 11 1 0 0.24 0.04
 -11 1 0 0.12 0.07
 11 1 0 0.04 0.1
 11 1 0 0.27 0.05
 -11 1 0 0.15 0.1
 12 -1 0 1.01 0.19
 12 -1 0 1.11 0.11
 -12 -1 0 1.27 0.18
 -12 -1 0 0.98 0.14
 -12 -1 0 1.26 0.15
 -12 -1 0 1.64 0.19
 12 -1 0 1.11 0.12
 -12 -1 0 1.36 0.14
 12 1 0 1.36 0.1
 -12 1 0 1.27 0.18
 12 1 0 1.04 0.15
 -12 1 0 1.12 0.14
 12 1 0 1.17 0.09
 12 1 0 1.39 0.19
 -12 1 0 1.24 0.17
 -13 -1 0 1.74 0.16
 -13 -1 0 1.48 0.19
 -13 -1 0 1.92 0.21
 13 -1 0 1.5 0.13
 -13 -1 0 1.73 0.22
 -13 1 0 1.91 0.17
 13 1 0 1.47 0.12
 13 1 0 1.44 0.11
 -14 -1 0 0.18 0.13
 -14 -1 0 -0.03 0.15
 -14 1 0 0.3 0.16
 15 -1 0 0.25 0.07
 -16 -1 0 0.15 0.19
 -16 1 0 -0.21 0.19
 2 -2 0 0.31 0.04
 2 -2 0 0.35 0.04
 2 -2 0 0.38 0.04
 2 2 0 0.39 0.04
 2 2 0 0.39 0.03
 -3 -2 0 46.06 2.73
 3 -2 0 43.62 2.78
 -3 -2 0 46.9 2.56
 3 -2 0 44.55 2.7
 3 -2 0 43.47 2.78
 -3 -2 0 45.85 2.56
 -3 -2 0 44.78 2.7
 3 -2 0 42.9 2.56
 -3 -2 0 45.28 2.7
 3 -2 0 43.86 2.7
 -3 -2 0 45.56 2.78
 3 -2 0 44.26 2.56
 3 -2 0 45.05 2.73
 3 2 0 44.24 2.56
 -3 2 0 43.42 2.73
 -3 2 0 44.34 2.78
 3 2 0 45.11 2.7
 -3 2 0 44.24 2.7
 3 2 0 46.21 2.56
 -3 2 0 44.35 2.56
 3 2 0 45.38 2.7
 3 2 0 46.83 2.73
 -3 2 0 43.46 2.78
 4 -2 0 11.14 0.7
 -4 2 0 11.06 0.69
 -4 2 0 11.07 0.64
 5 2 0 3.64 0.24
 6 -2 0 2.94 0.18
 6 -2 0 2.76 0.18
 6 -2 0 3.03 0.2
 6 -2 0 2.94 0.19
 6 -2 0 2.95 0.19
 -6 -2 0 2.98 0.2
 -6 -2 0 2.68 0.17
 -6 -2 0 2.95 0.2
 -6 -2 0 2.75 0.17
 6 -2 0 2.91 0.2
 -6 2 0 2.9 0.18
 6 2 0 2.87 0.17
 -6 2 0 3.1 0.18
 6 2 0 2.81 0.19
 -6 2 0 2.9 0.2
 6 2 0 2.8 0.2
 -6 2 0 2.95 0.2
 -6 2 0 3.06 0.21
 6 2 0 2.89 0.2
 -6 2 0 2.99 0.2
 7 -2 0 0.56 0.1
 -7 -2 0 0.41 0.06
 -7 -2 0 0.48 0.11
 -7 -2 0 0.46 0.06
 7 -2 0 0.55 0.07
 7 -2 0 0.57 0.08
 7 -2 0 0.52 0.07
 -7 -2 0 0.6 0.1
 7 -2 0 0.76 0.09
 -7 -2 0 0.44 0.07
 7 -2 0 0.59 0.07
 7 -2 0 0.66 0.08
 -7 2 0 0.69 0.07
 7 2 0 0.57 0.09
 7 2 0 0.48 0.06
 -7 2 0 0.59 0.08
 7 2 0 0.54 0.06
 7 2 0 0.51 0.07
 -7 2 0 0.57 0.08
 -7 2 0 0.68 0.12
 -7 2 0 0.75 0.08
 -7 2 0 0.76 0.09
 7 2 0 0.38 0.08
 8 -2 0 0.06 0.04
 -8 -2 0 0.2 0.07
 8 -2 0 0.1 0.04
 8 -2 0 0.1 0.05
 -8 -2 0 0.1 0.04
 -8 -2 0 0.18 0.04
 8 -2 0 0.17 0.07
 8 -2 0 -0.09 0.07
 -8 -2 0 0.18 0.04
 8 -2 0 0.02 0.05
 -8 -2 0 0.15 0.08
 8 -2 0 0.09 0.04
 -8 2 0 0.14 0.05
 -8 2 0 0.09 0.05
 8 2 0 0.19 0.07
 8 2 0 0.11 0.06
 -8 2 0 0.15 0.04
 -8 2 0 0.02 0.08
 8 2 0 0.11 0.03
 -8 2 0 0 0.08
 -8 2 0 0.08 0.05
 8 2 0 0.05 0.05
 9 -2 0 0.3 0.06
 9 -2 0 0.29 0.07
 -9 -2 0 0.25 0.09
 -9 -2 0 0.22 0.04
 9 -2 0 0.27 0.06
 -9 -2 0 0.21 0.05
 9 -2 0 0.41 0.08
 9 -2 0 0.42 0.08
 9 -2 0 0.38 0.07
 -9 -2 0 0.21 0.05
 9 -2 0 0.17 0.08
 -9 -2 0 0.33 0.08
 -9 2 0 0.29 0.09
 9 2 0 0.28 0.06
 -9 2 0 0.33 0.08
 -9 2 0 0.41 0.06
 9 2 0 0.11 0.06
 9 2 0 0.46 0.09
 9 2 0 0.32 0.08
 -9 2 0 0.28 0.05
 -9 2 0 0.31 0.06
 9 2 0 0.17 0.04
 -9 2 0 0.33 0.06
 -10 -2 0 0.86 0.1
 -10 -2 0 0.82 0.13
 -10 -2 0 0.76 0.13
 10 -2 0 0.8 0.09
 -10 -2 0 0.73 0.09
 10 -2 0 0.73 0.12
 10 -2 0 0.75 0.11
 10 -2 0 0.76 0.08
 -10 -2 0 0.76 0.08
 -10 2 0 0.74 0.08
 10 2 0 0.87 0.12
 10 2 0 0.82 0.07
 -10 2 0 0.63 0.11
 -10 2 0 0.74 0.13
 10 2 0 0.64 0.11
 -10 2 0 0.67 0.11
 10 2 0 0.76 0.07
 -11 -2 0 0.01 0.1
 11 -2 0 0.01 0.06
 11 -2 0 0.01 0.05
 -11 -2 0 0.01 0.06
 11 -2 0 0.03 0.1
 -11 -2 0 0.06 0.06
 -11 -2 0 -0.07 0.11
 11 2 0 -0.06 0.1
 -11 2 0 -0.01 0.07
 11 2 0 0 0.04
 -11 2 0 -0.03 0.1
 11 2 0 -0.01 0.07
 11 2 0 -0.03 0.03
 -12 -2 0 -0.13 0.07
 12 -2 0 -0.16 0.08
 12 -2 0 0.04 0.07
 -12 -2 0 0.02 0.13
 -12 -2 0 -0.01 0.12
 12 -2 0 0.08 0.05
 -12 -2 0 0.01 0.08
 12 2 0 -0.02 0.13
 -12 2 0 0.1 0.09
 -12 2 0 0.08 0.09
 12 2 0 -0.05 0.03
 12 2 0 -0.04 0.04
 12 2 0 -0.1 0.08
 -12 2 0 0.05 0.11
 13 -2 0 1.12 0.12
 -13 -2 0 1.27 0.18
 -13 -2 0 1.33 0.19
 13 -2 0 1.16 0.14
 -13 -2 0 1.38 0.14
 13 2 0 1.31 0.17
 -13 2 0 1.55 0.2
 -13 2 0 1.07 0.19
 -14 -2 0 1.64 0.24
 14 -2 0 1.8 0.16
 -14 -2 0 1.65 0.22
 -14 2 0 1.95 0.24
 -15 -2 0 -0.02 0.16
 15 -2 0 0.13 0.08
 15 -2 0 0.07 0.06
 16 -2 0 0.28 0.06
 -16 2 0 0.23 0.21
 -2 -3 0 0.83 0.06
 -2 -3 0 0.74 0.07
 2 -3 0 0.95 0.06
 -2 -3 0 0.79 0.06
 -2 -3 0 0.83 0.05
 -2 -3 0 0.82 0.05
 2 -3 0 0.98 0.07
 2 3 0 0.77 0.07
 2 3 0 0.85 0.06
 2 3 0 0.84 0.05
 2 3 0 0.84 0.06
 2 3 0 0.79 0.06
 2 3 0 0.73 0.07
 -3 -3 0 0.27 0.05
 3 -3 0 0.34 0.08
 3 -3 0 0.31 0.06
 3 -3 0 0.19 0.04
 -3 -3 0 0.21 0.04
 -3 -3 0 0.31 0.04
 -3 -3 0 0.25 0.04
 -3 -3 0 0.28 0.06
 3 -3 0 0.18 0.04
 -3 -3 0 0.21 0.06
 3 -3 0 0.22 0.05
 3 3 0 0.18 0.06
 3 3 0 0.21 0.04
 -3 3 0 0.17 0.04
 3 3 0 0.21 0.03
 3 3 0 0.28 0.03
 3 3 0 0.24 0.05
 -3 3 0 0.21 0.04
 -3 3 0 0.29 0.06
 -3 3 0 0.29 0.06
 4 -3 0 23 1.38
 -4 -3 0 22.55 1.41
 -4 -3 0 23.58 1.38
 -4 -3 0 22.8 1.31
 4 -3 0 23.54 1.43
 4 -3 0 23.02 1.39
 4 -3 0 21.96 1.32
 -4 -3 0 22.36 1.31
 4 -3 0 22.91 1.43
 -4 -3 0 23 1.39
 -4 -3 0 23.35 1.42
 4 3 0 22.93 1.4
 4 3 0 22.29 1.31
 4 3 0 21.85 1.31
 4 3 0 24.19 1.38
 -4 3 0 23.27 1.38
 -4 3 0 22.61 1.43
 -4 3 0 23.54 1.43
 -4 3 0 23.08 1.32
 -4 3 0 22.8 1.41
 5 -3 0 5.73 0.37
 5 -3 0 5.72 0.37
 5 -3 0 5.47 0.34
 5 -3 0 5.61 0.34
 -5 -3 0 6.08 0.34
 5 -3 0 5.48 0.36
 -5 -3 0 6.19 0.34
 5 -3 0 5.7 0.37
 -5 -3 0 6.19 0.37
 -5 3 0 5.54 0.34
 5 3 0 6.08 0.36
 5 3 0 6.17 0.34
 -5 3 0 5.47 0.37
 -5 3 0 5.61 0.34
 -5 3 0 5.43 0.37
 5 3 0 6.14 0.37
 -5 3 0 5.64 0.37
 -6 -3 0 0.07 0.07
 6 -3 0 0.07 0.05
 -6 -3 0 0.06 0.03
 6 -3 0 0 0.03
 6 -3 0 0.03 0.04
 -6 -3 0 0.03 0.02
 6 -3 0 0.01 0.04
 -6 -3 0 0.05 0.03
 6 -3 0 0.06 0.04
 6 -3 0 0.03 0.06
 -6 -3 0 0.09 0.06
 6 -3 0 0 0.04
 -6 3 0 0.01 0.04
 6 3 0 0.07 0.02
 -6 3 0 0.07 0.04
 6 3 0 0.05 0.02
 -6 3 0 0.02 0.03
 -6 3 0 -0.02 0.04
 6 3 0 0 0.04
 -6 3 0 0.13 0.06
 6 3 0 0.11 0.05
 6 3 0 0.07 0.06
 -7 -3 0 0.09 0.07
 -7 -3 0 0.14 0.03
 7 -3 0 0.15 0.08
 7 -3 0 -0.02 0.04
 -7 -3 0 0.13 0.03
 -7 -3 0 0.09 0.08
 7 -3 0 0.02 0.05
 7 -3 0 0.04 0.04
 7 -3 0 0.06 0.04
 7 -3 0 0.09 0.04
 -7 -3 0 0.13 0.03
 7 -3 0 0.16 0.06
 -7 3 0 0.1 0.05
 -7 3 0 0.19 0.05
 7 3 0 0.02 0.06
 7 3 0 0.09 0.03
 -7 3 0 0.1 0.04
 7 3 0 0.09 0.04
 7 3 0 0.13 0.03
 -7 3 0 0.07 0.04
 7 3 0 0.12 0.06
 -7 3 0 0.19 0.07
 8 -3 0 1.69 0.13
 -8 -3 0 1.64 0.15
 8 -3 0 1.75 0.13
 8 -3 0 1.57 0.13
 -8 -3 0 1.86 0.16
 -8 -3 0 1.76 0.13
 8 -3 0 1.78 0.13
 8 -3 0 1.45 0.15
 8 -3 0 1.52 0.13
 8 -3 0 1.68 0.14
 -8 -3 0 1.64 0.11
 8 3 0 1.72 0.11
 -8 3 0 1.67 0.15
 -8 3 0 1.74 0.14
 -8 3 0 1.77 0.13
 8 3 0 1.69 0.13
 8 3 0 1.54 0.14
 -8 3 0 1.69 0.12
 8 3 0 1.66 0.11
 8 3 0 1.43 0.14
 -9 -3 0 0.14 0.1
 9 -3 0 0.12 0.05
 9 -3 0 0.17 0.05
 -9 -3 0 0.2 0.04
 9 -3 0 0.1 0.04
 9 -3 0 0.11 0.05
 9 -3 0 0.12 0.06
 -9 -3 0 0.13 0.08
 -9 -3 0 0.17 0.05
 9 -3 0 0.17 0.08
 -9 -3 0 0.19 0.04
 9 3 0 0.11 0.05
 9 3 0 0.33 0.07
 9 3 0 0.16 0.07
 -9 3 0 0.16 0.05
 -9 3 0 0.09 0.06
 9 3 0 0.22 0.04
 9 3 0 0.21 0.03
 -9 3 0 0.09 0.07
 -9 3 0 0.2 0.05
 -10 -3 0 0.43 0.1
 -10 -3 0 0.4 0.06
 10 -3 0 0.2 0.05
 10 -3 0 0.2 0.06
 10 -3 0 0.35 0.08
 10 -3 0 0.19 0.05
 -10 -3 0 0.27 0.05
 -10 -3 0 0.28 0.11
 10 3 0 0.38 0.09
 -10 3 0 0.16 0.06
 -10 3 0 0.27 0.1
 -10 3 0 0.17 0.07
 -10 3 0 0.18 0.05
 10 3 0 0.29 0.04
 10 3 0 0.33 0.05
 11 -3 0 0.06 0.04
 -11 -3 0 0.19 0.1
 11 -3 0 -0.02 0.07
 -11 -3 0 0.12 0.06
 -11 -3 0 0.12 0.11
 11 -3 0 0 0.05
 -11 -3 0 0.18 0.06
 11 -3 0 0.12 0.04
 11 3 0 0.22 0.11
 -11 3 0 0.15 0.08
 -11 3 0 -0.02 0.07
 -11 3 0 -0.01 0.1
 -12 -3 0 0.52 0.09
 -12 -3 0 0.5 0.08
 12 -3 0 0.81 0.1
 -12 -3 0 0.54 0.13
 -12 -3 0 0.64 0.15
 12 -3 0 0.47 0.08
 -12 3 0 0.68 0.15
 12 3 0 0.47 0.09
 -12 3 0 0.45 0.11
 -12 3 0 0.78 0.16
 12 3 0 0.59 0.14
 -13 -3 0 2.1 0.17
 -13 -3 0 1.77 0.21
 -13 -3 0 2.19 0.25
 13 -3 0 2.32 0.18
 13 -3 0 2.27 0.16
 -13 -3 0 2.58 0.24
 -13 3 0 2.16 0.23
 13 3 0 1.79 0.2
 -13 3 0 2.59 0.24
 14 -3 0 1.94 0.16
 -14 -3 0 2.11 0.24
 -14 -3 0 2.02 0.23
 14 -3 0 2.11 0.18
 -14 3 0 2.28 0.24
 -15 -3 0 0.16 0.16
 15 -3 0 0.01 0.07
 -15 -3 0 -0.17 0.14
 -15 3 0 0.12 0.17
 16 -3 0 0.11 0.07
 -16 -3 0 0.17 0.18
 -16 3 0 0.35 0.2
 2 -4 0 6.35 0.42
 -2 -4 0 6.95 0.41
 2 -4 0 6.16 0.39
 -2 -4 0 6.68 0.4
 -2 -4 0 6.7 0.38
 -2 -4 0 6.6 0.4
 -2 4 0 6.42 0.39
 -2 4 0 6.16 0.4
 2 4 0 6.89 0.41
 2 4 0 6.78 0.38
 2 4 0 6.66 0.41
 -3 -4 0 4.36 0.26
 -3 -4 0 4.24 0.28
 -3 -4 0 4.57 0.27
 -3 -4 0 4.41 0.28
 3 4 0 4.36 0.27
 3 4 0 4.36 0.26
 3 4 0 4.39 0.28
 3 4 0 4.29 0.28
 4 -4 0 0.37 0.06
 -4 -4 0 0.35 0.06
 4 -4 0 0.32 0.06
 4 -4 0 0.3 0.07
 -4 -4 0 0.44 0.04
 -4 -4 0 0.47 0.04
 -4 -4 0 0.54 0.06
 4 -4 0 0.57 0.07
 4 -4 0 0.36 0.06
 4 4 0 0.52 0.06
 -4 4 0 0.42 0.06
 4 4 0 0.49 0.06
 4 4 0 0.54 0.07
 -4 4 0 0.3 0.06
 -4 4 0 0.33 0.07
 4 4 0 0.35 0.04
 -4 4 0 0.36 0.06
 -5 -4 0 0.35 0.04
 -5 -4 0 0.36 0.08
 -5 -4 0 0.31 0.04
 5 -4 0 0.26 0.06
 5 -4 0 0.31 0.06
 5 -4 0 0.27 0.05
 -5 -4 0 0.34 0.06
 5 -4 0 0.25 0.05
 -5 -4 0 0.33 0.04
 -5 -4 0 0.42 0.06
 5 -4 0 0.47 0.08
 -5 4 0 0.25 0.06
 -5 4 0 0.29 0.06
 5 4 0 0.27 0.06
 5 4 0 0.31 0.05
 -5 4 0 0.29 0.06
 5 4 0 0.28 0.07
 5 4 0 0.35 0.03
 -5 4 0 0.34 0.07
 6 -4 0 8.08 0.49
 -6 -4 0 7.59 0.49
 -6 -4 0 7.35 0.45
 -6 -4 0 7.38 0.45
 6 -4 0 8.29 0.46
 -6 -4 0 7.65 0.49
 6 -4 0 8.02 0.5
 6 -4 0 8.02 0.48
 6 -4 0 8.03 0.5
 -6 -4 0 7.63 0.49
 6 -4 0 8.2 0.46
 -6 4 0 8.35 0.49
 -6 4 0 8.04 0.46
 6 4 0 7.64 0.49
 6 4 0 7.53 0.49
 -6 4 0 7.95 0.5
 6 4 0 7.43 0.45
 6 4 0 7.33 0.48
 -6 4 0 7.89 0.46
 -7 -4 0 2.14 0.16
 -7 -4 0 2.19 0.14
 7 -4 0 1.88 0.15
 7 -4 0 1.98 0.15
 7 -4 0 1.87 0.17
 -7 -4 0 2.13 0.13
 7 -4 0 1.83 0.15
 7 -4 0 1.96 0.14
 7 -4 0 1.99 0.16
 -7 -4 0 2.25 0.13
 -7 -4 0 2.36 0.18
 7 4 0 2.08 0.16
 7 4 0 2 0.15
 -7 4 0 2.09 0.16
 -7 4 0 2.08 0.16
 7 4 0 2.14 0.17
 7 4 0 2.04 0.12
 -7 4 0 1.99 0.15
 -7 4 0 1.95 0.14
 8 -4 0 3.26 0.21
 8 -4 0 3.25 0.24
 -8 -4 0 3.33 0.22
 8 -4 0 3.26 0.22
 -8 -4 0 3.23 0.23
 8 -4 0 3.37 0.21
 -8 -4 0 3.17 0.2
 -8 -4 0 3.51 0.25
 8 -4 0 3.14 0.22
 8 -4 0 3.2 0.23
 8 4 0 3.25 0.19
 -8 4 0 3.28 0.21
 8 4 0 3.36 0.19
 -8 4 0 3.36 0.24
 8 4 0 3.07 0.23
 -8 4 0 3.12 0.22
 8 4 0 3.45 0.22
 8 4 0 3.18 0.23
 -8 4 0 3.41 0.23
 9 -4 0 0.18 0.05
 -9 -4 0 0.31 0.07
 -9 -4 0 0.25 0.04
 -9 -4 0 0.32 0.1
 9 -4 0 0.22 0.06
 9 -4 0 0.02 0.08
 -9 -4 0 0.19 0.08
 9 -4 0 0.2 0.05
 9 -4 0 0.25 0.06
 -9 -4 0 0.3 0.06
 -9 4 0 0.2 0.08
 9 4 0 0.18 0.03
 9 4 0 0.2 0.07
 9 4 0 0.17 0.08
 -9 4 0 0.12 0.05
 9 4 0 0.21 0.04
 9 4 0 0.19 0.06
 -9 4 0 0.23 0.05
 -9 4 0 0.14 0.07
 -10 -4 0 3.19 0.23
 10 -4 0 2.88 0.21
 10 -4 0 2.95 0.21
 10 -4 0 3 0.21
 -10 -4 0 3.13 0.19
 -10 -4 0 2.97 0.19
 -10 -4 0 2.99 0.25
 -10 -4 0 3.09 0.21
 10 -4 0 3.11 0.2
 10 -4 0 2.87 0.21
 -10 4 0 2.95 0.23
 -10 4 0 2.89 0.22
 -10 4 0 3.06 0.21
 10 4 0 2.92 0.23
 -10 4 0 2.96 0.23
 11 -4 0 0.03 0.06
 11 -4 0 0.05 0.05
 -11 -4 0 0.05 0.05
 11 -4 0 -0.01 0.07
 11 -4 0 -0.05 0.05
 -11 -4 0 -0.02 0.11
 -11 -4 0 -0.04 0.05
 -11 -4 0 0.17 0.1
 -11 -4 0 0.03 0.06
 11 4 0 0.07 0.07
 11 4 0 -0.05 0.1
 -11 4 0 0.11 0.1
 -11 4 0 0.04 0.08
 -11 4 0 -0.11 0.07
 -11 4 0 -0.07 0.08
 12 -4 0 -0.06 0.05
 12 -4 0 0.06 0.08
 12 -4 0 0 0.06
 -12 -4 0 -0.14 0.06
 12 -4 0 -0.02 0.05
 -12 -4 0 -0.12 0.11
 -12 -4 0 0.05 0.12
 -12 -4 0 -0.03 0.07
 -12 4 0 -0.01 0.09
 -12 4 0 -0.07 0.12
 12 4 0 0.09 0.13
 -13 -4 0 0.42 0.08
 -13 -4 0 0.62 0.15
 13 -4 0 0.73 0.13
 -13 -4 0 0.32 0.1
 -13 -4 0 0.87 0.18
 13 -4 0 0.55 0.1
 -13 4 0 0.4 0.12
 -14 -4 0 0.05 0.1
 -14 -4 0 0.25 0.14
 -14 -4 0 -0.03 0.15
 14 -4 0 0.14 0.09
 14 -4 0 0.09 0.07
 -14 4 0 0.11 0.13
 -14 4 0 0.02 0.14
 15 -4 0 0.13 0.07
 -15 -4 0 0.29 0.18
 -15 -4 0 -0.04 0.16
 15 -4 0 0.15 0.1
 -15 4 0 0.15 0.17
 -16 -4 0 -0.26 0.18
 16 -4 0 -0.04 0.07
 -16 -4 0 0.16 0.19
 0 5 0 0.06 0.03
 1 -5 0 0.17 0.04
 1 -5 0 0.11 0.04
 1 -5 0 0.16 0.03
 -1 -5 0 0.13 0.03
 1 -5 0 0.12 0.03
 -1 -5 0 0.19 0.04
 -1 -5 0 0.18 0.04
 1 -5 0 0.13 0.03
 -1 5 0 0.13 0.03
 1 5 0 0.24 0.04
 -1 5 0 0.16 0.03
 -1 5 0 0.17 0.04
 1 5 0 0.2 0.04
 1 5 0 0.13 0.03
 -1 5 0 0.11 0.03
 -1 5 0 0.14 0.03
 1 5 0 0.19 0.04
 1 5 0 0.13 0.03
 -2 -5 0 0.41 0.06
 -2 -5 0 0.52 0.05
 2 -5 0 0.39 0.08
 2 -5 0 0.41 0.07
 2 -5 0 0.54 0.08
 -2 -5 0 0.48 0.07
 2 -5 0 0.53 0.07
 2 -5 0 0.43 0.06
 -2 -5 0 0.45 0.06
 -2 -5 0 0.55 0.06
 -2 5 0 0.43 0.07
 -2 5 0 0.38 0.07
 2 5 0 0.43 0.05
 2 5 0 0.48 0.05
 2 5 0 0.52 0.05
 2 5 0 0.44 0.06
 2 5 0 0.49 0.05
 -2 5 0 0.44 0.07
 -2 5 0 0.46 0.08
 2 5 0 0.6 0.07
 -2 5 0 0.46 0.08
 -3 -5 0 52.05 3.19
 -3 -5 0 49.81 3.1
 3 -5 0 53.62 2.95
 -3 -5 0 49.67 3.1
 -3 -5 0 49.53 2.94
 3 -5 0 50.41 2.95
 3 5 0 52.08 3.1
 3 5 0 52.12 3.14
 3 5 0 50.39 2.94
 -3 5 0 49.33 2.95
 3 5 0 53.46 3.1
 -3 5 0 52.91 3.2
 -3 5 0 52.85 3.2
 3 5 0 51.79 3.19
 -4 -5 0 25.8 1.56
 4 -5 0 25.59 1.46
 -4 -5 0 26.47 1.58
 -4 -5 0 26.09 1.54
 4 -5 0 24.45 1.46
 4 -5 0 24.79 1.53
 -4 5 0 24.1 1.46
 -4 5 0 24.88 1.53
 4 5 0 25.8 1.54
 -4 5 0 24.99 1.59
 4 5 0 25.27 1.46
 4 5 0 25.88 1.56
 4 5 0 26.12 1.46
 -4 5 0 25.48 1.59
 -5 -5 0 0.06 0.04
 -5 -5 0 0.06 0.02
 5 -5 0 0 0.04
 -5 -5 0 0 0.02
 -5 -5 0 -0.02 0.04
 5 -5 0 0.04 0.04
 5 -5 0 0.01 0.06
 5 -5 0 0.05 0.04
 -5 -5 0 0.04 0.02
 5 -5 0 0.03 0.03
 -5 -5 0 -0.01 0.06
 5 -5 0 0.07 0.04
 -5 5 0 0.06 0.03
 -5 5 0 0.01 0.04
 5 5 0 0 0.05
 5 5 0 0.01 0.02
 -5 5 0 -0.01 0.05
 5 5 0 0.07 0.02
 -5 5 0 0.01 0.03
 5 5 0 0.03 0.03
 -5 5 0 -0.03 0.04
 -6 -5 0 0.12 0.06
 6 -5 0 0.02 0.04
 -6 -5 0 0.13 0.04
 -6 -5 0 0.14 0.07
 6 -5 0 -0.02 0.04
 -6 -5 0 0.12 0.03
 6 -5 0 0.04 0.04
 -6 -5 0 0.05 0.03
 6 -5 0 0.02 0.07
 6 -5 0 0.01 0.04
 -6 -5 0 0.08 0.03
 6 -5 0 0 0.05
 -6 5 0 0 0.04
 -6 5 0 0.03 0.04
 6 5 0 0.04 0.06
 -6 5 0 -0.1 0.05
 6 5 0 0.06 0.04
 -6 5 0 0.08 0.04
 6 5 0 0.08 0.02
 6 5 0 0.09 0.05
 -6 5 0 0.02 0.06
 6 5 0 0.1 0.02
 7 -5 0 5.77 0.37
 -7 -5 0 5.51 0.33
 -7 -5 0 5.89 0.38
 -7 -5 0 5.81 0.37
 7 -5 0 5.75 0.34
 7 -5 0 5.65 0.37
 7 -5 0 5.53 0.37
 -7 -5 0 5.68 0.36
 -7 -5 0 5.56 0.33
 7 -5 0 5.74 0.34
 7 -5 0 5.82 0.36
 -7 5 0 5.8 0.35
 7 5 0 5.49 0.33
 -7 5 0 5.91 0.37
 7 5 0 5.44 0.37
 7 5 0 5.44 0.36
 -7 5 0 5.54 0.37
 -7 5 0 5.79 0.38
 7 5 0 5.61 0.37
 -7 5 0 5.73 0.34
 -8 -5 0 0.05 0.03
 8 -5 0 0.04 0.06
 8 -5 0 0.01 0.08
 -8 -5 0 0.17 0.08
 8 -5 0 0.1 0.05
 -8 -5 0 0.11 0.04
 -8 -5 0 0.11 0.04
 -8 -5 0 0.06 0.07
 8 -5 0 0.07 0.05
 8 -5 0 0.08 0.05
 -8 -5 0 0.14 0.03
 8 5 0 0.15 0.03
 -8 5 0 0.08 0.05
 -8 5 0 0.06 0.06
 8 5 0 0.04 0.06
 8 5 0 0.13 0.05
 -8 5 0 0.12 0.05
 -8 5 0 0.02 0.06
 -8 5 0 0.16 0.08
 8 5 0 0.06 0.06
 9 -5 0 0.22 0.07
 -9 -5 0 0.22 0.09
 9 -5 0 0.27 0.06
 9 -5 0 0.2 0.06
 9 -5 0 0.24 0.09
 -9 -5 0 0.22 0.05
 -9 -5 0 0.26 0.04
 -9 -5 0 0.3 0.05
 -9 -5 0 0.36 0.08
 9 -5 0 0.2 0.06
 9 -5 0 0.23 0.06
 -9 -5 0 0.27 0.04
 -9 5 0 0.14 0.06
 9 5 0 0.27 0.08
 -9 5 0 0.34 0.09
 -9 5 0 0.19 0.07
 -9 5 0 0.15 0.07
 9 5 0 0.24 0.08
 -9 5 0 0.28 0.05
 10 -5 0 0.71 0.11
 -10 -5 0 0.72 0.1
 10 -5 0 0.67 0.11
 10 -5 0 0.79 0.11
 10 -5 0 0.52 0.09
 -10 -5 0 0.79 0.15
 -10 -5 0 0.65 0.13
 -10 -5 0 0.72 0.07
 -10 -5 0 0.71 0.08
 -10 -5 0 0.83 0.1
 10 -5 0 0.84 0.1
 10 5 0 0.64 0.12
 -10 5 0 0.59 0.12
 -10 5 0 0.67 0.11
 -10 5 0 0.84 0.13
 -10 5 0 0.73 0.13
 10 5 0 0.66 0.11
 -11 -5 0 0.74 0.08
 -11 -5 0 0.77 0.09
 -11 -5 0 0.71 0.11
 11 -5 0 0.76 0.13
 11 -5 0 0.68 0.12
 11 -5 0 0.54 0.1
 11 -5 0 0.73 0.1
 11 -5 0 0.91 0.13
 -11 -5 0 0.83 0.15
 -11 -5 0 0.96 0.14
 -11 5 0 0.95 0.14
 -11 5 0 0.81 0.15
 11 5 0 0.7 0.15
 -11 5 0 0.79 0.14
 11 5 0 0.72 0.12
 -11 5 0 0.87 0.15
 12 -5 0 1.26 0.12
 12 -5 0 1.4 0.17
 12 -5 0 1.44 0.13
 -12 -5 0 1.11 0.11
 12 -5 0 1.44 0.14
 -12 -5 0 1.12 0.18
 -12 -5 0 1.12 0.14
 -12 -5 0 1.33 0.18
 -12 5 0 1.35 0.17
 12 5 0 1.26 0.15
 -12 5 0 1.43 0.17
 -12 5 0 1.25 0.18
 12 5 0 1.28 0.19
 13 -5 0 0.17 0.06
 13 -5 0 0.15 0.06
 -13 -5 0 -0.02 0.13
 -13 -5 0 0.26 0.13
 -13 -5 0 0.12 0.08
 13 -5 0 0.04 0.09
 -13 -5 0 0.11 0.08
 -13 -5 0 0.19 0.07
 -13 5 0 0.22 0.14
 -13 5 0 0.16 0.12
 -14 -5 0 0.09 0.15
 14 -5 0 0.16 0.07
 -14 -5 0 0.34 0.15
 14 -5 0 0.16 0.1
 -14 -5 0 0.13 0.11
 -14 5 0 0.29 0.13
 -14 5 0 0.17 0.15
 15 -5 0 0 0.1
 -15 -5 0 -0.03 0.17
 -15 -5 0 -0.17 0.15
 15 -5 0 0.03 0.07
 -15 5 0 -0.07 0.16
 16 -5 0 0.23 0.08
 -16 -5 0 0.16 0.17
 -16 5 0 0.16 0.16
 0 -6 0 1.59 0.11
 0 -6 0 1.43 0.1
 0 -6 0 1.46 0.11
 0 -6 0 1.4 0.11
 0 6 0 1.43 0.11
 0 6 0 1.54 0.11
 0 6 0 1.33 0.1
 0 6 0 1.51 0.11
 0 6 0 1.38 0.1
 -1 -6 0 0.24 0.06
 1 -6 0 0.35 0.07
 1 -6 0 0.21 0.05
 -1 -6 0 0.39 0.06
 1 -6 0 0.26 0.05
 1 -6 0 0.27 0.06
 -1 -6 0 0.29 0.05
 -1 -6 0 0.25 0.06
 1 6 0 0.3 0.06
 1 6 0 0.27 0.05
 -1 6 0 0.19 0.05
 -1 6 0 0.35 0.07
 1 6 0 0.25 0.06
 -1 6 0 0.31 0.06
 1 6 0 0.16 0.04
 1 6 0 0.24 0.06
 -1 6 0 0.16 0.04
 2 -6 0 3.26 0.2
 2 -6 0 3.28 0.21
 2 -6 0 3.07 0.19
 -2 -6 0 2.84 0.2
 2 -6 0 3.24 0.2
 2 -6 0 3.19 0.21
 -2 -6 0 2.9 0.19
 -2 -6 0 2.83 0.2
 2 6 0 3.09 0.2
 -2 6 0 3.36 0.22
 2 6 0 2.82 0.2
 -2 6 0 3 0.2
 -2 6 0 3.2 0.22
 2 6 0 3.13 0.19
 2 6 0 3.3 0.2
 2 6 0 2.98 0.2
 -2 6 0 3.18 0.2
 2 6 0 2.86 0.19
 -3 -6 0 4.38 0.25
 -3 -6 0 4.39 0.27
 -3 -6 0 4.15 0.27
 -3 -6 0 4.18 0.27
 -3 -6 0 4.39 0.25
 3 -6 0 4.12 0.26
 3 6 0 4.04 0.27
 3 6 0 4.07 0.27
 -3 6 0 4.44 0.28
 3 6 0 4.09 0.25
 3 6 0 4.06 0.25
 3 6 0 4.18 0.27
 4 -6 0 2.6 0.17
 4 -6 0 2.79 0.18
 4 -6 0 2.79 0.17
 -4 -6 0 2.51 0.15
 -4 -6 0 2.4 0.18
 4 -6 0 2.72 0.17
 -4 -6 0 2.56 0.15
 -4 -6 0 2.38 0.17
 -4 -6 0 2.36 0.17
 -4 -6 0 2.54 0.17
 -4 6 0 2.58 0.17
 -4 6 0 2.58 0.18
 -4 6 0 2.54 0.18
 4 6 0 2.32 0.15
 -4 6 0 2.55 0.16
 4 6 0 2.46 0.17
 4 6 0 2.44 0.16
 4 6 0 2.48 0.17
 -5 -6 0 1.27 0.1
 -5 -6 0 1.26 0.09
 -5 -6 0 1.21 0.08
 -5 -6 0 1.22 0.11
 5 -6 0 1.06 0.1
 -5 -6 0 1.18 0.1
 5 -6 0 1.14 0.1
 5 -6 0 1.1 0.11
 5 -6 0 1.11 0.11
 5 -6 0 1.17 0.1
 5 -6 0 1.12 0.1
 -5 6 0 1.17 0.1
 5 6 0 1.41 0.1
 -5 6 0 1.08 0.11
 5 6 0 1.25 0.08
 5 6 0 1.19 0.08
 -5 6 0 1.07 0.1
 -5 6 0 1.08 0.1
 -5 6 0 1.11 0.1
 5 6 0 1.28 0.1
 -6 -6 0 2.12 0.17
 6 -6 0 2.23 0.15
 -6 -6 0 2.07 0.13
 -6 -6 0 2.37 0.16
 6 -6 0 2.02 0.16
 -6 -6 0 2.06 0.15
 6 -6 0 2.16 0.16
 6 -6 0 1.98 0.15
 6 -6 0 2.03 0.17
 6 -6 0 2.01 0.15
 -6 -6 0 2.07 0.13
 6 6 0 2.06 0.15
 6 6 0 2.1 0.15
 -6 6 0 2.25 0.15
 -6 6 0 1.95 0.15
 6 6 0 2.35 0.16
 6 6 0 2.13 0.13
 -6 6 0 2.01 0.16
 6 6 0 2.14 0.13
 -6 6 0 2.03 0.17
 -6 6 0 2.05 0.17
 7 -6 0 1.46 0.14
 7 -6 0 1.73 0.13
 7 -6 0 1.6 0.15
 -7 -6 0 1.75 0.11
 7 -6 0 1.63 0.14
 -7 -6 0 1.85 0.16
 7 -6 0 1.38 0.14
 -7 -6 0 1.86 0.12
 7 6 0 1.74 0.15
 7 6 0 1.78 0.14
 -7 6 0 1.41 0.13
 -7 6 0 1.53 0.15
 -7 6 0 1.57 0.14
 7 6 0 2.01 0.14
 7 6 0 1.76 0.1
 -7 6 0 1.63 0.15
 -8 -6 0 0.61 0.08
 -8 -6 0 0.86 0.14
 8 -6 0 0.95 0.09
 -8 -6 0 0.63 0.07
 -8 -6 0 0.7 0.11
 -8 -6 0 0.58 0.06
 8 -6 0 0.93 0.1
 8 -6 0 0.91 0.11
 -8 -6 0 0.64 0.08
 8 -6 0 0.82 0.11
 8 -6 0 0.73 0.12
 -8 6 0 0.92 0.12
 -8 6 0 0.89 0.1
 -8 6 0 0.83 0.09
 8 6 0 0.57 0.1
 -8 6 0 0.71 0.11
 8 6 0 0.56 0.1
 9 -6 0 -0.06 0.06
 -9 -6 0 0.1 0.08
 -9 -6 0 0.04 0.04
 9 -6 0 0.05 0.08
 9 -6 0 0.09 0.05
 -9 -6 0 0.08 0.04
 -9 -6 0 0.14 0.1
 9 -6 0 0.02 0.06
 9 -6 0 0.05 0.05
 -9 -6 0 0.04 0.03
 9 -6 0 0.01 0.07
 -9 -6 0 0.15 0.04
 -9 6 0 0.07 0.07
 -9 6 0 -0.03 0.07
 -9 6 0 0.03 0.05
 9 6 0 0.04 0.06
 -9 6 0 0.05 0.07
 9 6 0 0.06 0.07
 -9 6 0 0.04 0.06
 9 6 0 0.07 0.07
 -10 -6 0 0.6 0.07
 10 -6 0 0.83 0.12
 -10 -6 0 0.63 0.09
 10 -6 0 0.63 0.12
 10 -6 0 0.61 0.1
 10 -6 0 0.74 0.1
 -10 -6 0 0.49 0.07
 10 -6 0 0.56 0.12
 -10 -6 0 0.71 0.14
 -10 -6 0 0.78 0.15
 -10 -6 0 0.69 0.1
 -10 6 0 0.92 0.13
 -10 6 0 0.7 0.14
 -10 6 0 0.6 0.11
 10 6 0 0.58 0.11
 -10 6 0 0.73 0.12
 10 6 0 0.63 0.12
 11 -6 0 0.58 0.1
 11 -6 0 0.27 0.08
 11 -6 0 0.32 0.09
 -11 -6 0 0.3 0.11
 -11 -6 0 0.3 0.05
 11 -6 0 0.41 0.09
 -11 -6 0 0.32 0.12
 -11 -6 0 0.32 0.06
 -11 -6 0 0.14 0.05
 11 -6 0 0.23 0.06
 -11 -6 0 0.26 0.07
 11 6 0 0.27 0.08
 -11 6 0 0.37 0.1
 -11 6 0 0.25 0.08
 11 6 0 0.19 0.11
 -11 6 0 0.62 0.13
 -11 6 0 0.45 0.11
 -12 -6 0 0.06 0.14
 12 -6 0 0.05 0.07
 -12 -6 0 0.06 0.07
 12 -6 0 0.07 0.09
 12 -6 0 0.05 0.09
 12 -6 0 0.1 0.07
 -12 -6 0 -0.05 0.07
 -12 -6 0 0.03 0.05
 -12 -6 0 0.21 0.12
 12 -6 0 0 0.06
 12 6 0 0.02 0.08
 -12 6 0 0.04 0.11
 -12 6 0 -0.03 0.1
 12 6 0 0.13 0.13
 -13 -6 0 0 0.06
 -13 -6 0 -0.15 0.08
 -13 -6 0 -0.03 0.08
 -13 -6 0 -0.28 0.14
 13 -6 0 -0.06 0.06
 13 -6 0 -0.11 0.1
 -13 -6 0 -0.07 0.13
 13 -6 0 0 0.07
 13 -6 0 -0.04 0.09
 13 -6 0 0.01 0.07
 -13 6 0 -0.1 0.13
 -13 6 0 0.04 0.11
 -14 -6 0 -0.12 0.1
 14 -6 0 0.14 0.08
 14 -6 0 -0.03 0.1
 -14 -6 0 -0.1 0.14
 14 -6 0 -0.02 0.06
 -14 -6 0 0.15 0.16
 -14 6 0 0.09 0.13
 14 6 0 -0.16 0.09
 15 -6 0 0.12 0.08
 -15 -6 0 0.12 0.17
 -15 -6 0 -0.01 0.15
 15 -6 0 0.15 0.11
 -15 6 0 0.1 0.16
 -1 -7 0 33.11 2.08
 1 -7 0 32.58 2.08
 1 -7 0 31.91 1.92
 1 -7 0 34.52 2.08
 -1 -7 0 32.86 2.02
 -1 -7 0 34.62 1.92
 1 -7 0 34.58 1.92
 1 7 0 34.03 2.02
 -1 7 0 31.68 2.08
 -1 7 0 33.41 1.92
 1 7 0 34.57 2.08
 1 7 0 34.9 1.92
 -1 7 0 32.8 2.08
 -1 7 0 32.99 2.02
 -2 -7 0 2.86 0.2
 2 -7 0 3.29 0.21
 -2 -7 0 3.04 0.21
 2 -7 0 2.9 0.2
 -2 -7 0 2.87 0.21
 2 -7 0 3.37 0.22
 2 -7 0 3.07 0.2
 -2 -7 0 3.2 0.19
 2 -7 0 3.27 0.22
 -2 7 0 3.24 0.21
 2 7 0 3.11 0.21
 2 7 0 2.86 0.21
 -2 7 0 3.17 0.22
 -2 7 0 3.39 0.22
 2 7 0 2.78 0.21
 2 7 0 2.92 0.19
 -2 7 0 3.09 0.2
 2 7 0 3.35 0.19
 -2 7 0 3.35 0.2
 3 -7 0 20.51 1.31
 -3 -7 0 21.71 1.31
 -3 -7 0 22.01 1.35
 3 -7 0 21.78 1.35
 -3 -7 0 20.57 1.24
 -3 -7 0 21.56 1.31
 3 -7 0 23 1.25
 -3 -7 0 21.13 1.24
 3 -7 0 20.95 1.25
 -3 7 0 22.88 1.25
 -3 7 0 21.1 1.31
 3 7 0 22.77 1.35
 -3 7 0 20.29 1.35
 3 7 0 21.69 1.33
 3 7 0 21.39 1.31
 3 7 0 22.97 1.35
 3 7 0 21.3 1.24
 -4 -7 0 2.25 0.14
 -4 -7 0 2.15 0.16
 -4 -7 0 2.13 0.15
 -4 -7 0 2.29 0.15
 -4 -7 0 2.21 0.14
 4 7 0 2.21 0.14
 4 7 0 2.15 0.15
 4 7 0 2.07 0.15
 4 7 0 2.23 0.14
 4 7 0 2.27 0.15
 5 -7 0 1.65 0.13
 -5 -7 0 1.52 0.12
 -5 -7 0 1.54 0.1
 5 -7 0 1.53 0.12
 -5 -7 0 1.73 0.13
 5 -7 0 1.67 0.12
 5 -7 0 1.68 0.13
 -5 -7 0 1.58 0.1
 -5 -7 0 1.46 0.12
 5 -7 0 1.64 0.12
 5 7 0 1.65 0.12
 -5 7 0 1.66 0.12
 5 7 0 1.85 0.12
 -5 7 0 1.42 0.13
 -5 7 0 1.6 0.13
 -5 7 0 1.48 0.12
 -5 7 0 1.8 0.13
 -5 7 0 1.64 0.12
 5 7 0 1.52 0.1
 5 7 0 1.54 0.1
 6 -7 0 5.75 0.36
 -6 -7 0 5.43 0.36
 -6 -7 0 5.37 0.36
 6 7 0 5.26 0.35
 -6 7 0 6.13 0.34
 6 7 0 5.2 0.36
 6 7 0 5.37 0.32
 -6 7 0 6 0.36
 -7 -7 0 12.77 0.75
 -7 -7 0 12.63 0.7
 -7 -7 0 12.94 0.76
 7 -7 0 11.87 0.75
 7 -7 0 12.05 0.77
 -7 -7 0 12.51 0.76
 7 -7 0 11.76 0.71
 7 -7 0 11.8 0.74
 7 -7 0 11.37 0.71
 -7 7 0 11.65 0.77
 -7 7 0 11.67 0.77
 7 7 0 12.54 0.7
 -7 7 0 11.92 0.76
 7 7 0 12.84 0.75
 -7 7 0 11.43 0.71
 -8 -7 0 0.91 0.12
 8 -7 0 0.73 0.1
 8 -7 0 0.72 0.11
 -8 -7 0 0.79 0.07
 8 -7 0 0.72 0.11
 -8 -7 0 0.76 0.08
 8 -7 0 0.89 0.1
 -8 -7 0 0.81 0.08
 -8 -7 0 0.78 0.07
 8 -7 0 0.79 0.11
 -8 -7 0 0.89 0.11
 8 -7 0 0.55 0.11
 8 7 0 0.86 0.11
 -8 7 0 0.51 0.12
 -8 7 0 0.71 0.09
 -8 7 0 0.73 0.1
 8 7 0 0.84 0.1
 -8 7 0 0.74 0.12
 8 7 0 0.88 0.1
 9 -7 0 0.02 0.09
 -9 -7 0 0.13 0.08
 -9 -7 0 0.14 0.04
 9 -7 0 0.04 0.07
 9 -7 0 0.1 0.06
 9 -7 0 -0.02 0.07
 -9 -7 0 0.1 0.04
 9 -7 0 0.04 0.06
 -9 -7 0 0.17 0.04
 -9 -7 0 0.05 0.03
 9 -7 0 0 0.06
 -9 -7 0 0.19 0.1
 -9 7 0 0.1 0.06
 -9 7 0 0.09 0.08
 -9 7 0 -0.01 0.07
 -9 7 0 0.13 0.05
 -9 7 0 0.16 0.08
 9 7 0 0.1 0.07
 9 7 0 0.05 0.06
 9 7 0 0.16 0.08
 10 -7 0 0.43 0.09
 -10 -7 0 0.49 0.1
 -10 -7 0 0.52 0.09
 -10 -7 0 0.33 0.07
 10 -7 0 0.4 0.07
 10 -7 0 0.39 0.08
 -10 -7 0 0.35 0.08
 -10 -7 0 0.38 0.06
 10 -7 0 0.48 0.09
 -10 -7 0 0.48 0.12
 10 -7 0 0.4 0.08
 10 7 0 0.39 0.08
 -10 7 0 0.32 0.09
 -10 7 0 0.31 0.07
 -10 7 0 0.48 0.11
 10 7 0 0.31 0.1
 -10 7 0 0.61 0.13
 -11 -7 0 -0.09 0.04
 11 -7 0 0.07 0.08
 11 -7 0 0.04 0.08
 -11 -7 0 0.02 0.05
 11 -7 0 -0.07 0.06
 -11 -7 0 -0.05 0.1
 11 -7 0 0.03 0.07
 -11 -7 0 -0.04 0.06
 -11 -7 0 0.02 0.06
 11 -7 0 0.07 0.09
 -11 -7 0 0.14 0.11
 -11 7 0 0.07 0.1
 -11 7 0 0.08 0.1
 11 7 0 -0.02 0.07
 11 7 0 0.05 0.11
 -11 7 0 0.06 0.1
 -12 -7 0 2.37 0.2
 12 -7 0 2.56 0.19
 -12 -7 0 2.31 0.16
 12 -7 0 2.86 0.21
 -12 -7 0 2.48 0.2
 12 -7 0 2.49 0.2
 -12 -7 0 2.65 0.24
 12 -7 0 2.63 0.22
 12 -7 0 2.77 0.22
 -12 -7 0 2.7 0.23
 -12 7 0 2.63 0.22
 12 7 0 2.3 0.21
 12 7 0 2.11 0.24
 -13 -7 0 0.08 0.08
 13 -7 0 0.01 0.07
 13 -7 0 -0.02 0.07
 -13 -7 0 -0.1 0.08
 -13 -7 0 0.01 0.06
 13 -7 0 0.09 0.09
 -13 -7 0 -0.23 0.13
 -13 -7 0 0.12 0.13
 -13 7 0 0.02 0.13
 13 7 0 -0.14 0.09
 -14 -7 0 0.1 0.1
 -14 -7 0 0.03 0.14
 -14 -7 0 0.1 0.16
 14 -7 0 -0.02 0.07
 14 -7 0 -0.07 0.1
 14 -7 0 0.07 0.08
 -14 7 0 -0.04 0.15
 -14 7 0 -0.07 0.12
 -15 -7 0 -0.21 0.17
 15 -7 0 -0.02 0.08
 -15 -7 0 0 0.15
 -15 7 0 -0.09 0.16
 0 -8 0 949.26 59.7
 0 -8 0 972.56 59.7
 0 -8 0 1000 57.89
 0 8 0 928.05 57.89
 1 -8 0 0.38 0.08
 -1 -8 0 0.36 0.08
 -1 -8 0 0.52 0.08
 1 -8 0 0.4 0.1
 -1 -8 0 0.25 0.05
 -1 -8 0 0.25 0.05
 -1 -8 0 0.37 0.08
 1 -8 0 0.4 0.07
 1 8 0 0.36 0.07
 1 8 0 0.47 0.08
 1 8 0 0.44 0.08
 1 8 0 0.41 0.07
 -1 8 0 0.46 0.09
 -1 8 0 0.41 0.08
 1 8 0 0.62 0.08
 2 -8 0 26.24 1.58
 -2 -8 0 24.39 1.57
 2 -8 0 26.21 1.46
 2 8 0 24.35 1.57
 -3 -8 0 2.63 0.17
 -3 -8 0 2.58 0.17
 3 -8 0 2.62 0.17
 3 -8 0 2.7 0.18
 -3 8 0 2.58 0.17
 -3 8 0 2.49 0.18
 -3 8 0 2.35 0.17
 -3 8 0 2.36 0.17
 3 8 0 2.54 0.17
 3 8 0 2.72 0.17
 3 8 0 2.57 0.17
 -3 8 0 2.46 0.18
 3 8 0 2.62 0.18
 3 8 0 2.61 0.16
 -4 -8 0 2.67 0.16
 -4 -8 0 2.78 0.16
 -4 -8 0 2.51 0.18
 4 -8 0 2.86 0.18
 4 -8 0 2.79 0.17
 4 8 0 2.53 0.18
 4 8 0 2.61 0.16
 4 8 0 2.53 0.17
 -4 8 0 2.76 0.19
 -4 8 0 2.85 0.18
 4 8 0 2.41 0.18
 -4 8 0 2.8 0.19
 4 8 0 2.56 0.18
 4 8 0 2.52 0.16
 -4 8 0 2.86 0.17
 5 -8 0 0.2 0.06
 5 -8 0 0.27 0.06
 -5 -8 0 0.29 0.05
 -5 -8 0 0.29 0.05
 5 -8 0 0.17 0.05
 5 -8 0 0.25 0.06
 -5 -8 0 0.25 0.07
 -5 -8 0 0.27 0.06
 -5 -8 0 0.27 0.04
 5 8 0 0.27 0.05
 5 8 0 0.28 0.05
 5 8 0 0.27 0.06
 5 8 0 0.21 0.05
 -5 8 0 0.22 0.05
 -5 8 0 0.18 0.06
 -5 8 0 0.24 0.05
 -5 8 0 0.19 0.05
 5 8 0 0.26 0.04
 -5 8 0 0.16 0.07
 5 8 0 0.27 0.04
 -5 8 0 0.27 0.06
 -6 -8 0 6.27 0.37
 -6 -8 0 6.36 0.41
 -6 -8 0 6.49 0.41
 6 8 0 6.47 0.41
 6 8 0 6.16 0.4
 7 -8 0 3.34 0.21
 7 -8 0 3.33 0.22
 7 -8 0 3.3 0.23
 -7 -8 0 3.27 0.24
 -7 -8 0 3.1 0.22
 7 -8 0 3.42 0.23
 -7 -8 0 2.9 0.22
 7 8 0 3.03 0.22
 -7 8 0 3.37 0.24
 -7 8 0 3.14 0.22
 -7 8 0 3.29 0.23
 7 8 0 2.94 0.22
 7 8 0 3.12 0.22
 7 8 0 2.87 0.19
 -7 8 0 3.16 0.21
 8 -8 0 0.11 0.06
 -8 -8 0 0.06 0.08
 8 -8 0 0.12 0.06
 8 -8 0 0.09 0.06
 -8 -8 0 0.07 0.04
 8 -8 0 0.11 0.06
 -8 -8 0 0.04 0.04
 -8 -8 0 0.01 0.04
 8 -8 0 0.01 0.07
 -8 -8 0 0.08 0.03
 8 -8 0 0.03 0.07
 -8 -8 0 -0.02 0.06
 -8 -8 0 0.11 0.08
 -8 8 0 0.07 0.06
 8 8 0 0.06 0.07
 -8 8 0 0.16 0.06
 8 8 0 0.06 0.02
 -8 8 0 0.02 0.07
 -8 8 0 0.12 0.05
 -8 8 0 0.09 0.07
 8 8 0 0.07 0.02
 8 8 0 0.08 0.06
 9 -8 0 1.53 0.15
 -9 -8 0 1.47 0.12
 -9 -8 0 1.39 0.12
 9 -8 0 1.53 0.17
 -9 -8 0 1.58 0.15
 -9 -8 0 1.38 0.1
 9 -8 0 1.46 0.14
 9 -8 0 1.38 0.13
 -9 -8 0 1.55 0.16
 9 -8 0 1.67 0.15
 9 -8 0 1.59 0.15
 -9 -8 0 1.65 0.11
 9 8 0 1.55 0.14
 9 8 0 1.5 0.15
 -9 8 0 1.46 0.13
 -9 8 0 1.42 0.14
 9 8 0 1.25 0.14
 -9 8 0 1.67 0.16
 10 -8 0 1.08 0.14
 -10 -8 0 0.91 0.13
 -10 -8 0 0.91 0.08
 -10 -8 0 0.75 0.1
 10 -8 0 1 0.12
 -10 -8 0 0.81 0.1
 10 -8 0 0.97 0.11
 -10 -8 0 0.81 0.16
 10 -8 0 0.9 0.14
 10 -8 0 1.01 0.14
 -10 -8 0 0.69 0.08
 -10 8 0 0.91 0.14
 -10 8 0 1.23 0.13
 10 8 0 0.73 0.12
 10 8 0 0.8 0.14
 -10 8 0 0.82 0.12
 11 -8 0 0.47 0.1
 -11 -8 0 0.57 0.1
 -11 -8 0 0.48 0.07
 -11 -8 0 0.52 0.07
 -11 -8 0 0.6 0.14
 11 -8 0 0.68 0.15
 -11 -8 0 0.62 0.14
 11 -8 0 0.52 0.1
 11 -8 0 0.56 0.09
 11 -8 0 0.51 0.11
 -11 -8 0 0.49 0.11
 -11 8 0 0.58 0.11
 11 8 0 0.55 0.09
 -11 8 0 0.46 0.1
 11 8 0 0.54 0.12
 -11 8 0 0.6 0.13
 12 -8 0 0.1 0.1
 -12 -8 0 0.04 0.05
 -12 -8 0 0.13 0.11
 12 -8 0 0.09 0.09
 12 -8 0 0.04 0.07
 12 -8 0 0.08 0.1
 -12 -8 0 -0.04 0.07
 -12 -8 0 0.14 0.13
 -12 -8 0 0 0.07
 12 8 0 -0.14 0.09
 -12 8 0 0.07 0.1
 -12 8 0 0.13 0.11
 12 8 0 -0.05 0.13
 13 -8 0 0.07 0.09
 13 -8 0 0.1 0.1
 13 -8 0 0.14 0.11
 -13 -8 0 0.08 0.08
 13 -8 0 -0.06 0.07
 -13 -8 0 -0.02 0.05
 13 -8 0 -0.13 0.07
 -13 -8 0 0.11 0.13
 -13 -8 0 -0.12 0.16
 -13 -8 0 -0.11 0.08
 -13 8 0 -0.09 0.1
 -13 8 0 -0.03 0.12
 14 -8 0 0.05 0.08
 14 -8 0 0.06 0.11
 -14 -8 0 0.18 0.14
 14 -8 0 0.26 0.08
 -14 -8 0 0.15 0.1
 -14 -8 0 0.2 0.15
 14 8 0 0.07 0.11
 -14 8 0 0.1 0.12
 -14 8 0 0.11 0.16
 -15 -8 0 -0.13 0.14
 -15 -8 0 0.05 0.17
 15 -8 0 0 0.09
 -15 8 0 0.01 0.16
 1 -9 0 0.51 0.09
 -1 -9 0 0.65 0.08
 1 -9 0 0.85 0.1
 -1 -9 0 0.62 0.08
 1 -9 0 0.78 0.08
 1 9 0 0.64 0.09
 1 9 0 0.52 0.08
 -1 9 0 0.64 0.08
 -1 9 0 0.51 0.08
 -1 9 0 0.68 0.09
 1 9 0 0.71 0.09
 -1 9 0 0.81 0.1
 1 9 0 0.6 0.08
 -1 9 0 0.76 0.08
 2 -9 0 8.58 0.54
 -2 -9 0 9.65 0.56
 2 -9 0 8.76 0.54
 -2 -9 0 9.67 0.58
 -2 9 0 8.93 0.54
 2 9 0 9.15 0.58
 -3 -9 0 4.72 0.32
 3 -9 0 4.89 0.31
 3 -9 0 4.81 0.31
 -3 -9 0 4.89 0.33
 3 -9 0 4.75 0.33
 -3 -9 0 5.29 0.3
 3 -9 0 4.96 0.32
 -3 -9 0 5.39 0.3
 -3 -9 0 4.99 0.32
 -3 -9 0 5.22 0.32
 -3 9 0 4.94 0.31
 -3 9 0 5.24 0.33
 3 9 0 5.22 0.3
 3 9 0 5.25 0.3
 3 9 0 5.38 0.32
 3 9 0 4.66 0.32
 -3 9 0 5 0.31
 3 9 0 5.25 0.32
 4 -9 0 0.82 0.1
 -4 -9 0 0.8 0.08
 4 -9 0 0.61 0.09
 -4 -9 0 0.86 0.07
 4 -9 0 0.51 0.09
 -4 -9 0 0.73 0.07
 4 -9 0 0.69 0.08
 -4 -9 0 0.68 0.07
 -4 -9 0 0.88 0.07
 -4 -9 0 0.8 0.09
 4 9 0 0.79 0.07
 4 9 0 0.83 0.09
 4 9 0 0.73 0.07
 -4 9 0 0.6 0.08
 -4 9 0 0.59 0.09
 -4 9 0 0.67 0.09
 -4 9 0 0.6 0.1
 4 9 0 0.81 0.07
 4 9 0 0.74 0.07
 -5 -9 0 1.06 0.09
 -5 -9 0 1.2 0.11
 5 -9 0 1.06 0.11
 5 -9 0 1.16 0.12
 -5 -9 0 1.2 0.08
 -5 -9 0 1.2 0.09
 5 -9 0 1.13 0.11
 5 -9 0 1.3 0.11
 -5 -9 0 1.19 0.11
 5 -9 0 1.18 0.11
 -5 9 0 1.16 0.11
 5 9 0 1 0.1
 -5 9 0 1.36 0.11
 5 9 0 1.14 0.09
 5 9 0 1.1 0.08
 5 9 0 0.96 0.11
 5 9 0 1.16 0.08
 -5 9 0 1.08 0.1
 -5 9 0 1.18 0.11
 5 9 0 1.14 0.11
 5 9 0 1.16 0.08
 -6 -9 0 5.27 0.32
 -6 -9 0 4.87 0.31
 6 -9 0 4.62 0.33
 6 -9 0 4.36 0.31
 -6 -9 0 5.14 0.29
 6 9 0 4.85 0.29
 -6 9 0 4.47 0.31
 -6 9 0 4.48 0.31
 6 9 0 5.01 0.32
 6 9 0 5.1 0.29
 6 9 0 5.11 0.32
 -7 -9 0 0.31 0.09
 7 -9 0 0.21 0.06
 7 -9 0 0.09 0.07
 -7 -9 0 0.17 0.04
 -7 -9 0 0.21 0.04
 -7 -9 0 0.46 0.09
 -7 -9 0 0.1 0.04
 7 -9 0 0.08 0.06
 7 -9 0 0.11 0.06
 7 -9 0 0.15 0.06
 7 -9 0 0.18 0.08
 -7 9 0 0.13 0.06
 7 9 0 0.06 0.06
 -7 9 0 0.2 0.06
 7 9 0 0.21 0.06
 7 9 0 0.2 0.07
 7 9 0 0.21 0.03
 -7 9 0 0.13 0.05
 -7 9 0 0.2 0.08
 -7 9 0 0.16 0.07
 -8 -9 0 4.29 0.25
 8 -9 0 4.34 0.27
 -8 -9 0 4.46 0.29
 8 -9 0 4.11 0.29
 8 -9 0 4.16 0.3
 -8 -9 0 4.62 0.29
 8 -9 0 4.41 0.3
 8 -9 0 3.91 0.28
 -8 -9 0 4.37 0.3
 8 -9 0 3.91 0.28
 -8 -9 0 4.26 0.26
 -8 -9 0 4.26 0.28
 -8 9 0 3.98 0.29
 8 9 0 4.06 0.25
 8 9 0 4.3 0.29
 8 9 0 4.37 0.29
 -8 9 0 4.26 0.31
 -8 9 0 4.31 0.28
 -8 9 0 4.41 0.27
 8 9 0 4.37 0.25
 -8 9 0 4.31 0.29
 8 9 0 4.35 0.29
 -9 -9 0 1.46 0.12
 9 -9 0 1.33 0.15
 9 -9 0 1.53 0.15
 -9 -9 0 1.4 0.13
 9 -9 0 1.52 0.14
 -9 -9 0 1.5 0.16
 -9 -9 0 1.5 0.1
 -9 -9 0 1.51 0.11
 -9 -9 0 1.68 0.16
 9 -9 0 1.52 0.15
 9 -9 0 1.44 0.16
 -9 9 0 1.3 0.16
 9 9 0 1.55 0.14
 -9 9 0 1.64 0.16
 9 9 0 1.44 0.15
 -9 9 0 1.41 0.15
 10 -9 0 0.48 0.1
 -10 -9 0 0.48 0.07
 -10 -9 0 0.68 0.16
 10 -9 0 0.65 0.14
 -10 -9 0 0.36 0.09
 10 -9 0 0.72 0.11
 -10 -9 0 0.58 0.08
 10 -9 0 0.55 0.12
 -10 -9 0 0.39 0.09
 -10 -9 0 0.92 0.14
 10 -9 0 0.61 0.13
 10 9 0 0.45 0.09
 -10 9 0 0.75 0.12
 -10 9 0 0.59 0.14
 10 9 0 0.8 0.13
 11 -9 0 0.34 0.08
 11 -9 0 0.33 0.1
 11 -9 0 0.37 0.09
 -11 -9 0 0.37 0.07
 -11 -9 0 0.45 0.11
 -11 -9 0 0.34 0.12
 11 -9 0 0.36 0.09
 -11 -9 0 0.32 0.07
 -11 -9 0 0.26 0.07
 11 -9 0 0.26 0.08
 11 9 0 0.3 0.09
 11 9 0 0.32 0.13
 -11 9 0 0.31 0.1
 -11 9 0 0.53 0.12
 -12 -9 0 0 0.07
 12 -9 0 0.19 0.1
 -12 -9 0 0.05 0.05
 12 -9 0 0.21 0.11
 12 -9 0 0.14 0.08
 -12 -9 0 0.2 0.12
 12 -9 0 0.21 0.1
 -12 9 0 0.2 0.13
 12 9 0 0 0.09
 12 9 0 -0.08 0.13
 -12 9 0 0.15 0.11
 -13 -9 0 0.18 0.14
 -13 -9 0 -0.04 0.13
 13 -9 0 0.02 0.08
 13 -9 0 0.14 0.11
 13 -9 0 -0.19 0.08
 13 -9 0 0.04 0.11
 -13 9 0 0.02 0.11
 -13 9 0 -0.04 0.15
 14 -9 0 0.17 0.09
 -14 -9 0 0.27 0.18
 14 -9 0 0.21 0.09
 -14 -9 0 0.05 0.15
 -14 9 0 0.31 0.14
 -14 9 0 0.21 0.16
 15 -9 0 0.08 0.09
 -15 -9 0 0.04 0.15
 -15 -9 0 0.1 0.16
 15 -9 0 0 0.09
 0 -10 0 5.8 0.38
 0 10 0 5.71 0.36
 0 10 0 6.02 0.39
 0 10 0 6.42 0.36
 -1 -10 0 0.42 0.08
 -1 -10 0 0.38 0.06
 1 -10 0 0.59 0.07
 1 -10 0 0.57 0.07
 1 -10 0 0.54 0.08
 1 -10 0 0.4 0.07
 -1 -10 0 0.44 0.07
 1 10 0 0.37 0.07
 -1 10 0 0.46 0.08
 -1 10 0 0.48 0.08
 1 10 0 0.44 0.07
 -2 -10 0 1.06 0.09
 2 -10 0 1.09 0.1
 -2 -10 0 1.07 0.09
 2 -10 0 1.05 0.09
 2 -10 0 0.96 0.11
 2 -10 0 1.06 0.1
 -2 -10 0 1.03 0.1
 2 -10 0 0.99 0.1
 -2 -10 0 1.03 0.09
 2 10 0 1.05 0.09
 2 10 0 1.21 0.1
 -2 10 0 1.07 0.1
 2 10 0 1.03 0.09
 -2 10 0 0.93 0.09
 -2 10 0 0.96 0.1
 2 10 0 1.07 0.09
 3 -10 0 0.95 0.1
 3 -10 0 1.19 0.1
 3 -10 0 1.11 0.1
 -3 -10 0 0.93 0.08
 -3 -10 0 0.95 0.09
 3 -10 0 1.08 0.09
 -3 -10 0 0.8 0.09
 -3 -10 0 0.91 0.09
 3 -10 0 1.17 0.11
 -3 -10 0 0.87 0.09
 -3 10 0 0.96 0.09
 3 10 0 0.97 0.1
 3 10 0 0.81 0.08
 -3 10 0 0.89 0.1
 -3 10 0 1.16 0.1
 3 10 0 0.83 0.08
 -3 10 0 1.07 0.11
 3 10 0 0.74 0.08
 -4 -10 0 0.32 0.07
 -4 -10 0 0.37 0.07
 4 -10 0 0.43 0.08
 -4 -10 0 0.42 0.06
 4 -10 0 0.38 0.07
 4 -10 0 0.28 0.06
 -4 -10 0 0.27 0.07
 -4 -10 0 0.32 0.06
 -4 -10 0 0.21 0.04
 4 10 0 0.26 0.06
 -4 10 0 0.5 0.09
 -4 10 0 0.29 0.06
 -4 10 0 0.4 0.07
 4 10 0 0.29 0.06
 4 10 0 0.42 0.08
 -4 10 0 0.5 0.08
 4 10 0 0.27 0.06
 4 10 0 0.3 0.06
 -4 10 0 0.38 0.09
 4 10 0 0.22 0.05
 -5 -10 0 1.98 0.16
 5 -10 0 1.98 0.17
 -5 -10 0 2.13 0.14
 -5 -10 0 1.99 0.15
 5 -10 0 2.3 0.16
 5 -10 0 2.1 0.16
 -5 -10 0 2.19 0.14
 5 -10 0 2.19 0.17
 -5 -10 0 1.84 0.16
 5 -10 0 2.11 0.16
 5 10 0 1.88 0.16
 5 10 0 2.21 0.14
 -5 10 0 2.33 0.16
 -5 10 0 2.09 0.16
 -5 10 0 2.07 0.15
 -5 10 0 2.26 0.16
 5 10 0 1.91 0.14
 5 10 0 1.92 0.16
 5 10 0 2.26 0.14
 5 10 0 1.92 0.16
 -5 10 0 2.11 0.17
 6 -10 0 1.43 0.14
 6 -10 0 1.42 0.13
 -6 -10 0 1.58 0.15
 -6 -10 0 1.16 0.09
 6 -10 0 1.59 0.13
 -6 -10 0 1.42 0.13
 6 -10 0 1.56 0.13
 -6 -10 0 1.26 0.1
 -6 -10 0 1.21 0.11
 -6 10 0 1.41 0.12
 -6 10 0 1.51 0.13
 -6 10 0 1.57 0.15
 6 10 0 1.23 0.1
 6 10 0 1.19 0.09
 6 10 0 1.45 0.13
 6 10 0 1.28 0.1
 6 10 0 1.3 0.12
 6 10 0 1.33 0.12
 -6 10 0 1.24 0.14
 6 10 0 1.29 0.09
 -7 -10 0 8.04 0.52
 7 -10 0 8.52 0.49
 7 -10 0 8.62 0.51
 7 -10 0 8.62 0.53
 -7 -10 0 7.74 0.48
 -7 -10 0 7.58 0.51
 7 -10 0 8.5 0.52
 -7 10 0 8.69 0.53
 -7 10 0 8.64 0.53
 7 10 0 7.71 0.48
 7 10 0 7.57 0.52
 7 10 0 7.53 0.52
 -7 10 0 8.62 0.51
 -7 10 0 8.18 0.5
 -7 10 0 8.62 0.49
 7 10 0 8.36 0.52
 -7 10 0 8.3 0.54
 -8 -10 0 0.71 0.14
 8 -10 0 0.91 0.11
 8 -10 0 0.82 0.12
 -8 -10 0 0.66 0.08
 8 -10 0 0.78 0.12
 -8 -10 0 0.68 0.09
 8 -10 0 0.87 0.11
 -8 -10 0 0.85 0.12
 8 -10 0 0.74 0.11
 -8 -10 0 0.86 0.07
 -8 10 0 0.72 0.13
 -8 10 0 0.67 0.12
 8 10 0 0.9 0.11
 -8 10 0 0.75 0.11
 8 10 0 0.78 0.06
 8 10 0 0.66 0.1
 -8 10 0 0.92 0.11
 -8 10 0 0.59 0.09
 8 10 0 0.94 0.11
 -8 10 0 0.78 0.1
 8 10 0 0.75 0.06
 9 -10 0 0.49 0.1
 9 -10 0 0.6 0.13
 9 -10 0 0.59 0.1
 9 -10 0 0.58 0.13
 -9 -10 0 0.69 0.12
 -9 -10 0 0.55 0.07
 9 -10 0 0.43 0.08
 -9 -10 0 0.43 0.09
 -9 -10 0 0.38 0.09
 -9 -10 0 0.82 0.14
 -9 -10 0 0.54 0.06
 9 10 0 0.62 0.12
 9 10 0 0.49 0.1
 -9 10 0 0.46 0.1
 -9 10 0 0.69 0.11
 -9 10 0 0.56 0.11
 9 10 0 0.56 0.12
 -10 -10 0 0.1 0.04
 10 -10 0 0 0.07
 -10 -10 0 -0.01 0.05
 -10 -10 0 0.03 0.06
 -10 -10 0 0.08 0.09
 10 -10 0 0.05 0.07
 10 -10 0 0.14 0.09
 -10 -10 0 0.17 0.1
 -10 -10 0 0.09 0.05
 10 -10 0 0.05 0.09
 10 -10 0 0.12 0.08
 -10 10 0 0.05 0.08
 10 10 0 0.07 0.08
 10 10 0 0.16 0.1
 -10 10 0 0.06 0.1
 11 -10 0 0.93 0.14
 11 -10 0 1.07 0.17
 -11 -10 0 0.71 0.12
 -11 -10 0 1.07 0.12
 -11 -10 0 0.98 0.15
 11 -10 0 0.9 0.13
 11 -10 0 0.9 0.17
 11 -10 0 1.12 0.18
 -11 -10 0 1.02 0.1
 -11 -10 0 1.07 0.17
 -11 10 0 1.23 0.17
 11 10 0 1.13 0.15
 11 10 0 1.03 0.17
 -12 -10 0 0.16 0.07
 -12 -10 0 0.55 0.13
 12 -10 0 0.37 0.09
 -12 -10 0 0.26 0.08
 12 -10 0 0.37 0.11
 -12 -10 0 0.32 0.07
 12 -10 0 0.2 0.09
 12 -10 0 0.29 0.11
 12 -10 0 0.38 0.11
 12 10 0 0.32 0.1
 12 10 0 0.35 0.14
 -12 10 0 0.52 0.14
 -12 10 0 0.3 0.11
 -13 -10 0 0.17 0.14
 13 -10 0 0.06 0.08
 13 -10 0 0.05 0.13
 -13 -10 0 0.06 0.08
 13 -10 0 -0.06 0.09
 13 -10 0 0.17 0.12
 -13 -10 0 0.09 0.13
 -13 10 0 0.21 0.12
 -14 -10 0 0.13 0.15
 14 -10 0 0.23 0.1
 -14 -10 0 0.12 0.15
 14 -10 0 0.24 0.09
 -14 10 0 0.13 0.16
 -14 10 0 0.28 0.14
 -15 -10 0 0 0.16
 15 -10 0 -0.03 0.1
 -15 -10 0 -0.09 0.16
 15 -10 0 -0.03 0.09
 -15 10 0 0.04 0.17
 0 -11 0 0.31 0.08
 0 -11 0 0.23 0.05
 0 -11 0 0.34 0.07
 0 -11 0 0.36 0.08
 0 -11 0 0.31 0.07
 0 11 0 0.34 0.08
 0 11 0 0.28 0.05
 0 11 0 0.42 0.08
 1 -11 0 1.43 0.11
 -1 -11 0 1.36 0.11
 -1 -11 0 1.38 0.11
 -1 -11 0 1.41 0.11
 1 -11 0 1.37 0.11
 1 -11 0 1.35 0.12
 -1 11 0 1.29 0.11
 -1 11 0 1.28 0.11
 1 11 0 1.27 0.11
 -1 11 0 1.28 0.12
 -1 11 0 1.54 0.11
 1 11 0 1.36 0.11
 1 11 0 1.12 0.11
 1 11 0 1.23 0.12
 -1 11 0 1.29 0.11
 -2 -11 0 1.41 0.11
 2 -11 0 1.08 0.12
 2 -11 0 1.09 0.11
 -2 -11 0 1.31 0.11
 2 -11 0 1.29 0.11
 -2 -11 0 1.18 0.11
 2 -11 0 1.13 0.11
 -2 -11 0 1.37 0.11
 -2 -11 0 1.28 0.1
 2 -11 0 1.28 0.11
 -2 11 0 1.12 0.11
 2 11 0 1.26 0.1
 2 11 0 1.48 0.12
 2 11 0 1.32 0.11
 2 11 0 1.26 0.11
 -2 11 0 1.21 0.1
 2 11 0 1.34 0.1
 -2 11 0 1.13 0.11
 -2 11 0 1.12 0.11
 3 -11 0 3.49 0.24
 -3 -11 0 3.98 0.25
 -3 -11 0 3.99 0.25
 -3 -11 0 4.09 0.23
 -3 -11 0 4.11 0.26
 3 -11 0 3.8 0.26
 3 -11 0 3.76 0.25
 -3 -11 0 3.75 0.25
 3 -11 0 3.55 0.24
 3 11 0 3.99 0.25
 3 11 0 3.76 0.23
 -3 11 0 3.55 0.26
 3 11 0 3.67 0.25
 -3 11 0 4 0.25
 -3 11 0 3.63 0.27
 -3 11 0 3.45 0.24
 3 11 0 4.09 0.24
 -4 -11 0 15.4 0.95
 -4 -11 0 15.38 0.93
 4 -11 0 16.21 0.96
 -4 -11 0 15.19 0.95
 -4 -11 0 15.52 0.93
 -4 -11 0 14.69 0.88
 4 -11 0 15.73 0.89
 -4 -11 0 14.65 0.88
 4 -11 0 14.98 0.93
 4 11 0 15.28 0.95
 -4 11 0 15.3 0.96
 -4 11 0 14.9 0.89
 4 11 0 14.89 0.88
 -4 11 0 15.27 0.89
 4 11 0 14.93 0.88
 4 11 0 15.24 0.93
 4 11 0 14.87 0.95
 5 -11 0 0.11 0.07
 5 -11 0 0.08 0.06
 -5 -11 0 0.07 0.04
 5 -11 0 0.07 0.06
 5 -11 0 0.08 0.05
 -5 -11 0 0.13 0.04
 -5 -11 0 0.11 0.06
 -5 -11 0 0.08 0.04
 -5 -11 0 0.07 0.07
 5 -11 0 0.05 0.06
 -5 -11 0 0.13 0.05
 5 11 0 0.03 0.05
 5 11 0 0.08 0.06
 5 11 0 0.16 0.04
 -5 11 0 0.09 0.05
 -5 11 0 0.12 0.07
 -5 11 0 0.2 0.07
 -5 11 0 0.17 0.06
 5 11 0 0.13 0.04
 5 11 0 0.16 0.04
 5 11 0 0.15 0.04
 5 11 0 0.1 0.06
 -5 11 0 0.18 0.06
 6 -11 0 0.49 0.1
 6 -11 0 0.37 0.08
 -6 -11 0 0.47 0.09
 6 -11 0 0.71 0.1
 6 -11 0 0.36 0.07
 -6 -11 0 0.38 0.07
 -6 -11 0 0.39 0.08
 -6 -11 0 0.4 0.06
 -6 -11 0 0.45 0.1
 -6 -11 0 0.43 0.07
 6 -11 0 0.49 0.1
 6 11 0 0.42 0.06
 -6 11 0 0.57 0.1
 -6 11 0 0.56 0.11
 -6 11 0 0.45 0.09
 6 11 0 0.35 0.06
 -6 11 0 0.48 0.07
 6 11 0 0.36 0.07
 6 11 0 0.42 0.08
 6 11 0 0.43 0.08
 -6 11 0 0.56 0.11
 -6 11 0 0.36 0.09
 6 11 0 0.51 0.1
 7 -11 0 1.54 0.13
 7 -11 0 1.5 0.14
 -7 -11 0 1.38 0.1
 7 -11 0 1.28 0.14
 7 -11 0 1.51 0.15
 -7 -11 0 1.31 0.11
 -7 -11 0 1.66 0.14
 -7 -11 0 1.37 0.11
 7 -11 0 1.47 0.14
 -7 -11 0 1.52 0.14
 -7 11 0 1.35 0.15
 7 11 0 1.42 0.13
 -7 11 0 1.28 0.12
 7 11 0 1.41 0.13
 -7 11 0 1.43 0.14
 7 11 0 1.37 0.1
 -7 11 0 1.36 0.15
 -7 11 0 1.43 0.13
 -7 11 0 1.27 0.15
 -8 -11 0 0.1 0.04
 -8 -11 0 0.1 0.07
 8 -11 0 0.1 0.06
 -8 -11 0 0.02 0.05
 8 -11 0 0.16 0.09
 8 -11 0 0.01 0.08
 8 -11 0 0.03 0.08
 8 -11 0 0.12 0.07
 -8 -11 0 0.03 0.1
 -8 -11 0 0.08 0.04
 8 -11 0 0.09 0.07
 8 11 0 0.12 0.07
 -8 11 0 0.16 0.09
 8 11 0 0.2 0.07
 8 11 0 0.13 0.03
 -8 11 0 0.11 0.06
 -8 11 0 0.05 0.08
 8 11 0 0.09 0.03
 -8 11 0 0.19 0.09
 -8 11 0 0.06 0.06
 -8 11 0 0.04 0.05
 8 11 0 0.08 0.07
 -9 -11 0 0.31 0.08
 -9 -11 0 0.15 0.05
 -9 -11 0 0.2 0.05
 9 -11 0 0.06 0.09
 -9 -11 0 0.28 0.06
 9 -11 0 0.2 0.08
 9 -11 0 0.08 0.07
 -9 -11 0 0.21 0.11
 9 -11 0 0.14 0.09
 9 -11 0 0.16 0.07
 9 11 0 0.14 0.08
 9 11 0 0.26 0.04
 -9 11 0 0.2 0.07
 9 11 0 0.31 0.08
 -9 11 0 0.12 0.06
 9 11 0 0.22 0.09
 -9 11 0 0.19 0.1
 -9 11 0 0.28 0.09
 9 11 0 0.17 0.03
 -9 11 0 0.27 0.09
 10 -11 0 0.03 0.07
 -10 -11 0 -0.01 0.06
 10 -11 0 0.01 0.09
 -10 -11 0 0.03 0.05
 -10 -11 0 0.16 0.11
 10 -11 0 0.18 0.09
 -10 -11 0 0.06 0.04
 10 -11 0 -0.05 0.07
 -10 11 0 0.08 0.09
 10 11 0 0.07 0.08
 10 11 0 0.17 0.1
 -10 11 0 -0.02 0.08
 11 -11 0 0.05 0.08
 11 -11 0 0.1 0.1
 11 -11 0 0.14 0.1
 -11 -11 0 0.06 0.07
 -11 -11 0 0.06 0.14
 -11 -11 0 0.12 0.11
 11 -11 0 -0.02 0.1
 -11 -11 0 -0.01 0.06
 11 -11 0 -0.01 0.08
 -11 -11 0 0 0.05
 -11 11 0 0.2 0.1
 11 11 0 0.12 0.09
 11 11 0 0.1 0.12
 -11 11 0 0 0.1
 -12 -11 0 -0.03 0.07
 12 -11 0 0.06 0.11
 -12 -11 0 -0.02 0.05
 12 -11 0 -0.04 0.08
 -12 -11 0 -0.02 0.07
 12 -11 0 0.05 0.11
 12 -11 0 -0.02 0.12
 -12 -11 0 0.05 0.12
 12 -11 0 -0.06 0.08
 12 11 0 0.03 0.1
 -12 11 0 -0.07 0.13
 12 11 0 0.02 0.13
 -12 11 0 0.02 0.11
 13 -11 0 0.1 0.1
 -13 -11 0 0.07 0.08
 13 -11 0 0.3 0.13
 13 -11 0 0.18 0.12
 -13 -11 0 0.06 0.16
 -13 -11 0 0.34 0.13
 13 -11 0 0.16 0.09
 -13 11 0 0.26 0.15
 -13 11 0 0.28 0.13
 -14 -11 0 0.48 0.15
 14 -11 0 0.21 0.1
 -14 -11 0 0.44 0.16
 14 -11 0 0.36 0.1
 -14 11 0 0.26 0.14
 15 -11 0 0.2 0.1
 15 -11 0 0.15 0.11
 -15 -11 0 0.18 0.2
 -15 -11 0 0.2 0.17
 -15 11 0 0.27 0.16
 0 12 0 17.42 1.04
 0 12 0 17.75 1.09
 0 12 0 18.61 1.13
 1 -12 0 0.01 0.05
 1 -12 0 0.18 0.05
 1 -12 0 0.09 0.04
 1 -12 0 0.04 0.05
 -1 -12 0 0.07 0.04
 -1 -12 0 0.08 0.04
 -1 -12 0 0.01 0.04
 1 -12 0 0.12 0.06
 -1 -12 0 0.06 0.05
 -1 12 0 0.11 0.05
 1 12 0 0.03 0.05
 1 12 0 0.03 0.05
 1 12 0 0.02 0.05
 -1 12 0 0.1 0.05
 1 12 0 0.06 0.05
 -1 12 0 0.13 0.05
 -1 12 0 0.03 0.05
 1 12 0 0.04 0.04
 -2 -12 0 0.42 0.08
 -2 -12 0 0.27 0.05
 -2 -12 0 0.34 0.07
 -2 -12 0 0.51 0.07
 2 -12 0 0.31 0.06
 2 -12 0 0.28 0.06
 2 -12 0 0.26 0.06
 2 12 0 0.47 0.08
 2 12 0 0.51 0.07
 2 12 0 0.41 0.07
 -2 12 0 0.34 0.07
 -2 12 0 0.31 0.08
 -2 12 0 0.33 0.06
 -2 12 0 0.32 0.06
 2 12 0 0.46 0.07
 -2 12 0 0.25 0.06
 -3 -12 0 2.26 0.17
 3 -12 0 2.49 0.17
 -3 -12 0 2.64 0.17
 -3 -12 0 2.52 0.18
 -3 -12 0 2.28 0.16
 -3 -12 0 2.32 0.17
 3 -12 0 2.61 0.18
 3 12 0 2.37 0.16
 -3 12 0 2.54 0.18
 -3 12 0 2.58 0.19
 -3 12 0 2.5 0.17
 3 12 0 2.18 0.16
 3 12 0 2.17 0.17
 3 12 0 2.42 0.18
 -4 -12 0 4.46 0.28
 4 -12 0 4.47 0.27
 4 -12 0 4.11 0.29
 -4 -12 0 4.06 0.28
 -4 -12 0 4.21 0.26
 -4 -12 0 4.03 0.28
 -4 -12 0 3.95 0.26
 4 -12 0 4.47 0.28
 4 -12 0 4.41 0.29
 4 12 0 4.26 0.28
 4 12 0 3.87 0.26
 -4 12 0 4.45 0.28
 -4 12 0 4.41 0.29
 -4 12 0 4.24 0.27
 4 12 0 4.28 0.26
 -4 12 0 4.22 0.3
 4 12 0 4.46 0.28
 4 12 0 3.98 0.28
 5 -12 0 0.14 0.07
 5 -12 0 0.02 0.06
 5 -12 0 0.12 0.06
 -5 -12 0 0.11 0.07
 -5 -12 0 0.09 0.04
 -5 -12 0 0.02 0.06
 5 -12 0 0.09 0.07
 -5 -12 0 0.11 0.05
 -5 -12 0 0.1 0.05
 -5 -12 0 0.14 0.04
 -5 12 0 -0.02 0.07
 5 12 0 0.12 0.04
 5 12 0 0.08 0.06
 5 12 0 0.11 0.04
 -5 12 0 0.06 0.05
 5 12 0 0.21 0.06
 -5 12 0 0.11 0.06
 5 12 0 0.14 0.05
 -5 12 0 0.02 0.06
 5 12 0 0.13 0.04
 5 12 0 0.05 0.05
 -6 -12 0 0.1 0.04
 -6 -12 0 0.08 0.05
 -6 -12 0 0.11 0.05
 -6 -12 0 0.13 0.08
 -6 -12 0 0.07 0.04
 6 -12 0 -0.04 0.06
 6 -12 0 0.16 0.06
 6 -12 0 0.12 0.07
 6 -12 0 0.11 0.06
 -6 -12 0 0.09 0.06
 6 -12 0 -0.03 0.07
 -6 12 0 0.14 0.06
 -6 12 0 0.2 0.08
 6 12 0 0.27 0.07
 6 12 0 0.17 0.07
 6 12 0 0.11 0.04
 6 12 0 0.1 0.04
 6 12 0 0.1 0.06
 6 12 0 0.04 0.03
 -6 12 0 0.1 0.06
 -6 12 0 0.1 0.07
 6 12 0 0.08 0.03
 -6 12 0 0.06 0.05
 7 -12 0 4.26 0.29
 7 -12 0 4.42 0.3
 -7 -12 0 4.51 0.3
 7 -12 0 4.58 0.29
 -7 -12 0 4.09 0.29
 7 -12 0 4.49 0.31
 -7 -12 0 4.37 0.26
 -7 -12 0 4.36 0.3
 -7 -12 0 4.33 0.27
 7 -12 0 4.45 0.31
 -7 12 0 4.73 0.29
 7 12 0 4.25 0.26
 -7 12 0 4.61 0.28
 -7 12 0 4.84 0.32
 7 12 0 4.27 0.26
 -7 12 0 4.53 0.3
 -7 12 0 4.5 0.3
 7 12 0 4.27 0.29
 7 12 0 3.93 0.29
 8 -12 0 1.74 0.15
 -8 -12 0 1.49 0.12
 -8 -12 0 1.55 0.17
 -8 -12 0 1.63 0.16
 8 -12 0 1.78 0.16
 8 -12 0 1.78 0.16
 8 -12 0 1.87 0.17
 8 -12 0 1.92 0.17
 8 -12 0 1.67 0.15
 -8 -12 0 1.47 0.13
 -8 12 0 1.62 0.15
 8 12 0 1.61 0.11
 8 12 0 1.47 0.16
 -8 12 0 1.71 0.15
 -8 12 0 1.75 0.17
 8 12 0 1.58 0.11
 -8 12 0 1.3 0.14
 8 12 0 1.75 0.15
 8 12 0 1.66 0.16
 -8 12 0 1.59 0.17
 -8 12 0 1.63 0.14
 9 -12 0 0.69 0.13
 -9 -12 0 0.48 0.1
 9 -12 0 0.5 0.11
 9 -12 0 0.6 0.12
 -9 -12 0 0.55 0.09
 9 -12 0 0.5 0.1
 -9 -12 0 0.36 0.08
 -9 -12 0 0.32 0.07
 9 -12 0 0.61 0.11
 -9 -12 0 0.36 0.11
 9 12 0 0.45 0.05
 9 12 0 0.55 0.06
 9 12 0 0.54 0.1
 -9 12 0 0.41 0.1
 -9 12 0 0.42 0.08
 -9 12 0 0.47 0.1
 9 12 0 0.65 0.13
 10 -12 0 3.99 0.3
 -10 -12 0 4.48 0.27
 -10 -12 0 4.15 0.31
 -10 -12 0 4.51 0.3
 10 -12 0 4.32 0.32
 10 -12 0 4.25 0.29
 -10 -12 0 4.59 0.33
 10 -12 0 4.44 0.33
 10 -12 0 4.21 0.31
 10 12 0 4.76 0.31
 -10 12 0 4.33 0.33
 -10 12 0 4.16 0.31
 10 12 0 4.28 0.32
 -10 12 0 4.07 0.32
 11 -12 0 0.04 0.08
 -11 -12 0 0.28 0.13
 -11 -12 0 0.09 0.07
 11 -12 0 0.12 0.1
 -11 -12 0 0.08 0.06
 11 -12 0 0.1 0.12
 11 -12 0 0.05 0.09
 -11 -12 0 0.21 0.07
 -11 12 0 0.04 0.1
 11 12 0 0.11 0.1
 11 12 0 0.13 0.13
 -11 12 0 0.04 0.12
 -12 -12 0 0.25 0.08
 12 -12 0 0.33 0.12
 12 -12 0 0.28 0.13
 -12 -12 0 0.25 0.08
 12 -12 0 0.33 0.12
 -12 -12 0 0.44 0.14
 12 -12 0 0.14 0.09
 -12 -12 0 0.34 0.06
 12 -12 0 0.12 0.09
 -12 12 0 0.36 0.13
 12 12 0 0.36 0.14
 -12 12 0 0.22 0.12
 12 12 0 0.28 0.11
 13 -12 0 -0.02 0.13
 13 -12 0 -0.15 0.09
 13 -12 0 0.01 0.13
 13 -12 0 0.06 0.09
 -13 12 0 0.14 0.13
 13 12 0 -0.01 0.12
 -13 12 0 0.08 0.12
 14 -12 0 0.01 0.09
 14 -12 0 -0.06 0.1
 -14 -12 0 -0.11 0.15
 -14 12 0 -0.01 0.14
 15 -12 0 -0.1 0.11
 15 -12 0 0.11 0.1
 -15 -12 0 -0.1 0.19
 0 -13 0 0.04 0.05
 0 -13 0 -0.01 0.06
 0 -13 0 0.01 0.05
 0 -13 0 0.02 0.05
 0 -13 0 0.13 0.05
 0 13 0 0.04 0.05
 0 13 0 0.06 0.05
 0 13 0 0.08 0.05
 0 13 0 -0.02 0.05
 0 13 0 0.04 0.05
 1 -13 0 1.23 0.11
 -1 -13 0 1.24 0.11
 1 -13 0 1.49 0.12
 -1 -13 0 1.06 0.11
 1 -13 0 1.19 0.12
 1 -13 0 1.14 0.1
 -1 -13 0 1.22 0.12
 -1 -13 0 1.22 0.11
 -1 -13 0 1.03 0.11
 1 -13 0 1.33 0.11
 -1 13 0 1.38 0.12
 -1 13 0 1.29 0.11
 -1 13 0 1.14 0.11
 -1 13 0 1.36 0.11
 -1 13 0 1.47 0.11
 1 13 0 1.3 0.11
 1 13 0 0.97 0.11
 1 13 0 1.26 0.11
 2 -13 0 1.42 0.13
 2 -13 0 1.47 0.13
 -2 -13 0 1.4 0.12
 2 -13 0 1.37 0.14
 -2 -13 0 1.38 0.12
 2 -13 0 1.44 0.13
 2 -13 0 1.52 0.12
 2 13 0 1.63 0.13
 2 13 0 1.62 0.13
 -2 13 0 1.42 0.12
 2 13 0 1.45 0.12
 -2 13 0 1.37 0.12
 -2 13 0 1.43 0.13
 -2 13 0 1.36 0.14
 2 13 0 1.59 0.12
 3 -13 0 1.26 0.12
 -3 -13 0 1.04 0.1
 -3 -13 0 1.28 0.11
 3 -13 0 0.95 0.12
 -3 -13 0 1.32 0.12
 -3 -13 0 1.11 0.11
 3 -13 0 0.93 0.1
 -3 -13 0 1.16 0.12
 3 -13 0 1.15 0.12
 3 13 0 1.02 0.1
 3 13 0 1.39 0.11
 3 13 0 1.27 0.1
 3 13 0 1.27 0.12
 -3 13 0 1.23 0.12
 -3 13 0 1.1 0.13
 -3 13 0 1 0.12
 -3 13 0 1.13 0.11
 -3 13 0 0.97 0.11
 3 13 0 1.17 0.11
 -4 -13 0 2.09 0.17
 4 -13 0 2.06 0.18
 -4 -13 0 2.3 0.17
 -4 -13 0 2.02 0.16
 4 -13 0 2.39 0.17
 -4 -13 0 2.05 0.17
 -4 -13 0 2.01 0.15
 4 -13 0 2.24 0.18
 4 -13 0 2.4 0.17
 -4 -13 0 2.26 0.16
 4 -13 0 2.37 0.17
 4 13 0 2.09 0.16
 4 13 0 2.21 0.16
 4 13 0 1.95 0.15
 -4 13 0 2.48 0.18
 4 13 0 2.02 0.17
 4 13 0 2.02 0.15
 -4 13 0 2.29 0.17
 -4 13 0 2.45 0.16
 -5 -13 0 0.06 0.07
 -5 -13 0 0.09 0.05
 -5 -13 0 0.14 0.04
 5 -13 0 0.1 0.07
 5 -13 0 0.11 0.07
 5 -13 0 0.2 0.06
 -5 -13 0 0.06 0.06
 -5 -13 0 0.08 0.05
 -5 -13 0 0.09 0.05
 5 -13 0 0.12 0.07
 5 13 0 0.1 0.04
 5 13 0 0.1 0.04
 5 13 0 0.07 0.06
 5 13 0 0.07 0.06
 5 13 0 0.15 0.05
 -5 13 0 0.13 0.08
 5 13 0 0.11 0.05
 5 13 0 0 0.07
 -5 13 0 0.01 0.06
 -5 13 0 0.18 0.06
 -5 13 0 0.18 0.06
 6 -13 0 4.04 0.28
 6 -13 0 3.63 0.27
 -6 -13 0 4.01 0.24
 -6 -13 0 3.83 0.27
 -6 -13 0 3.8 0.27
 6 -13 0 3.95 0.28
 6 -13 0 3.83 0.26
 -6 -13 0 3.84 0.25
 -6 -13 0 4.22 0.27
 6 -13 0 3.72 0.27
 -6 -13 0 4.03 0.28
 -6 13 0 4.08 0.28
 6 13 0 3.95 0.26
 -6 13 0 3.89 0.26
 6 13 0 4.19 0.24
 -6 13 0 4.12 0.27
 6 13 0 3.87 0.27
 6 13 0 4.01 0.24
 -6 13 0 3.82 0.29
 6 13 0 3.95 0.27
 6 13 0 3.81 0.27
 7 -13 0 0.57 0.11
 7 -13 0 0.39 0.09
 -7 -13 0 0.5 0.07
 -7 -13 0 0.63 0.09
 7 -13 0 0.76 0.12
 7 -13 0 0.47 0.09
 -7 -13 0 0.5 0.1
 -7 -13 0 0.65 0.11
 7 -13 0 0.59 0.13
 -7 -13 0 0.76 0.12
 -7 -13 0 0.64 0.09
 7 13 0 0.51 0.08
 7 13 0 0.49 0.06
 7 13 0 0.54 0.1
 -7 13 0 0.54 0.09
 -7 13 0 0.56 0.13
 7 13 0 0.5 0.09
 -7 13 0 0.63 0.1
 -7 13 0 0.56 0.12
 -7 13 0 0.4 0.07
 7 13 0 0.65 0.07
 -8 -13 0 0.15 0.09
 8 -13 0 0.3 0.08
 -8 -13 0 0.14 0.06
 -8 -13 0 0.15 0.05
 -8 -13 0 0.15 0.08
 8 -13 0 0.2 0.1
 8 -13 0 0.26 0.08
 8 -13 0 0.17 0.07
 8 -13 0 0.27 0.08
 -8 -13 0 0.16 0.06
 -8 13 0 0.31 0.1
 8 13 0 0.13 0.04
 8 13 0 0.24 0.09
 -8 13 0 0.21 0.07
 8 13 0 0.29 0.06
 -8 13 0 0.25 0.07
 -8 13 0 0.19 0.09
 8 13 0 0.04 0.07
 -8 13 0 0.22 0.06
 8 13 0 0.19 0.08
 -9 -13 0 0.32 0.09
 -9 -13 0 0.34 0.07
 -9 -13 0 0.31 0.07
 9 -13 0 0.41 0.08
 -9 -13 0 0.66 0.13
 9 -13 0 0.51 0.11
 9 -13 0 0.33 0.1
 9 -13 0 0.6 0.14
 9 -13 0 0.36 0.09
 -9 -13 0 0.36 0.06
 9 13 0 0.32 0.09
 9 13 0 0.3 0.06
 9 13 0 0.49 0.11
 9 13 0 0.4 0.06
 -9 13 0 0.39 0.11
 -9 13 0 0.39 0.1
 -9 13 0 0.65 0.12
 -10 -13 0 0.01 0.11
 10 -13 0 0.12 0.11
 10 -13 0 0.18 0.1
 -10 -13 0 0.06 0.1
 -10 -13 0 0.06 0.06
 -10 -13 0 0.13 0.07
 10 -13 0 0.13 0.08
 10 -13 0 0.08 0.08
 10 -13 0 0.12 0.09
 10 13 0 0.18 0.11
 -10 13 0 0.01 0.1
 -10 13 0 0.24 0.08
 10 13 0 0.09 0.1
 -10 13 0 0.15 0.1
 11 -13 0 0.11 0.12
 -11 -13 0 -0.06 0.14
 11 -13 0 0.08 0.11
 11 -13 0 -0.05 0.08
 -11 -13 0 0.03 0.07
 11 -13 0 0.03 0.11
 -11 -13 0 0 0.06
 11 13 0 0.23 0.14
 -11 13 0 0 0.11
 -11 13 0 0.21 0.12
 11 13 0 0.05 0.11
 12 -13 0 0.09 0.12
 12 -13 0 -0.01 0.09
 12 -13 0 0.08 0.13
 12 -13 0 -0.01 0.13
 12 -13 0 0.12 0.09
 -12 -13 0 0.05 0.08
 -12 -13 0 -0.01 0.14
 -12 -13 0 0.08 0.06
 -12 13 0 0.04 0.12
 12 13 0 -0.03 0.11
 12 13 0 0.2 0.15
 13 -13 0 -0.11 0.09
 13 -13 0 -0.08 0.1
 -13 -13 0 -0.02 0.14
 -13 13 0 0.18 0.14
 -13 13 0 -0.05 0.13
 13 13 0 0 0.12
 14 -13 0 0.21 0.1
 -14 -13 0 0.06 0.18
 -14 13 0 0.35 0.17
 -14 13 0 0.04 0.14
 -15 -13 0 0.03 0.17
 15 -13 0 0.16 0.11
 -15 13 0 -0.03 0.18
 0 -14 0 0.75 0.1
 0 -14 0 0.88 0.1
 0 -14 0 0.79 0.11
 0 -14 0 0.8 0.1
 0 -14 0 0.73 0.09
 0 14 0 0.76 0.11
 0 14 0 0.93 0.1
 0 14 0 0.91 0.11
 0 14 0 0.83 0.1
 0 14 0 0.8 0.1
 -1 -14 0 5.21 0.35
 1 -14 0 5.62 0.33
 1 -14 0 5.51 0.36
 -1 -14 0 5.73 0.36
 -1 -14 0 4.94 0.35
 1 -14 0 5.25 0.35
 1 -14 0 4.97 0.33
 -1 -14 0 4.92 0.33
 -1 14 0 5.52 0.36
 1 14 0 5.86 0.33
 -1 14 0 5.55 0.33
 -1 14 0 5.65 0.35
 1 14 0 4.88 0.33
 -1 14 0 5.76 0.36
 1 14 0 5.25 0.36
 1 14 0 5.37 0.35
 -2 -14 0 0.53 0.09
 2 -14 0 0.52 0.09
 2 -14 0 0.44 0.1
 2 -14 0 0.48 0.09
 -2 -14 0 0.39 0.08
 -2 -14 0 0.52 0.1
 2 -14 0 0.61 0.11
 2 -14 0 0.44 0.1
 2 14 0 0.7 0.1
 2 14 0 0.63 0.09
 -2 14 0 0.43 0.08
 -2 14 0 0.48 0.09
 2 14 0 0.49 0.09
 -2 14 0 0.45 0.1
 2 14 0 0.52 0.08
 -2 14 0 0.41 0.09
 2 14 0 0.62 0.09
 -2 14 0 0.53 0.09
 3 -14 0 0.06 0.06
 3 -14 0 0.14 0.07
 -3 -14 0 0.16 0.07
 3 -14 0 0.13 0.06
 3 -14 0 0.17 0.07
 -3 -14 0 0.18 0.06
 -3 -14 0 0.16 0.05
 3 -14 0 -0.01 0.07
 -3 -14 0 0.13 0.06
 3 14 0 0.04 0.05
 -3 14 0 0.12 0.06
 -3 14 0 0.1 0.06
 3 14 0 0.11 0.05
 3 14 0 0.16 0.05
 -3 14 0 0.08 0.07
 3 14 0 0.06 0.05
 -3 14 0 0.09 0.06
 3 14 0 0.11 0.07
 4 -14 0 0.66 0.11
 4 -14 0 0.9 0.1
 -4 -14 0 0.74 0.11
 -4 -14 0 0.85 0.09
 -4 -14 0 0.87 0.11
 -4 -14 0 0.82 0.12
 4 -14 0 0.94 0.12
 4 -14 0 1 0.12
 -4 -14 0 0.87 0.1
 -4 14 0 0.91 0.12
 -4 14 0 0.98 0.11
 4 14 0 0.86 0.13
 -4 14 0 0.95 0.1
 4 14 0 0.98 0.1
 4 14 0 0.96 0.09
 -4 14 0 0.93 0.11
 4 14 0 1.01 0.1
 4 14 0 1.05 0.1
 -5 -14 0 1.34 0.12
 5 -14 0 1.34 0.14
 -5 -14 0 1.33 0.12
 -5 -14 0 1.19 0.1
 -5 -14 0 1.4 0.12
 5 -14 0 1.02 0.13
 -5 -14 0 1.19 0.13
 -5 -14 0 1.38 0.13
 5 -14 0 1.14 0.14
 5 -14 0 1.07 0.13
 5 14 0 1.19 0.11
 5 14 0 1.14 0.12
 -5 14 0 1.1 0.13
 -5 14 0 1.04 0.12
 5 14 0 1.24 0.11
 -5 14 0 1.16 0.13
 5 14 0 1.47 0.11
 -5 14 0 1.09 0.14
 5 14 0 1.49 0.12
 5 14 0 1.4 0.14
 -6 -14 0 0.09 0.06
 -6 -14 0 0.15 0.06
 6 -14 0 0.02 0.08
 -6 -14 0 0.1 0.07
 -6 -14 0 0.14 0.04
 6 -14 0 0.18 0.07
 6 -14 0 0.07 0.07
 -6 -14 0 0.35 0.08
 6 -14 0 0.06 0.08
 6 -14 0 -0.04 0.07
 -6 -14 0 0.28 0.1
 6 14 0 0.3 0.07
 6 14 0 0.19 0.06
 6 14 0 0.3 0.07
 -6 14 0 0.09 0.06
 6 14 0 0.13 0.07
 -6 14 0 0.07 0.08
 6 14 0 0.17 0.07
 -6 14 0 0.15 0.06
 6 14 0 0.2 0.05
 6 14 0 0.16 0.05
 -6 14 0 0.2 0.07
 -7 -14 0 0.32 0.06
 7 -14 0 0.52 0.11
 7 -14 0 0.31 0.1
 -7 -14 0 0.37 0.06
 7 -14 0 0.26 0.08
 -7 -14 0 0.3 0.08
 7 -14 0 0.27 0.08
 -7 -14 0 0.46 0.09
 -7 -14 0 0.3 0.09
 -7 -14 0 0.36 0.07
 7 -14 0 0.35 0.08
 7 14 0 0.25 0.06
 7 14 0 0.28 0.08
 -7 14 0 0.13 0.06
 7 14 0 0.29 0.05
 7 14 0 0.28 0.05
 7 14 0 0.56 0.11
 -7 14 0 0.42 0.09
 7 14 0 0.29 0.08
 -7 14 0 0.57 0.11
 -7 14 0 0.24 0.06
 7 14 0 0.28 0.06
 -7 14 0 0.35 0.09
 -8 -14 0 1.09 0.14
 -8 -14 0 1.21 0.12
 8 -14 0 1.06 0.14
 8 -14 0 1.04 0.16
 -8 -14 0 1.16 0.16
 -8 -14 0 0.97 0.1
 8 -14 0 1.36 0.14
 8 -14 0 1.26 0.16
 8 -14 0 1.14 0.17
 -8 -14 0 1.14 0.13
 8 14 0 1.11 0.14
 -8 14 0 1.17 0.14
 -8 14 0 1.11 0.16
 -8 14 0 1.35 0.15
 8 14 0 1.22 0.09
 8 14 0 0.91 0.14
 8 14 0 1.25 0.1
 8 14 0 0.92 0.14
 9 -14 0 2.54 0.22
 9 -14 0 2.47 0.21
 9 -14 0 2.18 0.23
 -9 -14 0 2.05 0.19
 -9 -14 0 2.04 0.17
 -9 -14 0 2.45 0.22
 9 -14 0 2.54 0.21
 -9 -14 0 2.32 0.21
 9 -14 0 2.48 0.2
 9 14 0 2.16 0.21
 -9 14 0 2.35 0.23
 9 14 0 2.26 0.21
 -9 14 0 2.5 0.2
 -9 14 0 2.57 0.2
 9 14 0 2.34 0.15
 9 14 0 2.16 0.15
 10 -14 0 3.91 0.28
 -10 -14 0 3.51 0.26
 10 -14 0 3.74 0.3
 -10 -14 0 3.3 0.23
 10 -14 0 3.6 0.28
 -10 -14 0 3.53 0.29
 10 -14 0 3.92 0.26
 10 -14 0 3.4 0.28
 -10 -14 0 3.09 0.29
 -10 14 0 3.79 0.27
 10 14 0 3.48 0.28
 10 14 0 3.58 0.21
 -10 14 0 3.48 0.29
 10 14 0 3.65 0.28
 -10 14 0 3.6 0.3
 11 -14 0 0.51 0.13
 11 -14 0 0.59 0.11
 11 -14 0 0.94 0.2
 -11 -14 0 0.55 0.13
 11 -14 0 0.56 0.14
 11 -14 0 0.51 0.11
 -11 -14 0 0.71 0.11
 -11 -14 0 0.71 0.15
 11 14 0 0.56 0.12
 -11 14 0 0.55 0.14
 -11 14 0 0.65 0.12
 -11 14 0 0.73 0.15
 11 14 0 0.53 0.15
 12 -14 0 0 0.14
 -12 -14 0 0.09 0.16
 12 -14 0 -0.07 0.09
 -12 -14 0 -0.02 0.08
 12 -14 0 -0.05 0.09
 12 -14 0 -0.01 0.13
 -12 -14 0 0.05 0.07
 12 -14 0 -0.05 0.13
 -12 14 0 0.02 0.12
 12 14 0 0.11 0.12
 -12 14 0 -0.02 0.14
 -12 14 0 0.08 0.12
 12 14 0 0.12 0.16
 13 -14 0 0.12 0.1
 -13 -14 0 -0.12 0.16
 -13 14 0 0 0.13
 -13 14 0 -0.05 0.15
 14 -14 0 0.24 0.1
 -14 -14 0 0.27 0.19
 14 -14 0 0.11 0.12
 -14 14 0 0.28 0.16
 -14 14 0 0.58 0.18
 0 -15 0 0.01 0.07
 0 -15 0 0.04 0.05
 0 -15 0 -0.02 0.06
 0 -15 0 0.09 0.05
 0 -15 0 0.03 0.06
 0 15 0 0.11 0.06
 0 15 0 0.04 0.06
 0 15 0 -0.01 0.05
 0 15 0 -0.03 0.06
 0 15 0 -0.02 0.06
 -1 -15 0 0.56 0.08
 1 -15 0 0.44 0.09
 -1 -15 0 0.5 0.1
 1 -15 0 0.51 0.11
 -1 -15 0 0.6 0.09
 1 -15 0 0.43 0.08
 -1 -15 0 0.57 0.09
 -1 -15 0 0.48 0.11
 1 -15 0 0.59 0.12
 1 -15 0 0.5 0.1
 1 15 0 0.43 0.1
 -1 15 0 0.4 0.09
 -1 15 0 0.43 0.08
 -1 15 0 0.4 0.1
 1 15 0 0.51 0.1
 1 15 0 0.47 0.09
 -1 15 0 0.49 0.11
 1 15 0 0.52 0.11
 1 15 0 0.69 0.09
 2 -15 0 2.3 0.17
 -2 -15 0 2.21 0.17
 -2 -15 0 2.23 0.17
 2 -15 0 2.15 0.17
 -2 -15 0 1.93 0.17
 2 -15 0 2.17 0.18
 2 -15 0 2.33 0.18
 2 -15 0 2.07 0.17
 -2 15 0 2.02 0.17
 2 15 0 2.11 0.16
 -2 15 0 2.3 0.18
 -2 15 0 2.18 0.17
 2 15 0 2.62 0.18
 -2 15 0 2.64 0.17
 -2 15 0 2.04 0.17
 2 15 0 2.3 0.17
 -3 -15 0 11.26 0.73
 -3 -15 0 11.67 0.72
 3 -15 0 11.1 0.68
 3 -15 0 12 0.73
 3 -15 0 10.59 0.7
 -3 -15 0 11.81 0.7
 3 -15 0 11.22 0.67
 3 15 0 11.98 0.71
 -3 15 0 11.87 0.73
 -3 15 0 10.51 0.67
 -3 15 0 11.53 0.71
 3 15 0 11.71 0.67
 -3 15 0 10.6 0.67
 3 15 0 11.19 0.67
 -4 -15 0 4.66 0.33
 4 -15 0 5.27 0.32
 4 -15 0 5.47 0.32
 -4 15 0 4.93 0.35
 4 15 0 5.15 0.34
 4 15 0 4.51 0.3
 -4 15 0 5.47 0.33
 4 15 0 4.75 0.31
 -4 15 0 5.15 0.34
 4 15 0 4.72 0.33
 5 -15 0 5.73 0.38
 5 -15 0 5.58 0.36
 -5 -15 0 5.74 0.35
 -5 -15 0 5.56 0.38
 -5 -15 0 5.7 0.36
 5 -15 0 5.57 0.39
 -5 -15 0 5.5 0.38
 -5 -15 0 5.65 0.38
 -5 -15 0 6.34 0.38
 -5 15 0 5.96 0.39
 -5 15 0 5.59 0.4
 5 15 0 6.02 0.38
 -5 15 0 6.3 0.38
 -5 15 0 6.14 0.36
 5 15 0 5.39 0.35
 5 15 0 6.04 0.35
 -6 -15 0 1.23 0.14
 6 -15 0 1.02 0.14
 -6 -15 0 1.4 0.13
 -6 -15 0 1.18 0.12
 6 -15 0 0.95 0.14
 -6 -15 0 1.14 0.1
 6 -15 0 1.17 0.13
 -6 -15 0 1.13 0.12
 6 -15 0 1 0.14
 -6 -15 0 1.4 0.14
 6 -15 0 0.95 0.15
 6 15 0 1.25 0.11
 6 15 0 1.24 0.12
 -6 15 0 1.43 0.14
 6 15 0 1.41 0.14
 6 15 0 1.23 0.11
 -6 15 0 1.25 0.12
 6 15 0 1.22 0.11
 -6 15 0 1.13 0.15
 -6 15 0 1.3 0.14
 6 15 0 1.18 0.1
 7 -15 0 2.27 0.2
 7 -15 0 2.32 0.19
 -7 -15 0 2.45 0.2
 -7 -15 0 2.05 0.15
 -7 -15 0 2.3 0.2
 7 -15 0 2.08 0.18
 -7 -15 0 2.38 0.17
 -7 -15 0 2.23 0.17
 7 -15 0 2.12 0.19
 7 -15 0 2.23 0.2
 -7 -15 0 2.08 0.18
 7 15 0 2.12 0.16
 -7 15 0 2.04 0.2
 7 15 0 2.16 0.18
 -7 15 0 2.44 0.18
 -7 15 0 2.14 0.17
 7 15 0 2.11 0.15
 7 15 0 1.96 0.16
 7 15 0 2.18 0.15
 7 15 0 2.2 0.19
 7 15 0 2.27 0.19
 -7 15 0 2.08 0.18
 8 -15 0 0.18 0.09
 8 -15 0 0.24 0.08
 -8 -15 0 0.47 0.11
 -8 -15 0 0.21 0.07
 8 -15 0 0.17 0.1
 -8 -15 0 0.27 0.06
 -8 -15 0 0.23 0.09
 -8 -15 0 0.34 0.11
 8 -15 0 0.23 0.09
 8 -15 0 0.12 0.1
 8 15 0 0.34 0.07
 8 15 0 0.18 0.09
 -8 15 0 0.13 0.1
 -8 15 0 0.19 0.09
 8 15 0 0.19 0.1
 8 15 0 0.3 0.09
 -8 15 0 0.14 0.08
 8 15 0 0.38 0.08
 9 -15 0 0.19 0.1
 9 -15 0 0.19 0.12
 -9 -15 0 0.14 0.1
 -9 -15 0 0.09 0.07
 -9 -15 0 0.14 0.07
 9 -15 0 0.2 0.1
 -9 -15 0 0.11 0.07
 -9 -15 0 0.21 0.1
 9 -15 0 0.23 0.09
 9 -15 0 0.09 0.08
 -9 15 0 0.2 0.08
 -9 15 0 0.16 0.1
 -9 15 0 0.1 0.1
 9 15 0 0 0.1
 9 15 0 0.11 0.05
 9 15 0 0.13 0.1
 9 15 0 0.15 0.04
 10 -15 0 0.81 0.17
 10 -15 0 0.53 0.11
 -10 -15 0 0.49 0.11
 -10 -15 0 0.5 0.13
 -10 -15 0 0.41 0.12
 -10 -15 0 0.46 0.09
 10 -15 0 0.57 0.13
 10 -15 0 0.58 0.13
 10 -15 0 0.68 0.13
 10 15 0 0.45 0.13
 10 15 0 0.82 0.17
 -10 15 0 0.57 0.14
 -10 15 0 0.46 0.12
 -10 15 0 0.5 0.1
 10 15 0 0.56 0.07
 10 15 0 0.52 0.06
 11 -15 0 0.51 0.14
 11 -15 0 0.48 0.11
 11 -15 0 0.56 0.1
 -11 -15 0 0.39 0.13
 -11 -15 0 0.47 0.08
 -11 -15 0 0.55 0.15
 11 -15 0 0.32 0.13
 11 -15 0 0.6 0.14
 -11 15 0 0.42 0.13
 -11 15 0 0.48 0.11
 -11 15 0 0.5 0.14
 11 15 0 0.4 0.15
 11 15 0 0.46 0.12
 -12 -15 0 0.17 0.14
 12 -15 0 0.06 0.14
 -12 -15 0 0.14 0.07
 12 -15 0 0.01 0.15
 12 -15 0 0.21 0.1
 12 -15 0 0.21 0.14
 12 -15 0 0.13 0.1
 -12 15 0 0.05 0.15
 -12 15 0 0.08 0.13
 -12 15 0 0.2 0.12
 12 15 0 0.03 0.12
 -13 -15 0 0.22 0.18
 13 -15 0 0.14 0.11
 13 -15 0 0.22 0.1
 -13 15 0 0.41 0.14
 -13 15 0 0.29 0.15
 13 15 0 0.31 0.13
 14 -15 0 0.12 0.1
 -14 -15 0 0.05 0.2
 -14 15 0 0.21 0.14
 -14 15 0 0.11 0.16
 0 -16 0 26.94 1.75
 0 -16 0 30.07 1.67
 0 -16 0 30.02 1.81
 0 -16 0 27.7 1.67
 0 -16 0 27.29 1.81
 0 16 0 30.63 1.67
 0 16 0 27.97 1.81
 0 16 0 29.96 1.81
 -1 -16 0 1.71 0.17
 -1 -16 0 1.75 0.15
 -1 -16 0 1.83 0.16
 1 -16 0 1.73 0.16
 -1 -16 0 1.83 0.14
 1 -16 0 1.87 0.17
 -1 -16 0 1.9 0.15
 1 -16 0 1.87 0.15
 1 -16 0 1.61 0.15
 1 16 0 1.62 0.16
 -1 16 0 2.13 0.16
 1 16 0 1.79 0.15
 -1 16 0 2.14 0.16
 1 16 0 1.95 0.16
 -1 16 0 1.67 0.17
 1 16 0 1.92 0.16
 -1 16 0 1.73 0.16
 -1 16 0 2.15 0.16
 -2 -16 0 17.08 1.03
 2 -16 0 17.37 1.08
 2 -16 0 16.81 1.12
 -2 -16 0 18.42 1.03
 2 -16 0 18.97 1.12
 2 -16 0 17.16 1.03
 -2 -16 0 17.44 1.11
 2 -16 0 16.91 1.03
 2 16 0 18.72 1.12
 -2 16 0 17.24 1.12
 2 16 0 17.49 1.03
 -2 16 0 17.68 1.12
 2 16 0 18.39 1.03
 3 -16 0 1.38 0.15
 -3 -16 0 1.18 0.12
 3 -16 0 1.37 0.12
 -3 -16 0 1.43 0.12
 3 -16 0 1.35 0.13
 3 -16 0 1.25 0.14
 3 -16 0 1.31 0.14
 -3 -16 0 1.22 0.12
 -3 -16 0 1.16 0.12
 3 16 0 1.14 0.13
 3 16 0 1.19 0.13
 3 16 0 1.14 0.12
 -3 16 0 1.22 0.13
 -3 16 0 1.14 0.13
 3 16 0 1.09 0.11
 -3 16 0 1.28 0.13
 3 16 0 1.28 0.13
 -3 16 0 1.24 0.14
 -3 16 0 1.45 0.13
 -4 -16 0 0.73 0.1
 -4 -16 0 0.33 0.08
 -4 -16 0 0.51 0.09
 4 -16 0 0.48 0.09
 4 -16 0 0.33 0.09
 4 -16 0 0.59 0.1
 -4 -16 0 0.45 0.11
 4 -16 0 0.56 0.12
 4 -16 0 0.41 0.08
 4 16 0 0.4 0.07
 4 16 0 0.45 0.1
 4 16 0 0.46 0.1
 -4 16 0 0.5 0.09
 4 16 0 0.36 0.08
 4 16 0 0.5 0.09
 -4 16 0 0.55 0.12
 -4 16 0 0.34 0.08
 -4 16 0 0.5 0.09
 -4 16 0 0.5 0.08
 5 -16 0 2.02 0.16
 5 -16 0 1.87 0.17
 5 -16 0 2.03 0.18
 -5 -16 0 2.12 0.17
 -5 -16 0 1.86 0.16
 5 -16 0 1.93 0.17
 -5 -16 0 1.79 0.16
 -5 -16 0 1.67 0.17
 -5 -16 0 1.85 0.16
 5 16 0 1.9 0.14
 -5 16 0 2.23 0.18
 -5 16 0 2.03 0.16
 5 16 0 1.67 0.17
 5 16 0 1.93 0.16
 -5 16 0 2.1 0.19
 -5 16 0 2.28 0.17
 -5 16 0 2.22 0.17
 5 16 0 1.72 0.15
 -6 -16 0 5.5 0.36
 -6 -16 0 5.33 0.36
 -6 -16 0 5.73 0.34
 6 -16 0 5.53 0.36
 6 -16 0 5.53 0.37
 6 -16 0 5.33 0.37
 6 -16 0 5.28 0.34
 -6 -16 0 4.84 0.35
 -6 -16 0 5.11 0.36
 -6 16 0 5.66 0.36
 -6 16 0 5.21 0.37
 6 16 0 5.4 0.36
 6 16 0 5.05 0.33
 -6 16 0 4.93 0.34
 6 16 0 5.07 0.35
 -6 16 0 5.42 0.38
 6 16 0 5.45 0.33
 6 16 0 5.57 0.35
 6 16 0 5.67 0.35
 -7 -16 0 3.17 0.22
 7 -16 0 2.74 0.21
 7 -16 0 2.69 0.24
 7 -16 0 2.68 0.22
 7 -16 0 2.55 0.23
 -7 -16 0 2.55 0.18
 -7 -16 0 2.68 0.21
 7 -16 0 2.6 0.22
 -7 -16 0 2.79 0.21
 -7 -16 0 2.71 0.2
 -7 -16 0 2.61 0.21
 7 16 0 2.72 0.19
 -7 16 0 2.81 0.23
 -7 16 0 2.63 0.22
 7 16 0 2.77 0.18
 7 16 0 2.74 0.19
 -7 16 0 2.46 0.2
 7 16 0 2.48 0.21
 7 16 0 2.66 0.23
 7 16 0 2.92 0.22
 7 16 0 2.67 0.19
 -7 16 0 3.1 0.22
 -8 -16 0 0.54 0.12
 -8 -16 0 0.45 0.08
 8 -16 0 0.35 0.1
 8 -16 0 0.55 0.13
 -8 -16 0 0.47 0.08
 8 -16 0 0.41 0.12
 -8 -16 0 0.5 0.11
 8 -16 0 0.37 0.1
 -8 -16 0 0.34 0.1
 8 -16 0 0.4 0.09
 -8 16 0 0.52 0.12
 8 16 0 0.46 0.06
 8 16 0 0.44 0.11
 8 16 0 0.38 0.05
 8 16 0 0.56 0.08
 -8 16 0 0.3 0.1
 -8 16 0 0.69 0.12
 8 16 0 0.59 0.14
 -8 16 0 0.55 0.13
 9 -16 0 0.56 0.14
 -9 -16 0 0.52 0.11
 9 -16 0 0.57 0.13
 9 -16 0 0.55 0.12
 -9 -16 0 0.64 0.13
 -9 -16 0 0.47 0.11
 9 -16 0 0.7 0.14
 9 -16 0 0.5 0.12
 -9 -16 0 0.58 0.13
 -9 -16 0 0.36 0.09
 -9 16 0 0.53 0.12
 -9 16 0 0.49 0.1
 9 16 0 0.48 0.09
 -9 16 0 0.46 0.13
 -9 16 0 0.75 0.13
 9 16 0 0.49 0.08
 9 16 0 0.61 0.15
 9 16 0 0.62 0.15
 10 -16 0 0.76 0.16
 10 -16 0 0.54 0.13
 -10 -16 0 0.51 0.12
 -10 -16 0 0.42 0.09
 -10 -16 0 0.42 0.09
 -10 -16 0 0.78 0.16
 10 -16 0 1.02 0.16
 -10 -16 0 0.68 0.15
 10 -16 0 0.45 0.13
 10 -16 0 0.85 0.19
 -10 16 0 0.72 0.14
 10 16 0 0.7 0.07
 10 16 0 0.47 0.14
 -10 16 0 0.55 0.14
 -10 16 0 0.76 0.15
 10 16 0 0.51 0.12
 -10 16 0 0.94 0.16
 10 16 0 0.65 0.08
 11 -16 0 0.27 0.14
 11 -16 0 0.07 0.13
 11 -16 0 0.1 0.1
 -11 -16 0 0 0.12
 11 -16 0 -0.19 0.14
 -11 -16 0 0.06 0.08
 11 -16 0 0.15 0.1
 -11 16 0 0.15 0.12
 -11 16 0 0.04 0.1
 11 16 0 0.04 0.12
 -11 16 0 0.02 0.14
 11 16 0 0.11 0.15
 -12 -16 0 0.05 0.08
 -12 -16 0 -0.07 0.14
 12 -16 0 0 0.15
 12 -16 0 -0.08 0.09
 12 -16 0 0.09 0.11
 -12 16 0 0.08 0.12
 12 16 0 0.1 0.13
 -12 16 0 0.03 0.14
 13 -16 0 -0.04 0.11
 -13 -16 0 0.14 0.16
 13 -16 0 0.2 0.1
 -13 16 0 0.15 0.13
 -13 16 0 0.14 0.15
 14 -16 0 0.11 0.11
 14 -16 0 -0.05 0.13
 -14 -16 0 0.08 0.17
 14 16 0 -0.07 0.14
 -14 16 0 0.07 0.16
 -14 16 0 0.06 0.14
 0 -17 0 0.53 0.1
 0 -17 0 0.59 0.13
 0 -17 0 0.48 0.11
 0 -17 0 0.46 0.1
 0 17 0 0.66 0.12
 0 17 0 0.76 0.12
 0 17 0 0.52 0.11
 -1 -17 0 0.28 0.07
 -1 -17 0 0.25 0.07
 1 -17 0 0.28 0.08
 1 -17 0 0.23 0.08
 -1 -17 0 0.21 0.06
 1 -17 0 0.17 0.06
 -1 -17 0 0.52 0.11
 1 -17 0 0.18 0.06
 1 -17 0 0.16 0.08
 -1 -17 0 0.57 0.12
 -1 17 0 0.27 0.08
 -1 17 0 0.32 0.08
 1 17 0 0.38 0.08
 -1 17 0 0.35 0.08
 -1 17 0 0.29 0.08
 -1 17 0 0.4 0.08
 1 17 0 0.53 0.1
 1 17 0 0.52 0.11
 1 17 0 0.36 0.08
 1 17 0 0.52 0.11
 2 -17 0 2.15 0.21
 -2 -17 0 2.78 0.2
 -2 -17 0 2.3 0.18
 2 -17 0 2.53 0.19
 2 -17 0 2.54 0.2
 2 -17 0 2.12 0.19
 -2 -17 0 2.6 0.19
 -2 -17 0 2.54 0.17
 2 -17 0 2.15 0.19
 -2 17 0 2.43 0.19
 -2 17 0 2.38 0.19
 2 17 0 2.74 0.18
 2 17 0 2.45 0.2
 2 17 0 2.69 0.19
 2 17 0 2.67 0.19
 -2 17 0 2.58 0.2
 2 17 0 2.09 0.19
 -2 17 0 2.25 0.2
 -3 -17 0 0.31 0.08
 -3 -17 0 0.51 0.09
 -3 -17 0 0.26 0.06
 3 -17 0 0.35 0.07
 3 -17 0 0.37 0.08
 3 -17 0 0.47 0.1
 3 -17 0 0.38 0.09
 -3 -17 0 0.49 0.08
 -3 -17 0 0.2 0.06
 3 -17 0 0.42 0.09
 -3 -17 0 0.28 0.07
 3 17 0 0.54 0.1
 -3 17 0 0.38 0.08
 -3 17 0 0.52 0.12
 -3 17 0 0.62 0.09
 3 17 0 0.31 0.07
 3 17 0 0.29 0.07
 3 17 0 0.43 0.1
 -3 17 0 0.4 0.08
 3 17 0 0.3 0.07
 4 -17 0 0.77 0.13
 -4 -17 0 0.82 0.12
 -4 -17 0 0.93 0.1
 4 -17 0 0.96 0.1
 -4 -17 0 0.93 0.11
 4 -17 0 0.49 0.13
 -4 -17 0 0.91 0.12
 4 17 0 0.85 0.11
 4 17 0 0.7 0.12
 4 17 0 0.82 0.1
 4 17 0 0.88 0.12
 4 17 0 0.86 0.11
 -4 17 0 0.51 0.12
 -4 17 0 0.69 0.12
 -4 17 0 0.5 0.13
 -4 17 0 0.76 0.1
 -4 17 0 0.66 0.11
 -5 -17 0 1.11 0.13
 5 -17 0 0.84 0.15
 -5 -17 0 1.23 0.13
 -5 -17 0 0.92 0.13
 -5 -17 0 1.01 0.12
 -5 -17 0 0.98 0.13
 5 -17 0 0.79 0.14
 5 -17 0 0.86 0.14
 5 -17 0 0.99 0.15
 5 -17 0 1.09 0.13
 5 17 0 1.08 0.12
 5 17 0 1.12 0.12
 -5 17 0 1.08 0.12
 5 17 0 1.07 0.14
 5 17 0 1.01 0.11
 -5 17 0 0.97 0.13
 -5 17 0 1.31 0.15
 -5 17 0 1.03 0.13
 5 17 0 1.04 0.12
 -5 17 0 0.96 0.14
 6 -17 0 0.02 0.1
 6 -17 0 0.13 0.08
 -6 -17 0 0.04 0.09
 6 -17 0 0.13 0.07
 -6 -17 0 0.1 0.07
 -6 -17 0 0.08 0.06
 6 -17 0 0.17 0.09
 -6 -17 0 -0.01 0.08
 -6 -17 0 0.08 0.07
 6 17 0 0.15 0.06
 -6 17 0 0.08 0.07
 -6 17 0 0.14 0.06
 6 17 0 -0.03 0.08
 6 17 0 0.03 0.06
 -6 17 0 0.08 0.09
 6 17 0 -0.03 0.05
 -6 17 0 0.13 0.07
 6 17 0 0.15 0.06
 -6 17 0 -0.04 0.08
 6 17 0 0.03 0.08
 7 -17 0 0.99 0.14
 -7 -17 0 0.92 0.13
 -7 -17 0 1.06 0.13
 7 -17 0 0.95 0.14
 -7 -17 0 0.89 0.15
 -7 -17 0 0.92 0.14
 -7 -17 0 0.97 0.14
 7 -17 0 1.13 0.15
 7 -17 0 0.9 0.17
 7 17 0 0.69 0.11
 -7 17 0 0.88 0.13
 -7 17 0 1.36 0.15
 7 17 0 0.9 0.12
 7 17 0 1.16 0.13
 7 17 0 0.78 0.13
 7 17 0 1.05 0.1
 -7 17 0 0.98 0.16
 7 17 0 0.92 0.15
 7 17 0 1.07 0.1
 -8 -17 0 -0.01 0.08
 8 -17 0 0 0.08
 -8 -17 0 0.07 0.1
 8 -17 0 -0.01 0.11
 -8 -17 0 0.06 0.08
 8 -17 0 0.18 0.1
 8 -17 0 0.05 0.11
 -8 -17 0 -0.04 0.09
 8 -17 0 0.08 0.09
 -8 -17 0 -0.04 0.07
 -8 17 0 -0.06 0.09
 8 17 0 0.03 0.1
 -8 17 0 0.05 0.09
 8 17 0 0.05 0.1
 8 17 0 -0.01 0.04
 8 17 0 -0.02 0.04
 -8 17 0 -0.03 0.09
 8 17 0 0.07 0.05
 -8 17 0 -0.04 0.11
 9 -17 0 0.04 0.12
 -9 -17 0 0.01 0.08
 -9 -17 0 0.13 0.13
 9 -17 0 0.01 0.11
 9 -17 0 0.18 0.12
 -9 -17 0 -0.02 0.1
 9 -17 0 0 0.09
 -9 -17 0 0.04 0.08
 -9 -17 0 -0.1 0.08
 9 -17 0 0.08 0.09
 9 17 0 0.16 0.1
 -9 17 0 0.07 0.11
 9 17 0 0.03 0.12
 -9 17 0 -0.05 0.09
 -9 17 0 0.06 0.09
 9 17 0 -0.03 0.06
 -9 17 0 -0.08 0.12
 9 17 0 0 0.05
 10 -17 0 0.13 0.09
 10 -17 0 0.24 0.14
 10 -17 0 0 0.12
 -10 -17 0 0.02 0.08
 -10 -17 0 0.17 0.13
 10 -17 0 0.1 0.12
 -10 -17 0 0.13 0.09
 -10 -17 0 -0.01 0.09
 -10 -17 0 0.14 0.15
 10 17 0 0.04 0.05
 -10 17 0 0.17 0.1
 -10 17 0 0.13 0.12
 -10 17 0 0.11 0.13
 10 17 0 0 0.13
 10 17 0 0.02 0.11
 10 17 0 0.06 0.05
 -10 17 0 0.05 0.13
 11 -17 0 0.37 0.16
 11 -17 0 0.55 0.15
 -11 -17 0 0.36 0.14
 11 -17 0 0.41 0.14
 11 -17 0 0.79 0.16
 -11 -17 0 0.33 0.17
 -11 -17 0 0.46 0.09
 -11 -17 0 0.21 0.09
 11 17 0 0.45 0.16
 -11 17 0 0.4 0.14
 -11 17 0 0.53 0.12
 -11 17 0 0.63 0.16
 -11 17 0 0.61 0.15
 11 17 0 0.54 0.13
 12 -17 0 0.07 0.1
 12 -17 0 0.26 0.15
 -12 -17 0 0.09 0.16
 -12 -17 0 0.2 0.09
 12 -17 0 0.11 0.11
 -12 -17 0 0.52 0.16
 -12 17 0 0.22 0.13
 -12 17 0 0.34 0.15
 12 17 0 0.22 0.13
 13 -17 0 0.13 0.1
 13 -17 0 -0.12 0.11
 -13 -17 0 0.09 0.15
 -13 17 0 0 0.15
 -13 17 0 -0.02 0.13
 14 -17 0 -0.19 0.13
 14 -17 0 0.03 0.11
 -14 -17 0 -0.07 0.18
 -14 17 0 0.05 0.15
 -14 17 0 -0.07 0.17
 0 -18 0 5.47 0.34
 0 -18 0 4.69 0.31
 0 -18 0 4.67 0.32
 0 -18 0 5.15 0.35
 0 18 0 4.72 0.32
 0 18 0 5.11 0.34
 0 18 0 4.95 0.33
 0 18 0 4.79 0.34
 -1 -18 0 23.58 1.59
 1 -18 0 25.03 1.59
 1 -18 0 25.41 1.55
 -1 -18 0 25.98 1.59
 1 -18 0 25.45 1.6
 -1 -18 0 23.75 1.54
 1 -18 0 24.83 1.47
 -1 -18 0 25.09 1.47
 1 -18 0 25.43 1.47
 1 18 0 26.11 1.59
 -1 18 0 25.76 1.55
 1 18 0 25.89 1.47
 -1 18 0 26.11 1.59
 -1 18 0 25.81 1.47
 2 -18 0 0.07 0.05
 -2 -18 0 -0.16 0.06
 2 -18 0 -0.11 0.05
 2 -18 0 0 0.08
 -2 -18 0 -0.02 0.07
 -2 -18 0 0.07 0.06
 2 -18 0 0.01 0.08
 -2 -18 0 0.11 0.05
 2 -18 0 -0.05 0.07
 -2 -18 0 -0.07 0.07
 -2 18 0 0.08 0.07
 2 18 0 0.06 0.08
 2 18 0 -0.1 0.06
 -2 18 0 0.07 0.07
 -2 18 0 0.06 0.06
 -2 18 0 -0.06 0.08
 2 18 0 0.08 0.07
 2 18 0 0.03 0.06
 -2 18 0 -0.06 0.08
 2 18 0 0.01 0.06
 3 -18 0 4.66 0.31
 3 -18 0 5.32 0.32
 -3 -18 0 4.49 0.31
 -3 -18 0 4.45 0.31
 -3 -18 0 4.82 0.3
 -3 -18 0 4.32 0.33
 -3 18 0 4.83 0.3
 -3 18 0 5.09 0.32
 3 18 0 4.29 0.3
 -3 18 0 4.82 0.33
 3 18 0 4.74 0.33
 -3 18 0 4.97 0.32
 3 18 0 4.42 0.32
 3 18 0 4.4 0.32
 3 18 0 4.35 0.29
 4 -18 0 0.86 0.13
 -4 -18 0 1.32 0.12
 4 -18 0 1.15 0.12
 4 -18 0 0.86 0.14
 -4 -18 0 0.99 0.12
 4 -18 0 0.85 0.14
 4 -18 0 0.86 0.15
 -4 18 0 1.17 0.12
 4 18 0 1.14 0.11
 4 18 0 1.05 0.13
 -4 18 0 0.9 0.13
 -4 18 0 1.04 0.14
 4 18 0 1.2 0.13
 -4 18 0 0.93 0.14
 4 18 0 0.82 0.13
 -4 18 0 0.83 0.13
 4 18 0 1.1 0.12
 5 -18 0 1.66 0.18
 -5 -18 0 1.86 0.16
 -5 -18 0 1.83 0.17
 -5 -18 0 1.82 0.16
 5 -18 0 1.82 0.17
 -5 -18 0 2.11 0.18
 5 -18 0 1.95 0.19
 -5 -18 0 1.72 0.17
 5 -18 0 1.91 0.18
 5 18 0 1.71 0.18
 -5 18 0 1.85 0.19
 5 18 0 1.8 0.14
 -5 18 0 1.98 0.16
 5 18 0 1.86 0.16
 -5 18 0 1.93 0.17
 5 18 0 1.78 0.16
 -5 18 0 1.79 0.16
 5 18 0 1.85 0.16
 -5 18 0 2 0.18
 -6 -18 0 0.35 0.1
 -6 -18 0 0.6 0.13
 6 -18 0 0.3 0.09
 -6 -18 0 0.3 0.07
 6 -18 0 0.33 0.08
 -6 -18 0 0.54 0.09
 6 -18 0 0.3 0.12
 6 -18 0 0.3 0.1
 -6 -18 0 0.48 0.1
 6 18 0 0.61 0.1
 6 18 0 0.52 0.1
 -6 18 0 0.41 0.1
 6 18 0 0.41 0.1
 6 18 0 0.38 0.09
 6 18 0 0.42 0.08
 6 18 0 0.32 0.08
 -6 18 0 0.25 0.08
 -6 18 0 0.1 0.09
 -6 18 0 0.39 0.09
 -7 -18 0 0.37 0.09
 -7 -18 0 0.55 0.12
 7 -18 0 0.71 0.17
 -7 -18 0 0.82 0.15
 7 -18 0 0.66 0.14
 7 -18 0 0.78 0.14
 -7 -18 0 0.66 0.13
 7 -18 0 0.78 0.14
 7 -18 0 0.84 0.14
 -7 -18 0 0.59 0.14
 7 18 0 0.58 0.09
 -7 18 0 0.55 0.11
 -7 18 0 0.53 0.11
 7 18 0 0.74 0.15
 7 18 0 0.5 0.09
 7 18 0 0.52 0.1
 7 18 0 0.64 0.1
 7 18 0 0.58 0.11
 -7 18 0 1 0.14
 8 -18 0 -0.05 0.11
 8 -18 0 0.21 0.1
 -8 -18 0 -0.03 0.08
 -8 -18 0 -0.1 0.11
 8 -18 0 -0.1 0.09
 -8 -18 0 -0.06 0.1
 8 -18 0 0.08 0.1
 -8 -18 0 0.03 0.08
 -8 -18 0 -0.04 0.08
 8 18 0 -0.02 0.04
 -8 18 0 0.02 0.1
 8 18 0 -0.06 0.11
 8 18 0 -0.05 0.1
 -8 18 0 -0.05 0.1
 -8 18 0 -0.05 0.1
 8 18 0 0.01 0.06
 8 18 0 -0.03 0.05
 -9 -18 0 0.45 0.1
 -9 -18 0 0.41 0.1
 9 -18 0 0.44 0.11
 9 -18 0 0.38 0.13
 9 -18 0 0.45 0.11
 -9 -18 0 0.54 0.1
 -9 -18 0 0.51 0.13
 -9 -18 0 0.48 0.14
 9 -18 0 0.4 0.14
 9 -18 0 0.38 0.13
 9 18 0 0.69 0.14
 -9 18 0 0.44 0.12
 9 18 0 0.58 0.13
 -9 18 0 0.48 0.12
 9 18 0 0.45 0.1
 9 18 0 0.53 0.09
 -9 18 0 0.52 0.14
 -9 18 0 0.4 0.11
 -10 -18 0 0.22 0.13
 -10 -18 0 0.12 0.1
 -10 -18 0 0.04 0.09
 10 -18 0 0.09 0.13
 -10 -18 0 0.12 0.15
 -10 -18 0 0.11 0.1
 10 -18 0 0.18 0.14
 10 -18 0 0.19 0.13
 10 -18 0 0.16 0.11
 10 18 0 0.19 0.05
 10 18 0 0.3 0.12
 -10 18 0 0.04 0.12
 10 18 0 0.16 0.06
 -10 18 0 0.14 0.11
 -10 18 0 0.25 0.15
 10 18 0 0.23 0.15
 -11 -18 0 1.12 0.22
 -11 -18 0 1.07 0.19
 11 -18 0 0.81 0.18
 -11 -18 0 1.04 0.15
 11 -18 0 1.08 0.19
 11 -18 0 1.4 0.27
 -11 -18 0 1.07 0.23
 11 -18 0 1.1 0.23
 11 -18 0 0.98 0.17
 -11 18 0 0.9 0.17
 11 18 0 1.2 0.21
 11 18 0 1.27 0.22
 -11 18 0 1.13 0.24
 11 18 0 1.21 0.09
 11 18 0 1.11 0.09
 -11 18 0 0.93 0.18
 -11 18 0 1.06 0.23
 12 -18 0 -0.04 0.1
 -12 -18 0 -0.01 0.16
 12 -18 0 -0.05 0.11
 -12 -18 0 -0.06 0.14
 12 -18 0 0.18 0.16
 12 18 0 0.01 0.13
 -12 18 0 0.04 0.15
 -12 18 0 0.12 0.13
 13 -18 0 -0.11 0.12
 13 -18 0 0.16 0.11
 -13 -18 0 0.09 0.17
 -13 18 0 -0.01 0.13
 -13 18 0 0.1 0.16
 14 -18 0 0.2 0.11
 -14 -18 0 0.22 0.18
 14 -18 0 -0.07 0.14
 -14 18 0 0.24 0.16
 -14 18 0 0.07 0.17
 0 -19 0 0.03 0.07
 0 -19 0 -0.02 0.06
 0 -19 0 -0.07 0.06
 0 -19 0 0 0.07
 0 19 0 -0.05 0.07
 0 19 0 -0.04 0.07
 0 19 0 0.07 0.08
 0 19 0 0 0.08
 -1 -19 0 5.75 0.36
 1 -19 0 5.47 0.38
 -1 -19 0 5.81 0.36
 1 -19 0 5.06 0.37
 1 -19 0 5.82 0.36
 1 -19 0 5.26 0.35
 -1 -19 0 5.32 0.37
 1 19 0 6.1 0.38
 1 19 0 5.31 0.37
 -1 19 0 5.77 0.37
 -1 19 0 5.64 0.35
 -1 19 0 5.61 0.38
 -1 19 0 5.5 0.35
 1 19 0 5.49 0.35
 1 19 0 5.01 0.38
 1 19 0 5.42 0.35
 -2 -19 0 1.31 0.15
 2 -19 0 0.93 0.15
 -2 -19 0 0.93 0.13
 2 -19 0 1.19 0.14
 -2 -19 0 1.23 0.11
 2 -19 0 0.95 0.13
 -2 -19 0 1.13 0.12
 2 -19 0 0.94 0.11
 -2 -19 0 1.09 0.14
 2 -19 0 1 0.12
 -2 19 0 1.03 0.13
 2 19 0 1.2 0.14
 -2 19 0 0.94 0.13
 -2 19 0 1.2 0.13
 2 19 0 1.08 0.14
 2 19 0 1.13 0.13
 -2 19 0 1.18 0.14
 2 19 0 1.25 0.14
 -2 19 0 1.08 0.15
 2 19 0 1.32 0.12
 -3 -19 0 0.14 0.08
 3 -19 0 0.14 0.09
 3 -19 0 0.16 0.06
 -3 -19 0 0.23 0.06
 3 -19 0 0.19 0.08
 -3 -19 0 0.19 0.06
 -3 -19 0 0.17 0.08
 3 -19 0 0.17 0.07
 -3 -19 0 0.08 0.09
 -3 -19 0 0.02 0.06
 3 -19 0 0.29 0.09
 3 19 0 0.18 0.07
 3 19 0 0.1 0.08
 -3 19 0 0.14 0.09
 -3 19 0 0.03 0.08
 3 19 0 0.08 0.06
 -3 19 0 0.06 0.08
 -3 19 0 0.16 0.09
 3 19 0 0.1 0.07
 3 19 0 0.21 0.07
 -4 -19 0 0.21 0.08
 -4 -19 0 0.23 0.06
 4 -19 0 0.12 0.08
 -4 -19 0 0.01 0.06
 -4 -19 0 0.2 0.09
 4 -19 0 0.09 0.09
 -4 -19 0 0.06 0.07
 4 -19 0 0.13 0.08
 4 -19 0 0.11 0.07
 -4 -19 0 -0.04 0.06
 4 -19 0 0.02 0.09
 4 19 0 0.22 0.07
 -4 19 0 0.07 0.08
 4 19 0 0.08 0.06
 -4 19 0 -0.01 0.09
 4 19 0 0.1 0.08
 4 19 0 0.1 0.09
 4 19 0 0.24 0.07
 -4 19 0 0.1 0.08
 -4 19 0 0.16 0.08
 -5 -19 0 1.15 0.14
 5 -19 0 1.33 0.15
 5 -19 0 0.97 0.16
 5 -19 0 1.22 0.16
 -5 -19 0 1.11 0.14
 -5 -19 0 1.27 0.14
 5 -19 0 1.15 0.18
 5 -19 0 1.31 0.16
 5 19 0 1.11 0.14
 5 19 0 1.27 0.14
 5 19 0 1.39 0.15
 -5 19 0 1.22 0.14
 -5 19 0 1.1 0.16
 5 19 0 1.19 0.12
 5 19 0 1.42 0.14
 -5 19 0 1.27 0.15
 -5 19 0 1.22 0.13
 -6 -19 0 0.83 0.13
 -6 -19 0 0.89 0.14
 6 -19 0 0.99 0.18
 6 -19 0 1.23 0.15
 6 -19 0 1.24 0.15
 -6 -19 0 1.03 0.15
 -6 -19 0 0.78 0.15
 6 -19 0 0.99 0.16
 -6 -19 0 0.96 0.13
 6 19 0 0.72 0.13
 6 19 0 0.75 0.13
 -6 19 0 1.2 0.15
 6 19 0 0.73 0.15
 -6 19 0 0.9 0.16
 6 19 0 1.03 0.12
 6 19 0 0.96 0.13
 -6 19 0 1.03 0.15
 6 19 0 0.84 0.11
 -6 19 0 1.02 0.14
 7 -19 0 0.96 0.16
 -7 -19 0 1.14 0.16
 -7 -19 0 1.22 0.15
 7 -19 0 0.86 0.15
 -7 -19 0 1.03 0.17
 7 -19 0 0.82 0.19
 7 -19 0 1.2 0.16
 7 -19 0 0.8 0.19
 -7 -19 0 0.99 0.14
 -7 -19 0 0.95 0.17
 7 19 0 1.05 0.16
 7 19 0 1.08 0.14
 -7 19 0 0.68 0.16
 7 19 0 1.13 0.11
 7 19 0 1.03 0.12
 7 19 0 1.05 0.17
 7 19 0 1.02 0.13
 -7 19 0 0.91 0.17
 -7 19 0 1.02 0.15
 8 -19 0 0.11 0.09
 8 -19 0 0.25 0.11
 8 -19 0 0.13 0.1
 -8 -19 0 0.24 0.09
 -8 -19 0 0.22 0.09
 -8 -19 0 0.3 0.13
 8 -19 0 0.23 0.13
 -8 -19 0 0.16 0.09
 -8 -19 0 0.2 0.11
 8 -19 0 0.16 0.13
 -8 19 0 -0.09 0.11
 8 19 0 0.09 0.06
 -8 19 0 0.07 0.1
 8 19 0 0.32 0.12
 8 19 0 0.2 0.11
 -8 19 0 0.05 0.11
 -8 19 0 0.28 0.1
 8 19 0 0.19 0.06
 8 19 0 0.21 0.05
 -9 -19 0 0.11 0.12
 -9 -19 0 -0.05 0.1
 9 -19 0 0.03 0.12
 -9 -19 0 0.06 0.1
 -9 -19 0 0 0.09
 -9 -19 0 0.02 0.13
 9 -19 0 -0.06 0.12
 9 -19 0 -0.02 0.1
 9 -19 0 0.05 0.1
 -9 19 0 -0.04 0.11
 -9 19 0 -0.15 0.11
 9 19 0 -0.02 0.07
 9 19 0 0 0.05
 9 19 0 -0.08 0.12
 9 19 0 0.01 0.13
 -9 19 0 -0.02 0.11
 -10 -19 0 0.2 0.14
 10 -19 0 0.24 0.14
 10 -19 0 0.1 0.1
 10 -19 0 0.2 0.11
 10 -19 0 0.1 0.13
 -10 -19 0 0.07 0.1
 10 -19 0 0.09 0.16
 -10 -19 0 0.03 0.09
 10 19 0 0.15 0.06
 -10 19 0 0.07 0.11
 10 19 0 0.1 0.07
 10 19 0 0.23 0.15
 -10 19 0 0.31 0.16
 -10 19 0 0.23 0.12
 -10 19 0 0.29 0.12
 10 19 0 0.15 0.12
 -11 -19 0 0.16 0.15
 11 -19 0 0.21 0.16
 11 -19 0 0.06 0.15
 11 -19 0 0 0.1
 -11 -19 0 0.08 0.1
 11 -19 0 0.05 0.11
 11 19 0 0.23 0.05
 -11 19 0 -0.04 0.12
 -11 19 0 0.22 0.17
 11 19 0 0.15 0.06
 -11 19 0 0.11 0.12
 -11 19 0 0.01 0.14
 -12 -19 0 -0.26 0.14
 12 -19 0 -0.11 0.11
 12 -19 0 0.05 0.11
 -12 19 0 -0.1 0.12
 -12 19 0 0.05 0.12
 -12 19 0 0.04 0.15
 12 19 0 -0.06 0.14
 13 -19 0 -0.07 0.13
 -13 -19 0 0.22 0.17
 13 -19 0 0.1 0.11
 -13 19 0 0.09 0.16
 -13 19 0 0.18 0.17
 0 -20 0 4.5 0.35
 0 -20 0 4.44 0.31
 0 -20 0 4.51 0.34
 0 -20 0 5.1 0.34
 0 20 0 5.29 0.33
 0 20 0 5.11 0.35
 0 20 0 5.37 0.35
 1 -20 0 -0.03 0.07
 -1 -20 0 -0.01 0.08
 -1 -20 0 -0.04 0.06
 -1 -20 0 -0.03 0.06
 1 -20 0 0.03 0.08
 1 -20 0 -0.04 0.08
 1 -20 0 0 0.07
 -1 -20 0 -0.03 0.06
 1 -20 0 -0.03 0.05
 -1 -20 0 0.04 0.08
 -1 20 0 0.12 0.08
 -1 20 0 -0.03 0.07
 1 20 0 -0.02 0.07
 1 20 0 -0.04 0.09
 -1 20 0 0.06 0.09
 -1 20 0 0.03 0.07
 1 20 0 -0.11 0.08
 1 20 0 -0.05 0.07
 -1 20 0 -0.06 0.07
 1 20 0 0.01 0.08
 2 -20 0 4.21 0.28
 2 -20 0 4.65 0.31
 -2 -20 0 3.85 0.26
 2 -20 0 3.82 0.28
 2 -20 0 4.4 0.28
 -2 -20 0 4.28 0.3
 2 -20 0 4.11 0.29
 -2 -20 0 3.86 0.29
 -2 -20 0 4.05 0.28
 -2 20 0 3.97 0.28
 2 20 0 4.36 0.29
 2 20 0 4.37 0.27
 2 20 0 3.63 0.29
 -2 20 0 4.17 0.29
 2 20 0 3.55 0.28
 -2 20 0 4.17 0.28
 -2 20 0 3.95 0.3
 2 20 0 4.18 0.29
 3 -20 0 0.29 0.1
 -3 -20 0 0.26 0.08
 -3 -20 0 0.31 0.09
 -3 -20 0 0.39 0.09
 3 -20 0 0.36 0.09
 3 -20 0 0.26 0.08
 -3 -20 0 0.29 0.09
 -3 -20 0 0.39 0.09
 3 -20 0 0.47 0.1
 3 -20 0 0.49 0.09
 -3 20 0 0.3 0.09
 3 20 0 0.29 0.07
 -3 20 0 0.32 0.1
 -3 20 0 0.26 0.09
 3 20 0 0.23 0.07
 3 20 0 0.28 0.09
 3 20 0 0.3 0.09
 -3 20 0 0.21 0.1
 3 20 0 0.43 0.09
 -4 -20 0 0.11 0.08
 4 -20 0 0.12 0.07
 4 -20 0 0 0.1
 -4 -20 0 0.11 0.06
 4 -20 0 0.12 0.1
 4 -20 0 0.01 0.08
 -4 -20 0 0.12 0.08
 -4 -20 0 -0.02 0.06
 -4 -20 0 0.21 0.06
 -4 -20 0 0.18 0.09
 4 -20 0 0.21 0.09
 4 20 0 0.12 0.06
 4 20 0 0.13 0.07
 -4 20 0 0.04 0.08
 -4 20 0 0.06 0.08
 -4 20 0 0.2 0.1
 4 20 0 0.03 0.08
 4 20 0 0.16 0.09
 -4 20 0 -0.01 0.09
 -4 20 0 0.25 0.07
 5 -20 0 0.42 0.1
 5 -20 0 0.3 0.1
 -5 -20 0 0.57 0.13
 5 -20 0 0.57 0.12
 -5 -20 0 0.59 0.11
 -5 -20 0 0.75 0.12
 -5 -20 0 0.51 0.1
 5 -20 0 0.47 0.12
 5 -20 0 0.49 0.11
 -5 20 0 0.42 0.1
 -5 20 0 0.7 0.12
 5 20 0 0.3 0.09
 5 20 0 0.51 0.1
 -5 20 0 0.4 0.11
 5 20 0 0.56 0.12
 5 20 0 0.62 0.12
 5 20 0 0.63 0.12
 -5 20 0 0.71 0.14
 -6 -20 0 1.43 0.16
 -6 -20 0 1.43 0.18
 6 -20 0 1.58 0.18
 6 -20 0 1.62 0.17
 6 -20 0 1.55 0.17
 6 -20 0 1.51 0.2
 -6 -20 0 1.32 0.15
 -6 -20 0 1.29 0.16
 6 20 0 1.48 0.16
 -6 20 0 1.66 0.17
 6 20 0 1.5 0.15
 6 20 0 1.49 0.16
 6 20 0 1.27 0.16
 -6 20 0 1.71 0.18
 -6 20 0 1.37 0.17
 6 20 0 1.42 0.13
 -7 -20 0 0.75 0.15
 -7 -20 0 0.78 0.16
 7 -20 0 0.34 0.12
 7 -20 0 0.57 0.11
 -7 -20 0 0.41 0.12
 -7 -20 0 0.73 0.14
 7 -20 0 0.73 0.16
 7 -20 0 0.62 0.14
 7 -20 0 0.71 0.12
 -7 -20 0 0.42 0.1
 -7 20 0 0.71 0.13
 -7 20 0 0.73 0.15
 7 20 0 0.56 0.12
 7 20 0 0.46 0.09
 7 20 0 0.55 0.12
 7 20 0 0.66 0.11
 -7 20 0 0.53 0.12
 7 20 0 0.63 0.1
 7 20 0 0.44 0.08
 8 -20 0 1.87 0.24
 -8 -20 0 1.93 0.24
 8 -20 0 2.19 0.23
 8 -20 0 2.08 0.25
 -8 -20 0 2.15 0.2
 -8 -20 0 2.39 0.23
 -8 -20 0 2.09 0.22
 8 -20 0 2.03 0.21
 8 -20 0 1.8 0.21
 8 20 0 2.21 0.16
 8 20 0 2.09 0.16
 8 20 0 1.95 0.21
 8 20 0 2.08 0.23
 8 20 0 2.08 0.19
 -8 20 0 2.11 0.23
 -8 20 0 2.14 0.24
 -8 20 0 2.33 0.21
 8 20 0 2.03 0.17
 -9 -20 0 0.22 0.13
 -9 -20 0 -0.02 0.1
 -9 -20 0 0.06 0.1
 9 -20 0 0.09 0.14
 9 -20 0 0.28 0.15
 9 -20 0 0.05 0.13
 9 20 0 -0.02 0.07
 -9 20 0 -0.12 0.12
 9 20 0 -0.01 0.06
 9 20 0 0.07 0.13
 9 20 0 -0.12 0.12
 -9 20 0 0.13 0.13
 -9 20 0 0.07 0.12
 -10 -20 0 3.52 0.26
 10 -20 0 3.41 0.27
 10 -20 0 3.45 0.33
 10 -20 0 3.18 0.28
 -10 -20 0 3.35 0.29
 10 20 0 3.41 0.23
 10 20 0 3.43 0.22
 10 20 0 3.23 0.29
 -10 20 0 2.79 0.31
 -10 20 0 3.44 0.3
 -10 20 0 3 0.3
 10 20 0 3.21 0.3
 -10 20 0 3.41 0.28
 11 -20 0 0 0.17
 11 -20 0 -0.03 0.11
 11 -20 0 -0.08 0.11
 -11 -20 0 -0.21 0.16
 -11 20 0 -0.02 0.17
 -11 20 0 0.04 0.14
 -11 20 0 0.11 0.12
 -11 20 0 0 0.14
 11 20 0 -0.01 0.14
 11 20 0 -0.03 0.06
 -12 -20 0 -0.06 0.16
 12 -20 0 0.07 0.11
 12 -20 0 -0.14 0.11
 -12 20 0 -0.04 0.14
 -12 20 0 0.11 0.16
 -13 -20 0 0.45 0.18
 13 -20 0 -0.11 0.13
 13 -20 0 0.08 0.11
 -13 20 0 -0.1 0.17
 -13 20 0 0.07 0.16
 0 -21 0 0.01 0.06
 0 -21 0 -0.04 0.07
 0 -21 0 0.01 0.07
 0 -21 0 0.03 0.09
 0 -21 0 0.07 0.08
 0 21 0 -0.06 0.09
 0 21 0 0.05 0.08
 0 21 0 -0.01 0.07
 0 21 0 -0.02 0.07
 0 21 0 0.08 0.08
 -1 -21 0 1.34 0.14
 1 -21 0 1.71 0.18
 1 -21 0 1.58 0.15
 -1 -21 0 1.55 0.18
 1 -21 0 1.62 0.15
 -1 -21 0 1.35 0.15
 1 -21 0 1.79 0.16
 1 -21 0 1.91 0.16
 -1 -21 0 1.21 0.18
 1 21 0 1.54 0.15
 -1 21 0 1.8 0.16
 1 21 0 1.59 0.16
 -1 21 0 1.73 0.17
 1 21 0 1.81 0.16
 -1 21 0 1.9 0.17
 1 21 0 1.38 0.17
 1 21 0 1.32 0.17
 -1 21 0 1.85 0.17
 -1 21 0 1.72 0.17
 2 -21 0 1.58 0.16
 -2 -21 0 1.77 0.16
 -2 -21 0 2.17 0.15
 -2 -21 0 1.67 0.16
 2 -21 0 1.82 0.16
 -2 -21 0 1.99 0.18
 -2 -21 0 2.08 0.19
 2 -21 0 1.96 0.18
 2 -21 0 1.77 0.19
 -2 21 0 1.6 0.18
 -2 21 0 1.81 0.18
 -2 21 0 1.89 0.18
 2 21 0 1.74 0.16
 2 21 0 2.13 0.18
 2 21 0 2.03 0.19
 -2 21 0 1.92 0.19
 2 21 0 1.88 0.18
 2 21 0 1.85 0.18
 -2 21 0 1.68 0.18
 3 -21 0 0.85 0.13
 -3 -21 0 0.62 0.11
 -3 -21 0 0.57 0.1
 -3 -21 0 0.55 0.09
 3 -21 0 0.42 0.11
 -3 -21 0 0.65 0.13
 3 -21 0 0.76 0.1
 3 -21 0 0.52 0.09
 -3 -21 0 0.55 0.1
 3 -21 0 0.81 0.14
 -3 -21 0 0.51 0.11
 -3 21 0 0.4 0.11
 -3 21 0 0.74 0.14
 3 21 0 0.48 0.1
 3 21 0 0.39 0.09
 -3 21 0 0.53 0.1
 3 21 0 0.53 0.11
 3 21 0 0.58 0.13
 -3 21 0 0.65 0.14
 3 21 0 0.59 0.11
 -4 -21 0 0.71 0.15
 4 -21 0 0.61 0.14
 -4 -21 0 0.79 0.13
 -4 -21 0 0.46 0.1
 4 -21 0 0.27 0.09
 4 -21 0 0.26 0.11
 4 -21 0 0.45 0.09
 -4 -21 0 0.44 0.08
 4 -21 0 0.45 0.12
 4 21 0 0.62 0.13
 4 21 0 0.59 0.13
 -4 21 0 0.34 0.11
 4 21 0 0.77 0.15
 -4 21 0 0.56 0.11
 -4 21 0 0.46 0.11
 4 21 0 0.56 0.12
 -4 21 0 0.44 0.11
 -4 21 0 0.39 0.1
 4 21 0 0.52 0.1
 5 -21 0 0.23 0.09
 5 -21 0 0.33 0.11
 -5 -21 0 0.29 0.1
 5 -21 0 0.09 0.12
 -5 -21 0 0.53 0.12
 -5 -21 0 0.35 0.09
 -5 -21 0 0.21 0.08
 5 -21 0 0.1 0.1
 5 -21 0 0.32 0.09
 5 21 0 0.33 0.08
 -5 21 0 0.44 0.11
 5 21 0 0.33 0.08
 5 21 0 0.35 0.1
 5 21 0 0.26 0.09
 5 21 0 0.48 0.08
 -5 21 0 0.15 0.11
 -5 21 0 0.27 0.09
 -5 21 0 0.29 0.1
 6 -21 0 0.09 0.13
 6 -21 0 -0.02 0.09
 -6 -21 0 -0.04 0.08
 6 -21 0 0.09 0.11
 -6 -21 0 0.23 0.11
 6 -21 0 0.01 0.09
 -6 -21 0 0.07 0.09
 6 21 0 0.04 0.08
 6 21 0 0.03 0.09
 -6 21 0 0.17 0.11
 6 21 0 0.06 0.07
 -6 21 0 -0.04 0.1
 -6 21 0 -0.06 0.08
 6 21 0 0.09 0.09
 6 21 0 0.07 0.07
 -7 -21 0 0.17 0.12
 7 -21 0 0.06 0.12
 7 -21 0 0.07 0.11
 7 -21 0 0.1 0.13
 7 -21 0 -0.15 0.09
 -7 -21 0 0.03 0.1
 7 21 0 -0.08 0.07
 7 21 0 0.13 0.12
 -7 21 0 -0.01 0.1
 7 21 0 0.04 0.08
 -7 21 0 -0.26 0.11
 7 21 0 0.15 0.07
 -7 21 0 -0.18 0.12
 7 21 0 0.06 0.09
 7 21 0 -0.01 0.11
 -8 -21 0 0.81 0.16
 8 -21 0 0.71 0.17
 -8 -21 0 0.93 0.17
 8 -21 0 0.36 0.12
 8 -21 0 1.13 0.23
 8 -21 0 0.57 0.13
 -8 -21 0 0.89 0.17
 8 21 0 0.63 0.12
 8 21 0 0.69 0.11
 -8 21 0 0.67 0.15
 8 21 0 0.68 0.1
 -8 21 0 0.32 0.13
 8 21 0 0.78 0.14
 8 21 0 0.87 0.18
 -8 21 0 0.6 0.12
 8 21 0 0.58 0.15
 -9 -21 0 -0.04 0.13
 9 -21 0 -0.02 0.1
 -9 -21 0 0.04 0.11
 9 -21 0 0.14 0.14
 9 -21 0 0.05 0.17
 9 21 0 -0.04 0.14
 9 21 0 -0.02 0.08
 9 21 0 -0.01 0.06
 -9 21 0 -0.16 0.14
 9 21 0 -0.04 0.12
 9 21 0 0.04 0.05
 9 21 0 0.03 0.05
 -9 21 0 -0.17 0.12
 -9 21 0 0.12 0.12
 -9 21 0 -0.04 0.12
 10 -21 0 0.12 0.16
 -10 -21 0 0.06 0.11
 10 -21 0 0.01 0.11
 -10 -21 0 0.11 0.16
 -10 -21 0 0.04 0.12
 10 -21 0 0 0.18
 10 -21 0 -0.04 0.11
 -10 21 0 -0.04 0.12
 -10 21 0 0.07 0.13
 -10 21 0 0.05 0.14
 10 21 0 0.19 0.08
 -10 21 0 -0.23 0.14
 10 21 0 -0.05 0.13
 11 -21 0 0.16 0.12
 11 -21 0 -0.02 0.18
 11 -21 0 0.35 0.12
 -11 -21 0 -0.05 0.17
 -11 21 0 0.02 0.14
 -11 21 0 -0.15 0.14
 11 21 0 -0.11 0.13
 11 21 0 0.02 0.07
 -11 21 0 0.05 0.12
 -11 21 0 -0.21 0.17
 11 21 0 0.01 0.06
 -12 -21 0 0.23 0.17
 12 -21 0 0.33 0.13
 12 -21 0 0.5 0.14
 -12 21 0 0.31 0.17
 -12 21 0 0.17 0.14
 -12 21 0 0.38 0.14
 -13 -21 0 0.24 0.21
 13 -21 0 -0.05 0.11
 13 -21 0 -0.12 0.13
 -13 21 0 0 0.14
 -13 21 0 -0.14 0.17
 0 -22 0 0.02 0.09
 0 -22 0 -0.04 0.07
 0 -22 0 -0.12 0.08
 0 -22 0 0.01 0.07
 0 -22 0 -0.03 0.09
 0 22 0 0 0.1
 0 22 0 0.02 0.08
 0 22 0 -0.06 0.08
 0 22 0 0.02 0.08
 0 22 0 -0.08 0.07
 1 -22 0 1.88 0.17
 -1 -22 0 1.45 0.15
 -1 -22 0 1.5 0.18
 1 -22 0 1.91 0.16
 -1 -22 0 1.48 0.16
 -1 -22 0 1.54 0.15
 1 -22 0 1.56 0.18
 1 -22 0 1.51 0.15
 -1 -22 0 1.59 0.18
 1 22 0 1.68 0.16
 -1 22 0 1.57 0.19
 -1 22 0 1.9 0.16
 -1 22 0 1.63 0.18
 1 22 0 1.79 0.18
 -1 22 0 1.59 0.17
 -1 22 0 1.82 0.16
 1 22 0 1.52 0.16
 1 22 0 1.54 0.16
 1 22 0 1.41 0.18
 -2 -22 0 0.05 0.1
 2 -22 0 0.09 0.1
 2 -22 0 0.05 0.07
 -2 -22 0 0.07 0.07
 2 -22 0 0.14 0.09
 2 -22 0 0.06 0.06
 2 -22 0 0.23 0.09
 -2 -22 0 0.12 0.06
 -2 -22 0 0.05 0.09
 2 22 0 -0.11 0.07
 2 22 0 0.1 0.09
 -2 22 0 -0.02 0.1
 -2 22 0 0.09 0.09
 2 22 0 0.01 0.08
 2 22 0 -0.08 0.1
 -2 22 0 0.03 0.08
 -2 22 0 -0.02 0.08
 -2 22 0 0.21 0.08
 2 22 0 0.08 0.09
 3 -22 0 0.76 0.11
 -3 -22 0 0.41 0.1
 -3 -22 0 0.59 0.13
 3 -22 0 0.81 0.15
 3 -22 0 0.64 0.12
 3 -22 0 0.31 0.09
 3 -22 0 0.71 0.12
 -3 -22 0 0.49 0.12
 -3 22 0 0.64 0.13
 3 22 0 0.46 0.11
 3 22 0 0.51 0.1
 -3 22 0 0.79 0.14
 -3 22 0 0.57 0.11
 -3 22 0 0.41 0.12
 3 22 0 0.55 0.11
 -3 22 0 0.85 0.15
 3 22 0 0.6 0.12
 3 22 0 0.67 0.14
 -4 -22 0 -0.09 0.1
 4 -22 0 0.07 0.09
 -4 -22 0 -0.01 0.09
 4 -22 0 -0.03 0.09
 -4 -22 0 -0.06 0.09
 4 -22 0 -0.07 0.1
 4 -22 0 0.25 0.12
 -4 22 0 0.01 0.11
 4 22 0 -0.04 0.07
 4 22 0 0.03 0.1
 -4 22 0 -0.07 0.09
 4 22 0 0 0.07
 4 22 0 -0.11 0.09
 -4 22 0 0.11 0.09
 -4 22 0 0.1 0.11
 4 22 0 0.12 0.09
 -5 -22 0 -0.12 0.09
 5 -22 0 -0.14 0.12
 -5 -22 0 0.07 0.1
 5 -22 0 -0.03 0.11
 5 -22 0 -0.18 0.09
 5 -22 0 0.01 0.1
 5 22 0 0.01 0.07
 -5 22 0 -0.19 0.09
 5 22 0 -0.03 0.1
 -5 22 0 -0.1 0.11
 -5 22 0 0.03 0.11
 5 22 0 0.04 0.09
 -5 22 0 0 0.08
 5 22 0 0.07 0.07
 -6 -22 0 0.15 0.12
 6 -22 0 0.02 0.12
 -6 -22 0 0.09 0.09
 -6 -22 0 0.2 0.1
 6 -22 0 0.19 0.1
 6 -22 0 0.02 0.14
 6 22 0 0.17 0.08
 -6 22 0 0.09 0.1
 -6 22 0 -0.04 0.11
 6 22 0 0.07 0.07
 6 22 0 0.1 0.1
 -6 22 0 -0.05 0.12
 6 22 0 0.19 0.08
 6 22 0 0.27 0.1
 -7 -22 0 0.66 0.16
 7 -22 0 0.76 0.16
 -7 -22 0 0.8 0.15
 7 -22 0 0.8 0.18
 -7 -22 0 0.79 0.17
 7 -22 0 0.43 0.11
 7 -22 0 0.66 0.15
 -7 22 0 0.6 0.15
 7 22 0 0.66 0.15
 7 22 0 0.69 0.11
 7 22 0 0.88 0.12
 -7 22 0 0.77 0.17
 7 22 0 1.05 0.17
 7 22 0 0.69 0.14
 7 22 0 1.11 0.14
 -7 22 0 0.66 0.14
 8 -22 0 2.81 0.3
 -8 -22 0 2.74 0.25
 8 -22 0 3.13 0.25
 8 -22 0 2.46 0.3
 -8 -22 0 2.65 0.24
 -8 -22 0 2.66 0.27
 8 22 0 2.85 0.21
 8 22 0 2.36 0.21
 8 22 0 2.72 0.22
 -8 22 0 2.84 0.25
 8 22 0 2.97 0.2
 8 22 0 2.43 0.26
 8 22 0 2.31 0.25
 -8 22 0 2.35 0.27
 9 -22 0 -0.09 0.16
 9 -22 0 -0.12 0.12
 -9 -22 0 0.2 0.13
 9 -22 0 0.01 0.11
 9 -22 0 0.05 0.18
 9 22 0 0 0.05
 9 22 0 0.06 0.06
 -9 22 0 -0.18 0.15
 9 22 0 0.07 0.07
 9 22 0 -0.1 0.08
 -9 22 0 0.33 0.14
 -9 22 0 0.03 0.12
 -9 22 0 -0.13 0.13
 9 22 0 0.06 0.12
 10 -22 0 0.92 0.19
 10 -22 0 0.61 0.17
 -10 -22 0 0.71 0.15
 -10 -22 0 0.81 0.18
 10 -22 0 0.57 0.13
 -10 22 0 0.73 0.16
 10 22 0 0.77 0.11
 -10 22 0 0.43 0.16
 10 22 0 1.03 0.14
 -10 22 0 0.7 0.17
 -10 22 0 0.8 0.15
 11 -22 0 0.2 0.12
 11 -22 0 0.19 0.13
 -11 -22 0 0.13 0.18
 11 22 0 0.04 0.14
 -11 22 0 0.03 0.13
 11 22 0 0.14 0.06
 -11 22 0 -0.05 0.15
 11 22 0 0.16 0.08
 -11 22 0 0.35 0.13
 12 -22 0 0.04 0.12
 12 -22 0 0.04 0.12
 -12 -22 0 -0.03 0.16
 -12 22 0 0.08 0.15
 -12 22 0 -0.09 0.16
 -12 22 0 -0.11 0.13
 12 22 0 -0.03 0.05
 0 -23 0 0.04 0.1
 0 -23 0 0.04 0.1
 0 -23 0 -0.11 0.08
 0 23 0 0 0.08
 0 23 0 0.06 0.08
 0 23 0 0.08 0.11
 0 23 0 0.07 0.08
 0 23 0 0.05 0.09
 1 -23 0 -0.05 0.09
 1 -23 0 0.11 0.09
 1 -23 0 0.14 0.1
 -1 -23 0 -0.05 0.1
 -1 -23 0 -0.13 0.07
 1 23 0 0.05 0.09
 1 23 0 -0.08 0.08
 -1 23 0 0.08 0.12
 -1 23 0 0.02 0.09
 -1 23 0 -0.04 0.09
 -1 23 0 0.05 0.08
 1 23 0 0.07 0.1
 -1 23 0 0.24 0.09
 1 23 0 0.09 0.08
 -2 -23 0 0.7 0.16
 2 -23 0 0.92 0.15
 -2 -23 0 0.62 0.12
 2 -23 0 0.79 0.16
 2 -23 0 0.6 0.12
 2 23 0 0.54 0.13
 -2 23 0 0.67 0.13
 2 23 0 0.98 0.16
 2 23 0 0.58 0.12
 -2 23 0 0.68 0.13
 -2 23 0 0.52 0.11
 -2 23 0 0.57 0.14
 2 23 0 0.54 0.12
 -2 23 0 0.88 0.15
 2 23 0 0.88 0.16
 3 -23 0 0.56 0.13
 -3 -23 0 0.57 0.14
 -3 -23 0 0.82 0.16
 3 -23 0 0.52 0.11
 3 -23 0 0.57 0.12
 -3 -23 0 0.54 0.11
 3 23 0 0.56 0.13
 -3 23 0 0.49 0.12
 3 23 0 0.71 0.12
 3 23 0 0.53 0.11
 -3 23 0 0.69 0.15
 -3 23 0 0.54 0.11
 3 23 0 0.57 0.12
 -3 23 0 0.59 0.13
 3 23 0 0.43 0.11
 -3 23 0 0.35 0.12
 4 -23 0 0.32 0.13
 4 -23 0 0.15 0.11
 -4 -23 0 0.42 0.12
 -4 -23 0 0.41 0.11
 4 -23 0 0.34 0.13
 -4 -23 0 0.3 0.1
 -4 23 0 0.43 0.11
 4 23 0 0.39 0.11
 4 23 0 0.2 0.12
 4 23 0 0.3 0.09
 -4 23 0 0.49 0.12
 -4 23 0 0.24 0.12
 4 23 0 0.27 0.1
 4 23 0 0.2 0.08
 5 -23 0 0.27 0.13
 -5 -23 0 0.22 0.1
 -5 -23 0 0.79 0.15
 5 -23 0 0.39 0.14
 -5 -23 0 0.37 0.11
 5 -23 0 0.24 0.1
 5 23 0 0.65 0.11
 5 23 0 0.67 0.15
 -5 23 0 0.32 0.1
 -5 23 0 0.37 0.13
 5 23 0 0.43 0.11
 -5 23 0 0.48 0.13
 -5 23 0 0.19 0.11
 5 23 0 0.42 0.09
 -6 -23 0 0.71 0.12
 6 -23 0 0.7 0.17
 6 -23 0 0.68 0.17
 6 -23 0 0.78 0.14
 -6 -23 0 0.62 0.14
 6 23 0 0.81 0.16
 -6 23 0 0.51 0.15
 -6 23 0 0.53 0.13
 6 23 0 0.74 0.12
 6 23 0 0.83 0.15
 6 23 0 0.66 0.16
 6 23 0 0.71 0.16
 -7 -23 0 3.39 0.27
 -7 -23 0 3.48 0.27
 7 -23 0 3.08 0.29
 7 -23 0 3.21 0.28
 -7 -23 0 3.22 0.28
 7 23 0 3.6 0.29
 7 23 0 3.19 0.28
 -7 23 0 3.01 0.3
 7 23 0 3.09 0.26
 7 23 0 3.05 0.25
 7 23 0 3.33 0.23
 -7 23 0 2.91 0.27
 8 -23 0 0.57 0.14
 -8 -23 0 0.47 0.14
 8 -23 0 0.54 0.13
 8 -23 0 0.67 0.19
 -8 -23 0 0.5 0.13
 8 23 0 0.53 0.11
 8 23 0 0.6 0.16
 -8 23 0 0.58 0.13
 -8 23 0 0.34 0.14
 -8 23 0 0.1 0.15
 8 23 0 0.63 0.14
 8 23 0 0.85 0.12
 8 23 0 0.46 0.09
 -9 -23 0 0.12 0.13
 9 -23 0 0.05 0.18
 9 -23 0 -0.01 0.1
 9 -23 0 -0.05 0.12
 -9 23 0 0.14 0.13
 9 23 0 -0.06 0.13
 9 23 0 0.05 0.1
 9 23 0 0.06 0.06
 -9 23 0 0.28 0.12
 9 23 0 0.03 0.07
 9 23 0 0.1 0.08
 -9 23 0 -0.21 0.16
 -9 23 0 -0.18 0.13
 10 -23 0 0.15 0.12
 10 -23 0 0.14 0.2
 10 -23 0 0.11 0.13
 -10 -23 0 0.13 0.16
 -10 23 0 0.09 0.18
 10 23 0 0.04 0.07
 -10 23 0 -0.13 0.14
 -10 23 0 0.2 0.14
 10 23 0 0.12 0.09
 -10 23 0 0.21 0.14
 -11 -23 0 0.35 0.19
 11 -23 0 0.32 0.13
 11 -23 0 0.46 0.14
 -11 23 0 0.24 0.16
 11 23 0 0.32 0.09
 11 23 0 0.32 0.07
 -11 23 0 0.23 0.14
 -11 23 0 0.39 0.16
 11 23 0 0.31 0.16
 -12 -23 0 0.37 0.21
 12 -23 0 0.09 0.13
 -12 23 0 -0.14 0.17
 -12 23 0 -0.24 0.15
 -12 23 0 0.15 0.15
 12 23 0 0.09 0.06
 12 23 0 0.03 0.06
 0 -24 0 2.02 0.2
 0 -24 0 1.63 0.18
 0 -24 0 1.88 0.19
 0 24 0 1.9 0.19
 0 24 0 1.87 0.19
 0 24 0 1.94 0.18
 0 24 0 1.61 0.18
 0 24 0 1.62 0.2
 -1 -24 0 0.24 0.11
 -1 -24 0 0.13 0.1
 1 -24 0 0.15 0.1
 1 -24 0 0.23 0.11
 1 -24 0 0.26 0.11
 1 24 0 0.27 0.1
 1 24 0 0.22 0.11
 1 24 0 0.11 0.12
 -1 24 0 0.11 0.08
 -1 24 0 0.29 0.12
 -1 24 0 0.16 0.09
 -1 24 0 0.06 0.1
 -1 24 0 0.1 0.09
 1 24 0 0.04 0.09
 1 24 0 0.18 0.08
 -2 -24 0 1.66 0.22
 2 -24 0 2.1 0.2
 2 -24 0 1.86 0.2
 2 -24 0 2.1 0.21
 2 24 0 1.92 0.18
 -2 24 0 1.9 0.2
 -2 24 0 2.07 0.21
 2 24 0 1.8 0.22
 -2 24 0 2.15 0.2
 -2 24 0 1.9 0.21
 2 24 0 1.68 0.2
 2 24 0 2.15 0.19
 2 24 0 1.96 0.2
 -2 24 0 2.19 0.21
 -3 -24 0 0.05 0.12
 -3 -24 0 0.06 0.1
 3 -24 0 -0.01 0.11
 3 -24 0 0.03 0.09
 3 -24 0 -0.05 0.12
 -3 -24 0 -0.01 0.11
 3 24 0 0.06 0.11
 -3 24 0 -0.13 0.1
 3 24 0 0.05 0.1
 3 24 0 -0.05 0.08
 -3 24 0 -0.07 0.09
 3 24 0 -0.02 0.08
 -3 24 0 -0.06 0.12
 3 24 0 0.04 0.11
 -3 24 0 -0.02 0.11
 4 -24 0 0.43 0.11
 -4 -24 0 0.94 0.18
 -4 -24 0 0.69 0.12
 4 -24 0 0.67 0.14
 -4 -24 0 0.68 0.15
 4 -24 0 0.54 0.14
 -4 24 0 0.52 0.12
 4 24 0 0.65 0.12
 4 24 0 0.53 0.11
 -4 24 0 0.69 0.14
 4 24 0 0.51 0.12
 -4 24 0 0.56 0.12
 4 24 0 0.55 0.09
 -4 24 0 0.48 0.12
 4 24 0 0.67 0.14
 5 -24 0 -0.26 0.11
 -5 -24 0 0.11 0.11
 -5 -24 0 0.14 0.11
 -5 -24 0 0 0.1
 5 -24 0 0.27 0.15
 5 -24 0 0 0.11
 5 24 0 0.06 0.11
 5 24 0 0.09 0.11
 -5 24 0 -0.16 0.11
 -5 24 0 0.09 0.1
 -5 24 0 0.08 0.14
 5 24 0 0.14 0.1
 -5 24 0 0.1 0.12
 5 24 0 0.09 0.08
 5 24 0 0.06 0.09
 6 -24 0 1.84 0.27
 -6 -24 0 1.99 0.23
 -6 -24 0 2.07 0.23
 6 -24 0 2.17 0.23
 6 -24 0 1.93 0.22
 -6 24 0 2.24 0.25
 -6 24 0 1.82 0.24
 6 24 0 2.34 0.23
 6 24 0 2.06 0.23
 6 24 0 2.32 0.18
 -6 24 0 1.83 0.22
 6 24 0 2.48 0.22
 6 24 0 2.5 0.21
 -7 -24 0 2.51 0.25
 -7 -24 0 2.23 0.24
 -7 -24 0 2.22 0.24
 7 -24 0 2.53 0.27
 7 -24 0 2.82 0.23
 7 -24 0 2.23 0.24
 -7 24 0 2.05 0.26
 -7 24 0 2.06 0.24
 7 24 0 2.05 0.26
 7 24 0 2.03 0.22
 7 24 0 2.19 0.22
 -7 24 0 2.45 0.24
 -8 -24 0 3.82 0.28
 -8 -24 0 2.64 0.28
 -8 -24 0 3.13 0.3
 8 -24 0 3.11 0.28
 8 -24 0 2.62 0.34
 -8 24 0 2.8 0.29
 8 24 0 2.94 0.25
 -8 24 0 2.42 0.3
 -8 24 0 3.28 0.29
 8 24 0 3.32 0.25
 8 24 0 3.3 0.25
 8 24 0 3.5 0.3
 8 24 0 3.46 0.23
 9 -24 0 0.18 0.13
 9 -24 0 0.02 0.19
 9 -24 0 0.14 0.12
 -9 -24 0 0.39 0.15
 -9 24 0 0.28 0.13
 -9 24 0 0.15 0.15
 -9 24 0 0.09 0.16
 -9 24 0 0.23 0.14
 9 24 0 0.22 0.08
 9 24 0 0.14 0.1
 9 24 0 0.17 0.07
 9 24 0 0.24 0.08
 10 -24 0 0.95 0.21
 -10 -24 0 1.31 0.21
 10 -24 0 1.62 0.21
 -10 24 0 1.1 0.26
 -10 24 0 1.71 0.2
 10 24 0 1.4 0.18
 10 24 0 1.27 0.14
 -10 24 0 1.75 0.28
 -10 24 0 1.25 0.23
 11 -24 0 0.23 0.14
 -11 -24 0 0.12 0.16
 11 -24 0 0.06 0.13
 -11 24 0 -0.12 0.15
 11 24 0 -0.07 0.09
 -11 24 0 0.17 0.13
 11 24 0 0.09 0.07
 11 24 0 -0.07 0.16
 -12 -24 0 0.29 0.21
 12 -24 0 -0.22 0.13
 12 -24 0 0.18 0.13
 -12 24 0 -0.16 0.13
 -12 24 0 0.16 0.15
 12 24 0 0.08 0.07
 12 24 0 0.1 0.07
 0 -25 0 0.1 0.11
 0 -25 0 0.02 0.1
 0 25 0 0.12 0.09
 0 25 0 0.02 0.11
 0 25 0 0.02 0.1
 0 25 0 0.14 0.13
 0 25 0 -0.08 0.08
 -1 -25 0 0.01 0.11
 1 -25 0 -0.1 0.11
 1 -25 0 -0.12 0.1
 1 -25 0 -0.16 0.1
 -1 -25 0 0.05 0.11
 -1 25 0 -0.11 0.08
 -1 25 0 0.19 0.11
 -1 25 0 0 0.1
 1 25 0 0.05 0.09
 -1 25 0 -0.01 0.1
 1 25 0 0.03 0.1
 1 25 0 -0.04 0.08
 1 25 0 -0.08 0.12
 -1 25 0 -0.14 0.13
 1 25 0 -0.02 0.09
 2 -25 0 0.18 0.13
 2 -25 0 -0.16 0.1
 2 -25 0 -0.11 0.12
 -2 -25 0 0.08 0.1
 -2 -25 0 0.06 0.13
 2 25 0 -0.01 0.09
 -2 25 0 -0.06 0.11
 2 25 0 -0.2 0.08
 -2 25 0 -0.12 0.09
 2 25 0 0.09 0.11
 2 25 0 -0.11 0.08
 -2 25 0 -0.05 0.13
 2 25 0 -0.08 0.12
 -2 25 0 -0.09 0.09
 -3 -25 0 -0.02 0.12
 -3 -25 0 -0.13 0.11
 3 -25 0 0.15 0.14
 3 -25 0 -0.05 0.12
 -3 -25 0 -0.04 0.11
 3 -25 0 -0.1 0.1
 3 25 0 -0.01 0.11
 3 25 0 -0.13 0.08
 -3 25 0 -0.19 0.08
 3 25 0 -0.02 0.08
 3 25 0 -0.09 0.12
 -3 25 0 -0.05 0.11
 3 25 0 0.07 0.11
 -3 25 0 -0.11 0.11
 -3 25 0 -0.04 0.13
 4 -25 0 0.49 0.16
 4 -25 0 0.42 0.12
 -4 -25 0 0.79 0.14
 4 -25 0 0.5 0.13
 -4 -25 0 0.91 0.14
 -4 -25 0 0.71 0.17
 4 25 0 0.6 0.15
 -4 25 0 0.52 0.12
 4 25 0 0.67 0.16
 4 25 0 0.47 0.12
 4 25 0 0.62 0.12
 -4 25 0 0.43 0.12
 4 25 0 0.64 0.13
 -4 25 0 0.52 0.15
 -4 25 0 0.42 0.14
 -5 -25 0 1.42 0.22
 -5 -25 0 2.01 0.22
 5 -25 0 1.54 0.22
 -5 -25 0 1.88 0.21
 5 -25 0 1.54 0.26
 5 -25 0 1.52 0.21
 5 25 0 1.63 0.17
 5 25 0 2.03 0.22
 5 25 0 2.02 0.21
 -5 25 0 1.18 0.22
 -5 25 0 1.48 0.2
 -5 25 0 1.44 0.19
 5 25 0 1.65 0.2
 5 25 0 1.73 0.19
 -6 -25 0 4.65 0.34
 6 -25 0 4.45 0.35
 6 -25 0 3.53 0.38
 -6 -25 0 4.45 0.36
 -6 25 0 4.07 0.34
 6 25 0 5.11 0.34
 -6 25 0 3.83 0.36
 -6 25 0 4.64 0.35
 6 25 0 4.29 0.33
 6 25 0 5.01 0.35
 -7 -25 0 0.35 0.13
 7 -25 0 0.43 0.18
 7 -25 0 0.36 0.12
 7 -25 0 0.33 0.14
 -7 -25 0 0.35 0.14
 -7 -25 0 0.42 0.14
 7 25 0 0.37 0.11
 -7 25 0 0.3 0.15
 7 25 0 0.36 0.09
 7 25 0 0.32 0.12
 7 25 0 0.4 0.15
 7 25 0 0.72 0.15
 -7 25 0 0.38 0.12
 -7 25 0 0.12 0.14
 8 -25 0 0.32 0.2
 8 -25 0 0.47 0.13
 -8 -25 0 0.15 0.13
 8 -25 0 0.33 0.14
 8 25 0 0.53 0.12
 -8 25 0 0.52 0.14
 -8 25 0 0.18 0.16
 8 25 0 0.24 0.1
 8 25 0 0.37 0.15
 8 25 0 0.6 0.13
 -8 25 0 0.08 0.14
 8 25 0 0.44 0.09
 9 -25 0 1.7 0.23
 9 -25 0 1.69 0.22
 -9 -25 0 1.69 0.25
 -9 -25 0 1.59 0.22
 9 25 0 1.56 0.27
 -9 25 0 1.15 0.26
 9 25 0 1.67 0.2
 -9 25 0 1.95 0.22
 9 25 0 1.55 0.15
 -9 25 0 1.74 0.24
 -9 25 0 1.48 0.24
 9 25 0 1.46 0.16
 10 -25 0 0.32 0.15
 -10 -25 0 0.32 0.19
 10 -25 0 0.12 0.12
 -10 25 0 0.12 0.15
 10 25 0 0.42 0.11
 10 25 0 0.18 0.08
 -10 25 0 0.31 0.19
 -10 25 0 0.18 0.15
 11 -25 0 1.29 0.22
 11 -25 0 0.6 0.14
 -11 -25 0 0.66 0.19
 11 25 0 0.66 0.12
 11 25 0 0.6 0.12
 -11 25 0 0.81 0.19
 -11 25 0 0.61 0.19
 0 -26 0 0 0.13
 0 -26 0 -0.02 0.11
 0 26 0 0.05 0.12
 0 26 0 -0.14 0.09
 0 26 0 -0.08 0.1
 0 26 0 0.08 0.1
 0 26 0 0 0.14
 1 -26 0 0.72 0.15
 1 -26 0 0.52 0.12
 -1 -26 0 0.76 0.14
 -1 -26 0 0.77 0.15
 -1 26 0 0.45 0.13
 -1 26 0 0.81 0.15
 -1 26 0 0.35 0.11
 1 26 0 0.39 0.13
 1 26 0 0.6 0.15
 1 26 0 0.59 0.12
 1 26 0 0.59 0.13
 1 26 0 0.45 0.1
 -1 26 0 0.63 0.14
 -1 26 0 0.47 0.11
 2 -26 0 -0.2 0.11
 2 -26 0 0.08 0.14
 2 -26 0 0 0.12
 -2 -26 0 -0.03 0.12
 -2 26 0 -0.16 0.09
 2 26 0 0.07 0.14
 -2 26 0 -0.07 0.11
 2 26 0 -0.09 0.1
 2 26 0 0.01 0.12
 -2 26 0 0.02 0.11
 2 26 0 -0.07 0.09
 2 26 0 -0.06 0.09
 -2 26 0 0.03 0.13
 3 -26 0 0.77 0.15
 3 -26 0 0.52 0.15
 3 -26 0 0.65 0.14
 -3 -26 0 0.59 0.14
 -3 -26 0 0.4 0.13
 3 26 0 0.61 0.13
 -3 26 0 0.49 0.16
 3 26 0 0.53 0.11
 3 26 0 0.45 0.14
 3 26 0 0.44 0.11
 3 26 0 0.35 0.13
 -3 26 0 0.65 0.15
 -3 26 0 0.43 0.11
 -3 26 0 0.72 0.15
 -4 -26 0 0.24 0.14
 4 -26 0 0.02 0.13
 4 -26 0 0.08 0.12
 4 -26 0 0.09 0.16
 -4 -26 0 0.18 0.11
 -4 -26 0 0.07 0.12
 -4 26 0 0.04 0.11
 4 26 0 0.11 0.09
 4 26 0 0.13 0.12
 4 26 0 0.25 0.13
 4 26 0 0.12 0.12
 4 26 0 0.1 0.1
 -4 26 0 0.19 0.16
 -4 26 0 0.19 0.14
 5 -26 0 0.17 0.17
 -5 -26 0 0.28 0.14
 -5 -26 0 0.39 0.15
 -5 -26 0 0 0.12
 5 -26 0 0.06 0.14
 -5 26 0 -0.07 0.12
 -5 26 0 0.22 0.14
 -5 26 0 0.13 0.11
 5 26 0 0.13 0.12
 5 26 0 0.18 0.13
 5 26 0 0.18 0.12
 5 26 0 0.07 0.09
 -6 -26 0 1.01 0.21
 -6 -26 0 1.12 0.2
 6 -26 0 0.85 0.2
 6 -26 0 0.66 0.17
 6 -26 0 0.64 0.2
 -6 26 0 1.07 0.2
 -6 26 0 0.96 0.2
 -6 26 0 0.64 0.16
 6 26 0 1.35 0.19
 6 26 0 1.11 0.19
 6 26 0 1.1 0.15
 6 26 0 1.19 0.2
 -7 -26 0 3.26 0.31
 7 -26 0 2.95 0.35
 7 -26 0 3.51 0.31
 -7 -26 0 3.9 0.31
 7 -26 0 3.3 0.32
 -7 26 0 3.84 0.33
 7 26 0 3.45 0.25
 7 26 0 3.28 0.32
 7 26 0 3.79 0.28
 -7 26 0 3.9 0.32
 7 26 0 2.99 0.3
 8 -26 0 0.1 0.12
 -8 -26 0 0.31 0.15
 -8 -26 0 -0.13 0.13
 8 -26 0 0.39 0.15
 8 -26 0 0.3 0.22
 8 26 0 0.25 0.09
 -8 26 0 0.2 0.18
 8 26 0 0.15 0.09
 8 26 0 0.25 0.13
 -9 -26 0 0.32 0.18
 9 -26 0 0.14 0.12
 9 -26 0 0.23 0.15
 -9 -26 0 0.22 0.15
 9 26 0 0.22 0.08
 9 26 0 0.16 0.12
 9 26 0 0.14 0.09
 -9 26 0 0.21 0.12
 -9 26 0 0.4 0.18
 -9 26 0 -0.11 0.15
 10 -26 0 0.09 0.14
 10 -26 0 0.02 0.13
 -10 -26 0 -0.1 0.19
 10 26 0 0.04 0.08
 -10 26 0 -0.08 0.17
 -10 26 0 0.02 0.15
 -10 26 0 0.1 0.13
 -10 26 0 0.35 0.19
 10 26 0 0.12 0.06
 -11 -26 0 0.13 0.2
 11 -26 0 -0.12 0.14
 11 -26 0 -0.12 0.13
 -11 26 0 -0.1 0.13
 11 26 0 0.12 0.18
 -11 26 0 -0.03 0.16
 -11 26 0 -0.15 0.17
 11 26 0 -0.03 0.08
 0 -27 0 -0.1 0.14
 0 -27 0 0.07 0.11
 0 27 0 -0.18 0.1
 0 27 0 -0.03 0.14
 0 27 0 0.13 0.12
 0 27 0 -0.12 0.09
 0 27 0 -0.01 0.1
 1 -27 0 -0.05 0.12
 -1 -27 0 0.02 0.11
 1 -27 0 0.12 0.13
 -1 -27 0 -0.07 0.13
 1 27 0 0.08 0.15
 1 27 0 0.05 0.1
 -1 27 0 -0.06 0.11
 1 27 0 0.01 0.11
 -1 27 0 -0.08 0.11
 -1 27 0 0.08 0.15
 -1 27 0 -0.14 0.1
 1 27 0 -0.14 0.09
 1 27 0 0.28 0.14
 -2 -27 0 -0.13 0.12
 2 -27 0 0.04 0.11
 2 -27 0 -0.09 0.13
 2 27 0 -0.01 0.1
 -2 27 0 -0.11 0.09
 2 27 0 -0.09 0.11
 -2 27 0 0.04 0.15
 2 27 0 0.06 0.12
 -2 27 0 -0.06 0.11
 -2 27 0 0.08 0.1
 2 27 0 -0.1 0.09
 3 -27 0 1.01 0.2
 -3 -27 0 1.1 0.21
 -3 -27 0 1.18 0.19
 3 -27 0 1.29 0.2
 -3 -27 0 1.12 0.23
 -3 27 0 0.93 0.21
 -3 27 0 1.29 0.2
 3 27 0 0.97 0.17
 -3 27 0 0.99 0.18
 -3 27 0 1.08 0.24
 3 27 0 1.3 0.23
 3 27 0 1.25 0.18
 3 27 0 1.26 0.16
 3 27 0 0.86 0.16
 -4 -27 0 0.27 0.16
 4 -27 0 0.06 0.17
 -4 -27 0 0.04 0.13
 -4 -27 0 0.01 0.12
 4 -27 0 0.2 0.15
 4 27 0 0.13 0.13
 4 27 0 0.08 0.1
 4 27 0 0.07 0.14
 -4 27 0 0.07 0.16
 -4 27 0 0.03 0.11
 -4 27 0 -0.11 0.14
 4 27 0 0.06 0.12
 -4 27 0 -0.11 0.11
 5 -27 0 1.51 0.25
 -5 -27 0 1.31 0.24
 -5 -27 0 1.57 0.23
 5 -27 0 1.2 0.22
 5 -27 0 1.39 0.22
 5 27 0 1.52 0.17
 5 27 0 1.68 0.23
 -5 27 0 1.28 0.24
 5 27 0 1.41 0.23
 -5 27 0 1.62 0.22
 5 27 0 1.48 0.19
 -6 -27 0 0.2 0.14
 -6 -27 0 0.46 0.17
 6 -27 0 0.29 0.19
 6 -27 0 0.34 0.12
 6 -27 0 0.29 0.15
 6 27 0 0.29 0.11
 6 27 0 0.2 0.13
 -6 27 0 0.11 0.15
 6 27 0 0.36 0.1
 6 27 0 0.22 0.13
 7 -27 0 0.04 0.12
 -7 -27 0 0 0.14
 7 -27 0 0.05 0.21
 -7 -27 0 -0.3 0.13
 7 27 0 0.08 0.1
 -7 27 0 0.01 0.17
 7 27 0 0.1 0.13
 7 27 0 -0.1 0.08
 7 27 0 -0.16 0.15
 8 -27 0 -0.03 0.23
 -8 -27 0 -0.1 0.14
 8 -27 0 0.1 0.12
 8 -27 0 0.15 0.16
 -8 -27 0 0.34 0.18
 -8 27 0 0.14 0.18
 8 27 0 0.17 0.14
 8 27 0 0.06 0.14
 -8 27 0 0.29 0.15
 -8 27 0 -0.11 0.14
 8 27 0 0.14 0.09
 8 27 0 0.2 0.1
 -9 -27 0 0.11 0.16
 9 -27 0 0.16 0.12
 9 -27 0 0.16 0.15
 -9 27 0 0.18 0.2
 -9 27 0 -0.14 0.16
 9 27 0 0.03 0.09
 9 27 0 0.03 0.16
 -9 27 0 0.36 0.16
 9 27 0 0.06 0.08
 10 -27 0 0.08 0.16
 -10 -27 0 0.13 0.17
 10 -27 0 -0.07 0.12
 -10 27 0 -0.26 0.16
 10 27 0 0.01 0.09
 10 27 0 0.05 0.07
 10 27 0 0.08 0.17
 -10 27 0 -0.08 0.13
 -10 27 0 -0.09 0.17
 11 -27 0 0.44 0.17
 11 -27 0 0.01 0.14
 -11 -27 0 -0.03 0.18
 11 27 0 -0.05 0.19
 -11 27 0 0.04 0.19
 -11 27 0 0.06 0.14
 11 27 0 0.01 0.08
 -11 27 0 -0.1 0.17
 0 -28 0 0.25 0.13
 0 -28 0 0.05 0.14
 0 28 0 0.08 0.12
 0 28 0 0.1 0.15
 0 28 0 0.19 0.15
 -1 -28 0 -0.08 0.13
 1 -28 0 -0.04 0.14
 1 -28 0 0.04 0.11
 -1 -28 0 -0.2 0.14
 1 28 0 0.02 0.15
 -1 28 0 -0.33 0.12
 1 28 0 -0.11 0.1
 -1 28 0 -0.02 0.16
 1 28 0 -0.06 0.13
 -2 -28 0 1.78 0.24
 -2 -28 0 1.36 0.24
 2 -28 0 1.87 0.25
 2 -28 0 1.61 0.24
 2 28 0 1.67 0.24
 -2 28 0 1.43 0.26
 -2 28 0 1.79 0.22
 -3 -28 0 -0.13 0.13
 3 -28 0 -0.07 0.15
 3 -28 0 0.15 0.13
 -3 -28 0 -0.02 0.15
 -3 -28 0 0.08 0.14
 3 28 0 0.01 0.14
 3 28 0 0.12 0.13
 -3 28 0 -0.03 0.17
 -3 28 0 -0.04 0.14
 3 28 0 0.09 0.11
 4 -28 0 0.84 0.17
 4 -28 0 0.88 0.15
 -4 -28 0 0.7 0.17
 -4 -28 0 0.87 0.17
 -4 -28 0 0.64 0.15
 4 28 0 0.67 0.13
 4 28 0 0.85 0.16
 4 28 0 0.62 0.12
 -4 28 0 0.74 0.17
 4 28 0 1.1 0.23
 -4 28 0 0.51 0.14
 -4 28 0 0.84 0.21
 4 28 0 0.69 0.16
 5 -28 0 0.28 0.13
 5 -28 0 0.1 0.2
 -5 -28 0 0.16 0.14
 -5 -28 0 0.41 0.16
 -5 -28 0 0.4 0.14
 5 -28 0 0.29 0.16
 -5 28 0 0.2 0.14
 -5 28 0 0.32 0.14
 5 28 0 0.17 0.14
 5 28 0 0.16 0.11
 -5 28 0 0.37 0.17
 5 28 0 0.3 0.15
 5 28 0 0.2 0.14
 5 28 0 0.35 0.11
 -6 -28 0 0.02 0.15
 -6 -28 0 -0.31 0.13
 6 -28 0 0.18 0.22
 6 -28 0 0.09 0.16
 6 -28 0 0.1 0.13
 -6 28 0 -0.17 0.13
 -6 28 0 -0.01 0.17
 -6 28 0 -0.19 0.13
 6 28 0 0.05 0.13
 6 28 0 -0.12 0.14
 6 28 0 0.1 0.14
 6 28 0 -0.02 0.09
 6 28 0 0.03 0.11
 -7 -28 0 0.26 0.17
 -7 -28 0 -0.04 0.14
 7 -28 0 -0.12 0.12
 7 -28 0 0.23 0.16
 7 -28 0 -0.16 0.23
 7 28 0 -0.01 0.09
 -7 28 0 -0.05 0.15
 -7 28 0 0 0.18
 7 28 0 0.15 0.1
 7 28 0 -0.06 0.16
 -7 28 0 0.07 0.14
 -8 -28 0 0.09 0.16
 8 -28 0 0.08 0.12
 -8 -28 0 0.4 0.18
 8 -28 0 0.2 0.16
 -8 28 0 0.07 0.19
 8 28 0 0.34 0.1
 -8 28 0 -0.14 0.15
 8 28 0 0.18 0.15
 -8 28 0 0.41 0.15
 8 28 0 0.29 0.11
 9 -28 0 0.13 0.13
 9 -28 0 0.25 0.17
 -9 -28 0 0.29 0.18
 -9 28 0 0.2 0.21
 9 28 0 0.13 0.09
 9 28 0 0.13 0.09
 -9 28 0 -0.27 0.17
 -9 28 0 0.34 0.16
 10 -28 0 0.09 0.17
 -10 -28 0 0.17 0.21
 10 -28 0 0.08 0.13
 -10 28 0 0.05 0.17
 -10 28 0 0.31 0.16
 10 28 0 0.13 0.09
 -10 28 0 -0.13 0.17
 0 -29 0 -0.13 0.13
 0 -29 0 -0.16 0.15
 0 29 0 -0.09 0.12
 0 29 0 -0.13 0.1
 0 29 0 -0.12 0.16
 0 29 0 -0.15 0.11
 -1 -29 0 0.01 0.16
 1 -29 0 0.08 0.16
 -1 -29 0 -0.07 0.14
 1 -29 0 -0.03 0.13
 -1 29 0 -0.02 0.12
 -1 29 0 -0.19 0.12
 1 29 0 -0.04 0.1
 -1 29 0 -0.08 0.16
 1 29 0 0.09 0.15
 -1 29 0 -0.03 0.1
 1 29 0 -0.29 0.11
 1 29 0 0.08 0.14
 2 -29 0 0.02 0.14
 -2 -29 0 0.06 0.15
 2 -29 0 0.08 0.16
 -2 -29 0 -0.09 0.14
 2 29 0 -0.08 0.15
 2 29 0 0.05 0.15
 2 29 0 0 0.11
 -2 29 0 -0.15 0.14
 2 29 0 -0.17 0.11
 2 29 0 -0.03 0.11
 -2 29 0 0.16 0.18
 -2 29 0 0.11 0.12
 -2 29 0 -0.07 0.11
 3 -29 0 -0.05 0.16
 -3 -29 0 0.02 0.17
 -3 -29 0 -0.06 0.14
 -3 -29 0 0.08 0.13
 -3 29 0 -0.08 0.11
 3 29 0 0.02 0.13
 3 29 0 0.1 0.15
 -3 29 0 0.01 0.18
 -3 29 0 0.02 0.14
 3 29 0 0.07 0.1
 3 29 0 -0.06 0.1
 -3 29 0 -0.02 0.12
 3 29 0 -0.04 0.15
 -4 -29 0 0.82 0.17
 -4 -29 0 0.44 0.16
 4 -29 0 0.98 0.22
 4 -29 0 1.04 0.22
 -4 -29 0 0.95 0.19
 -4 29 0 0.72 0.16
 -4 29 0 0.6 0.14
 4 29 0 0.62 0.16
 4 29 0 0.85 0.2
 4 29 0 0.57 0.16
 -4 29 0 0.91 0.18
 4 29 0 0.63 0.16
 4 29 0 0.88 0.13
 5 -29 0 0.04 0.13
 5 -29 0 -0.14 0.16
 -5 -29 0 0.1 0.17
 -5 -29 0 -0.2 0.13
 5 29 0 0.08 0.11
 -5 29 0 -0.09 0.13
 5 29 0 0.01 0.14
 5 29 0 -0.02 0.15
 -5 29 0 0.03 0.16
 5 29 0 -0.25 0.14
 -5 29 0 -0.01 0.14
 6 -29 0 0.09 0.12
 6 -29 0 0.44 0.18
 -6 -29 0 0.19 0.17
 6 -29 0 0.38 0.23
 -6 -29 0 -0.24 0.15
 6 29 0 0.15 0.15
 6 29 0 0.29 0.11
 -6 29 0 0.17 0.14
 -6 29 0 0.21 0.18
 -7 -29 0 0.36 0.18
 7 -29 0 0.04 0.13
 7 -29 0 0.02 0.24
 7 -29 0 0.42 0.18
 -7 29 0 0.11 0.18
 7 29 0 0.21 0.1
 7 29 0 0.31 0.17
 -7 29 0 0.26 0.15
 -7 29 0 -0.1 0.15
 8 -29 0 0.61 0.18
 8 -29 0 0.26 0.14
 -8 -29 0 0.46 0.17
 -8 -29 0 0.18 0.17
 -8 29 0 0.22 0.15
 -8 29 0 0.49 0.2
 8 29 0 0.32 0.11
 8 29 0 0.33 0.11
 -8 29 0 -0.09 0.16
 8 29 0 0.35 0.16
 9 -29 0 0.27 0.13
 9 -29 0 0.1 0.17
 -9 -29 0 0.23 0.17
 -9 29 0 -0.02 0.18
 -9 29 0 0.22 0.17
 9 29 0 0.1 0.1
 9 29 0 0.13 0.09
 -9 29 0 -0.11 0.2
 0 -30 0 0.13 0.14
 0 -30 0 0.22 0.17
 0 30 0 0.28 0.13
 0 30 0 0.32 0.17
 0 30 0 0.35 0.12
 -1 -30 0 0.18 0.16
 1 -30 0 0.17 0.15
 1 -30 0 0.3 0.17
 -1 -30 0 0.28 0.15
 1 30 0 0.1 0.12
 1 30 0 0.41 0.18
 -1 30 0 0.42 0.19
 1 30 0 0.31 0.14
 -1 30 0 0.37 0.13
 1 30 0 0.37 0.18
 -1 30 0 0.29 0.14
 -1 30 0 0.31 0.13
 1 30 0 0.44 0.13
 -2 -30 0 0.02 0.16
 2 -30 0 0.13 0.16
 -2 -30 0 0.05 0.14
 -2 30 0 0.14 0.12
 -2 30 0 0.31 0.19
 -2 30 0 -0.05 0.14
 2 30 0 0.24 0.16
 2 30 0 -0.06 0.11
 2 30 0 0.1 0.11
 2 30 0 0.31 0.13
 -2 30 0 -0.03 0.12
 2 30 0 -0.02 0.17
 -3 -30 0 1.25 0.24
 3 -30 0 1.4 0.25
 3 -30 0 1.22 0.22
 -3 30 0 1.11 0.22
 3 30 0 0.98 0.19
 3 30 0 1.29 0.2
 3 30 0 0.89 0.17
 -3 30 0 1.01 0.21
 3 30 0 1.16 0.18
 -3 30 0 0.84 0.21
 -3 30 0 1.21 0.21
 3 30 0 1 0.19
 4 -30 0 0.79 0.18
 -4 -30 0 0.12 0.16
 4 -30 0 0.42 0.14
 -4 -30 0 0.53 0.19
 -4 -30 0 0.43 0.15
 -4 30 0 0.79 0.19
 4 30 0 0.35 0.15
 -4 30 0 0.55 0.14
 4 30 0 0.41 0.12
 4 30 0 0.58 0.17
 -4 30 0 0.75 0.17
 4 30 0 0.52 0.13
 -5 -30 0 0.45 0.15
 5 -30 0 0.17 0.18
 -5 -30 0 0.03 0.15
 5 -30 0 0.13 0.14
 5 30 0 0.23 0.11
 -5 30 0 0.03 0.14
 -5 30 0 -0.02 0.16
 5 30 0 0.34 0.15
 -5 30 0 0.16 0.13
 5 30 0 0.13 0.12
 -6 -30 0 0.07 0.16
 -6 -30 0 0.13 0.17
 6 -30 0 0.35 0.14
 6 30 0 0.2 0.16
 -6 30 0 -0.16 0.14
 6 30 0 0.18 0.12
 6 30 0 0.21 0.11
 -6 30 0 0.32 0.19
 -6 30 0 0.16 0.15
 -7 -30 0 -0.3 0.16
 7 -30 0 0.21 0.18
 7 -30 0 0.07 0.14
 -7 -30 0 0.05 0.15
 -7 30 0 0 0.15
 -7 30 0 0.02 0.19
 7 30 0 -0.15 0.1
 -7 30 0 -0.41 0.15
 7 30 0 0.03 0.11
 8 -30 0 0.11 0.18
 8 -30 0 0.1 0.13
 -8 -30 0 0.06 0.19
 -8 30 0 0.04 0.14
 -8 30 0 0.08 0.21
 -8 30 0 -0.31 0.16
 8 30 0 -0.01 0.1
 9 -30 0 0.09 0.13
 -9 -30 0 0.4 0.21
 9 -30 0 0.33 0.18
 9 30 0 0.2 0.1
 -9 30 0 0.44 0.19
 -9 30 0 -0.04 0.18
 9 30 0 0.16 0.1
 -9 30 0 -0.04 0.22
 0 -31 0 -0.28 0.14
 0 -31 0 -0.15 0.16
 0 31 0 0.13 0.19
 0 31 0 -0.15 0.11
 0 31 0 0.16 0.14
 0 31 0 -0.14 0.11
 -1 -31 0 0.06 0.18
 1 -31 0 -0.04 0.18
 -1 -31 0 -0.03 0.16
 -1 31 0 -0.02 0.13
 -1 31 0 0.02 0.19
 -1 31 0 0.14 0.12
 1 31 0 -0.11 0.12
 1 31 0 0.26 0.19
 1 31 0 -0.03 0.11
 1 31 0 0.08 0.11
 -2 -31 0 0.11 0.18
 -2 -31 0 -0.04 0.15
 2 -31 0 0.03 0.18
 2 -31 0 -0.08 0.14
 2 31 0 -0.06 0.16
 2 31 0 -0.13 0.13
 -2 31 0 0.01 0.12
 2 31 0 0.22 0.17
 -2 31 0 0.02 0.19
 2 31 0 -0.17 0.11
 -2 31 0 -0.04 0.13
 2 31 0 -0.1 0.11
 3 -31 0 0.34 0.17
 -3 -31 0 -0.03 0.14
 3 -31 0 -0.15 0.14
 -3 -31 0 0.04 0.19
 -3 -31 0 0.19 0.16
 3 31 0 -0.15 0.16
 3 31 0 -0.09 0.11
 3 31 0 -0.08 0.12
 3 31 0 0.08 0.11
 -3 31 0 0.12 0.16
 -3 31 0 0.23 0.2
 -3 31 0 -0.01 0.12
 -3 31 0 0.28 0.13
 -4 -31 0 -0.24 0.15
 -4 -31 0 -0.01 0.14
 4 -31 0 -0.05 0.14
 4 -31 0 0.12 0.18
 4 31 0 0.01 0.17
 4 31 0 -0.19 0.12
 -4 31 0 0.08 0.14
 -4 31 0 0.05 0.14
 4 31 0 0.01 0.11
 4 31 0 -0.25 0.11
 -4 31 0 -0.12 0.16
 -5 -31 0 0.32 0.16
 -5 -31 0 0.04 0.16
 5 -31 0 0.25 0.17
 5 -31 0 0.25 0.14
 -5 31 0 -0.01 0.17
 -5 31 0 -0.12 0.13
 -5 31 0 0.07 0.13
 5 31 0 0.17 0.15
 5 31 0 -0.01 0.12
 5 31 0 0.15 0.11
 6 -31 0 0.22 0.18
 -6 -31 0 -0.1 0.16
 -6 -31 0 0.03 0.18
 6 -31 0 0.17 0.15
 6 31 0 0.13 0.11
 -6 31 0 0.01 0.13
 -6 31 0 0.18 0.18
 -6 31 0 -0.15 0.14
 6 31 0 0.18 0.16
 6 31 0 0.15 0.12
 7 -31 0 0.14 0.17
 -7 -31 0 0.11 0.16
 7 -31 0 -0.07 0.12
 -7 -31 0 -0.44 0.17
 7 31 0 -0.03 0.1
 -7 31 0 -0.39 0.15
 7 31 0 0.03 0.12
 -7 31 0 -0.16 0.19
 7 31 0 -0.05 0.15
 -7 31 0 -0.19 0.15
 8 -31 0 0.09 0.13
 8 -31 0 0.49 0.2
 -8 -31 0 0.4 0.2
 8 31 0 0.2 0.12
 -8 31 0 0.11 0.15
 -8 31 0 0.28 0.23
 8 31 0 0.22 0.11
 0 -32 0 0.39 0.19
 0 32 0 0.52 0.22
 0 32 0 0.26 0.12
 0 32 0 0.15 0.13
 0 32 0 -0.06 0.13
 -1 -32 0 0.14 0.15
 1 -32 0 -0.02 0.15
 -1 -32 0 0.07 0.18
 1 -32 0 -0.01 0.2
 1 32 0 -0.02 0.12
 1 32 0 0.03 0.12
 -1 32 0 0.07 0.12
 -1 32 0 0.12 0.15
 -1 32 0 0.22 0.2
 -1 32 0 -0.01 0.12
 1 32 0 0.02 0.12
 -2 -32 0 0.77 0.19
 2 -32 0 0.53 0.2
 2 -32 0 0.48 0.17
 -2 -32 0 0.52 0.18
 -2 32 0 0.52 0.14
 2 32 0 0.29 0.14
 -2 32 0 0.39 0.17
 -2 32 0 0.81 0.19
 2 32 0 0.4 0.2
 -2 32 0 0.58 0.23
 2 32 0 0.69 0.15
 2 32 0 0.25 0.12
 3 -32 0 0.99 0.21
 -3 -32 0 0.77 0.2
 -3 -32 0 0.7 0.18
 -3 -32 0 1.04 0.22
 3 -32 0 1.22 0.25
 -3 32 0 0.61 0.15
 3 32 0 0.94 0.21
 3 32 0 0.91 0.18
 -3 32 0 0.86 0.17
 3 32 0 0.77 0.15
 -4 -32 0 -0.26 0.17
 -4 -32 0 -0.14 0.16
 4 -32 0 0.14 0.18
 4 -32 0 0.04 0.15
 -4 32 0 -0.02 0.18
 4 32 0 0.1 0.12
 -4 32 0 -0.06 0.14
 -4 32 0 0.17 0.13
 4 32 0 0.06 0.13
 4 32 0 0 0.12
 -5 -32 0 0.41 0.16
 -5 -32 0 0.17 0.18
 5 -32 0 0.29 0.16
 5 32 0 0.31 0.12
 5 32 0 0.3 0.13
 5 32 0 0.3 0.15
 -5 32 0 0.43 0.19
 -5 32 0 0.14 0.15
 -5 32 0 0.24 0.16
 6 -32 0 0.46 0.21
 6 -32 0 0.14 0.14
 -6 -32 0 -0.29 0.18
 -6 -32 0 -0.03 0.18
 -6 32 0 0.31 0.19
 6 32 0 0.15 0.11
 -6 32 0 0 0.14
 6 32 0 0.15 0.13
 -6 32 0 0.04 0.14
 -7 -32 0 0.45 0.2
 7 -32 0 0.49 0.21
 7 -32 0 -0.01 0.14
 -7 -32 0 -0.07 0.19
 -7 32 0 0.27 0.16
 7 32 0 0.16 0.16
 7 32 0 0.35 0.12
 7 32 0 0.43 0.13
 -7 32 0 0.27 0.22
 0 -33 0 -0.22 0.2
 0 -33 0 0.06 0.14
 0 33 0 -0.14 0.14
 0 33 0 0.13 0.13
 0 33 0 -0.16 0.12
 1 -33 0 0.54 0.2
 -1 -33 0 0.66 0.2
 1 -33 0 0.64 0.18
 1 33 0 0.38 0.15
 -1 33 0 0.18 0.14
 -1 33 0 0.59 0.15
 -1 33 0 0.44 0.13
 1 33 0 0.54 0.14
 1 33 0 0.49 0.14
 -2 -33 0 0.37 0.21
 2 -33 0 0.16 0.15
 2 -33 0 -0.14 0.19
 -2 -33 0 0.15 0.16
 2 33 0 0.3 0.13
 -2 33 0 0.21 0.13
 -2 33 0 0.31 0.13
 2 33 0 0.02 0.13
 -2 33 0 0.32 0.18
 -2 33 0 0.16 0.23
 2 33 0 0.84 0.18
 -3 -33 0 0.42 0.19
 3 -33 0 0.73 0.22
 -3 -33 0 0.69 0.19
 3 -33 0 0.64 0.17
 3 33 0 0.61 0.15
 3 33 0 0.88 0.19
 3 33 0 1.17 0.18
 -3 33 0 0.55 0.15
 -3 33 0 0.97 0.2
 -3 33 0 0.58 0.18
 4 -33 0 0.23 0.15
 -4 -33 0 0.13 0.17
 4 -33 0 0.36 0.21
 -4 -33 0 0.54 0.19
 4 33 0 0.24 0.14
 -4 33 0 0.43 0.15
 -4 33 0 0.2 0.18
 -4 33 0 0.15 0.14
 4 33 0 0.14 0.16
 4 33 0 0.52 0.13
 5 -33 0 0.63 0.16
 -5 -33 0 0.21 0.18
 -5 -33 0 0.63 0.18
 5 33 0 0.4 0.15
 -5 33 0 0.48 0.17
 5 33 0 0.39 0.13
 -5 33 0 0.26 0.14
 5 33 0 0.38 0.14
 6 -33 0 0.13 0.15
 -6 -33 0 -0.23 0.19
 6 -33 0 0.37 0.21
 -6 -33 0 -0.41 0.18
 6 33 0 -0.07 0.13
 -6 33 0 0.03 0.17
 -6 33 0 -0.16 0.15
 6 33 0 -0.17 0.11
 -6 33 0 0.04 0.2
 -7 -33 0 0.47 0.21
 7 -33 0 0.15 0.14
 7 -33 0 0.26 0.21
 -7 33 0 -0.28 0.15
 7 33 0 0.31 0.14
 -7 33 0 0.14 0.22
 7 33 0 0.14 0.11
 -7 33 0 0.31 0.18
 0 -34 0 -0.1 0.19
 0 -34 0 0 0.17
 0 34 0 -0.27 0.12
 0 34 0 -0.02 0.14
 0 34 0 -0.12 0.15
 -1 -34 0 0.77 0.23
 1 -34 0 0.57 0.17
 -1 -34 0 0.36 0.19
 1 -34 0 0.51 0.21
 -1 34 0 0.33 0.17
 1 34 0 0.94 0.22
 -1 34 0 0.34 0.16
 1 34 0 0.41 0.14
 -1 34 0 0.52 0.14
 1 34 0 0.6 0.16
 2 -34 0 0.24 0.17
 2 -34 0 -0.26 0.21
 2 34 0 -0.09 0.12
 -2 34 0 -0.06 0.14
 -2 34 0 -0.01 0.13
 -2 34 0 -0.15 0.16
 2 34 0 -0.1 0.14
 2 34 0 0.21 0.14
 3 -34 0 -0.05 0.17
 3 -34 0 -0.07 0.21
 -3 -34 0 -0.4 0.16
 -3 -34 0 0.14 0.16
 3 34 0 0.03 0.13
 3 34 0 -0.28 0.13
 -3 34 0 -0.11 0.15
 -3 34 0 -0.25 0.16
 3 34 0 -0.21 0.14
 -3 34 0 0.04 0.13
 -4 -34 0 0.21 0.18
 4 -34 0 0.11 0.22
 -4 -34 0 -0.12 0.19
 4 -34 0 -0.07 0.16
 4 34 0 -0.03 0.13
 -4 34 0 -0.29 0.17
 -4 34 0 0.08 0.16
 4 34 0 -0.33 0.14
 4 34 0 -0.01 0.13
 -4 34 0 -0.06 0.14
 5 -34 0 0.36 0.23
 5 -34 0 0.55 0.16
 -5 -34 0 0.59 0.18
 -5 -34 0 0.04 0.2
 -5 34 0 0.51 0.16
 5 34 0 0.14 0.14
 -5 34 0 0.17 0.16
 5 34 0 0.08 0.16
 -5 34 0 0.09 0.2
 5 34 0 0.44 0.13
 6 -34 0 -0.09 0.21
 -6 -34 0 -0.27 0.2
 -6 -34 0 0.16 0.2
 6 -34 0 -0.04 0.15
 6 34 0 -0.32 0.15
 -6 34 0 -0.25 0.15
 -6 34 0 0.07 0.22
 -6 34 0 0.01 0.17
 6 34 0 0.01 0.14
 6 34 0 0.09 0.12
 0 -35 0 -0.13 0.18
 0 -35 0 -0.03 0.22
 0 35 0 -0.01 0.12
 0 35 0 -0.08 0.15
 0 35 0 0.03 0.15
 1 -35 0 -0.1 0.23
 1 -35 0 0.16 0.18
 -1 -35 0 -0.17 0.18
 -1 35 0 0.18 0.13
 1 35 0 0.19 0.14
 1 35 0 0.16 0.15
 1 35 0 0.27 0.14
 -1 35 0 -0.07 0.13
 -1 35 0 -0.13 0.16
 2 -35 0 0.16 0.24
 -2 -35 0 0.01 0.17
 -2 -35 0 -0.04 0.18
 2 -35 0 0.15 0.18
 -2 35 0 -0.15 0.16
 -2 35 0 0.18 0.14
 -2 35 0 -0.03 0.13
 2 35 0 0.17 0.16
 2 35 0 0.51 0.16
 2 35 0 0.09 0.13
 3 -35 0 0.11 0.23
 -3 -35 0 0.31 0.2
 3 -35 0 0.05 0.18
 3 35 0 0 0.13
 -3 35 0 0.1 0.15
 -3 35 0 0.15 0.14
 -3 35 0 -0.04 0.19
 3 35 0 0.04 0.15
 3 35 0 0.01 0.13
 -4 -35 0 -0.04 0.17
 4 -35 0 0.1 0.17
 -4 -35 0 -0.14 0.18
 -4 35 0 0.03 0.2
 4 35 0 0.1 0.14
 -4 35 0 0.07 0.14
 4 35 0 0.14 0.13
 4 35 0 0.19 0.16
 -4 35 0 0.01 0.13
 0 -36 0 -0.2 0.17
 0 36 0 0.13 0.14
 0 36 0 -0.02 0.16
 0 36 0 0.15 0.14
 1 -36 0 -0.22 0.23
 1 -36 0 -0.05 0.19
 -1 -36 0 -0.41 0.17
 -1 36 0 -0.19 0.16
 -1 36 0 -0.01 0.15
 1 36 0 0.09 0.16
 -1 36 0 0.08 0.14
 1 36 0 -0.04 0.15
 1 36 0 -0.17 0.14
 -2 -36 0 -0.01 0.2
 -2 -36 0 -0.13 0.18
 2 -36 0 -0.22 0.24
 2 -36 0 0.01 0.17
 -2 36 0 0.06 0.14
 2 36 0 -0.09 0.14
 2 36 0 0.23 0.14
 -2 36 0 -0.24 0.18
 -2 36 0 -0.09 0.16
 2 36 0 0.18 0.14
 -3 -36 0 -0.36 0.19
 3 -36 0 -0.16 0.16
 -3 -36 0 -0.19 0.17
 3 -36 0 0.12 0.25
 3 36 0 0.07 0.14
 -3 36 0 0.16 0.17
 3 36 0 0.17 0.15
 3 36 0 0.07 0.14
 -3 36 0 0.02 0.14
 -3 36 0 -0.15 0.2
 -16 0 1 0.02 0.2
 -14 0 1 0.19 0.16
 14 0 -1 0.11 0.11
 -14 0 1 0.06 0.09
 -14 0 1 0.08 0.09
 -13 0 1 1.09 0.13
 13 0 -1 0.84 0.07
 13 0 -1 1.34 0.17
 -13 0 1 0.98 0.17
 12 0 -1 0.07 0.05
 -12 0 1 0.13 0.11
 12 0 -1 0.03 0.08
 -12 0 1 0.15 0.07
 12 0 -1 -0.01 0.04
 -12 0 1 0.02 0.06
 12 0 -1 -0.2 0.08
 11 0 -1 -0.02 0.03
 -11 0 1 0.02 0.06
 -11 0 1 -0.01 0.05
 11 0 -1 0.06 0.1
 11 0 -1 0.05 0.07
 -11 0 1 -0.08 0.09
 -11 0 1 -0.1 0.11
 11 0 -1 0.04 0.04
 11 0 -1 -0.03 0.07
 10 0 -1 0 0.06
 10 0 -1 0.02 0.07
 10 0 -1 0.07 0.04
 10 0 -1 -0.05 0.06
 10 0 -1 -0.05 0.08
 10 0 -1 -0.03 0.03
 -10 0 1 0 0.08
 -10 0 1 -0.01 0.09
 -10 0 1 -0.07 0.04
 -10 0 1 0.04 0.05
 9 0 -1 0.02 0.06
 -9 0 1 0.14 0.08
 9 0 -1 0.01 0.06
 9 0 -1 0.18 0.04
 -9 0 1 0.25 0.05
 9 0 -1 0.13 0.07
 -9 0 1 0.11 0.04
 -9 0 1 0.1 0.09
 9 0 -1 0.14 0.03
 -8 0 1 0.33 0.09
 -8 0 1 0.19 0.07
 -8 0 1 0.38 0.06
 8 0 -1 0.22 0.04
 -8 0 1 0.23 0.04
 -8 0 1 0.22 0.04
 8 0 -1 0.4 0.09
 8 0 -1 0.25 0.07
 8 0 -1 0.25 0.05
 -7 0 1 0.44 0.1
 7 0 -1 0.4 0.07
 7 0 -1 0.34 0.05
 -7 0 1 0.32 0.05
 7 0 -1 0.37 0.05
 -7 0 1 0.53 0.1
 -7 0 1 0.48 0.06
 -7 0 1 0.34 0.06
 7 0 -1 0.29 0.07
 -6 0 1 0.11 0.03
 6 0 -1 0.11 0.03
 -6 0 1 0.1 0.03
 -6 0 1 0.13 0.03
 6 0 -1 0.07 0.03
 6 0 -1 0.03 0.05
 -6 0 1 0.05 0.06
 6 0 -1 0.1 0.05
 -6 0 1 0.13 0.07
 -5 0 1 0.16 0.03
 5 0 -1 0.14 0.02
 -5 0 1 0.15 0.03
 5 0 -1 0.09 0.05
 5 0 -1 0.11 0.04
 -5 0 1 0.15 0.06
 -5 0 1 0.2 0.04
 4 0 -1 0.56 0.08
 -4 0 1 0.76 0.06
 -4 0 1 0.69 0.06
 4 0 -1 0.72 0.09
 4 0 -1 0.56 0.06
 -4 0 1 0.71 0.09
 -4 0 1 0.74 0.09
 -3 0 1 -0.02 0.04
 3 0 -1 -0.01 0.02
 3 0 -1 -0.07 0.05
 3 0 -1 0 0.02
 3 0 -1 -0.11 0.05
 -3 0 1 0.03 0.02
 -3 0 1 0.03 0.04
 2 0 1 0.11 0.02
 2 0 1 0.16 0.04
 -2 0 -1 0.09 0.04
 2 0 1 0.09 0.02
 -2 0 -1 0.11 0.03
 -2 0 -1 0.13 0.03
 2 0 1 0.07 0.02
 -2 0 -1 0.09 0.02
 2 0 1 0.1 0.02
 2 0 1 0.08 0.02
 -2 0 -1 0.1 0.03
 -3 0 -1 0.07 0.06
 3 0 1 0.06 0.07
 -3 0 -1 0.08 0.04
 -3 0 -1 0.07 0.04
 3 0 1 0.06 0.04
 3 0 1 0.06 0.02
 3 0 1 0.01 0.04
 -3 0 -1 0.03 0.03
 -3 0 -1 0.03 0.03
 -3 0 -1 0.02 0.04
 3 0 1 0.07 0.03
 3 0 1 0.14 0.03
 3 0 1 0.11 0.04
 4 0 1 -0.1 0.03
 -4 0 -1 0.01 0.03
 4 0 1 -0.05 0.03
 -4 0 -1 -0.04 0.03
 4 0 1 0 0.03
 4 0 1 0.01 0.05
 -4 0 -1 -0.06 0.03
 4 0 1 -0.08 0.04
 -4 0 -1 -0.03 0.03
 4 0 1 0.02 0.02
 -4 0 -1 -0.08 0.04
 5 0 1 -0.03 0.03
 -5 0 -1 0 0.03
 5 0 1 0.01 0.02
 5 0 1 -0.04 0.03
 5 0 1 -0.02 0.03
 -5 0 -1 -0.06 0.03
 5 0 1 0.05 0.06
 5 0 1 0 0.04
 -5 0 -1 -0.02 0.03
 -5 0 -1 0.01 0.04
 5 0 1 -0.02 0.03
 -5 0 -1 0.01 0.06
 6 0 1 0.1 0.03
 6 0 1 0.05 0.04
 6 0 1 0.05 0.03
 6 0 1 0.05 0.03
 -6 0 -1 0.07 0.07
 6 0 1 0.07 0.04
 6 0 1 0.09 0.05
 -6 0 -1 0.06 0.03
 -6 0 -1 -0.03 0.03
 -6 0 -1 -0.02 0.04
 -6 0 -1 0.07 0.06
 -6 0 -1 0.06 0.04
 6 0 1 -0.01 0.07
 7 0 1 0.1 0.04
 -7 0 -1 0.09 0.05
 7 0 1 0.1 0.07
 7 0 1 0.1 0.06
 -7 0 -1 0.08 0.04
 7 0 1 0.08 0.04
 -7 0 -1 0.06 0.04
 7 0 1 0.08 0.04
 7 0 1 0.02 0.04
 7 0 1 0.06 0.04
 -7 0 -1 0.09 0.09
 -7 0 -1 0.1 0.07
 -7 0 -1 0.08 0.05
 7 0 1 0.03 0.03
 8 0 1 0.02 0.03
 8 0 1 -0.02 0.05
 -8 0 -1 0.06 0.08
 8 0 1 0 0.07
 -8 0 -1 0.12 0.04
 -8 0 -1 -0.05 0.07
 8 0 1 -0.03 0.04
 8 0 1 -0.03 0.06
 -8 0 -1 -0.03 0.04
 8 0 1 -0.02 0.04
 -8 0 -1 0.04 0.05
 -8 0 -1 0.1 0.05
 8 0 1 0 0.04
 8 0 1 -0.07 0.04
 9 0 1 0.01 0.05
 -9 0 -1 0.03 0.05
 9 0 1 0.04 0.04
 9 0 1 0.01 0.03
 -9 0 -1 0.01 0.06
 -9 0 -1 0.01 0.09
 -9 0 -1 0.04 0.08
 9 0 1 -0.1 0.08
 9 0 1 0 0.05
 9 0 1 0.05 0.04
 -9 0 -1 -0.01 0.05
 9 0 1 0.06 0.04
 9 0 1 0.18 0.07
 -9 0 -1 0.15 0.04
 10 0 1 0.01 0.08
 -10 0 -1 -0.13 0.1
 10 0 1 -0.01 0.03
 -10 0 -1 -0.02 0.05
 -10 0 -1 -0.06 0.08
 -10 0 -1 0.01 0.06
 10 0 1 -0.01 0.04
 10 0 1 -0.09 0.05
 10 0 1 -0.06 0.03
 -10 0 -1 0.01 0.06
 -10 0 -1 -0.02 0.06
 10 0 1 -0.08 0.05
 -11 0 -1 -0.04 0.1
 11 0 1 0.02 0.06
 -11 0 -1 0.01 0.09
 11 0 1 0.07 0.06
 -11 0 -1 0 0.07
 11 0 1 -0.04 0.1
 11 0 1 -0.03 0.05
 -11 0 -1 -0.02 0.07
 -12 0 -1 -0.05 0.09
 -12 0 -1 0 0.08
 12 0 1 -0.02 0.06
 12 0 1 0.16 0.07
 -12 0 -1 0.14 0.12
 -12 0 -1 -0.07 0.09
 -13 0 -1 0.02 0.1
 13 0 1 0.08 0.08
 -13 0 -1 0.06 0.1
 13 0 1 0.01 0.06
 -13 0 -1 0.13 0.13
 -13 0 -1 0.17 0.14
 -14 0 -1 0.15 0.16
 14 0 1 0.11 0.08
 -15 0 -1 0.27 0.17
 15 0 1 0.17 0.07
 15 0 1 0.13 0.06
 -16 -1 1 0.18 0.2
 -14 -1 1 -0.01 0.1
 14 -1 -1 0.08 0.04
 -14 -1 1 0.03 0.08
 -14 -1 1 0.2 0.16
 14 -1 -1 0.2 0.05
 -14 1 1 0.04 0.09
 14 1 -1 0.19 0.11
 -14 1 1 0.23 0.1
 -14 1 1 0.27 0.16
 13 -1 -1 0.86 0.1
 -13 -1 1 1.18 0.2
 -13 1 1 0.75 0.14
 -13 1 1 0.83 0.17
 -13 1 1 1.17 0.2
 12 -1 -1 0.3 0.09
 12 -1 -1 0.32 0.07
 -12 -1 1 0.25 0.13
 12 -1 -1 0.14 0.09
 -12 -1 1 0.26 0.12
 12 -1 -1 0.41 0.08
 -12 -1 1 0.27 0.08
 -12 1 1 0.25 0.08
 12 1 -1 0.28 0.14
 -12 1 1 0.47 0.13
 12 1 -1 0.26 0.09
 -12 1 1 0.29 0.08
 12 1 -1 0.25 0.09
 11 -1 -1 -0.01 0.07
 11 -1 -1 -0.02 0.07
 11 -1 -1 0.04 0.09
 11 -1 -1 0.01 0.04
 -11 -1 1 0.09 0.05
 -11 -1 1 0.06 0.06
 11 -1 -1 -0.01 0.05
 -11 -1 1 -0.05 0.11
 -11 -1 1 0.03 0.1
 -11 1 1 -0.04 0.06
 11 1 -1 0.04 0.03
 11 1 -1 0.04 0.07
 -11 1 1 -0.03 0.06
 11 1 -1 0.2 0.09
 11 1 -1 0 0.03
 -11 1 1 0.1 0.1
 11 1 -1 -0.07 0.07
 10 -1 -1 0.19 0.08
 -10 -1 1 0.07 0.09
 10 -1 -1 0.05 0.04
 -10 -1 1 0.15 0.04
 -10 -1 1 0.18 0.05
 -10 -1 1 0.09 0.05
 10 -1 -1 0.03 0.07
 10 -1 -1 -0.07 0.06
 10 -1 -1 0.03 0.04
 -10 -1 1 0.02 0.08
 -10 1 1 0.06 0.07
 -10 1 1 0.02 0.04
 10 1 -1 0.06 0.06
 10 1 -1 0.05 0.03
 10 1 -1 0.02 0.08
 10 1 -1 0.16 0.07
 10 1 -1 0.11 0.03
 -10 1 1 0.05 0.05
 9 -1 -1 0 0.07
 -9 -1 1 0.09 0.08
 -9 -1 1 0.08 0.08
 -9 -1 1 0.06 0.04
 -9 -1 1 0.06 0.04
 9 -1 -1 0.04 0.05
 9 -1 -1 0.08 0.06
 -9 -1 1 0.12 0.04
 9 -1 -1 0.1 0.04
 -9 1 1 0.17 0.04
 -9 1 1 0.14 0.04
 -9 1 1 0.1 0.08
 9 1 -1 -0.01 0.07
 -9 1 1 0.07 0.07
 9 1 -1 0.12 0.03
 9 1 -1 0.09 0.06
 9 1 -1 0.14 0.03
 -9 1 1 0.14 0.05
 -8 -1 1 5.1 0.36
 -8 -1 1 5.39 0.32
 -8 -1 1 5.4 0.37
 8 -1 -1 5.96 0.32
 8 -1 -1 5.49 0.36
 8 1 -1 5.17 0.36
 8 1 -1 5.16 0.36
 -8 1 1 5.79 0.35
 8 1 -1 5.2 0.35
 -8 1 1 5.85 0.36
 7 -1 -1 6.23 0.43
 -7 -1 1 7.26 0.44
 -7 -1 1 7.13 0.4
 7 -1 -1 6.9 0.4
 7 -1 -1 6.4 0.42
 -7 -1 1 7.17 0.44
 -7 -1 1 7.27 0.4
 7 -1 -1 6.5 0.43
 7 -1 -1 6.54 0.43
 -7 -1 1 6.45 0.43
 7 -1 -1 6.94 0.44
 7 -1 -1 6.62 0.4
 -7 1 1 6.75 0.44
 -7 1 1 6.88 0.44
 7 1 -1 7.17 0.43
 -7 1 1 6.56 0.4
 7 1 -1 7.06 0.4
 -7 1 1 6.98 0.43
 7 1 -1 6.93 0.43
 7 1 -1 7.06 0.4
 -7 1 1 6.74 0.4
 6 -1 -1 1.65 0.11
 -6 -1 1 1.46 0.1
 -6 -1 1 1.58 0.14
 6 -1 -1 1.75 0.13
 6 -1 -1 1.78 0.12
 6 -1 -1 1.69 0.1
 6 -1 -1 1.65 0.1
 -6 -1 1 1.42 0.13
 6 -1 -1 1.62 0.11
 6 1 -1 1.45 0.1
 -6 1 1 1.71 0.1
 6 1 -1 1.41 0.12
 6 1 -1 1.45 0.12
 6 1 -1 1.43 0.1
 -6 1 1 1.67 0.13
 -6 1 1 1.79 0.13
 -5 -1 1 0.44 0.04
 5 -1 -1 0.26 0.04
 -5 -1 1 0.31 0.04
 5 -1 -1 0.36 0.04
 -5 -1 1 0.42 0.04
 -5 -1 1 0.39 0.04
 5 -1 -1 0.26 0.06
 5 -1 -1 0.33 0.04
 -5 -1 1 0.32 0.07
 -5 -1 1 0.38 0.07
 5 -1 -1 0.27 0.06
 -5 1 1 0.34 0.04
 5 1 -1 0.37 0.03
 5 1 -1 0.39 0.03
 -5 1 1 0.37 0.05
 5 1 -1 0.36 0.06
 -5 1 1 0.34 0.05
 5 1 -1 0.35 0.06
 -5 1 1 0.33 0.06
 -4 -1 1 77.49 4.78
 4 -1 -1 79.59 4.48
 4 -1 -1 77.82 4.86
 4 -1 -1 79.59 4.78
 -4 -1 1 76.85 4.71
 4 -1 -1 78.8 4.48
 -4 -1 1 79.87 4.48
 -4 -1 1 76.42 4.86
 4 -1 -1 80.09 4.86
 4 -1 -1 76.81 4.71
 -4 -1 1 80.29 4.86
 -4 -1 1 77.83 4.48
 4 1 -1 78.06 4.48
 4 1 -1 77.47 4.78
 4 1 -1 79.16 4.71
 -4 1 1 79.52 4.86
 -4 1 1 79.24 4.48
 4 1 -1 75.15 4.48
 -4 1 1 77.33 4.71
 -4 1 1 79.51 4.78
 -3 -1 1 33.6 1.97
 3 -1 -1 32.98 1.97
 3 -1 -1 33.05 2.03
 3 -1 -1 31.89 2.03
 -3 -1 1 32.95 2
 -3 -1 1 32.92 1.87
 3 -1 -1 32.06 1.87
 3 -1 -1 32.5 2
 3 -1 -1 31.78 1.87
 3 1 -1 32.71 1.97
 -3 1 1 33.67 1.87
 -3 1 1 32.78 2.03
 3 1 -1 33.02 2
 -3 1 1 31.93 2
 -3 1 1 32.61 1.87
 2 -1 1 0.06 0.04
 2 -1 1 0.09 0.03
 -2 -1 -1 0.07 0.02
 2 -1 1 0.05 0.03
 -2 -1 -1 0.12 0.02
 -2 -1 -1 0.12 0.02
 2 -1 1 0.03 0.03
 -2 -1 -1 0.07 0.02
 -2 -1 -1 0.09 0.04
 2 -1 1 0.05 0.02
 2 1 1 0.12 0.02
 2 1 1 0.08 0.01
 2 1 1 0.07 0.02
 2 1 1 0.11 0.04
 2 1 1 0.12 0.02
 -2 1 -1 0.07 0.03
 -2 1 -1 0.05 0.03
 -2 1 -1 0.07 0.03
 -2 1 -1 0.07 0.04
 -2 1 -1 0.08 0.03
 2 1 1 0.13 0.02
 2 1 1 0.11 0.02
 -3 -1 -1 1.14 0.11
 -3 -1 -1 1.31 0.09
 3 -1 1 1.17 0.1
 -3 -1 -1 1.3 0.09
 3 -1 1 1.23 0.09
 3 -1 1 1.17 0.08
 -3 -1 -1 1.25 0.1
 3 -1 1 1.16 0.1
 3 -1 1 1.19 0.11
 3 -1 1 1.27 0.09
 -3 -1 -1 1.41 0.1
 3 1 1 1.35 0.08
 3 1 1 1.25 0.09
 -3 1 -1 1.25 0.12
 -3 1 -1 1.25 0.1
 3 1 1 1.28 0.11
 3 1 1 1.27 0.1
 -3 1 -1 1.22 0.1
 3 1 1 1.28 0.09
 3 1 1 1.26 0.09
 -3 1 -1 1.15 0.1
 3 1 1 1.3 0.1
 -3 1 -1 1.28 0.1
 4 -1 1 13.1 0.82
 4 -1 1 12.83 0.83
 -4 -1 -1 13.38 0.77
 -4 -1 -1 13.65 0.82
 -4 -1 -1 13.59 0.77
 -4 -1 -1 13.3 0.83
 4 -1 1 13.28 0.84
 4 -1 1 13.69 0.81
 4 -1 1 12.97 0.82
 -4 1 -1 13.38 0.84
 -4 1 -1 13.4 0.77
 -4 1 -1 13.55 0.82
 4 1 1 12.88 0.83
 -4 1 -1 13.41 0.84
 -4 1 -1 12.98 0.77
 4 1 1 13.6 0.82
 4 1 1 13.47 0.83
 4 1 1 13.6 0.81
 4 1 1 13.55 0.82
 -5 -1 -1 6.88 0.41
 5 -1 1 6.12 0.38
 5 -1 1 6.1 0.41
 -5 -1 -1 6.61 0.38
 5 -1 1 6.3 0.41
 5 -1 1 6.26 0.41
 -5 -1 -1 6.5 0.38
 -5 -1 -1 6.91 0.41
 5 -1 1 6.52 0.38
 5 -1 1 6.22 0.39
 -5 1 -1 6.38 0.41
 5 1 1 6.63 0.41
 5 1 1 6.74 0.41
 -5 1 -1 6.4 0.38
 -5 1 -1 6.43 0.41
 -5 1 -1 6.26 0.41
 5 1 1 6.6 0.38
 5 1 1 6.72 0.39
 5 1 1 6.45 0.41
 -5 1 -1 6.38 0.41
 5 1 1 6.35 0.41
 -5 1 -1 6.23 0.38
 6 -1 1 1.27 0.1
 6 -1 1 1.18 0.1
 -6 -1 -1 1.02 0.09
 6 -1 1 1.19 0.08
 -6 -1 -1 1.03 0.09
 6 -1 1 1.11 0.09
 6 -1 1 1.21 0.09
 -6 -1 -1 0.95 0.09
 6 -1 1 1.05 0.12
 -6 -1 -1 1.05 0.09
 -6 -1 -1 1.06 0.12
 6 -1 1 1.19 0.1
 -6 1 -1 1.38 0.11
 -6 1 -1 1.23 0.12
 6 1 1 1.1 0.09
 6 1 1 1.14 0.11
 6 1 1 0.94 0.09
 -6 1 -1 1.16 0.1
 6 1 1 1.01 0.08
 6 1 1 1.11 0.09
 -6 1 -1 1.24 0.09
 -6 1 -1 1.21 0.1
 6 1 1 1.01 0.09
 6 1 1 1.12 0.1
 -7 -1 -1 12.81 0.82
 -7 -1 -1 13.41 0.81
 -7 -1 -1 12.91 0.82
 7 -1 1 13.08 0.76
 7 -1 1 13.48 0.82
 7 -1 1 13.32 0.76
 7 -1 1 13.02 0.79
 -7 -1 -1 13.14 0.76
 -7 -1 -1 13.2 0.81
 -7 -1 -1 12.86 0.76
 7 -1 1 12.49 0.82
 7 -1 1 13.25 0.81
 7 -1 1 13.09 0.82
 -7 1 -1 13.44 0.82
 -7 1 -1 13.89 0.81
 7 1 1 12.85 0.76
 7 1 1 13.41 0.76
 -7 1 -1 12.74 0.76
 7 1 1 12.83 0.79
 -7 1 -1 13.15 0.76
 -7 1 -1 13.3 0.82
 -7 1 -1 13.77 0.82
 7 1 1 12.62 0.82
 7 1 1 12.84 0.81
 7 1 1 12.8 0.81
 8 -1 1 5.45 0.36
 8 -1 1 5.06 0.34
 -8 -1 -1 5.35 0.33
 -8 -1 -1 5.38 0.32
 8 -1 1 5.33 0.35
 8 -1 1 5.09 0.34
 -8 -1 -1 5.55 0.35
 8 -1 1 5.56 0.33
 8 -1 1 5.33 0.35
 -8 -1 -1 5.65 0.37
 -8 -1 -1 5.59 0.36
 8 -1 1 5.26 0.32
 -8 -1 -1 5.5 0.35
 8 -1 1 5.43 0.35
 8 1 1 5.3 0.36
 8 1 1 5.37 0.34
 8 1 1 5.43 0.34
 -8 1 -1 5.44 0.35
 -8 1 -1 5.19 0.33
 8 1 1 5.61 0.34
 -8 1 -1 5.55 0.36
 -8 1 -1 5.36 0.36
 8 1 1 5.25 0.34
 8 1 1 5.69 0.35
 8 1 1 5.47 0.32
 -8 1 -1 5.22 0.32
 8 1 1 5.86 0.32
 -8 1 -1 5.23 0.36
 -9 -1 -1 0.26 0.08
 9 -1 1 0.3 0.07
 9 -1 1 0.48 0.11
 -9 -1 -1 0.21 0.04
 -9 -1 -1 0.24 0.06
 9 -1 1 0.21 0.05
 9 -1 1 0.14 0.05
 9 -1 1 0.22 0.06
 9 -1 1 0.22 0.04
 -9 -1 -1 0.17 0.1
 9 -1 1 0.21 0.05
 -9 -1 -1 0.15 0.05
 9 -1 1 0.22 0.05
 -9 -1 -1 0.2 0.06
 -9 1 -1 0.2 0.06
 9 1 1 0.21 0.05
 -9 1 -1 0.15 0.09
 -9 1 -1 0.17 0.05
 9 1 1 0.16 0.08
 9 1 1 0.19 0.03
 9 1 1 0.28 0.05
 9 1 1 0.13 0.05
 9 1 1 0.2 0.08
 -9 1 -1 0.22 0.08
 -9 1 -1 0.2 0.05
 9 1 1 0.25 0.05
 -9 1 -1 0.19 0.06
 10 -1 1 0.23 0.05
 -10 -1 -1 0.3 0.07
 10 -1 1 0.16 0.06
 -10 -1 -1 0.28 0.1
 10 -1 1 0.17 0.06
 10 -1 1 0.18 0.07
 10 -1 1 0.2 0.05
 -10 -1 -1 0.31 0.05
 10 -1 1 0.18 0.04
 -10 -1 -1 0.38 0.09
 -10 -1 -1 0.27 0.07
 10 1 1 0.32 0.05
 -10 1 -1 0.29 0.1
 10 1 1 0.31 0.06
 -10 1 -1 0.22 0.07
 10 1 1 0.23 0.06
 -10 1 -1 0.3 0.1
 10 1 1 0.24 0.09
 -10 1 -1 0.13 0.07
 10 1 1 0.24 0.06
 -10 1 -1 0.12 0.07
 11 -1 1 0.28 0.04
 -11 -1 -1 0.29 0.12
 -11 -1 -1 0.21 0.07
 11 -1 1 0.37 0.07
 -11 -1 -1 0.31 0.1
 -11 -1 -1 0.25 0.08
 11 -1 1 0.27 0.06
 11 -1 1 0.32 0.06
 11 -1 1 0.27 0.07
 -11 -1 -1 0.29 0.08
 -11 1 -1 0.38 0.1
 -11 1 -1 0.28 0.08
 11 1 1 0.3 0.06
 -11 1 -1 0.36 0.08
 11 1 1 0.31 0.12
 -11 1 -1 0.18 0.11
 11 1 1 0.27 0.06
 11 1 1 0.26 0.05
 -12 -1 -1 0.59 0.15
 12 -1 1 0.83 0.1
 12 -1 1 0.98 0.12
 -12 -1 -1 0.8 0.16
 -12 -1 -1 0.84 0.17
 -12 -1 -1 0.64 0.13
 -12 1 -1 1 0.16
 -12 1 -1 1.09 0.16
 -12 1 -1 0.76 0.16
 12 1 1 0.93 0.18
 -12 1 -1 0.82 0.14
 12 1 1 0.63 0.09
 12 1 1 0.79 0.11
 -13 -1 -1 0.08 0.09
 13 -1 1 0.12 0.06
 -13 -1 -1 0.32 0.15
 13 -1 1 0.23 0.08
 13 -1 1 0.3 0.09
 -13 -1 -1 0.15 0.1
 -13 -1 -1 0.2 0.15
 13 1 1 0.19 0.06
 13 1 1 0.16 0.07
 -13 1 -1 0.28 0.13
 13 1 1 0.28 0.07
 -13 1 -1 0.06 0.11
 14 -1 1 0.49 0.1
 -14 -1 -1 0.49 0.17
 14 -1 1 0.59 0.13
 -14 -1 -1 0.53 0.15
 14 1 1 0.62 0.1
 15 -1 1 0.15 0.08
 15 -1 1 0.07 0.06
 15 -2 -1 0.62 0.09
 -14 -2 1 0.38 0.1
 14 -2 -1 0.45 0.08
 14 -2 -1 0.62 0.11
 -14 -2 1 0.34 0.08
 -14 -2 1 0.49 0.16
 -14 2 1 0.76 0.18
 -14 2 1 0.27 0.11
 -14 2 1 0.78 0.17
 13 -2 -1 0.01 0.05
 -13 -2 1 -0.03 0.07
 -13 -2 1 -0.1 0.08
 -13 -2 1 0.31 0.14
 13 -2 -1 0.11 0.11
 13 -2 -1 -0.18 0.1
 13 -2 -1 0.12 0.06
 -13 2 1 0 0.09
 -13 2 1 0.07 0.1
 13 2 -1 -0.2 0.09
 -13 2 1 -0.03 0.11
 13 2 -1 0.09 0.1
 -13 2 1 0.05 0.09
 12 -2 -1 1.69 0.14
 -12 -2 1 1.86 0.2
 12 -2 -1 1.69 0.13
 12 -2 -1 1.36 0.18
 12 -2 -1 1.64 0.19
 -12 -2 1 1.78 0.16
 -12 -2 1 2.1 0.2
 12 2 -1 1.92 0.18
 -12 2 1 1.36 0.17
 -12 2 1 1.61 0.18
 12 2 -1 1.7 0.18
 12 2 -1 2.02 0.2
 -12 2 1 1.77 0.18
 11 -2 -1 0.63 0.08
 -11 -2 1 0.59 0.08
 -11 -2 1 0.69 0.15
 -11 -2 1 0.67 0.13
 11 -2 -1 0.61 0.09
 11 -2 -1 0.87 0.12
 -11 -2 1 0.71 0.1
 11 -2 -1 0.52 0.12
 11 2 -1 0.67 0.12
 -11 2 1 0.72 0.12
 11 2 -1 0.82 0.14
 -11 2 1 0.5 0.12
 -11 2 1 0.75 0.12
 -10 -2 1 0.09 0.04
 -10 -2 1 0.07 0.04
 10 -2 -1 -0.07 0.07
 -10 -2 1 0 0.09
 10 -2 -1 0.19 0.08
 -10 -2 1 0.07 0.05
 -10 -2 1 -0.15 0.08
 10 -2 -1 0.03 0.04
 10 -2 -1 0 0.06
 10 2 -1 0.05 0.07
 -10 2 1 -0.04 0.05
 -10 2 1 0.03 0.04
 10 2 -1 0.01 0.07
 -10 2 1 0.05 0.08
 10 2 -1 0 0.06
 -10 2 1 0 0.06
 9 -2 -1 2.97 0.18
 -9 -2 1 2.67 0.19
 -9 -2 1 2.86 0.18
 9 -2 -1 2.82 0.18
 9 -2 -1 2.7 0.2
 9 -2 -1 2.92 0.19
 -9 -2 1 2.97 0.22
 -9 -2 1 2.82 0.17
 -9 -2 1 2.89 0.22
 9 -2 -1 2.93 0.21
 9 -2 -1 2.42 0.21
 -9 -2 1 2.66 0.19
 -9 2 1 2.96 0.2
 -9 2 1 2.78 0.2
 -9 2 1 2.79 0.21
 -9 2 1 2.95 0.18
 -9 2 1 3.08 0.19
 9 2 -1 2.66 0.21
 9 2 -1 2.73 0.21
 -8 -2 1 8.35 0.56
 8 -2 -1 9.16 0.52
 8 -2 -1 9.28 0.56
 8 -2 -1 9.17 0.56
 -8 -2 1 8.9 0.57
 8 -2 -1 9.31 0.57
 -8 -2 1 8.33 0.56
 -8 -2 1 8.81 0.57
 -8 2 1 9.25 0.57
 8 2 -1 8.3 0.56
 -8 2 1 9.06 0.57
 8 2 -1 8.41 0.57
 -8 2 1 9.39 0.52
 -8 2 1 9.18 0.57
 7 -2 -1 1.15 0.11
 -7 -2 1 0.9 0.07
 7 -2 -1 0.87 0.11
 -7 -2 1 0.83 0.07
 7 -2 -1 1.04 0.1
 -7 -2 1 1.01 0.13
 7 -2 -1 1.06 0.08
 -7 -2 1 0.94 0.12
 7 -2 -1 0.9 0.08
 7 -2 -1 0.99 0.08
 -7 -2 1 1.02 0.08
 -7 2 1 0.91 0.09
 7 2 -1 0.9 0.06
 -7 2 1 1.12 0.09
 -7 2 1 1.19 0.09
 -7 2 1 1.11 0.11
 7 2 -1 0.78 0.1
 7 2 -1 0.78 0.1
 7 2 -1 0.87 0.1
 -7 2 1 1.12 0.08
 -6 -2 1 13.43 0.84
 6 -2 -1 13.73 0.82
 -6 -2 1 12.79 0.77
 6 -2 -1 13.73 0.84
 6 -2 -1 13.45 0.83
 -6 -2 1 13.86 0.77
 -6 -2 1 12.71 0.84
 6 -2 -1 14.02 0.78
 -6 -2 1 13.47 0.84
 6 -2 -1 13.52 0.84
 6 -2 -1 13.68 0.84
 -6 -2 1 13.75 0.83
 6 -2 -1 13.9 0.78
 -6 2 1 12.86 0.84
 -6 2 1 14.04 0.78
 -6 2 1 14.02 0.84
 6 2 -1 12.95 0.84
 6 2 -1 13.06 0.82
 -6 2 1 14.03 0.78
 6 2 -1 12.69 0.83
 -6 2 1 13.72 0.85
 -5 -2 1 2.95 0.18
 5 -2 -1 2.79 0.17
 5 -2 -1 2.77 0.17
 5 -2 -1 2.83 0.19
 5 -2 -1 2.9 0.19
 5 -2 -1 2.59 0.19
 -5 -2 1 2.92 0.2
 5 -2 -1 2.77 0.19
 5 -2 -1 2.8 0.19
 -5 -2 1 3.01 0.19
 5 2 -1 3.08 0.19
 -5 2 1 2.76 0.17
 -5 2 1 2.63 0.17
 5 2 -1 2.82 0.19
 5 2 -1 2.91 0.19
 -5 2 1 2.87 0.19
 4 -2 -1 666.98 38.8
 4 -2 -1 633.52 39.46
 4 -2 -1 620.53 36.39
 -4 -2 1 637.5 38.25
 4 -2 -1 641.92 36.39
 -4 -2 1 638.88 38.79
 4 -2 -1 628.59 38.27
 4 -2 -1 637.46 39.46
 -4 2 1 656.42 38.8
 4 2 -1 632.76 38.79
 4 2 -1 645.16 38.23
 -4 2 1 616.35 36.4
 4 2 -1 607.75 38.27
 -4 2 1 645.19 39.47
 -3 -2 1 0.17 0.05
 3 -2 -1 0.12 0.04
 3 -2 -1 0.08 0.05
 3 -2 -1 0.11 0.03
 3 -2 -1 0.13 0.03
 3 -2 -1 0.11 0.03
 -3 -2 1 0.11 0.05
 3 2 -1 0.16 0.04
 3 2 -1 0.07 0.04
 -3 2 1 0.11 0.03
 -3 2 1 0.12 0.06
 -3 2 1 0.22 0.05
 3 2 -1 0.16 0.05
 2 -2 1 5.68 0.35
 -2 -2 -1 5.33 0.33
 2 -2 1 5.62 0.32
 -2 -2 -1 5.35 0.34
 -2 -2 -1 5.11 0.34
 2 -2 1 5.23 0.32
 2 -2 1 5.5 0.35
 -2 -2 -1 5.24 0.34
 -2 -2 -1 5.28 0.32
 2 -2 1 5.72 0.34
 -2 2 -1 5.51 0.34
 2 2 1 5.26 0.34
 2 2 1 5.46 0.32
 -2 2 -1 5.36 0.35
 -2 2 -1 5.59 0.33
 2 2 1 5.37 0.34
 2 2 1 5.34 0.34
 2 2 1 5.41 0.33
 2 2 1 5.49 0.34
 -2 2 -1 5.68 0.35
 3 -2 1 0.63 0.06
 -3 -2 -1 0.77 0.07
 3 -2 1 0.57 0.08
 -3 -2 -1 0.71 0.06
 -3 -2 -1 0.75 0.07
 -3 -2 -1 0.84 0.07
 3 -2 1 0.58 0.07
 3 -2 1 0.58 0.09
 -3 -2 -1 0.84 0.07
 3 -2 1 0.52 0.08
 3 -2 1 0.61 0.08
 -3 -2 -1 0.67 0.09
 -3 2 -1 0.63 0.08
 3 2 1 0.7 0.06
 3 2 1 0.75 0.07
 -3 2 -1 0.57 0.08
 3 2 1 0.85 0.07
 3 2 1 0.78 0.09
 3 2 1 0.73 0.07
 -3 2 -1 0.68 0.08
 -3 2 -1 0.63 0.08
 -3 2 -1 0.67 0.06
 3 2 1 0.73 0.06
 3 2 1 0.72 0.06
 -3 2 -1 0.67 0.09
 -4 -2 -1 69.38 3.94
 4 -2 1 69.08 4.14
 4 -2 1 67.71 4.27
 -4 -2 -1 70.01 4.27
 -4 -2 -1 68.28 4.2
 -4 -2 -1 67.29 3.94
 4 -2 1 68.32 3.94
 4 -2 1 68.41 4.27
 4 -2 1 68.19 4.14
 4 2 1 71.5 4.27
 4 2 1 67.44 4.14
 -4 2 -1 69.47 4.27
 4 2 1 67.7 3.94
 4 2 1 70.75 4.2
 4 2 1 69.02 4.14
 -4 2 -1 67.74 3.94
 -4 2 -1 68.97 4.2
 4 2 1 68.98 4.27
 5 -2 1 0.14 0.04
 -5 -2 -1 0.14 0.04
 5 -2 1 0.18 0.04
 5 -2 1 0.13 0.04
 -5 -2 -1 0.09 0.06
 5 -2 1 0.12 0.02
 -5 -2 -1 0.09 0.03
 5 -2 1 0.07 0.06
 -5 -2 -1 0.09 0.03
 5 2 1 0.07 0.03
 -5 2 -1 0.12 0.05
 5 2 1 0.11 0.03
 5 2 1 0.09 0.06
 -5 2 -1 0.11 0.04
 5 2 1 0.09 0.04
 -5 2 -1 0.1 0.03
 5 2 1 0.09 0.03
 -5 2 -1 0.12 0.04
 -5 2 -1 0.16 0.04
 5 2 1 0.11 0.03
 -5 2 -1 0.1 0.06
 5 2 1 0.08 0.02
 -6 -2 -1 0.3 0.05
 -6 -2 -1 0.34 0.08
 6 -2 1 0.39 0.07
 6 -2 1 0.44 0.08
 6 -2 1 0.29 0.05
 6 -2 1 0.31 0.05
 -6 -2 -1 0.26 0.06
 6 -2 1 0.41 0.07
 -6 -2 -1 0.25 0.06
 6 -2 1 0.34 0.07
 -6 2 -1 0.4 0.07
 6 2 1 0.36 0.05
 6 2 1 0.24 0.05
 6 2 1 0.28 0.04
 -6 2 -1 0.47 0.08
 6 2 1 0.26 0.06
 -6 2 -1 0.32 0.05
 6 2 1 0.24 0.05
 -6 2 -1 0.4 0.08
 -6 2 -1 0.27 0.05
 6 2 1 0.37 0.07
 6 2 1 0.39 0.05
 -6 2 -1 0.39 0.08
 -7 -2 -1 0.11 0.04
 -7 -2 -1 0.12 0.04
 7 -2 1 0.18 0.05
 7 -2 1 0.18 0.05
 -7 -2 -1 0.19 0.07
 -7 -2 -1 0.1 0.04
 7 -2 1 0.15 0.05
 7 -2 1 0.17 0.04
 -7 -2 -1 0.24 0.09
 7 -2 1 0.21 0.05
 -7 -2 -1 0.16 0.04
 7 -2 1 0.13 0.08
 -7 2 -1 0.09 0.05
 7 2 1 0.08 0.08
 7 2 1 0.19 0.04
 7 2 1 0.13 0.03
 7 2 1 0.22 0.06
 -7 2 -1 0.24 0.08
 -7 2 -1 0.17 0.04
 7 2 1 0.13 0.04
 -7 2 -1 0.43 0.09
 7 2 1 0.13 0.04
 -7 2 -1 0.21 0.05
 -7 2 -1 0.25 0.05
 7 2 1 0.15 0.04
 -8 -2 -1 6.87 0.42
 8 -2 1 6.19 0.42
 -8 -2 -1 6.99 0.43
 -8 -2 -1 6.73 0.39
 8 -2 1 6.16 0.39
 -8 -2 -1 6.86 0.39
 -8 -2 -1 6.91 0.42
 8 -2 1 5.84 0.43
 8 2 1 7.03 0.42
 -8 2 -1 6.14 0.43
 8 2 1 6.75 0.41
 -8 2 -1 5.9 0.43
 -8 2 -1 6.09 0.39
 8 2 1 7 0.43
 -8 2 -1 6.13 0.42
 8 2 1 6.93 0.39
 -9 -2 -1 0.06 0.05
 9 -2 1 0.05 0.06
 -9 -2 -1 0.05 0.09
 9 -2 1 0.01 0.04
 9 -2 1 0.04 0.05
 -9 -2 -1 0.06 0.08
 9 -2 1 0.11 0.05
 -9 -2 -1 0.06 0.05
 9 -2 1 0.06 0.05
 9 -2 1 0 0.08
 -9 -2 -1 0.09 0.05
 -9 -2 -1 0.14 0.04
 -9 2 -1 0.06 0.05
 9 2 1 -0.02 0.08
 -9 2 -1 0.08 0.04
 -9 2 -1 0.13 0.08
 -9 2 -1 0.06 0.09
 9 2 1 0.08 0.08
 9 2 1 0.02 0.04
 -9 2 -1 0.12 0.06
 -9 2 -1 0 0.06
 9 2 1 0.06 0.05
 10 -2 1 0.18 0.06
 -10 -2 -1 0.25 0.06
 10 -2 1 0.22 0.05
 -10 -2 -1 0.26 0.1
 -10 -2 -1 0.23 0.05
 10 -2 1 0.32 0.07
 10 -2 1 0.27 0.06
 -10 -2 -1 0.18 0.06
 10 -2 1 0.21 0.06
 -10 -2 -1 0.26 0.06
 10 -2 1 0.19 0.05
 -10 -2 -1 0.19 0.1
 -10 2 -1 0.21 0.07
 10 2 1 0.21 0.06
 10 2 1 0.22 0.05
 10 2 1 0.14 0.09
 10 2 1 0.3 0.05
 10 2 1 0.16 0.05
 -10 2 -1 0.23 0.09
 -10 2 -1 0.18 0.07
 -10 2 -1 0.17 0.1
 -10 2 -1 0.24 0.07
 11 -2 1 0.22 0.05
 -11 -2 -1 0.3 0.11
 -11 -2 -1 0.27 0.11
 11 -2 1 0.22 0.06
 11 -2 1 0.24 0.06
 -11 -2 -1 0.32 0.08
 11 -2 1 0.2 0.05
 11 -2 1 0.19 0.07
 -11 -2 -1 0.18 0.07
 -11 -2 -1 0.21 0.07
 11 2 1 0.24 0.05
 -11 2 -1 0.22 0.08
 -11 2 -1 0.33 0.11
 -11 2 -1 0.23 0.09
 11 2 1 0.2 0.06
 11 2 1 0.21 0.11
 -11 2 -1 0.17 0.11
 -11 2 -1 0.26 0.08
 11 2 1 0.26 0.06
 -12 -2 -1 0.17 0.09
 12 -2 1 0.26 0.07
 -12 -2 -1 0.17 0.12
 12 -2 1 0.26 0.08
 -12 -2 -1 0.21 0.08
 -12 -2 -1 0.23 0.08
 12 2 1 0.21 0.14
 12 2 1 0.24 0.05
 12 2 1 0.18 0.07
 -12 2 -1 0.24 0.12
 12 2 1 0.2 0.06
 -13 -2 -1 0.53 0.11
 13 -2 1 0.57 0.13
 13 -2 1 0.69 0.12
 -13 -2 -1 1.02 0.18
 -13 -2 -1 0.67 0.14
 -13 -2 -1 0.83 0.18
 13 2 1 0.5 0.09
 -13 2 -1 0.46 0.12
 -13 2 -1 0.8 0.17
 13 2 1 0.5 0.08
 14 -2 1 0.28 0.09
 -14 -2 -1 0.5 0.16
 -14 -2 -1 -0.01 0.13
 14 -2 1 0.12 0.07
 14 2 1 0.18 0.04
 14 2 1 0.19 0.05
 -14 2 -1 0.35 0.15
 15 -2 1 0.16 0.07
 -15 -2 -1 0.07 0.16
 -15 -2 -1 -0.1 0.16
 -16 -3 1 0.4 0.19
 -16 3 1 0.24 0.21
 15 -3 -1 0.32 0.07
 -15 -3 1 0.39 0.18
 -15 -3 1 0.3 0.15
 -15 3 1 0.49 0.15
 14 -3 -1 1.29 0.13
 -14 -3 1 1.08 0.17
 -14 -3 1 0.93 0.12
 -14 -3 1 1.39 0.22
 -14 -3 1 1.67 0.22
 -14 3 1 1.35 0.21
 -14 3 1 1.03 0.17
 -14 3 1 1.12 0.19
 -13 -3 1 0.43 0.09
 13 -3 -1 0.53 0.08
 -13 -3 1 0.51 0.09
 13 -3 -1 0.56 0.09
 -13 -3 1 0.69 0.15
 -13 3 1 0.69 0.16
 -13 3 1 0.61 0.15
 -13 3 1 0.46 0.1
 13 3 -1 0.46 0.11
 12 -3 -1 0.53 0.08
 -12 -3 1 0.63 0.13
 -12 -3 1 0.62 0.11
 12 -3 -1 0.48 0.09
 -12 -3 1 0.47 0.13
 -12 3 1 0.46 0.09
 12 3 -1 0.45 0.12
 -12 3 1 0.67 0.16
 -12 3 1 0.5 0.1
 -11 -3 1 1.37 0.13
 11 -3 -1 1.39 0.16
 -11 -3 1 1.38 0.19
 11 -3 -1 1.47 0.16
 -11 -3 1 1.51 0.11
 11 -3 -1 1.57 0.13
 11 -3 -1 1.57 0.11
 -11 -3 1 1.51 0.17
 -11 -3 1 1.46 0.13
 11 -3 -1 1.52 0.12
 -11 3 1 1.59 0.17
 -11 3 1 1.58 0.16
 11 3 -1 1.26 0.17
 -11 3 1 1.41 0.15
 11 3 -1 1.55 0.16
 -10 -3 1 2.21 0.17
 10 -3 -1 2.55 0.17
 10 -3 -1 2.6 0.17
 -10 -3 1 2.29 0.21
 10 -3 -1 2.7 0.2
 10 -3 -1 2.47 0.19
 -10 -3 1 2.22 0.17
 10 -3 -1 2.47 0.2
 10 -3 -1 2.76 0.17
 -10 -3 1 2.32 0.15
 10 -3 -1 2.59 0.16
 -10 -3 1 2.36 0.16
 -10 -3 1 2.42 0.21
 10 3 -1 2.39 0.19
 -10 3 1 2.51 0.19
 10 3 -1 2.07 0.2
 -10 3 1 2.71 0.21
 -10 3 1 2.41 0.16
 -10 3 1 2.54 0.19
 9 -3 -1 1.68 0.15
 9 -3 -1 1.84 0.15
 -9 -3 1 1.51 0.16
 9 -3 -1 1.81 0.12
 -9 -3 1 1.67 0.17
 -9 -3 1 1.58 0.12
 -9 -3 1 1.58 0.11
 -9 -3 1 1.55 0.13
 9 -3 -1 1.85 0.13
 9 -3 -1 1.76 0.13
 -9 -3 1 1.59 0.11
 9 -3 -1 1.72 0.15
 9 -3 -1 1.9 0.13
 9 3 -1 1.7 0.15
 -9 3 1 1.71 0.15
 -9 3 1 1.82 0.14
 -9 3 1 1.78 0.12
 -9 3 1 1.84 0.15
 9 3 -1 1.63 0.14
 9 3 -1 1.59 0.15
 8 -3 -1 0.47 0.08
 8 -3 -1 0.37 0.09
 8 -3 -1 0.52 0.07
 -8 -3 1 0.56 0.06
 -8 -3 1 0.59 0.05
 8 -3 -1 0.5 0.09
 -8 -3 1 0.55 0.05
 8 -3 -1 0.52 0.07
 -8 -3 1 0.71 0.11
 -8 -3 1 0.82 0.13
 8 -3 -1 0.3 0.08
 8 -3 -1 0.46 0.08
 -8 3 1 0.39 0.09
 -8 3 1 0.56 0.07
 8 3 -1 0.71 0.1
 -8 3 1 0.58 0.11
 -8 3 1 0.63 0.08
 -8 3 1 0.53 0.08
 8 3 -1 0.52 0.1
 7 -3 -1 5.55 0.35
 -7 -3 1 5.05 0.34
 7 -3 -1 5.69 0.33
 -7 -3 1 5.37 0.36
 7 -3 -1 5.73 0.35
 7 -3 -1 5.75 0.33
 7 -3 -1 5.66 0.36
 7 -3 -1 5.55 0.36
 -7 -3 1 5.07 0.36
 -7 3 1 5.74 0.36
 7 3 -1 4.93 0.35
 -7 3 1 5.66 0.36
 -7 3 1 5.69 0.33
 -7 3 1 5.8 0.35
 7 3 -1 5.03 0.35
 7 3 -1 5 0.35
 6 -3 -1 7.82 0.53
 -6 -3 1 8.49 0.53
 6 -3 -1 7.89 0.53
 -6 -3 1 8.71 0.53
 6 -3 -1 8.26 0.53
 6 -3 -1 8.08 0.49
 -6 -3 1 8.89 0.53
 6 -3 -1 8.22 0.52
 -6 -3 1 8.44 0.49
 -6 -3 1 8.7 0.53
 -6 -3 1 8.93 0.49
 6 -3 -1 8.4 0.49
 -6 3 1 8.45 0.53
 -6 3 1 8.32 0.49
 6 3 -1 8.75 0.52
 -6 3 1 8.42 0.53
 -6 3 1 8.19 0.49
 6 3 -1 8.94 0.53
 -6 3 1 8.34 0.54
 6 3 -1 8.62 0.53
 5 -3 -1 19.29 1.19
 5 -3 -1 19.03 1.17
 5 -3 -1 19.43 1.1
 5 -3 -1 19 1.16
 5 -3 -1 19.09 1.1
 -5 -3 1 18.38 1.09
 -5 -3 1 18.4 1.16
 5 -3 -1 18.87 1.19
 5 -3 -1 19.58 1.15
 -5 3 1 19.39 1.19
 -5 3 1 19.18 1.1
 -5 3 1 19.32 1.1
 -5 3 1 19.68 1.17
 5 3 -1 18 1.15
 4 -3 -1 2.42 0.16
 -4 -3 1 2.33 0.18
 4 -3 -1 2.65 0.17
 -4 -3 1 2.15 0.17
 4 -3 -1 2.47 0.17
 4 -3 -1 2.67 0.17
 4 3 -1 2.55 0.18
 -4 3 1 2.67 0.18
 -4 3 1 2.71 0.17
 3 -3 -1 3.98 0.26
 3 -3 -1 4.03 0.26
 3 -3 -1 4.02 0.26
 3 -3 -1 4 0.25
 -3 3 1 4.02 0.25
 2 -3 -1 0.31 0.04
 2 -3 -1 0.43 0.05
 -2 -3 1 0.34 0.04
 2 -3 -1 0.38 0.05
 2 -3 -1 0.45 0.05
 2 -3 -1 0.45 0.06
 2 -3 -1 0.47 0.04
 -2 -3 1 0.32 0.04
 -2 -3 1 0.43 0.03
 -2 3 1 0.41 0.05
 2 3 -1 0.38 0.03
 -2 3 1 0.51 0.05
 2 3 -1 0.41 0.03
 -2 3 1 0.44 0.05
 2 3 -1 0.43 0.05
 2 3 -1 0.52 0.05
 2 3 -1 0.34 0.05
 -2 3 1 0.4 0.05
 2 3 -1 0.42 0.03
 -2 3 1 0.38 0.05
 -2 -3 -1 0.72 0.06
 2 -3 1 0.63 0.07
 -2 -3 -1 0.68 0.06
 -2 -3 -1 0.76 0.06
 -2 -3 -1 0.63 0.07
 2 -3 1 0.56 0.06
 2 -3 1 0.58 0.07
 -2 -3 -1 0.76 0.06
 2 -3 1 0.65 0.07
 2 -3 1 0.68 0.07
 2 -3 1 0.71 0.06
 -2 3 -1 0.62 0.06
 2 3 1 0.74 0.06
 2 3 1 0.72 0.06
 2 3 1 0.67 0.06
 2 3 1 0.75 0.06
 -2 3 -1 0.6 0.07
 2 3 1 0.63 0.06
 -2 3 -1 0.65 0.07
 -2 3 -1 0.59 0.07
 2 3 1 0.7 0.06
 2 3 1 0.65 0.07
 3 -3 1 5.63 0.38
 3 -3 1 5.77 0.37
 -3 -3 -1 5.99 0.36
 3 -3 1 6.07 0.36
 -3 -3 -1 5.78 0.34
 -3 -3 -1 6.05 0.37
 -3 -3 -1 5.66 0.37
 -3 -3 -1 6 0.37
 3 -3 1 5.73 0.35
 3 -3 1 5.52 0.35
 3 -3 1 5.9 0.38
 -3 -3 -1 5.91 0.34
 -3 3 -1 5.77 0.38
 3 3 1 6.12 0.36
 3 3 1 5.85 0.37
 3 3 1 6.07 0.37
 3 3 1 5.82 0.37
 3 3 1 5.82 0.34
 -3 3 -1 5.87 0.35
 -3 3 -1 5.96 0.36
 3 3 1 5.99 0.37
 3 3 1 5.52 0.34
 4 -3 1 0.48 0.07
 4 -3 1 0.34 0.06
 -4 -3 -1 0.55 0.08
 4 -3 1 0.46 0.06
 4 -3 1 0.35 0.07
 -4 -3 -1 0.55 0.05
 4 -3 1 0.37 0.07
 -4 -3 -1 0.59 0.05
 4 -3 1 0.37 0.05
 -4 -3 -1 0.57 0.05
 -4 -3 -1 0.58 0.06
 -4 -3 -1 0.58 0.06
 -4 3 -1 0.4 0.07
 -4 3 -1 0.36 0.08
 -4 3 -1 0.42 0.07
 -4 3 -1 0.42 0.05
 -4 3 -1 0.3 0.06
 4 3 1 0.41 0.05
 -4 3 -1 0.36 0.07
 4 3 1 0.52 0.05
 4 3 1 0.52 0.05
 4 3 1 0.49 0.06
 4 3 1 0.48 0.08
 4 3 1 0.48 0.05
 -5 -3 -1 0.05 0.02
 5 -3 1 0.12 0.04
 5 -3 1 0.01 0.03
 5 -3 1 0.05 0.06
 -5 -3 -1 0.07 0.03
 -5 -3 -1 0.06 0.03
 5 -3 1 0.11 0.04
 5 -3 1 0.08 0.04
 5 -3 1 0.04 0.04
 -5 -3 -1 0.1 0.07
 -5 -3 -1 0.12 0.04
 5 3 1 0.07 0.06
 -5 3 -1 0.02 0.04
 5 3 1 0.05 0.03
 -5 3 -1 0.1 0.04
 5 3 1 0.06 0.02
 5 3 1 0.02 0.03
 -5 3 -1 0.01 0.03
 -5 3 -1 0.11 0.07
 5 3 1 0.06 0.03
 5 3 1 0.04 0.02
 5 3 1 0.07 0.04
 -6 -3 -1 0.21 0.04
 6 -3 1 0.23 0.05
 -6 -3 -1 0.2 0.04
 6 -3 1 0.19 0.05
 6 -3 1 0.22 0.05
 6 -3 1 0.23 0.07
 6 -3 1 0.17 0.05
 6 -3 1 0.27 0.05
 -6 -3 -1 0.26 0.08
 -6 -3 -1 0.25 0.04
 -6 3 -1 0.24 0.05
 -6 3 -1 0.22 0.05
 6 3 1 0.19 0.04
 -6 3 -1 0.36 0.08
 -6 3 -1 0.25 0.05
 6 3 1 0.22 0.05
 6 3 1 0.2 0.04
 6 3 1 0.26 0.05
 -6 3 -1 0.25 0.05
 6 3 1 0.21 0.04
 6 3 1 0.18 0.04
 -6 3 -1 0.4 0.09
 6 3 1 0.18 0.07
 7 -3 1 0.73 0.09
 -7 -3 -1 0.91 0.08
 -7 -3 -1 0.87 0.1
 -7 -3 -1 0.93 0.09
 7 -3 1 0.72 0.08
 -7 -3 -1 0.74 0.13
 7 -3 1 0.81 0.09
 7 -3 1 0.9 0.11
 7 -3 1 0.69 0.09
 7 -3 1 0.8 0.1
 -7 -3 -1 0.82 0.07
 -7 3 -1 0.77 0.12
 7 3 1 0.7 0.09
 -7 3 -1 0.63 0.09
 7 3 1 0.87 0.06
 7 3 1 0.83 0.07
 -7 3 -1 0.83 0.09
 -7 3 -1 0.77 0.1
 7 3 1 0.87 0.08
 -7 3 -1 1.02 0.11
 7 3 1 0.78 0.08
 7 3 1 0.84 0.06
 7 3 1 0.96 0.11
 -7 3 -1 0.79 0.09
 8 -3 1 2.16 0.15
 -8 -3 -1 2.16 0.15
 -8 -3 -1 1.9 0.17
 -8 -3 -1 2.09 0.18
 8 -3 1 1.7 0.17
 -8 -3 -1 2.03 0.14
 -8 -3 -1 1.96 0.14
 8 -3 1 1.97 0.15
 8 -3 1 2.14 0.15
 8 -3 1 2.18 0.16
 8 3 1 1.95 0.14
 8 3 1 1.94 0.17
 8 3 1 2.16 0.16
 -8 3 -1 2.05 0.16
 -8 3 -1 2.03 0.17
 -8 3 -1 1.85 0.19
 -8 3 -1 2.14 0.16
 8 3 1 1.92 0.14
 8 3 1 2.16 0.13
 -8 3 -1 2.06 0.17
 -8 3 -1 2.06 0.14
 -9 -3 -1 1.76 0.12
 9 -3 1 1.89 0.14
 9 -3 1 1.64 0.14
 -9 -3 -1 1.7 0.16
 9 -3 1 1.54 0.16
 -9 -3 -1 1.89 0.14
 -9 -3 -1 1.85 0.17
 9 -3 1 1.93 0.13
 9 -3 1 1.88 0.15
 9 -3 1 1.75 0.14
 -9 3 -1 1.74 0.16
 -9 3 -1 1.83 0.16
 -9 3 -1 1.76 0.17
 9 3 1 1.62 0.13
 9 3 1 1.61 0.13
 -9 3 -1 1.98 0.13
 9 3 1 1.67 0.16
 9 3 1 1.68 0.12
 -9 3 -1 1.79 0.15
 9 3 1 1.49 0.15
 -9 3 -1 1.68 0.15
 -10 -3 -1 1.29 0.16
 -10 -3 -1 1.42 0.12
 10 -3 1 1.66 0.14
 10 -3 1 1.55 0.13
 -10 -3 -1 1.36 0.12
 -10 -3 -1 1.49 0.17
 10 -3 1 1.5 0.13
 10 -3 1 1.56 0.13
 10 -3 1 1.51 0.14
 -10 -3 -1 1.24 0.14
 -10 -3 -1 1.47 0.14
 10 3 1 1.55 0.11
 10 3 1 1.41 0.13
 10 3 1 1.4 0.11
 -10 3 -1 1.48 0.14
 -10 3 -1 1.63 0.16
 10 3 1 1.46 0.16
 -10 3 -1 1.55 0.16
 -10 3 -1 1.58 0.15
 -11 -3 -1 0.09 0.11
 -11 -3 -1 0.18 0.07
 -11 -3 -1 -0.08 0.1
 -11 -3 -1 0.17 0.07
 11 -3 1 0.12 0.06
 11 -3 1 0.07 0.06
 11 -3 1 0.19 0.08
 -11 -3 -1 0.15 0.07
 11 -3 1 0.02 0.05
 11 -3 1 0.12 0.06
 11 -3 1 0.12 0.07
 -11 3 -1 0.04 0.08
 11 3 1 0.04 0.06
 11 3 1 0.16 0.05
 -11 3 -1 -0.04 0.1
 11 3 1 0.11 0.04
 -11 3 -1 0.05 0.09
 -11 3 -1 0.14 0.08
 11 3 1 0.09 0.06
 11 3 1 0.11 0.11
 -12 -3 -1 0.09 0.09
 -12 -3 -1 0.15 0.08
 12 -3 1 0.17 0.07
 12 -3 1 0.12 0.05
 -12 -3 -1 0.15 0.12
 12 -3 1 0.14 0.06
 -12 -3 -1 0.09 0.08
 12 -3 1 0.19 0.08
 -12 3 -1 0.24 0.12
 12 3 1 0.14 0.05
 12 3 1 0.1 0.07
 12 3 1 0.13 0.05
 -12 3 -1 0.2 0.1
 12 3 1 0.09 0.13
 -13 -3 -1 0.3 0.14
 -13 -3 -1 0.27 0.09
 -13 -3 -1 0.14 0.09
 13 -3 1 0.69 0.13
 -13 -3 -1 0.36 0.14
 13 3 1 0.11 0.08
 -13 3 -1 0.42 0.13
 -13 3 -1 0.27 0.12
 14 -3 1 0.9 0.15
 -14 -3 -1 0.64 0.16
 -14 -3 -1 0.78 0.17
 14 -3 1 0.47 0.08
 -14 3 -1 0.65 0.17
 -15 -3 -1 -0.04 0.14
 15 -3 1 0.07 0.07
 -15 -3 -1 0.11 0.16
 15 -3 1 0.14 0.11
 -16 -4 1 0.88 0.2
 16 -4 -1 0.44 0.08
 -15 -4 1 0.19 0.15
 15 -4 -1 0.3 0.07
 15 -4 -1 0.36 0.09
 -15 -4 1 0.34 0.17
 -15 4 1 0.29 0.15
 14 -4 -1 0.3 0.08
 -14 -4 1 0.23 0.14
 -14 -4 1 0.34 0.15
 14 -4 -1 0.22 0.07
 -14 -4 1 0.19 0.09
 -14 4 1 0.27 0.15
 -14 4 1 0.23 0.11
 -13 -4 1 2.67 0.27
 -13 -4 1 3.11 0.24
 13 -4 -1 3.27 0.22
 -13 -4 1 3.06 0.2
 13 -4 -1 3.15 0.21
 -13 4 1 3.11 0.27
 -13 4 1 3.16 0.28
 -13 4 1 3.3 0.24
 -12 -4 1 0.01 0.12
 12 -4 -1 -0.03 0.06
 12 -4 -1 -0.04 0.09
 12 -4 -1 0.01 0.04
 -12 -4 1 0.08 0.06
 12 -4 -1 0.05 0.04
 12 -4 -1 -0.03 0.07
 -12 -4 1 0.08 0.11
 -12 -4 1 0.02 0.06
 -12 4 1 0.24 0.12
 12 4 -1 -0.1 0.12
 12 4 -1 -0.02 0.08
 -12 4 1 0.14 0.09
 -12 4 1 0.1 0.08
 -11 -4 1 0.02 0.05
 11 -4 -1 0 0.05
 -11 -4 1 0.09 0.1
 -11 -4 1 0.1 0.11
 11 -4 -1 0.05 0.05
 11 -4 -1 -0.1 0.08
 -11 -4 1 0.07 0.04
 -11 -4 1 0.01 0.05
 11 -4 -1 0.02 0.04
 11 4 -1 0 0.09
 -11 4 1 0.07 0.07
 -11 4 1 -0.01 0.09
 -11 4 1 0.02 0.08
 11 4 -1 0.01 0.07
 10 -4 -1 0.33 0.08
 -10 -4 1 0.54 0.08
 -10 -4 1 0.54 0.06
 10 -4 -1 0.36 0.08
 10 -4 -1 0.58 0.09
 10 -4 -1 0.39 0.08
 10 -4 -1 0.5 0.11
 -10 -4 1 0.65 0.06
 -10 -4 1 0.66 0.13
 -10 -4 1 0.54 0.08
 10 -4 -1 0.35 0.09
 -10 -4 1 0.59 0.11
 -10 4 1 0.39 0.08
 -10 4 1 0.32 0.08
 -10 4 1 0.55 0.13
 10 4 -1 0.58 0.1
 -10 4 1 0.41 0.1
 10 4 -1 0.64 0.11
 10 4 -1 0.51 0.11
 9 -4 -1 3.29 0.23
 9 -4 -1 3.28 0.23
 -9 -4 1 3.75 0.25
 -9 -4 1 3.61 0.23
 9 -4 -1 3.42 0.22
 9 -4 -1 3.29 0.22
 -9 -4 1 3.66 0.25
 9 -4 -1 3.13 0.24
 9 -4 -1 3.12 0.24
 -9 -4 1 3.58 0.2
 -9 -4 1 3.62 0.22
 -9 -4 1 3.39 0.2
 9 -4 -1 3.11 0.24
 -9 4 1 3.22 0.24
 9 4 -1 3.53 0.23
 -9 4 1 3.45 0.24
 9 4 -1 3.51 0.25
 9 4 -1 3.31 0.24
 -9 4 1 3.63 0.25
 -9 4 1 3.35 0.22
 -8 -4 1 11.23 0.67
 -8 -4 1 10.36 0.66
 8 -4 -1 10.97 0.67
 -8 -4 1 10.21 0.66
 -8 -4 1 10.48 0.66
 8 -4 -1 10.46 0.67
 8 -4 -1 11.02 0.62
 8 -4 -1 10.36 0.66
 8 -4 -1 10.94 0.67
 -8 -4 1 10.37 0.61
 8 -4 -1 10.92 0.62
 -8 -4 1 10.14 0.61
 8 -4 -1 10.56 0.65
 -8 4 1 10.88 0.62
 -8 4 1 10.79 0.68
 8 4 -1 9.94 0.66
 -8 4 1 10.86 0.67
 -8 4 1 10.91 0.67
 8 4 -1 10.58 0.67
 -8 4 1 10.86 0.62
 7 -4 -1 5.47 0.35
 7 -4 -1 5.51 0.35
 -7 -4 1 5.46 0.34
 7 -4 -1 5.35 0.35
 7 -4 -1 5.46 0.32
 -7 -4 1 5.17 0.31
 -7 -4 1 5.55 0.31
 -7 -4 1 5.78 0.36
 -7 -4 1 5.43 0.35
 7 -4 -1 5.4 0.33
 -7 -4 1 5.17 0.34
 7 -4 -1 5.34 0.35
 -7 4 1 5.37 0.35
 -7 4 1 5.71 0.35
 7 4 -1 5.06 0.35
 7 4 -1 5.36 0.35
 7 4 -1 5.26 0.34
 -7 4 1 5.32 0.32
 -7 4 1 5.66 0.36
 6 -4 -1 9.84 0.59
 -6 -4 1 10.75 0.63
 6 -4 -1 9.86 0.64
 -6 -4 1 10.4 0.63
 -6 -4 1 10.03 0.58
 6 -4 -1 10.04 0.59
 6 -4 -1 9.88 0.63
 6 -4 -1 9.73 0.63
 6 -4 -1 9.83 0.64
 6 -4 -1 9.81 0.62
 -6 -4 1 10.63 0.63
 6 4 -1 10.14 0.63
 6 4 -1 10.86 0.63
 -6 4 1 9.96 0.59
 -6 4 1 10.15 0.64
 6 4 -1 10.72 0.62
 -6 4 1 9.81 0.59
 -6 4 1 9.9 0.64
 -6 4 1 10.09 0.64
 5 -4 -1 41.97 2.6
 5 -4 -1 42.76 2.56
 5 -4 -1 40.77 2.52
 5 -4 -1 43.14 2.4
 5 -4 -1 41.04 2.6
 5 -4 -1 42.35 2.52
 -5 -4 1 41.84 2.52
 5 -4 -1 40.78 2.4
 -5 -4 1 42.92 2.39
 -5 4 1 42.18 2.6
 5 4 -1 40.54 2.56
 -5 4 1 40.71 2.6
 -5 4 1 41 2.56
 5 4 -1 42.28 2.52
 -5 4 1 42.1 2.4
 -4 -4 1 0.68 0.08
 4 -4 -1 0.76 0.07
 4 -4 -1 0.51 0.07
 -4 -4 1 0.77 0.07
 -4 -4 1 0.59 0.04
 4 -4 -1 0.59 0.07
 -4 -4 1 0.62 0.04
 4 4 -1 0.68 0.07
 -4 4 1 0.64 0.08
 4 4 -1 0.49 0.07
 -4 4 1 0.79 0.07
 -4 4 1 0.51 0.08
 -4 4 1 0.61 0.07
 -4 4 1 0.61 0.08
 -3 -4 1 378.58 21.93
 3 -4 -1 349.71 22.64
 -3 -4 1 357.55 21.95
 3 -4 -1 353.11 20.87
 -3 -4 1 368.7 20.86
 3 -4 -1 361.81 21.95
 -3 -4 1 377.64 22.62
 -3 -4 1 372.43 22.25
 3 -4 -1 358.56 22.63
 3 -4 -1 362.72 20.87
 -3 4 1 359.35 22.25
 3 4 -1 368.52 22.24
 -3 4 1 367.3 20.87
 -3 4 1 361.46 21.96
 3 4 -1 355.83 20.86
 -3 4 1 384.1 22.64
 2 -4 -1 0.19 0.04
 -2 -4 1 0.2 0.04
 -2 -4 1 0.26 0.04
 2 -4 -1 0.3 0.05
 2 -4 -1 0.22 0.05
 2 -4 -1 0.23 0.05
 -2 -4 1 0.24 0.03
 -2 -4 1 0.21 0.03
 -2 -4 1 0.2 0.05
 2 -4 -1 0.15 0.04
 2 4 -1 0.18 0.03
 -2 4 1 0.15 0.04
 2 4 -1 0.16 0.03
 -2 4 1 0.14 0.03
 2 4 -1 0.21 0.05
 2 4 -1 0.27 0.04
 -2 4 1 0.17 0.04
 -2 4 1 0.15 0.04
 2 4 -1 0.21 0.03
 2 4 -1 0.22 0.05
 -2 4 1 0.26 0.05
 -2 4 1 0.21 0.04
 1 -4 1 20.04 1.33
 -1 -4 -1 22.08 1.33
 -1 -4 -1 21.05 1.33
 1 -4 1 20.95 1.22
 1 -4 1 20.94 1.29
 1 -4 1 22.2 1.33
 1 4 1 21.78 1.22
 -1 4 -1 20.7 1.22
 1 4 1 19.88 1.33
 1 4 1 20.97 1.29
 1 4 1 19.95 1.33
 1 4 1 22.16 1.29
 -1 4 -1 22.21 1.29
 -1 4 -1 21.79 1.22
 -1 4 -1 22.15 1.33
 -2 -4 -1 0.7 0.07
 2 -4 1 0.69 0.08
 -2 -4 -1 0.73 0.07
 -2 -4 -1 0.71 0.08
 -2 -4 -1 0.63 0.07
 2 -4 1 0.75 0.08
 2 -4 1 0.76 0.08
 2 -4 1 0.67 0.08
 2 -4 1 0.72 0.07
 -2 -4 -1 0.75 0.07
 2 4 1 0.68 0.06
 -2 4 -1 0.61 0.08
 2 4 1 0.65 0.06
 -2 4 -1 0.67 0.08
 2 4 1 0.75 0.07
 2 4 1 0.65 0.07
 -2 4 -1 0.78 0.08
 2 4 1 0.64 0.09
 -2 4 -1 0.78 0.09
 2 4 1 0.78 0.07
 2 4 1 0.69 0.06
 -2 4 -1 0.72 0.07
 3 -4 1 20.88 1.18
 -3 -4 -1 21.15 1.18
 -3 -4 -1 20.84 1.26
 -3 -4 -1 20.58 1.24
 -3 -4 -1 20.06 1.18
 3 -4 1 20.6 1.28
 -3 -4 -1 21.02 1.28
 3 -4 1 20.66 1.24
 3 -4 1 19.44 1.18
 -3 -4 -1 21.72 1.25
 3 -4 1 20.75 1.25
 3 -4 1 21.44 1.28
 3 4 1 20.93 1.26
 -3 4 -1 20.58 1.28
 -3 4 -1 20.73 1.24
 3 4 1 19.99 1.18
 3 4 1 19.77 1.25
 3 4 1 20.46 1.28
 3 4 1 20.28 1.24
 3 4 1 20.39 1.18
 -3 4 -1 19.5 1.28
 -3 4 -1 20.2 1.19
 4 -4 1 0.92 0.09
 -4 -4 -1 0.91 0.07
 4 -4 1 0.76 0.07
 4 -4 1 0.8 0.08
 4 -4 1 0.73 0.08
 -4 -4 -1 0.91 0.07
 -4 -4 -1 0.84 0.07
 4 -4 1 0.83 0.08
 -4 -4 -1 0.82 0.07
 -4 -4 -1 0.88 0.09
 -4 -4 -1 0.95 0.08
 -4 4 -1 0.74 0.08
 -4 4 -1 0.82 0.08
 4 4 1 0.88 0.07
 4 4 1 0.88 0.07
 4 4 1 0.97 0.09
 4 4 1 0.88 0.07
 4 4 1 0.95 0.07
 -4 4 -1 0.77 0.07
 4 4 1 0.83 0.07
 -4 4 -1 0.86 0.08
 -4 4 -1 0.86 0.08
 5 -4 1 11.58 0.66
 -5 -4 -1 11.6 0.65
 5 -4 1 11.2 0.69
 -5 -4 -1 11.31 0.69
 5 -4 1 11.51 0.71
 5 -4 1 11.24 0.71
 -5 -4 -1 11.49 0.7
 5 -4 1 11.09 0.7
 5 -4 1 11.02 0.66
 -5 -4 -1 11.4 0.65
 -5 -4 -1 11.63 0.7
 5 4 1 11.21 0.71
 5 4 1 11.53 0.69
 -5 4 -1 10.9 0.72
 -5 4 -1 11.23 0.69
 5 4 1 11.21 0.65
 -5 4 -1 11.18 0.7
 5 4 1 11.14 0.65
 5 4 1 11.62 0.7
 -5 4 -1 11.35 0.66
 5 4 1 11.54 0.7
 -5 4 -1 11.28 0.71
 -6 -4 -1 1.14 0.09
 6 -4 1 0.92 0.09
 6 -4 1 0.91 0.11
 6 -4 1 0.9 0.1
 -6 -4 -1 1.11 0.08
 6 -4 1 0.83 0.1
 6 -4 1 0.85 0.1
 -6 -4 -1 1.31 0.12
 6 -4 1 0.9 0.1
 -6 -4 -1 1.23 0.09
 -6 -4 -1 1.18 0.1
 6 4 1 1.15 0.08
 -6 4 -1 1 0.11
 -6 4 -1 0.91 0.1
 6 4 1 1.06 0.08
 6 4 1 1.14 0.11
 6 4 1 1.18 0.09
 6 4 1 1.03 0.1
 -6 4 -1 0.97 0.11
 6 4 1 1.12 0.08
 7 -4 1 2.5 0.16
 -7 -4 -1 2.26 0.15
 7 -4 1 2.56 0.16
 -7 -4 -1 2.34 0.19
 -7 -4 -1 2.35 0.15
 7 -4 1 2.32 0.18
 7 -4 1 2.34 0.17
 7 -4 1 2.42 0.17
 -7 -4 -1 2.38 0.18
 7 -4 1 2.7 0.19
 -7 -4 -1 2.39 0.17
 -7 4 -1 2.41 0.17
 -7 4 -1 2.47 0.16
 -7 4 -1 2.43 0.17
 7 4 1 2.23 0.15
 7 4 1 2.28 0.17
 7 4 1 2.17 0.18
 7 4 1 2.12 0.16
 -7 4 -1 2.41 0.18
 -7 4 -1 2.46 0.18
 7 4 1 2.18 0.15
 -8 -4 -1 3.86 0.25
 8 -4 1 3.25 0.25
 -8 -4 -1 3.89 0.22
 8 -4 1 3.48 0.23
 8 -4 1 3.3 0.24
 8 -4 1 3.52 0.23
 8 -4 1 3.37 0.25
 -8 4 -1 3.26 0.23
 -8 4 -1 3.53 0.25
 -8 4 -1 3.27 0.25
 8 4 1 3.98 0.26
 8 4 1 3.76 0.23
 8 4 1 3.64 0.25
 -8 4 -1 3.32 0.25
 8 4 1 3.67 0.21
 9 -4 1 5.17 0.33
 9 -4 1 5.17 0.34
 -9 -4 -1 5.37 0.32
 9 -4 1 5.2 0.32
 9 -4 1 5.25 0.35
 9 -4 1 4.99 0.35
 -9 -4 -1 5.61 0.35
 -9 -4 -1 5.63 0.37
 -9 -4 -1 5.59 0.35
 -9 4 -1 5.13 0.35
 9 4 1 5.46 0.31
 9 4 1 5.2 0.34
 9 4 1 5.21 0.31
 9 4 1 5.34 0.35
 -9 4 -1 5.19 0.36
 -9 4 -1 5.1 0.32
 9 4 1 5.1 0.36
 -9 4 -1 5.23 0.33
 -9 4 -1 5.65 0.36
 -10 -4 -1 0.69 0.08
 10 -4 1 0.72 0.1
 10 -4 1 0.85 0.11
 -10 -4 -1 0.79 0.11
 10 -4 1 0.88 0.12
 10 -4 1 0.59 0.1
 -10 -4 -1 0.67 0.14
 10 -4 1 0.78 0.1
 -10 -4 -1 0.56 0.09
 -10 -4 -1 0.6 0.12
 -10 4 -1 0.73 0.13
 -10 4 -1 0.76 0.12
 -10 4 -1 0.74 0.12
 10 4 1 0.7 0.14
 10 4 1 0.66 0.07
 -10 4 -1 0.58 0.1
 10 4 1 0.56 0.07
 10 4 1 0.55 0.1
 -11 -4 -1 0.87 0.15
 -11 -4 -1 0.98 0.13
 11 -4 1 0.79 0.11
 11 -4 1 0.83 0.11
 -11 -4 -1 0.81 0.11
 11 -4 1 0.84 0.12
 11 -4 1 0.79 0.12
 -11 -4 -1 1.15 0.16
 11 -4 1 0.76 0.14
 -11 4 -1 0.63 0.14
 11 4 1 0.91 0.08
 11 4 1 0.84 0.11
 -11 4 -1 0.93 0.15
 -11 4 -1 0.82 0.15
 11 4 1 0.94 0.08
 11 4 1 1.04 0.16
 12 -4 1 -0.07 0.06
 12 -4 1 0.04 0.06
 12 -4 1 0.01 0.07
 -12 -4 -1 -0.02 0.07
 -12 -4 -1 0.14 0.12
 -12 -4 -1 0.05 0.07
 -12 -4 -1 -0.02 0.08
 12 4 1 -0.06 0.13
 12 4 1 -0.05 0.04
 -12 4 -1 0.11 0.12
 12 4 1 -0.02 0.07
 -12 4 -1 -0.03 0.1
 12 4 1 -0.05 0.04
 -13 -4 -1 0.69 0.14
 13 -4 1 0.48 0.1
 -13 -4 -1 0.1 0.1
 -13 -4 -1 0.2 0.09
 -13 -4 -1 0.47 0.09
 13 -4 1 0.35 0.08
 13 -4 1 0.23 0.06
 -13 -4 -1 0.54 0.17
 13 4 1 0.31 0.08
 -13 4 -1 0.47 0.14
 13 4 1 0.48 0.16
 -13 4 -1 0.23 0.12
 14 -4 1 0.34 0.1
 14 -4 1 0.25 0.08
 -14 -4 -1 0.2 0.16
 -14 -4 -1 0.28 0.14
 -14 4 -1 0.21 0.15
 -15 -4 -1 -0.15 0.16
 15 -4 1 0.17 0.08
 -15 -4 -1 0.16 0.16
 15 -4 1 0.03 0.11
 -16 -5 1 0.11 0.19
 -16 -5 1 -0.28 0.14
 16 -5 -1 0.06 0.07
 -16 5 1 0.24 0.19
 -15 -5 1 0.53 0.18
 -15 -5 1 0.42 0.17
 15 -5 -1 0.3 0.1
 -15 5 1 0.32 0.17
 -14 -5 1 0.11 0.16
 14 -5 -1 0.15 0.07
 14 -5 -1 0.06 0.08
 -14 -5 1 0.18 0.15
 -14 -5 1 -0.01 0.09
 -14 5 1 -0.09 0.11
 13 -5 -1 -0.14 0.08
 13 -5 -1 -0.05 0.07
 -13 -5 1 -0.07 0.07
 -13 -5 1 0.15 0.14
 -13 -5 1 -0.05 0.07
 -13 -5 1 0.03 0.15
 -13 5 1 0.18 0.13
 -13 5 1 0 0.1
 -13 5 1 0 0.1
 12 -5 -1 0.63 0.09
 -12 -5 1 0.69 0.11
 12 -5 -1 0.62 0.1
 12 -5 -1 0.49 0.11
 -12 -5 1 0.76 0.18
 12 -5 -1 0.66 0.1
 -12 -5 1 0.44 0.1
 -12 -5 1 0.73 0.16
 12 -5 -1 0.59 0.09
 -12 5 1 0.69 0.16
 12 5 -1 0.48 0.1
 -12 5 1 0.59 0.1
 -12 5 1 0.71 0.16
 12 5 -1 0.59 0.14
 -11 -5 1 1.34 0.18
 -11 -5 1 1.56 0.17
 11 -5 -1 1.16 0.15
 -11 -5 1 1.18 0.12
 11 -5 -1 1.21 0.12
 11 -5 -1 1.17 0.13
 -11 -5 1 1.25 0.11
 -11 -5 1 1.18 0.09
 11 -5 -1 1.31 0.13
 11 -5 -1 1.29 0.12
 11 5 -1 1.3 0.15
 -11 5 1 1.44 0.15
 11 5 -1 1.25 0.17
 -11 5 1 1.31 0.16
 -11 5 1 1.17 0.15
 10 -5 -1 0 0.06
 -10 -5 1 0.01 0.03
 10 -5 -1 -0.03 0.05
 10 -5 -1 -0.02 0.05
 10 -5 -1 0.07 0.07
 10 -5 -1 0.04 0.05
 -10 -5 1 0.06 0.04
 -10 -5 1 0.07 0.08
 -10 -5 1 -0.02 0.04
 -10 -5 1 0.03 0.03
 -10 -5 1 0.1 0.09
 -10 5 1 -0.02 0.05
 10 5 -1 0.03 0.06
 -10 5 1 0.09 0.09
 -10 5 1 0.04 0.07
 10 5 -1 0.07 0.09
 -10 5 1 0.01 0.06
 10 5 -1 -0.03 0.08
 -9 -5 1 0.36 0.04
 9 -5 -1 0.29 0.06
 -9 -5 1 0.52 0.11
 9 -5 -1 0.36 0.07
 9 -5 -1 0.32 0.08
 9 -5 -1 0.32 0.06
 -9 -5 1 0.44 0.09
 -9 -5 1 0.27 0.04
 -9 -5 1 0.31 0.06
 -9 -5 1 0.3 0.06
 9 -5 -1 0.23 0.06
 9 -5 -1 0.28 0.05
 -9 5 1 0.56 0.11
 9 5 -1 0.33 0.08
 9 5 -1 0.35 0.07
 9 5 -1 0.41 0.1
 -9 5 1 0.31 0.06
 -9 5 1 0.32 0.09
 -8 -5 1 0.74 0.11
 8 -5 -1 0.84 0.09
 -8 -5 1 0.71 0.11
 -8 -5 1 0.49 0.05
 8 -5 -1 0.72 0.09
 -8 -5 1 0.66 0.06
 8 -5 -1 0.71 0.12
 8 -5 -1 0.67 0.08
 8 -5 -1 0.47 0.09
 -8 -5 1 0.53 0.05
 8 -5 -1 0.8 0.09
 8 5 -1 0.7 0.09
 -8 5 1 0.82 0.11
 -8 5 1 0.71 0.1
 8 5 -1 0.44 0.1
 -8 5 1 0.78 0.09
 -8 5 1 0.66 0.08
 8 5 -1 0.6 0.11
 7 -5 -1 0.1 0.05
 -7 -5 1 0.26 0.08
 7 -5 -1 0.22 0.07
 -7 -5 1 0.13 0.03
 7 -5 -1 0.12 0.05
 7 -5 -1 0.02 0.05
 -7 -5 1 0.25 0.04
 -7 -5 1 0.21 0.04
 -7 -5 1 0.15 0.03
 7 -5 -1 0.06 0.05
 -7 5 1 0.11 0.05
 -7 5 1 0.01 0.05
 7 5 -1 0.38 0.08
 7 5 -1 0.11 0.07
 -7 5 1 0.16 0.07
 -7 5 1 0.11 0.05
 -6 -5 1 0.06 0.06
 -6 -5 1 0.08 0.02
 6 -5 -1 0.06 0.07
 6 -5 -1 0.07 0.04
 -6 -5 1 0.1 0.06
 6 -5 -1 0.11 0.04
 6 -5 -1 0.13 0.05
 -6 -5 1 0.08 0.02
 6 -5 -1 0.18 0.05
 -6 -5 1 0.04 0.02
 -6 5 1 0.1 0.07
 -6 5 1 0.1 0.04
 6 5 -1 0.01 0.05
 6 5 -1 0.08 0.04
 -6 5 1 0.08 0.05
 6 5 -1 0.01 0.05
 -5 -5 1 0.12 0.02
 5 -5 -1 0.27 0.06
 5 -5 -1 0.21 0.04
 5 -5 -1 0.14 0.04
 -5 -5 1 0.13 0.03
 5 -5 -1 0.07 0.04
 -5 -5 1 0.16 0.02
 5 -5 -1 0.15 0.04
 -5 -5 1 0.2 0.04
 -5 -5 1 0.25 0.06
 -5 -5 1 0.12 0.02
 5 5 -1 0.21 0.05
 -5 5 1 0.14 0.04
 -5 5 1 0.14 0.04
 -5 5 1 0.14 0.06
 5 5 -1 0.12 0.04
 -5 5 1 0.18 0.04
 5 5 -1 0.14 0.05
 -5 5 1 0.14 0.04
 4 -5 -1 0.36 0.06
 4 -5 -1 0.21 0.04
 -4 -5 1 0.2 0.04
 -4 -5 1 0.21 0.03
 -4 -5 1 0.27 0.03
 -4 -5 1 0.25 0.03
 -4 -5 1 0.26 0.06
 4 -5 -1 0.28 0.06
 4 -5 -1 0.35 0.06
 -4 -5 1 0.2 0.05
 -4 5 1 0.25 0.05
 4 5 -1 0.27 0.03
 -4 5 1 0.31 0.06
 4 5 -1 0.18 0.04
 4 5 -1 0.1 0.05
 4 5 -1 0.25 0.03
 -4 5 1 0.32 0.06
 -4 5 1 0.34 0.06
 3 -5 -1 28.46 1.87
 3 -5 -1 29.9 1.73
 -3 -5 1 31.43 1.87
 -3 -5 1 31.22 1.82
 3 -5 -1 29.97 1.73
 3 5 -1 30.97 1.87
 3 5 -1 30.92 1.82
 3 5 -1 31 1.84
 3 5 -1 31.08 1.72
 3 5 -1 29.36 1.72
 3 5 -1 29.84 1.87
 -3 5 1 29.42 1.73
 -3 5 1 28.03 1.87
 3 5 -1 29.6 1.82
 2 -5 -1 10.15 0.59
 2 -5 -1 9.61 0.64
 -2 -5 1 10.3 0.63
 -2 -5 1 10.21 0.59
 2 -5 -1 10.51 0.59
 -2 -5 1 10 0.62
 2 5 -1 10.26 0.59
 2 5 -1 10.19 0.63
 -2 5 1 10.47 0.64
 2 5 -1 9.86 0.62
 2 5 -1 9.93 0.62
 -2 5 1 10.7 0.59
 -2 5 1 9.78 0.62
 -1 -5 1 0.25 0.05
 -1 -5 1 0.22 0.05
 1 -5 -1 0.34 0.05
 -1 -5 1 0.36 0.05
 1 -5 -1 0.39 0.06
 1 -5 -1 0.35 0.05
 1 -5 -1 0.32 0.05
 1 -5 -1 0.29 0.06
 -1 -5 1 0.34 0.05
 -1 5 1 0.28 0.05
 1 5 -1 0.34 0.04
 -1 5 1 0.37 0.05
 -1 5 1 0.4 0.06
 1 5 -1 0.34 0.05
 -1 5 1 0.35 0.05
 1 5 -1 0.37 0.05
 1 5 -1 0.28 0.04
 -1 5 1 0.44 0.05
 1 5 -1 0.25 0.05
 0 -5 -1 1.61 0.12
 0 -5 1 1.87 0.12
 0 -5 1 1.77 0.12
 0 -5 1 1.8 0.12
 0 -5 -1 1.87 0.12
 0 -5 -1 1.88 0.11
 0 -5 -1 1.82 0.13
 0 -5 1 1.71 0.13
 0 -5 -1 1.69 0.12
 0 5 -1 1.98 0.12
 0 5 1 1.68 0.12
 0 5 -1 1.88 0.12
 0 5 1 1.93 0.13
 0 5 1 1.73 0.12
 0 5 -1 1.69 0.12
 0 5 1 1.86 0.12
 -1 -5 -1 1.74 0.12
 -1 -5 -1 1.72 0.13
 -1 -5 -1 1.77 0.13
 1 -5 1 1.57 0.12
 -1 -5 -1 1.84 0.12
 1 -5 1 1.71 0.12
 1 -5 1 1.67 0.13
 1 -5 1 1.7 0.12
 -1 -5 -1 1.87 0.12
 -1 5 -1 1.63 0.12
 1 5 1 1.96 0.12
 1 5 1 1.8 0.11
 -1 5 -1 1.8 0.12
 1 5 1 1.68 0.12
 1 5 1 1.83 0.12
 -1 5 -1 1.78 0.12
 -1 5 -1 1.74 0.13
 -2 -5 -1 3.24 0.21
 2 -5 1 3.26 0.22
 2 -5 1 3.05 0.22
 2 -5 1 3.27 0.21
 -2 -5 -1 2.93 0.2
 -2 -5 -1 3.32 0.22
 2 -5 1 3.43 0.2
 2 5 1 3.15 0.2
 2 5 1 3.47 0.22
 -2 5 -1 3.34 0.22
 -2 5 -1 3.44 0.21
 2 5 1 3.2 0.2
 2 5 1 3.15 0.21
 -2 5 -1 3.32 0.2
 2 5 1 3.22 0.21
 -2 5 -1 2.91 0.2
 -3 -5 -1 23.46 1.43
 3 -5 1 23.52 1.36
 -3 -5 -1 23.55 1.47
 3 -5 1 22.56 1.36
 3 -5 1 24.21 1.43
 -3 -5 -1 24.56 1.36
 3 -5 1 22.81 1.47
 -3 -5 -1 23.2 1.43
 3 -5 1 23.91 1.48
 3 5 1 23.62 1.43
 3 5 1 23.5 1.45
 -3 5 -1 24.88 1.48
 -3 5 -1 24.4 1.43
 3 5 1 23.63 1.47
 -3 5 -1 23.05 1.36
 3 5 1 23.78 1.36
 3 5 1 23.1 1.36
 4 -5 1 2.57 0.17
 4 -5 1 2.5 0.16
 -4 -5 -1 2.42 0.16
 -4 -5 -1 2.35 0.15
 -4 -5 -1 2.42 0.17
 4 -5 1 2.45 0.16
 4 -5 1 2.47 0.17
 4 -5 1 2.4 0.16
 4 -5 1 2.63 0.17
 -4 -5 -1 2.41 0.16
 -4 -5 -1 2.36 0.15
 -4 -5 -1 2.48 0.16
 4 5 1 2.34 0.16
 -4 5 -1 2.54 0.17
 4 5 1 2.29 0.15
 -4 5 -1 2.45 0.16
 4 5 1 2.37 0.17
 4 5 1 2.51 0.16
 -4 5 -1 2.63 0.17
 4 5 1 2.26 0.16
 -4 5 -1 2.45 0.16
 4 5 1 2.27 0.15
 4 5 1 2.46 0.16
 -5 -5 -1 7.48 0.42
 5 -5 1 7.18 0.43
 5 -5 1 7.54 0.47
 -5 -5 -1 7.42 0.45
 5 -5 1 7.01 0.46
 -5 -5 -1 7.59 0.46
 5 -5 1 7.37 0.47
 -5 -5 -1 7.29 0.45
 5 -5 1 6.91 0.45
 -5 5 -1 6.91 0.46
 5 5 1 7.51 0.45
 -5 5 -1 7.29 0.43
 -5 5 -1 7.08 0.46
 5 5 1 7.68 0.45
 5 5 1 7.31 0.45
 5 5 1 7.31 0.45
 -5 5 -1 7.16 0.47
 5 5 1 7.41 0.46
 5 5 1 6.89 0.42
 5 5 1 7.36 0.42
 -5 5 -1 6.78 0.44
 -6 -5 -1 0.43 0.06
 6 -5 1 0.47 0.06
 -6 -5 -1 0.48 0.1
 6 -5 1 0.28 0.06
 -6 -5 -1 0.42 0.06
 6 -5 1 0.43 0.07
 6 -5 1 0.33 0.08
 -6 -5 -1 0.48 0.07
 -6 -5 -1 0.43 0.07
 6 -5 1 0.37 0.07
 6 -5 1 0.34 0.06
 6 5 1 0.44 0.06
 6 5 1 0.54 0.06
 6 5 1 0.45 0.08
 6 5 1 0.42 0.04
 6 5 1 0.46 0.06
 -6 5 -1 0.37 0.06
 -6 5 -1 0.4 0.08
 -6 5 -1 0.29 0.06
 6 5 1 0.38 0.08
 6 5 1 0.54 0.04
 -6 5 -1 0.46 0.07
 7 -5 1 6.09 0.4
 7 -5 1 6.28 0.4
 7 -5 1 6.17 0.41
 7 -5 1 6.2 0.43
 -7 -5 -1 7 0.39
 -7 -5 -1 7.07 0.39
 7 5 1 6.75 0.39
 -7 5 -1 6.28 0.43
 7 5 1 7.06 0.42
 7 5 1 6.95 0.39
 7 5 1 6.72 0.43
 8 -5 1 0.88 0.1
 8 -5 1 0.74 0.09
 -8 -5 -1 0.79 0.08
 8 -5 1 0.68 0.11
 -8 -5 -1 0.77 0.09
 -8 -5 -1 0.89 0.11
 -8 -5 -1 0.79 0.07
 8 -5 1 0.82 0.11
 8 -5 1 0.85 0.13
 -8 -5 -1 0.83 0.12
 8 -5 1 0.75 0.1
 -8 5 -1 0.82 0.09
 -8 5 -1 0.77 0.1
 8 5 1 0.69 0.07
 -8 5 -1 0.63 0.1
 -8 5 -1 0.79 0.12
 -8 5 -1 0.67 0.11
 8 5 1 0.68 0.09
 8 5 1 0.88 0.11
 8 5 1 0.56 0.11
 -9 -5 -1 0.72 0.09
 -9 -5 -1 0.79 0.08
 9 -5 1 0.93 0.12
 9 -5 1 0.84 0.1
 9 -5 1 0.92 0.12
 9 -5 1 1.03 0.1
 -9 -5 -1 0.88 0.13
 -9 -5 -1 0.92 0.13
 9 -5 1 0.83 0.12
 9 -5 1 0.96 0.1
 -9 -5 -1 0.82 0.1
 -9 5 -1 1.17 0.12
 -9 5 -1 1.01 0.13
 9 5 1 0.76 0.07
 9 5 1 0.62 0.12
 -9 5 -1 1.02 0.12
 9 5 1 0.55 0.11
 -9 5 -1 1.1 0.09
 9 5 1 0.72 0.08
 9 5 1 0.77 0.1
 -10 -5 -1 0.1 0.1
 10 -5 1 0.24 0.06
 -10 -5 -1 0.17 0.09
 10 -5 1 0.15 0.07
 -10 -5 -1 0.21 0.06
 -10 -5 -1 0.19 0.05
 10 -5 1 0.16 0.07
 10 -5 1 0.25 0.08
 10 -5 1 0.23 0.06
 -10 -5 -1 0.18 0.06
 10 5 1 0.16 0.04
 10 5 1 0.23 0.1
 -10 5 -1 0.31 0.1
 -10 5 -1 0.19 0.08
 10 5 1 0.14 0.06
 -10 5 -1 0.14 0.07
 10 5 1 0.22 0.04
 -11 -5 -1 1.04 0.15
 -11 -5 -1 1.11 0.19
 -11 -5 -1 1.06 0.14
 11 -5 1 1.04 0.14
 11 -5 1 1.18 0.13
 11 -5 1 1.24 0.12
 11 -5 1 1.2 0.15
 -11 -5 -1 1.04 0.12
 11 5 1 1.08 0.09
 -11 5 -1 1.16 0.16
 11 5 1 1.27 0.17
 11 5 1 1.03 0.08
 -11 5 -1 1.14 0.14
 11 5 1 0.91 0.13
 -12 -5 -1 0.03 0.07
 12 -5 1 0.17 0.07
 -12 -5 -1 -0.05 0.09
 12 -5 1 0.1 0.07
 -12 -5 -1 -0.01 0.11
 12 -5 1 0.11 0.1
 -12 5 -1 -0.05 0.11
 -12 5 -1 0.15 0.12
 12 5 1 0.09 0.13
 -12 5 -1 0.07 0.11
 -13 -5 -1 0.46 0.14
 13 -5 1 0.3 0.1
 -13 -5 -1 0.19 0.1
 13 -5 1 0.3 0.08
 -13 -5 -1 0.09 0.14
 -13 -5 -1 0.3 0.08
 13 -5 1 0.14 0.07
 13 -5 1 0.32 0.08
 13 5 1 0.33 0.15
 -13 5 -1 0.31 0.13
 -13 5 -1 0.23 0.14
 -13 5 -1 0.09 0.12
 14 -5 1 0.21 0.08
 -14 -5 -1 0.06 0.15
 14 -5 1 0.11 0.06
 14 -5 1 0.11 0.1
 -14 -5 -1 0.2 0.15
 -14 5 -1 0.07 0.15
 15 -5 1 -0.06 0.08
 -15 -5 -1 0.05 0.17
 -15 -5 -1 -0.12 0.14
 -15 5 -1 -0.1 0.15
 16 -6 -1 -0.03 0.08
 -16 -6 1 -0.15 0.15
 15 -6 -1 0.23 0.08
 -15 -6 1 0.19 0.16
 15 -6 -1 0.34 0.1
 -15 -6 1 0.2 0.15
 -15 6 1 0.23 0.16
 -14 -6 1 0.43 0.16
 -14 -6 1 0.37 0.09
 -14 -6 1 0.41 0.15
 14 -6 -1 0.24 0.08
 14 -6 -1 0.33 0.1
 -14 6 1 0.27 0.13
 -13 -6 1 0.09 0.13
 13 -6 -1 0.13 0.06
 13 -6 -1 0.14 0.06
 13 -6 -1 0.07 0.09
 -13 -6 1 0.06 0.07
 -13 -6 1 0.06 0.07
 -13 -6 1 0.12 0.13
 -13 6 1 0.26 0.13
 -13 6 1 0.07 0.11
 12 -6 -1 1.56 0.15
 -12 -6 1 1.69 0.14
 12 -6 -1 1.59 0.14
 12 -6 -1 1.62 0.14
 -12 -6 1 1.92 0.2
 -12 -6 1 1.6 0.19
 -12 -6 1 1.67 0.15
 -12 6 1 1.72 0.2
 12 6 -1 1.56 0.17
 -12 6 1 1.57 0.19
 12 6 -1 1.17 0.2
 -12 6 1 1.64 0.18
 11 -6 -1 0.37 0.06
 -11 -6 1 0.3 0.11
 11 -6 -1 0.4 0.08
 11 -6 -1 0.42 0.09
 11 -6 -1 0.37 0.09
 11 -6 -1 0.46 0.11
 -11 -6 1 0.26 0.06
 -11 -6 1 0.24 0.12
 -11 -6 1 0.26 0.05
 11 6 -1 0.4 0.11
 -11 6 1 0.27 0.09
 -11 6 1 0.3 0.08
 -11 6 1 0.42 0.11
 11 6 -1 0.27 0.08
 10 -6 -1 0.89 0.12
 10 -6 -1 1.06 0.12
 -10 -6 1 0.82 0.14
 10 -6 -1 1.12 0.1
 -10 -6 1 0.86 0.09
 -10 -6 1 0.93 0.14
 10 -6 -1 0.96 0.11
 10 -6 -1 1.17 0.14
 -10 -6 1 0.89 0.09
 -10 6 1 1.2 0.13
 -10 6 1 1.2 0.14
 -10 6 1 1.15 0.12
 10 6 -1 0.85 0.13
 10 6 -1 0.69 0.12
 10 6 -1 0.96 0.13
 -9 -6 1 0.21 0.08
 9 -6 -1 0.2 0.06
 9 -6 -1 0.21 0.07
 9 -6 -1 0.15 0.05
 9 -6 -1 0.18 0.05
 9 -6 -1 0.3 0.07
 -9 -6 1 0.12 0.04
 -9 -6 1 0.23 0.04
 9 -6 -1 0.27 0.09
 -9 -6 1 0.14 0.1
 -9 -6 1 0.14 0.03
 -9 6 1 0.27 0.08
 9 6 -1 0.15 0.07
 9 6 -1 0.13 0.07
 9 6 -1 0.17 0.06
 -9 6 1 0.12 0.05
 -9 6 1 0.26 0.07
 -9 6 1 0.23 0.05
 8 -6 -1 16.61 1.04
 -8 -6 1 15.84 0.95
 -8 -6 1 15.88 1.03
 -8 -6 1 16.47 1.03
 8 -6 -1 15.93 1.02
 -8 -6 1 17.39 1.03
 -8 -6 1 17.07 0.95
 8 -6 -1 16.33 0.96
 -8 -6 1 17.15 1.02
 8 -6 -1 16.62 1.04
 8 -6 -1 16.63 0.96
 8 -6 -1 16.64 1.01
 -8 6 1 16.63 1.04
 -8 6 1 17 1.05
 8 6 -1 16.37 1.03
 -8 6 1 16.56 0.96
 8 6 -1 16.15 1.02
 -8 6 1 17.1 1.03
 8 6 -1 16.84 1.01
 -7 -6 1 1.91 0.15
 7 -6 -1 2.06 0.14
 7 -6 -1 2.11 0.15
 -7 -6 1 1.73 0.12
 -7 -6 1 1.87 0.16
 -7 -6 1 1.71 0.11
 7 6 -1 1.7 0.15
 7 6 -1 1.6 0.15
 7 6 -1 1.68 0.15
 -6 -6 1 8.69 0.55
 -6 -6 1 8.68 0.56
 -6 -6 1 8.44 0.56
 6 -6 -1 9.16 0.57
 6 -6 -1 9.22 0.55
 6 -6 -1 9.36 0.56
 -6 -6 1 8.54 0.51
 6 -6 -1 9.32 0.53
 6 -6 -1 9.31 0.57
 -6 -6 1 8.4 0.51
 6 -6 -1 9.16 0.52
 -6 -6 1 8.83 0.56
 -6 -6 1 8.27 0.55
 6 6 -1 8.76 0.55
 -6 6 1 9.17 0.55
 -6 6 1 8.94 0.52
 6 6 -1 8.75 0.56
 -6 6 1 9.27 0.57
 -6 6 1 9.44 0.57
 -6 6 1 9.12 0.57
 -5 -6 1 1.47 0.09
 5 -6 -1 1.45 0.11
 -5 -6 1 1.36 0.09
 -5 -6 1 1.33 0.09
 5 -6 -1 1.34 0.11
 5 -6 -1 1.41 0.12
 5 -6 -1 1.28 0.11
 -5 -6 1 1.34 0.12
 -5 -6 1 1.41 0.09
 -5 6 1 1.38 0.11
 -5 6 1 1.33 0.12
 5 6 -1 1.48 0.08
 5 6 -1 1.52 0.11
 -5 6 1 1.22 0.12
 5 6 -1 1.44 0.11
 -5 6 1 1.26 0.11
 -5 6 1 1.52 0.11
 5 6 -1 1.41 0.11
 4 -6 -1 25.96 1.57
 4 -6 -1 25.2 1.62
 -4 -6 1 26.55 1.57
 -4 -6 1 25.24 1.61
 4 -6 -1 26.47 1.49
 -4 -6 1 25.78 1.59
 -4 -6 1 26.23 1.57
 4 6 -1 27.11 1.57
 4 6 -1 26.59 1.48
 -4 6 1 25.77 1.62
 4 6 -1 25.51 1.59
 -4 6 1 25.56 1.57
 -4 6 1 26.03 1.59
 -4 6 1 25.12 1.62
 -4 6 1 26.29 1.49
 4 6 -1 25.34 1.48
 -3 -6 1 2.63 0.16
 -3 -6 1 2.92 0.16
 -3 -6 1 2.62 0.18
 -3 -6 1 2.53 0.18
 3 -6 -1 2.94 0.18
 -3 -6 1 2.55 0.18
 3 6 -1 2.66 0.17
 -3 6 1 2.97 0.18
 -3 6 1 2.97 0.17
 3 6 -1 2.6 0.18
 3 6 -1 2.55 0.16
 3 6 -1 2.51 0.16
 3 6 -1 2.54 0.18
 -2 -6 1 20.45 1.18
 2 -6 -1 18.37 1.21
 -2 -6 1 20.01 1.17
 -2 -6 1 19.06 1.21
 2 6 -1 18.78 1.21
 -2 6 1 19.04 1.21
 2 6 -1 19.88 1.17
 -2 6 1 19.49 1.18
 -2 6 1 19.48 1.12
 2 6 -1 19.07 1.21
 2 6 -1 18.98 1.11
 2 6 -1 18.73 1.11
 -2 6 1 20.34 1.21
 -2 6 1 19.82 1.12
 2 6 -1 19.62 1.18
 -1 -6 1 0.07 0.04
 -1 -6 1 0.05 0.04
 1 -6 -1 0.08 0.05
 1 -6 -1 0.07 0.04
 -1 -6 1 0.03 0.04
 1 -6 -1 0.08 0.04
 -1 -6 1 0.05 0.04
 1 -6 -1 0.01 0.04
 1 -6 -1 0.06 0.05
 1 6 -1 0.06 0.04
 1 6 -1 0.01 0.04
 -1 6 1 -0.01 0.04
 1 6 -1 0.08 0.04
 -1 6 1 0.02 0.04
 1 6 -1 0.01 0.04
 1 6 -1 0.08 0.03
 -1 6 1 0.09 0.04
 -1 6 1 0.07 0.04
 -1 6 1 0.13 0.05
 0 -6 1 65.34 3.94
 0 -6 -1 68.19 4.27
 0 -6 -1 69.69 4.14
 0 -6 1 69.19 4.14
 0 -6 -1 72.01 4.27
 0 -6 1 69.99 4.27
 0 -6 -1 65.31 3.94
 0 -6 -1 70.57 3.94
 0 6 1 65.87 4.27
 0 6 -1 69.61 3.94
 0 6 1 71.37 3.94
 0 6 1 65.87 4.27
 0 6 -1 71.94 4.27
 0 6 1 68.77 4.14
 -1 -6 -1 1.66 0.13
 1 -6 1 1.8 0.13
 -1 -6 -1 1.73 0.13
 -1 -6 -1 1.81 0.14
 1 -6 1 2.02 0.14
 1 -6 1 1.71 0.13
 -1 6 -1 2.02 0.14
 -1 6 -1 1.86 0.13
 1 6 1 1.6 0.12
 -1 6 -1 1.89 0.13
 -1 6 -1 1.81 0.14
 1 6 1 1.91 0.13
 -1 6 -1 1.99 0.13
 1 6 1 1.56 0.13
 1 6 1 1.93 0.14
 -2 -6 -1 200 12.26
 2 -6 1 191.78 11.89
 -2 -6 -1 195.24 11.88
 2 -6 1 198.52 11.32
 -2 -6 -1 200.87 11.31
 -2 -6 -1 194.06 12.27
 -2 -6 -1 200.97 11.9
 2 -6 1 195.79 11.31
 2 -6 1 199.33 12.26
 -2 6 -1 201.6 11.9
 -2 6 -1 193.57 12.26
 2 6 1 193.63 11.32
 2 6 1 196.51 11.88
 2 6 1 206.79 11.9
 2 6 1 197.8 12.27
 -3 -6 -1 0.58 0.07
 -3 -6 -1 0.51 0.06
 -3 -6 -1 0.44 0.06
 3 -6 1 0.59 0.08
 -3 -6 -1 0.52 0.06
 3 -6 1 0.62 0.08
 3 -6 1 0.59 0.07
 -3 -6 -1 0.49 0.06
 3 -6 1 0.58 0.06
 3 6 1 0.5 0.06
 3 6 1 0.67 0.07
 3 6 1 0.43 0.06
 -3 6 -1 0.53 0.07
 3 6 1 0.59 0.06
 -3 6 -1 0.57 0.08
 -3 6 -1 0.48 0.07
 3 6 1 0.48 0.06
 -3 6 -1 0.7 0.08
 3 6 1 0.56 0.07
 -4 -6 -1 0.43 0.05
 -4 -6 -1 0.48 0.06
 4 -6 1 0.29 0.07
 4 -6 1 0.31 0.07
 -4 -6 -1 0.42 0.05
 4 -6 1 0.24 0.06
 4 -6 1 0.3 0.05
 -4 -6 -1 0.42 0.07
 4 -6 1 0.28 0.07
 -4 -6 -1 0.28 0.05
 4 6 1 0.44 0.07
 4 6 1 0.44 0.06
 -4 6 -1 0.25 0.05
 4 6 1 0.43 0.05
 4 6 1 0.54 0.06
 -4 6 -1 0.4 0.06
 -4 6 -1 0.26 0.05
 -4 6 -1 0.3 0.07
 4 6 1 0.43 0.05
 4 6 1 0.47 0.05
 4 6 1 0.42 0.05
 -5 -6 -1 0.05 0.03
 5 -6 1 0.12 0.06
 5 -6 1 0.03 0.04
 5 -6 1 0.17 0.04
 -5 -6 -1 0.12 0.07
 -5 -6 -1 0.1 0.03
 5 -6 1 0.13 0.05
 -5 -6 -1 0.07 0.03
 5 -6 1 0.12 0.05
 -5 -6 -1 0.1 0.04
 -5 -6 -1 0.15 0.04
 5 -6 1 0.16 0.05
 5 6 1 0.12 0.03
 -5 6 -1 0.03 0.04
 -5 6 -1 0.29 0.07
 5 6 1 0.09 0.03
 -5 6 -1 0.04 0.06
 5 6 1 0.14 0.06
 -5 6 -1 0.14 0.04
 5 6 1 0.11 0.03
 -5 6 -1 0.17 0.05
 5 6 1 0.17 0.04
 5 6 1 0.18 0.04
 5 6 1 0.11 0.04
 -6 -6 -1 5.22 0.33
 -6 -6 -1 5.43 0.31
 -6 -6 -1 5.22 0.31
 6 -6 1 5.4 0.32
 6 -6 1 5.09 0.35
 6 -6 1 5.22 0.35
 6 -6 1 5.52 0.33
 6 -6 1 5.44 0.32
 6 -6 1 5.6 0.35
 -6 -6 -1 5.31 0.35
 -6 -6 -1 5.27 0.34
 6 6 1 5.38 0.33
 6 6 1 5.12 0.34
 -6 6 -1 5.44 0.33
 6 6 1 4.83 0.33
 -6 6 -1 5.32 0.35
 6 6 1 5.18 0.33
 -6 6 -1 5.78 0.35
 -6 6 -1 5.12 0.32
 6 6 1 5.13 0.31
 6 6 1 5.01 0.34
 6 6 1 5.14 0.31
 7 -6 1 10.94 0.62
 7 -6 1 10.63 0.66
 7 -6 1 10.37 0.65
 7 -6 1 10.17 0.62
 7 -6 1 10.57 0.67
 -7 -6 -1 10.21 0.61
 7 -6 1 10.8 0.68
 -7 -6 -1 10.81 0.67
 -7 -6 -1 10.52 0.65
 -7 -6 -1 10.85 0.66
 -7 -6 -1 10.75 0.66
 -7 -6 -1 10.62 0.61
 -7 6 -1 10.36 0.62
 -7 6 -1 10.76 0.65
 7 6 1 10.84 0.61
 7 6 1 10.11 0.65
 7 6 1 10.59 0.66
 7 6 1 10.74 0.66
 -7 6 -1 10.35 0.67
 -7 6 -1 10.77 0.67
 7 6 1 10.46 0.61
 8 -6 1 0.47 0.09
 8 -6 1 0.31 0.07
 8 -6 1 0.34 0.08
 -8 -6 -1 0.23 0.04
 -8 -6 -1 0.29 0.08
 8 -6 1 0.35 0.07
 -8 -6 -1 0.27 0.09
 8 -6 1 0.5 0.09
 8 -6 1 0.33 0.08
 -8 -6 -1 0.2 0.05
 8 6 1 0.19 0.07
 -8 6 -1 0.25 0.06
 8 6 1 0.26 0.07
 8 6 1 0.19 0.06
 -8 6 -1 0.43 0.1
 8 6 1 0.2 0.04
 -8 6 -1 0.42 0.08
 9 -6 1 1.76 0.16
 9 -6 1 1.65 0.16
 -9 -6 -1 1.93 0.16
 -9 -6 -1 1.62 0.13
 -9 -6 -1 1.69 0.14
 -9 -6 -1 1.55 0.12
 9 -6 1 1.95 0.15
 9 -6 1 1.87 0.15
 9 -6 1 1.88 0.14
 -9 -6 -1 1.57 0.17
 9 6 1 1.5 0.16
 -9 6 -1 1.68 0.15
 -9 6 -1 1.79 0.14
 9 6 1 1.65 0.11
 9 6 1 1.62 0.14
 -9 6 -1 1.83 0.16
 9 6 1 1.59 0.15
 9 6 1 1.67 0.12
 -9 6 -1 1.79 0.15
 10 -6 1 0.3 0.08
 10 -6 1 0.37 0.08
 -10 -6 -1 0.03 0.1
 -10 -6 -1 0.29 0.06
 -10 -6 -1 0.22 0.05
 10 -6 1 0.35 0.07
 10 -6 1 0.32 0.07
 -10 -6 -1 0.32 0.09
 -10 -6 -1 0.26 0.07
 10 6 1 0.21 0.09
 10 6 1 0.33 0.05
 -10 6 -1 0.23 0.07
 10 6 1 0.24 0.05
 -10 6 -1 0.4 0.1
 -10 6 -1 0.26 0.09
 11 -6 1 1.13 0.15
 11 -6 1 1.16 0.15
 11 -6 1 1.24 0.13
 -11 -6 -1 1.33 0.17
 -11 -6 -1 1.4 0.17
 -11 -6 -1 1.03 0.11
 -11 -6 -1 1.19 0.14
 11 -6 1 1.11 0.13
 -11 6 -1 1.26 0.17
 11 6 1 1.03 0.08
 11 6 1 1.1 0.08
 -11 6 -1 0.9 0.16
 11 6 1 1.14 0.16
 -11 6 -1 1.22 0.19
 12 -6 1 0.24 0.08
 -12 -6 -1 0.21 0.07
 12 -6 1 0.15 0.08
 12 -6 1 0.08 0.07
 -12 -6 -1 0.11 0.12
 -12 -6 -1 0.08 0.09
 12 -6 1 0.18 0.1
 12 6 1 0.17 0.13
 -12 6 -1 0.1 0.11
 -12 6 -1 0.13 0.12
 13 -6 1 0.55 0.12
 -13 -6 -1 0.68 0.15
 13 -6 1 0.51 0.09
 -13 -6 -1 0.54 0.17
 13 -6 1 0.65 0.14
 -13 -6 -1 0.51 0.11
 -13 -6 -1 0.59 0.12
 13 6 1 0.67 0.16
 -13 6 -1 0.62 0.14
 -13 6 -1 0.76 0.16
 -14 -6 -1 -0.01 0.14
 14 -6 1 0.01 0.11
 14 -6 1 -0.02 0.08
 -14 -6 -1 -0.06 0.14
 14 -6 1 -0.05 0.07
 -15 -6 -1 0.06 0.16
 -15 -6 -1 -0.23 0.15
 15 -6 1 -0.01 0.08
 -16 -7 1 -0.05 0.18
 16 -7 -1 -0.12 0.08
 -16 -7 1 -0.1 0.18
 15 -7 -1 0.25 0.08
 15 -7 -1 0.13 0.11
 -15 -7 1 0.45 0.17
 -15 -7 1 -0.03 0.17
 -14 -7 1 0.06 0.16
 14 -7 -1 0.02 0.1
 14 -7 -1 0.07 0.08
 -14 -7 1 0.26 0.08
 14 -7 -1 0.11 0.07
 14 -7 -1 0.16 0.06
 -14 -7 1 0.21 0.15
 -14 7 1 0.03 0.13
 -14 7 1 0.19 0.15
 -13 -7 1 0.49 0.14
 -13 -7 1 0.48 0.11
 13 -7 -1 0.5 0.09
 13 -7 -1 0.65 0.12
 -13 -7 1 0.71 0.16
 -13 -7 1 0.49 0.12
 13 -7 -1 0.61 0.12
 -13 7 1 0.69 0.12
 -13 7 1 0.81 0.16
 -13 7 1 0.48 0.12
 -12 -7 1 -0.06 0.06
 12 -7 -1 0.08 0.09
 -12 -7 1 0.12 0.12
 12 -7 -1 -0.02 0.06
 12 -7 -1 0.03 0.07
 12 -7 -1 0.07 0.1
 -12 -7 1 -0.12 0.12
 12 -7 -1 0.03 0.07
 -12 -7 1 0.03 0.06
 -12 7 1 0.05 0.1
 -12 7 1 -0.01 0.11
 12 7 -1 0.02 0.13
 -12 7 1 0.04 0.1
 12 7 -1 -0.17 0.09
 -11 -7 1 0.42 0.08
 -11 -7 1 0.52 0.09
 11 -7 -1 0.51 0.1
 -11 -7 1 0.58 0.14
 11 -7 -1 0.36 0.09
 11 -7 -1 0.42 0.1
 11 -7 -1 0.3 0.07
 11 -7 -1 0.38 0.08
 -11 -7 1 0.65 0.14
 11 7 -1 0.47 0.12
 -11 7 1 0.46 0.1
 -11 7 1 0.3 0.09
 -11 7 1 0.29 0.08
 -11 7 1 0.61 0.15
 11 7 -1 0.31 0.08
 10 -7 -1 -0.02 0.07
 -10 -7 1 0.08 0.04
 -10 -7 1 0.03 0.09
 -10 -7 1 0.02 0.09
 10 -7 -1 -0.05 0.06
 -10 -7 1 0.01 0.04
 10 -7 -1 0.08 0.07
 10 -7 -1 -0.04 0.06
 10 -7 -1 0.02 0.07
 10 7 -1 0.01 0.07
 10 7 -1 -0.07 0.08
 -10 7 1 0.04 0.08
 -10 7 1 0 0.06
 -10 7 1 0.07 0.08
 10 7 -1 0.16 0.08
 9 -7 -1 0.84 0.12
 -9 -7 1 0.98 0.13
 -9 -7 1 0.8 0.08
 9 -7 -1 0.96 0.12
 9 -7 -1 0.85 0.1
 -9 -7 1 0.72 0.08
 9 -7 -1 0.93 0.12
 9 -7 -1 0.91 0.12
 -9 -7 1 0.8 0.13
 9 -7 -1 0.91 0.1
 -9 7 1 0.87 0.11
 -9 7 1 0.94 0.09
 9 7 -1 0.62 0.11
 9 7 -1 0.8 0.11
 -9 7 1 0.95 0.13
 -9 7 1 0.99 0.12
 9 7 -1 0.74 0.11
 8 -7 -1 0.12 0.06
 -8 -7 1 0.12 0.03
 -8 -7 1 0.12 0.02
 -8 -7 1 0.12 0.03
 -8 -7 1 0.13 0.02
 8 -7 -1 0.09 0.08
 8 -7 -1 0.08 0.06
 8 -7 -1 0.15 0.06
 -8 -7 1 0.33 0.09
 -8 -7 1 0.24 0.08
 8 -7 -1 0.06 0.05
 8 -7 -1 0.15 0.06
 -8 7 1 0.15 0.06
 -8 7 1 0.2 0.05
 -8 7 1 0.08 0.05
 8 7 -1 0.01 0.06
 -8 7 1 0.19 0.07
 8 7 -1 0.08 0.06
 8 7 -1 0.14 0.07
 7 -7 -1 9.4 0.63
 7 -7 -1 10.01 0.63
 -7 -7 1 9.41 0.62
 -7 -7 1 9.95 0.61
 7 -7 -1 10.11 0.58
 -7 -7 1 9.67 0.57
 -7 -7 1 10.33 0.62
 7 -7 -1 9.97 0.61
 7 -7 -1 9.53 0.58
 -7 -7 1 10.1 0.62
 -7 -7 1 9.74 0.57
 7 -7 -1 9.65 0.62
 7 7 -1 9.96 0.62
 7 7 -1 10.13 0.61
 -7 7 1 9.9 0.63
 -7 7 1 10.1 0.61
 -7 7 1 10.13 0.63
 7 7 -1 9.47 0.61
 -7 7 1 9.97 0.63
 -7 7 1 9.59 0.58
 -6 -7 1 9.01 0.5
 -6 -7 1 8.77 0.55
 6 -7 -1 8.25 0.55
 6 -7 -1 8.42 0.55
 6 -7 -1 8.19 0.51
 -6 -7 1 9.02 0.54
 -6 -7 1 8.72 0.54
 6 -7 -1 8.73 0.54
 6 -7 -1 8.73 0.51
 -6 -7 1 8.76 0.54
 -6 -7 1 9.03 0.5
 6 7 -1 8.82 0.54
 -6 7 1 8.22 0.55
 6 7 -1 8.85 0.54
 -6 7 1 8.38 0.51
 -6 7 1 8.29 0.55
 -6 7 1 8.11 0.55
 6 7 -1 8.85 0.54
 -5 -7 1 1.92 0.12
 5 -7 -1 1.93 0.14
 5 -7 -1 2.13 0.14
 -5 -7 1 1.73 0.12
 -5 -7 1 1.74 0.13
 -5 -7 1 1.84 0.14
 -5 -7 1 1.86 0.14
 5 -7 -1 2.17 0.14
 -5 -7 1 1.97 0.15
 5 7 -1 1.77 0.14
 5 7 -1 1.91 0.12
 -5 7 1 2.08 0.15
 -5 7 1 1.92 0.14
 -5 7 1 2.18 0.14
 -5 7 1 2.13 0.15
 -5 7 1 2.13 0.14
 5 7 -1 1.8 0.12
 4 -7 -1 4.68 0.3
 -4 -7 1 5.13 0.31
 4 -7 -1 4.96 0.32
 4 -7 -1 4.69 0.32
 -4 7 1 4.68 0.32
 -4 7 1 4.64 0.31
 -4 7 1 4.62 0.32
 -4 7 1 4.69 0.3
 -4 7 1 4.88 0.3
 4 7 -1 5.44 0.31
 -4 7 1 4.82 0.32
 4 7 -1 5.33 0.31
 3 -7 -1 35.63 1.98
 -3 -7 1 32.72 2.14
 -3 -7 1 34.1 2.08
 -3 -7 1 34.66 1.97
 -3 -7 1 35.89 2.08
 3 -7 -1 36.09 2.08
 3 -7 -1 33.87 2.14
 3 7 -1 34.74 2.08
 3 7 -1 35.77 2.14
 -3 7 1 34.71 2.08
 -3 7 1 34.14 2.14
 3 7 -1 33.84 2.11
 3 7 -1 32.64 2.08
 3 7 -1 33.78 1.97
 3 7 -1 35.64 2.14
 -3 7 1 32.5 2.14
 -2 -7 1 7.08 0.47
 2 -7 -1 7.32 0.47
 -2 -7 1 7.78 0.43
 -2 -7 1 7.35 0.45
 2 7 -1 7.57 0.43
 -2 7 1 6.92 0.47
 2 7 -1 7.64 0.47
 2 7 -1 7.71 0.47
 -2 7 1 7.01 0.44
 -1 -7 1 50.99 2.98
 1 -7 -1 50.57 3.07
 1 -7 -1 48.78 2.83
 -1 -7 1 50.69 2.83
 -1 -7 1 50.38 3.07
 -1 7 1 47.77 3.07
 1 7 -1 49.28 3.07
 1 7 -1 49.46 3.07
 1 7 -1 48.89 2.98
 1 7 -1 45.55 2.83
 -1 7 1 49.06 3.07
 -1 7 1 50.22 2.98
 -1 7 1 50.74 2.83
 0 -7 1 3.44 0.23
 0 -7 1 3.39 0.22
 0 -7 -1 3.72 0.23
 0 -7 1 3.33 0.24
 0 -7 -1 3.59 0.22
 0 -7 -1 3.81 0.22
 0 -7 1 3.41 0.22
 0 7 1 3.62 0.23
 0 7 -1 3.35 0.22
 0 7 -1 3.35 0.24
 0 7 1 3.98 0.22
 0 7 -1 3.35 0.23
 0 7 1 3.99 0.24
 -1 -7 -1 53.53 3.18
 -1 -7 -1 50.02 3.17
 1 -7 1 49.85 2.93
 -1 -7 -1 54.02 2.93
 -1 7 -1 49.2 2.93
 -1 7 -1 49.17 2.93
 1 7 1 53.65 3.17
 1 7 1 49.68 2.93
 1 7 1 51.05 3.17
 -1 7 -1 50.75 3.08
 2 -7 1 1.86 0.14
 2 -7 1 1.83 0.15
 2 -7 1 1.85 0.15
 2 -7 1 1.89 0.15
 -2 -7 -1 1.97 0.15
 -2 -7 -1 2.24 0.15
 -2 -7 -1 2.04 0.15
 2 7 1 2.08 0.14
 -2 7 -1 2.15 0.14
 -2 7 -1 2.02 0.16
 2 7 1 2.11 0.15
 2 7 1 1.99 0.13
 3 -7 1 2.65 0.17
 -3 -7 -1 2.33 0.15
 -3 -7 -1 2.39 0.16
 -3 -7 -1 2.19 0.17
 -3 -7 -1 2.34 0.16
 3 -7 1 2.58 0.16
 3 -7 1 2.38 0.17
 -3 -7 -1 2.24 0.16
 3 -7 1 2.49 0.16
 -3 -7 -1 2.31 0.15
 3 7 1 2.25 0.15
 3 7 1 2.42 0.16
 -3 7 -1 2.57 0.16
 3 7 1 2.56 0.16
 -3 7 -1 2.16 0.17
 3 7 1 2.31 0.16
 -3 7 -1 2.57 0.17
 3 7 1 2.35 0.15
 3 7 1 2.29 0.16
 3 7 1 2.21 0.16
 -3 7 -1 2.27 0.16
 -3 7 -1 2.44 0.16
 4 -7 1 0.9 0.09
 4 -7 1 0.75 0.08
 -4 -7 -1 0.91 0.08
 -4 -7 -1 0.86 0.07
 4 -7 1 0.78 0.09
 4 -7 1 0.87 0.09
 -4 -7 -1 0.8 0.08
 4 -7 1 0.84 0.09
 -4 -7 -1 0.86 0.09
 -4 -7 -1 0.81 0.07
 -4 -7 -1 0.81 0.07
 4 7 1 0.92 0.08
 4 7 1 0.76 0.07
 4 7 1 0.78 0.07
 4 7 1 0.83 0.07
 4 7 1 0.9 0.09
 -4 7 -1 0.72 0.09
 -4 7 -1 0.9 0.09
 4 7 1 0.79 0.07
 -4 7 -1 0.89 0.08
 -4 7 -1 0.93 0.1
 4 7 1 0.8 0.07
 -4 7 -1 0.73 0.08
 5 -7 1 4.17 0.28
 -5 -7 -1 3.93 0.24
 -5 -7 -1 3.81 0.26
 5 -7 1 4.43 0.28
 5 -7 1 4.32 0.26
 5 -7 1 4.43 0.26
 -5 -7 -1 3.99 0.27
 -5 -7 -1 4.31 0.26
 -5 -7 -1 3.99 0.27
 -5 -7 -1 3.83 0.24
 -5 7 -1 4.12 0.26
 5 7 1 4.01 0.26
 5 7 1 3.9 0.24
 -5 7 -1 4.4 0.25
 -5 7 -1 4.32 0.26
 5 7 1 3.84 0.27
 5 7 1 4.04 0.24
 -5 7 -1 4.19 0.27
 5 7 1 3.94 0.26
 5 7 1 3.97 0.26
 -6 -7 -1 15.49 0.95
 -6 -7 -1 15.42 0.93
 -6 -7 -1 15.33 0.87
 -6 -7 -1 15.38 0.87
 6 -7 1 14.36 0.88
 6 -7 1 15.2 0.95
 -6 -7 -1 15.39 0.92
 6 -7 1 15.21 0.88
 6 -7 1 14.33 0.92
 6 -7 1 14.77 0.93
 6 -7 1 14.8 0.95
 6 7 1 15.47 0.87
 6 7 1 15.27 0.92
 -6 7 -1 14.61 0.92
 -6 7 -1 14.83 0.94
 6 7 1 15.29 0.93
 6 7 1 15 0.93
 6 7 1 15.85 0.94
 6 7 1 15.25 0.87
 -6 7 -1 14.55 0.95
 -7 -7 -1 4.84 0.35
 -7 -7 -1 4.89 0.34
 7 -7 1 5.57 0.32
 7 -7 1 5.62 0.33
 7 -7 1 5.69 0.35
 7 7 1 4.96 0.31
 -8 -7 -1 0.25 0.07
 -8 -7 -1 0.27 0.09
 8 -7 1 0.2 0.06
 8 -7 1 0.15 0.08
 8 -7 1 0.19 0.07
 8 -7 1 0.28 0.07
 8 -7 1 0.21 0.06
 -8 -7 -1 0.12 0.04
 -8 -7 -1 0.16 0.05
 -8 7 -1 0.16 0.05
 8 7 1 0.16 0.04
 8 7 1 0.09 0.07
 8 7 1 0.21 0.07
 -8 7 -1 0.11 0.06
 -8 7 -1 0.12 0.07
 8 7 1 0.17 0.06
 8 7 1 0.16 0.04
 9 -7 1 0.02 0.07
 -9 -7 -1 0.1 0.09
 9 -7 1 0.02 0.08
 -9 -7 -1 0 0.07
 -9 -7 -1 0.01 0.05
 9 -7 1 -0.03 0.05
 -9 -7 -1 0.04 0.05
 9 -7 1 0.02 0.06
 -9 -7 -1 0.05 0.04
 9 -7 1 0.1 0.07
 9 7 1 -0.02 0.07
 9 7 1 0.15 0.07
 -9 7 -1 0.04 0.08
 -9 7 -1 -0.01 0.08
 -9 7 -1 0.01 0.06
 9 7 1 0.03 0.03
 9 7 1 0.02 0.03
 -9 7 -1 -0.02 0.06
 10 -7 1 0.13 0.08
 -10 -7 -1 0.11 0.1
 10 -7 1 0.16 0.07
 -10 -7 -1 0.09 0.06
 -10 -7 -1 0.11 0.09
 10 -7 1 0.06 0.08
 -10 -7 -1 0.08 0.06
 10 -7 1 0.06 0.06
 -10 -7 -1 0.07 0.05
 10 -7 1 0.14 0.06
 10 7 1 0.12 0.03
 -10 7 -1 0.04 0.1
 10 7 1 0.13 0.03
 10 7 1 0.03 0.09
 -10 7 -1 0.17 0.06
 -10 7 -1 0.02 0.09
 11 -7 1 0.47 0.08
 11 -7 1 0.52 0.1
 11 -7 1 0.71 0.12
 11 -7 1 0.45 0.08
 -11 -7 -1 0.41 0.09
 -11 -7 -1 0.61 0.13
 11 -7 1 0.65 0.14
 -11 -7 -1 0.55 0.11
 -11 -7 -1 0.61 0.13
 -11 7 -1 0.31 0.11
 11 7 1 0.53 0.12
 11 7 1 0.52 0.12
 -11 7 -1 0.82 0.15
 -11 7 -1 0.73 0.16
 -12 -7 -1 0.68 0.11
 12 -7 1 0.69 0.13
 12 -7 1 0.6 0.12
 -12 -7 -1 0.78 0.17
 12 -7 1 0.73 0.16
 12 -7 1 0.52 0.1
 -12 -7 -1 0.5 0.1
 12 7 1 0.82 0.15
 12 7 1 0.59 0.1
 -12 7 -1 0.57 0.12
 -12 7 -1 0.63 0.12
 -12 7 -1 0.49 0.14
 13 -7 1 0.11 0.12
 -13 -7 -1 -0.12 0.13
 -13 -7 -1 -0.03 0.08
 13 -7 1 0.11 0.09
 13 -7 1 -0.04 0.07
 13 -7 1 0.17 0.08
 -13 -7 -1 -0.06 0.13
 13 -7 1 0.01 0.09
 -13 -7 -1 0 0.09
 13 7 1 -0.14 0.08
 13 7 1 0.1 0.15
 -13 7 -1 0.07 0.13
 -13 7 -1 0.03 0.11
 14 -7 1 -0.05 0.11
 14 -7 1 0.14 0.08
 14 -7 1 -0.02 0.08
 -14 -7 -1 -0.02 0.15
 -14 -7 -1 -0.23 0.16
 -15 -7 -1 -0.2 0.17
 15 -7 1 0.03 0.08
 15 -7 1 0.04 0.09
 -15 -7 -1 0.1 0.17
 -15 7 -1 -0.22 0.16
 -16 -8 1 0.12 0.18
 -16 -8 1 -0.28 0.19
 -16 8 1 0.01 0.18
 -15 -8 1 0.16 0.19
 15 -8 -1 -0.03 0.08
 -15 -8 1 0.12 0.16
 -14 -8 1 0 0.15
 14 -8 -1 0.07 0.08
 -14 -8 1 -0.18 0.14
 14 -8 -1 0 0.1
 14 -8 -1 0.09 0.08
 -14 8 1 0.01 0.11
 -14 8 1 -0.11 0.15
 -13 -8 1 0.1 0.07
 -13 -8 1 0.33 0.14
 13 -8 -1 0.33 0.1
 13 -8 -1 0.28 0.08
 -13 -8 1 0.25 0.07
 -13 -8 1 0.3 0.14
 13 -8 -1 0.24 0.08
 -13 8 1 0.3 0.12
 -13 8 1 0.17 0.12
 12 -8 -1 0.19 0.11
 -12 -8 1 0.37 0.15
 12 -8 -1 0.29 0.08
 12 -8 -1 0.24 0.07
 -12 -8 1 0.17 0.06
 -12 -8 1 0.24 0.06
 12 -8 -1 0.18 0.09
 -12 -8 1 0.24 0.12
 12 -8 -1 0.23 0.1
 12 8 -1 0.19 0.1
 12 8 -1 0.15 0.14
 -12 8 1 0.13 0.13
 -12 8 1 0.26 0.11
 11 -8 -1 0.22 0.07
 11 -8 -1 0.01 0.06
 11 -8 -1 0.23 0.08
 -11 -8 1 0.33 0.11
 11 -8 -1 0.19 0.09
 -11 -8 1 0.14 0.05
 11 -8 -1 0.14 0.1
 -11 -8 1 0.11 0.05
 -11 -8 1 0.22 0.11
 -11 8 1 0.08 0.09
 11 8 -1 0.08 0.08
 -11 8 1 0.34 0.11
 11 8 -1 0.12 0.11
 10 -8 -1 0.79 0.1
 10 -8 -1 0.75 0.13
 -10 -8 1 0.96 0.13
 -10 -8 1 0.81 0.13
 10 -8 -1 1.06 0.13
 -10 -8 1 0.68 0.08
 10 -8 -1 0.71 0.13
 -10 -8 1 0.81 0.08
 10 -8 -1 0.65 0.11
 -10 8 1 0.79 0.12
 10 8 -1 0.74 0.12
 -10 8 1 0.57 0.14
 10 8 -1 0.87 0.14
 -10 8 1 0.65 0.12
 10 8 -1 0.55 0.12
 -9 -8 1 0.37 0.09
 -9 -8 1 0.3 0.09
 -9 -8 1 0.2 0.04
 -9 -8 1 0.31 0.04
 -9 -8 1 0.24 0.03
 9 -8 -1 0.39 0.08
 9 -8 -1 0.29 0.06
 9 -8 -1 0.19 0.06
 9 -8 -1 0.28 0.09
 9 -8 -1 0.28 0.07
 9 -8 -1 0.31 0.07
 -9 -8 1 0.21 0.04
 9 8 -1 0.25 0.07
 -9 8 1 0.27 0.06
 9 8 -1 0.21 0.07
 9 8 -1 0.28 0.08
 -9 8 1 0.29 0.06
 -9 8 1 0.22 0.08
 -9 8 1 0.29 0.08
 8 -8 -1 0.06 0.06
 -8 -8 1 0 0.07
 8 -8 -1 0.09 0.06
 -8 -8 1 0.07 0.03
 8 -8 -1 0.05 0.06
 8 -8 -1 0.13 0.06
 8 -8 -1 0.17 0.08
 -8 -8 1 0.09 0.02
 -8 -8 1 0.08 0.03
 8 -8 -1 0.04 0.07
 -8 -8 1 0.03 0.03
 -8 -8 1 0.12 0.09
 -8 8 1 0.03 0.08
 8 8 -1 0.14 0.06
 -8 8 1 0.03 0.07
 8 8 -1 0.05 0.06
 -8 8 1 0.12 0.05
 8 8 -1 0.06 0.06
 -8 8 1 0.1 0.05
 -7 -8 1 22.85 1.37
 7 -8 -1 22.2 1.4
 -7 -8 1 22.94 1.39
 7 -8 -1 21.36 1.29
 -7 -8 1 22.78 1.28
 -7 -8 1 23.54 1.39
 -7 -8 1 23.02 1.36
 7 -8 -1 21.33 1.35
 -7 8 1 21.57 1.35
 -7 8 1 21.47 1.4
 7 8 -1 22.85 1.37
 -7 8 1 20.93 1.38
 7 8 -1 22.92 1.36
 -7 8 1 21.67 1.4
 -6 -8 1 1.71 0.13
 6 -8 -1 1.29 0.13
 -6 -8 1 1.49 0.14
 -6 -8 1 1.57 0.09
 6 -8 -1 1.39 0.13
 6 -8 -1 1.34 0.12
 6 -8 -1 1.46 0.12
 -6 -8 1 1.64 0.13
 -6 -8 1 1.38 0.1
 6 -8 -1 1.18 0.13
 -6 8 1 1.3 0.13
 -6 8 1 1.43 0.13
 6 8 -1 1.33 0.12
 -6 8 1 1.41 0.12
 -6 8 1 1.37 0.13
 6 8 -1 1.38 0.13
 6 8 -1 1.39 0.09
 -6 8 1 1.32 0.12
 6 8 -1 1.37 0.09
 6 8 -1 1.62 0.13
 5 -8 -1 4.72 0.32
 -5 -8 1 5.01 0.3
 5 -8 -1 5 0.29
 -5 -8 1 4.96 0.28
 5 -8 -1 4.67 0.3
 -5 -8 1 4.74 0.31
 5 -8 -1 4.54 0.29
 5 -8 -1 5.02 0.32
 5 8 -1 4.77 0.31
 -5 8 1 4.54 0.31
 5 8 -1 4.87 0.28
 5 8 -1 4.72 0.31
 -5 8 1 4.59 0.31
 -5 8 1 4.54 0.29
 -5 8 1 4.56 0.29
 -5 8 1 4.92 0.32
 -5 8 1 5.03 0.32
 5 8 -1 4.7 0.31
 5 8 -1 4.52 0.28
 4 -8 -1 1.49 0.12
 4 -8 -1 1.4 0.11
 4 -8 -1 1.5 0.11
 -4 -8 1 1.27 0.11
 4 -8 -1 1.37 0.11
 4 -8 -1 1.47 0.12
 -4 -8 1 1.33 0.1
 -4 8 1 1.42 0.12
 -4 8 1 1.46 0.11
 4 8 -1 1.27 0.09
 4 8 -1 1.31 0.1
 4 8 -1 1.4 0.1
 4 8 -1 1.32 0.09
 -4 8 1 1.44 0.11
 4 8 -1 1.33 0.11
 4 8 -1 1.33 0.11
 -4 8 1 1.48 0.12
 -3 -8 1 0.63 0.06
 -3 -8 1 0.61 0.06
 3 -8 -1 0.45 0.08
 -3 -8 1 0.53 0.07
 3 -8 -1 0.63 0.08
 3 -8 -1 0.5 0.08
 -3 -8 1 0.65 0.07
 3 8 -1 0.68 0.06
 3 8 -1 0.63 0.06
 -3 8 1 0.56 0.08
 -3 8 1 0.48 0.08
 3 8 -1 0.78 0.08
 -3 8 1 0.48 0.08
 3 8 -1 0.62 0.07
 3 8 -1 0.55 0.06
 -3 8 1 0.42 0.07
 -3 8 1 0.66 0.07
 -2 -8 1 3.02 0.2
 -2 -8 1 3.08 0.2
 -2 -8 1 2.95 0.19
 2 -8 -1 2.6 0.19
 2 8 -1 2.75 0.18
 -2 8 1 2.54 0.2
 2 8 -1 3.09 0.19
 -1 -8 1 299.5 17.6
 1 -8 -1 289.81 18.13
 1 -8 -1 279.58 16.72
 1 -8 -1 309.45 16.74
 1 -8 -1 297.29 17.59
 -1 -8 1 293.71 18.14
 -1 8 1 277.18 16.73
 1 8 -1 307.01 18.16
 -1 8 1 279.35 18.14
 1 8 -1 291.43 18.13
 0 -8 -1 0.59 0.1
 0 -8 -1 0.66 0.08
 0 -8 -1 0.64 0.08
 0 -8 -1 0.76 0.1
 0 -8 -1 0.66 0.09
 0 -8 1 0.6 0.08
 0 8 -1 0.41 0.09
 0 8 1 0.78 0.1
 0 8 1 0.71 0.09
 0 8 -1 0.46 0.09
 0 8 1 0.81 0.09
 0 8 1 0.58 0.09
 0 8 -1 0.47 0.08
 0 8 1 0.67 0.09
 1 -8 1 84.88 5.15
 -1 -8 -1 84.78 5.15
 -1 -8 -1 85.08 5.15
 1 -8 1 80.99 4.75
 -1 8 -1 82.35 5.15
 -1 8 -1 81.95 4.75
 1 8 1 83.06 4.75
 1 8 1 76.99 5.15
 1 8 1 83.72 4.75
 -1 8 -1 86.23 5
 2 -8 1 0.18 0.05
 -2 -8 -1 0.13 0.04
 2 -8 1 0.16 0.05
 -2 -8 -1 0.28 0.06
 -2 -8 -1 0.16 0.04
 2 -8 1 0.18 0.04
 -2 -8 -1 0.21 0.06
 2 8 1 0.38 0.07
 2 8 1 0.19 0.04
 -2 8 -1 0.13 0.05
 2 8 1 0.27 0.06
 -2 8 -1 0.18 0.06
 2 8 1 0.18 0.04
 -2 8 -1 0.2 0.06
 -2 8 -1 0.35 0.07
 -2 8 -1 0.18 0.05
 -3 -8 -1 6 0.39
 -3 -8 -1 6.19 0.38
 3 -8 1 5.96 0.4
 3 -8 1 6.14 0.37
 3 -8 1 6.36 0.4
 3 -8 1 5.67 0.38
 -3 -8 -1 6.29 0.39
 -3 -8 -1 6.35 0.36
 3 8 1 6.62 0.39
 3 8 1 6.41 0.38
 3 8 1 6.16 0.36
 -3 8 -1 6.57 0.37
 -3 8 -1 5.61 0.37
 -3 8 -1 6.11 0.38
 -3 8 -1 6.08 0.4
 -3 8 -1 6.05 0.4
 4 -8 1 0.44 0.08
 -4 -8 -1 0.37 0.07
 -4 -8 -1 0.42 0.06
 4 -8 1 0.51 0.08
 4 -8 1 0.36 0.08
 -4 -8 -1 0.42 0.06
 -4 -8 -1 0.46 0.06
 -4 -8 -1 0.46 0.07
 4 -8 1 0.57 0.07
 4 -8 1 0.61 0.08
 -4 -8 -1 0.34 0.08
 4 8 1 0.33 0.06
 4 8 1 0.37 0.06
 4 8 1 0.58 0.07
 -4 8 -1 0.54 0.07
 4 8 1 0.44 0.06
 4 8 1 0.33 0.07
 4 8 1 0.53 0.06
 -4 8 -1 0.56 0.08
 4 8 1 0.42 0.06
 -4 8 -1 0.45 0.09
 -4 8 -1 0.5 0.07
 -4 8 -1 0.56 0.08
 5 -8 1 2.89 0.22
 5 -8 1 3.16 0.22
 -5 -8 -1 3.12 0.19
 5 -8 1 3.1 0.21
 5 -8 1 3.36 0.2
 -5 -8 -1 2.96 0.21
 5 -8 1 3 0.2
 -5 -8 -1 3.07 0.19
 -5 -8 -1 2.87 0.2
 -5 -8 -1 2.75 0.2
 5 -8 1 3.2 0.2
 5 8 1 3 0.19
 5 8 1 2.81 0.21
 -5 8 -1 3.05 0.2
 5 8 1 2.98 0.21
 -5 8 -1 3.13 0.21
 5 8 1 3.08 0.2
 5 8 1 3.1 0.19
 -5 8 -1 3.08 0.2
 5 8 1 2.99 0.2
 5 8 1 3.01 0.2
 -5 8 -1 3.22 0.2
 -5 8 -1 2.95 0.22
 6 -8 1 5.51 0.36
 6 -8 1 5.15 0.34
 -6 -8 -1 5.38 0.35
 -6 -8 -1 5.05 0.32
 6 -8 1 5.13 0.36
 6 -8 1 5.61 0.34
 6 -8 1 5.49 0.36
 -6 -8 -1 5.42 0.32
 -6 -8 -1 5.88 0.36
 6 8 1 5.73 0.35
 6 8 1 5.64 0.32
 -6 8 -1 4.92 0.34
 6 8 1 5.68 0.34
 6 8 1 5.4 0.34
 6 8 1 5.74 0.35
 6 8 1 5.58 0.35
 -6 8 -1 5.53 0.36
 -6 8 -1 5.4 0.36
 -6 8 -1 5.37 0.35
 6 8 1 5.65 0.32
 -6 8 -1 5.28 0.34
 7 -8 1 4.97 0.33
 7 -8 1 4.74 0.34
 7 -8 1 4.47 0.31
 -7 -8 -1 5.28 0.33
 -7 -8 -1 5.35 0.3
 -7 -8 -1 4.99 0.32
 -7 -8 -1 5.02 0.32
 7 -8 1 4.64 0.31
 7 -8 1 4.74 0.33
 -7 -8 -1 4.92 0.29
 -7 8 -1 4.53 0.31
 -7 8 -1 4.54 0.32
 -7 8 -1 4.97 0.34
 7 8 1 5.12 0.32
 -7 8 -1 4.67 0.33
 7 8 1 5.25 0.29
 7 8 1 5.4 0.33
 7 8 1 5.06 0.29
 8 -8 1 0.14 0.07
 -8 -8 -1 0.05 0.05
 8 -8 1 0.03 0.06
 -8 -8 -1 0.13 0.07
 8 -8 1 0.06 0.07
 -8 -8 -1 0.09 0.04
 -8 -8 -1 0.09 0.06
 8 -8 1 0.2 0.07
 8 -8 1 0.14 0.06
 -8 -8 -1 0.02 0.1
 8 -8 1 0.22 0.06
 -8 8 -1 0.14 0.08
 8 8 1 0.01 0.07
 -8 8 -1 0.15 0.06
 8 8 1 0.04 0.03
 8 8 1 0.11 0.04
 -8 8 -1 0.01 0.05
 8 8 1 0.08 0.06
 9 -8 1 0.04 0.06
 9 -8 1 0.07 0.06
 9 -8 1 0.05 0.07
 9 -8 1 0.04 0.08
 -9 -8 -1 0.08 0.05
 9 -8 1 0.05 0.06
 -9 -8 -1 0.15 0.1
 -9 -8 -1 0.06 0.05
 -9 -8 -1 0.01 0.07
 -9 -8 -1 -0.01 0.04
 9 8 1 -0.03 0.07
 -9 8 -1 0.05 0.09
 9 8 1 0.1 0.06
 -9 8 -1 0.02 0.06
 9 8 1 0.07 0.03
 9 8 1 0.09 0.03
 -9 8 -1 0.11 0.08
 9 8 1 0.05 0.08
 -10 -8 -1 0.3 0.09
 -10 -8 -1 0.13 0.11
 10 -8 1 0.29 0.07
 -10 -8 -1 0.23 0.07
 -10 -8 -1 0.31 0.06
 10 -8 1 0.2 0.07
 10 -8 1 0.29 0.09
 -10 -8 -1 0.24 0.05
 10 -8 1 0.24 0.09
 10 -8 1 0.26 0.07
 10 8 1 0.3 0.05
 -10 8 -1 0.26 0.09
 10 8 1 0.25 0.07
 -10 8 -1 0.35 0.11
 -10 8 -1 0.14 0.1
 10 8 1 0.35 0.11
 10 8 1 0.41 0.05
 11 -8 1 0.6 0.13
 -11 -8 -1 0.44 0.09
 11 -8 1 0.67 0.13
 11 -8 1 0.87 0.15
 11 -8 1 0.82 0.15
 -11 -8 -1 0.76 0.15
 -11 -8 -1 0.42 0.1
 -11 -8 -1 0.71 0.15
 11 -8 1 0.76 0.12
 11 8 1 0.47 0.09
 -11 8 -1 0.87 0.17
 -11 8 -1 0.87 0.15
 11 8 1 0.55 0.13
 -11 8 -1 0.69 0.12
 12 -8 1 0.86 0.14
 12 -8 1 0.97 0.14
 12 -8 1 1.1 0.17
 -12 -8 -1 1.21 0.18
 12 -8 1 1.04 0.18
 -12 -8 -1 1.1 0.18
 12 -8 1 1.03 0.15
 -12 -8 -1 0.79 0.12
 -12 -8 -1 0.74 0.16
 -12 8 -1 0.85 0.14
 -12 8 -1 0.87 0.15
 -12 8 -1 1.14 0.19
 12 8 1 0.81 0.15
 12 8 1 1.07 0.18
 13 -8 1 0 0.12
 13 -8 1 0.06 0.1
 -13 -8 -1 0.05 0.16
 13 -8 1 0.06 0.09
 -13 -8 -1 -0.14 0.09
 -13 -8 -1 -0.04 0.07
 13 -8 1 -0.13 0.08
 13 -8 1 0.06 0.08
 -13 -8 -1 0.09 0.13
 -13 8 -1 0.09 0.12
 13 8 1 0.02 0.09
 13 8 1 0.16 0.16
 -13 8 -1 0.08 0.12
 14 -8 1 -0.03 0.08
 -14 -8 -1 -0.1 0.15
 -14 -8 -1 0.07 0.14
 14 -8 1 0.12 0.09
 -14 8 -1 0.01 0.13
 15 -8 1 0.12 0.09
 -15 -8 -1 -0.22 0.18
 -15 -8 -1 0.08 0.17
 15 -8 1 -0.04 0.09
 -15 -9 1 0.08 0.16
 -15 -9 1 0.34 0.17
 15 -9 -1 0.23 0.09
 15 -9 -1 0.18 0.08
 -15 9 1 0.12 0.18
 14 -9 -1 0.13 0.08
 -14 -9 1 0.22 0.15
 -14 -9 1 -0.01 0.14
 14 -9 -1 0.09 0.08
 -14 9 1 0.16 0.14
 -14 9 1 0.21 0.12
 -13 -9 1 0.1 0.06
 13 -9 -1 0.01 0.1
 13 -9 -1 0.12 0.11
 -13 -9 1 0.18 0.15
 13 -9 -1 0.02 0.08
 13 -9 -1 -0.04 0.08
 -13 -9 1 0.29 0.14
 -13 9 1 0.04 0.1
 -13 9 1 0.12 0.12
 -12 -9 1 0.58 0.1
 12 -9 -1 0.93 0.16
 -12 -9 1 0.82 0.17
 -12 -9 1 0.43 0.07
 12 -9 -1 0.55 0.13
 12 -9 -1 0.68 0.15
 12 -9 -1 0.79 0.12
 -12 -9 1 0.79 0.16
 -12 9 1 0.66 0.14
 12 9 -1 0.59 0.11
 -12 9 1 0.5 0.11
 12 9 -1 0.69 0.15
 -12 9 1 0.65 0.12
 -11 -9 1 0.17 0.11
 11 -9 -1 0.31 0.08
 11 -9 -1 0.32 0.09
 11 -9 -1 0.26 0.07
 11 -9 -1 0.27 0.1
 11 -9 -1 0.38 0.1
 -11 -9 1 0.17 0.05
 -11 -9 1 0.36 0.11
 -11 9 1 0.55 0.12
 11 9 -1 0.3 0.09
 -11 9 1 0.35 0.09
 -11 9 1 0.32 0.1
 11 9 -1 0.43 0.12
 10 -9 -1 0.93 0.11
 -10 -9 1 0.94 0.14
 10 -9 -1 0.77 0.14
 10 -9 -1 0.88 0.14
 -10 -9 1 0.91 0.09
 -10 -9 1 1.19 0.14
 10 -9 -1 0.82 0.12
 -10 -9 1 0.99 0.09
 10 -9 -1 0.69 0.14
 10 9 -1 0.82 0.14
 -10 9 1 0.9 0.14
 10 9 -1 1.03 0.14
 -10 9 1 0.65 0.12
 -10 9 1 0.81 0.13
 -10 9 1 0.66 0.14
 9 -9 -1 1.15 0.13
 -9 -9 1 1.02 0.09
 9 -9 -1 1.08 0.12
 -9 -9 1 1.11 0.08
 9 -9 -1 0.95 0.12
 9 -9 -1 1.31 0.15
 -9 -9 1 0.94 0.09
 9 -9 -1 1.2 0.13
 9 -9 -1 1.16 0.14
 -9 -9 1 1.1 0.13
 -9 9 1 0.95 0.12
 9 9 -1 1.05 0.13
 9 9 -1 0.76 0.13
 9 9 -1 1.01 0.13
 -9 9 1 0.81 0.11
 -9 9 1 1.09 0.12
 -8 -9 1 0.11 0.08
 -8 -9 1 0.08 0.03
 8 -9 -1 0.03 0.08
 -8 -9 1 0.07 0.04
 8 -9 -1 0.1 0.06
 -8 -9 1 -0.03 0.06
 8 -9 -1 0.06 0.06
 8 -9 -1 0.11 0.06
 8 -9 -1 0 0.06
 -8 -9 1 0.11 0.08
 -8 -9 1 0.11 0.03
 8 -9 -1 0.01 0.07
 8 9 -1 0.05 0.06
 -8 9 1 0.01 0.06
 8 9 -1 0.18 0.07
 -8 9 1 0.1 0.05
 -8 9 1 0.08 0.06
 -8 9 1 -0.06 0.08
 8 9 -1 -0.05 0.06
 -7 -9 1 -0.02 0.03
 -7 -9 1 0.05 0.06
 7 -9 -1 -0.03 0.06
 7 -9 -1 0.12 0.06
 7 -9 -1 0.09 0.06
 -7 -9 1 0.05 0.07
 -7 -9 1 0.13 0.09
 7 -9 -1 0.05 0.07
 -7 -9 1 0.01 0.03
 -7 -9 1 0.02 0.04
 7 -9 -1 0.02 0.06
 -7 9 1 0.08 0.06
 -7 9 1 0.06 0.05
 7 9 -1 0.03 0.07
 7 9 -1 0.13 0.06
 -7 9 1 0.02 0.07
 7 9 -1 0.03 0.02
 7 9 -1 -0.03 0.06
 -7 9 1 0.09 0.06
 -6 -9 1 8.26 0.48
 6 -9 -1 8.76 0.54
 6 -9 -1 7.55 0.49
 -6 -9 1 7.94 0.52
 -6 -9 1 8.57 0.52
 6 -9 -1 8.26 0.53
 6 -9 -1 8.59 0.49
 6 -9 -1 8.23 0.52
 6 9 -1 8.19 0.48
 6 9 -1 8.13 0.48
 -6 9 1 8.72 0.52
 -6 9 1 8.63 0.49
 6 9 -1 7.93 0.52
 6 9 -1 8.05 0.52
 -6 9 1 8.17 0.53
 -6 9 1 8.57 0.53
 6 9 -1 7.94 0.52
 -6 9 1 8.04 0.49
 -6 9 1 8.37 0.54
 5 -9 -1 2.43 0.2
 5 -9 -1 2.85 0.18
 5 -9 -1 2.47 0.18
 -5 -9 1 2.91 0.17
 -5 -9 1 2.68 0.19
 -5 -9 1 2.8 0.19
 -5 -9 1 2.88 0.18
 5 -9 -1 2.56 0.19
 5 -9 -1 2.6 0.2
 -5 9 1 2.58 0.19
 5 9 -1 2.84 0.17
 5 9 -1 2.74 0.19
 -5 9 1 2.48 0.2
 -5 9 1 2.43 0.19
 5 9 -1 2.75 0.17
 5 9 -1 2.66 0.19
 -5 9 1 2.47 0.19
 5 9 -1 2.8 0.19
 5 9 -1 2.77 0.17
 5 9 -1 2.85 0.17
 4 -9 -1 0.54 0.08
 -4 -9 1 0.7 0.06
 -4 -9 1 0.64 0.07
 4 -9 -1 0.43 0.09
 -4 -9 1 0.62 0.08
 -4 -9 1 0.7 0.06
 4 -9 -1 0.5 0.09
 -4 -9 1 0.67 0.07
 4 -9 -1 0.61 0.09
 -4 9 1 0.52 0.08
 4 9 -1 0.6 0.07
 4 9 -1 0.69 0.06
 4 9 -1 0.72 0.06
 -4 9 1 0.57 0.09
 -4 9 1 0.68 0.08
 -4 9 1 0.5 0.08
 4 9 -1 0.69 0.06
 4 9 -1 0.68 0.09
 4 9 -1 0.79 0.07
 4 9 -1 0.68 0.06
 -4 9 1 0.52 0.08
 -3 -9 1 0.89 0.09
 -3 -9 1 1.01 0.08
 -3 -9 1 0.92 0.07
 3 -9 -1 0.95 0.09
 -3 -9 1 0.91 0.09
 3 -9 -1 0.77 0.1
 3 -9 -1 1.05 0.09
 3 -9 -1 0.84 0.09
 -3 -9 1 0.87 0.08
 -3 -9 1 1.03 0.08
 3 9 -1 0.9 0.07
 -3 9 1 0.82 0.08
 3 9 -1 0.87 0.08
 -3 9 1 0.97 0.09
 -3 9 1 0.87 0.1
 3 9 -1 0.85 0.08
 -3 9 1 0.84 0.1
 3 9 -1 0.96 0.08
 2 -9 -1 6.79 0.4
 -2 -9 1 6.66 0.4
 2 9 -1 5.91 0.41
 2 9 -1 6.24 0.41
 1 -9 -1 25.5 1.62
 -1 -9 1 24.71 1.57
 1 -9 -1 27.45 1.49
 1 -9 -1 24.68 1.57
 1 -9 -1 24.23 1.49
 -1 -9 1 26.97 1.62
 1 9 -1 25.45 1.57
 -1 9 1 25.03 1.49
 -1 9 1 27.22 1.57
 -1 9 1 26.55 1.49
 1 9 -1 25.31 1.62
 1 9 -1 27.43 1.49
 -1 9 1 26.52 1.62
 0 -9 -1 4.73 0.29
 0 -9 1 4.57 0.32
 0 -9 -1 4.98 0.29
 0 9 1 4.63 0.31
 0 9 -1 4.64 0.31
 0 9 1 5.09 0.32
 0 9 -1 4.6 0.29
 -1 -9 -1 34.5 1.95
 -1 -9 -1 33.94 2.11
 1 -9 1 34.56 1.95
 -1 9 -1 33.54 2.12
 1 9 1 33.5 2.11
 1 9 1 35.06 1.95
 1 9 1 33.27 2.05
 -1 9 -1 35.03 1.95
 -1 9 -1 31.75 2.05
 -2 -9 -1 19.49 1.18
 2 -9 1 20.28 1.13
 -2 -9 -1 19.28 1.22
 -2 -9 -1 18.39 1.12
 2 9 1 18.46 1.12
 -2 9 -1 20.64 1.13
 -2 9 -1 19.4 1.18
 -2 9 -1 20.87 1.22
 -2 9 -1 18.6 1.13
 -3 -9 -1 7.74 0.51
 3 -9 1 8.38 0.48
 -3 -9 -1 7.9 0.51
 3 -9 1 8.12 0.52
 -3 -9 -1 8.35 0.5
 3 -9 1 7.76 0.52
 3 9 1 8.04 0.5
 3 9 1 7.64 0.51
 3 9 1 8.59 0.47
 3 9 1 8.63 0.5
 -3 9 -1 7.99 0.52
 -3 9 -1 8.2 0.5
 4 -9 1 5.85 0.37
 -4 -9 -1 5.66 0.36
 4 -9 1 5.56 0.34
 -4 -9 -1 5.51 0.36
 -4 -9 -1 5.55 0.36
 4 -9 1 5.97 0.34
 -4 -9 -1 5.36 0.33
 -4 -9 -1 5.24 0.33
 -4 -9 -1 5.3 0.35
 -4 9 -1 5.75 0.35
 4 9 1 5.27 0.33
 4 9 1 5.59 0.33
 4 9 1 5.54 0.36
 4 9 1 5.65 0.36
 -4 9 -1 5.63 0.34
 -4 9 -1 5.8 0.37
 -4 9 -1 5.7 0.34
 4 9 1 5.51 0.35
 -5 -9 -1 5.24 0.33
 5 -9 1 4.67 0.32
 5 -9 1 5 0.31
 -5 -9 -1 5.31 0.3
 -5 -9 -1 5.01 0.33
 5 -9 1 4.87 0.34
 -5 -9 -1 5.25 0.33
 -5 -9 -1 5.39 0.3
 -5 -9 -1 5.19 0.33
 5 9 1 4.71 0.32
 5 9 1 5.32 0.3
 5 9 1 5.27 0.3
 -5 9 -1 4.81 0.34
 5 9 1 5.11 0.33
 -5 9 -1 4.59 0.31
 6 -9 1 9.73 0.61
 6 -9 1 9.8 0.56
 -6 -9 -1 9.31 0.55
 6 -9 1 9.77 0.58
 -6 -9 -1 9.4 0.59
 6 -9 1 9.82 0.59
 -6 -9 -1 9.47 0.58
 -6 -9 -1 9.01 0.59
 6 -9 1 9.67 0.56
 -6 -9 -1 9.43 0.59
 6 9 1 8.79 0.59
 -6 9 -1 9.6 0.6
 6 9 1 9.13 0.55
 -6 9 -1 9.6 0.56
 -6 9 -1 9.53 0.6
 6 9 1 8.97 0.55
 -6 9 -1 10 0.61
 6 9 1 9.05 0.59
 6 9 1 9.14 0.59
 -6 9 -1 9.69 0.56
 6 9 1 9.05 0.58
 7 -9 1 7.58 0.47
 7 -9 1 7.23 0.46
 -7 -9 -1 7.25 0.42
 7 -9 1 7.03 0.45
 -7 -9 -1 7.09 0.45
 -7 -9 -1 7.29 0.47
 7 -9 1 7.32 0.44
 7 -9 1 7.2 0.44
 -7 -9 -1 7.14 0.43
 -7 -9 -1 7.03 0.46
 -7 9 -1 7.23 0.46
 -7 9 -1 7.2 0.47
 7 9 1 7.1 0.42
 -7 9 -1 7.54 0.48
 7 9 1 6.9 0.46
 -7 9 -1 6.67 0.44
 7 9 1 7.05 0.46
 -7 9 -1 7.59 0.47
 7 9 1 7.48 0.42
 -7 9 -1 7.45 0.44
 8 -9 1 1.53 0.14
 -8 -9 -1 1.41 0.14
 8 -9 1 1.32 0.14
 8 -9 1 1.47 0.15
 8 -9 1 1.49 0.15
 8 -9 1 1.63 0.16
 8 -9 1 1.51 0.13
 -8 -9 -1 1.42 0.17
 -8 -9 -1 1.59 0.14
 -8 -9 -1 1.54 0.13
 -8 -9 -1 1.49 0.11
 -8 9 -1 1.25 0.13
 8 9 1 1.5 0.14
 -8 9 -1 1.45 0.15
 -8 9 -1 1.6 0.16
 -8 9 -1 1.53 0.13
 -8 9 -1 1.54 0.13
 8 9 1 1.57 0.14
 8 9 1 1.55 0.11
 8 9 1 1.57 0.11
 -9 -9 -1 0.27 0.1
 9 -9 1 0.12 0.08
 -9 -9 -1 0.15 0.05
 -9 -9 -1 0.15 0.08
 -9 -9 -1 0.15 0.06
 9 -9 1 0.1 0.07
 9 -9 1 0.09 0.07
 9 -9 1 0.13 0.09
 9 -9 1 0.05 0.07
 -9 -9 -1 0.19 0.04
 -9 9 -1 0.04 0.09
 9 9 1 0.21 0.09
 9 9 1 0.22 0.07
 -9 9 -1 0.03 0.06
 -9 9 -1 0.15 0.09
 9 9 1 0.12 0.04
 9 9 1 0.26 0.05
 -10 -9 -1 0.02 0.09
 10 -9 1 0.07 0.08
 10 -9 1 0.03 0.09
 10 -9 1 0.06 0.07
 10 -9 1 0.05 0.07
 -10 -9 -1 0.32 0.13
 -10 -9 -1 0.01 0.06
 10 -9 1 0.03 0.07
 -10 -9 -1 0.09 0.06
 10 9 1 0.1 0.03
 10 9 1 0.11 0.1
 -10 9 -1 0.18 0.09
 10 9 1 0.05 0.07
 10 9 1 0.14 0.03
 -10 9 -1 0.12 0.1
 -11 -9 -1 0.33 0.08
 -11 -9 -1 0.41 0.11
 11 -9 1 0.44 0.11
 -11 -9 -1 0.35 0.13
 11 -9 1 0.24 0.08
 11 -9 1 0.27 0.08
 -11 -9 -1 0.39 0.07
 11 -9 1 0.31 0.1
 11 -9 1 0.25 0.09
 11 9 1 0.3 0.09
 -11 9 -1 0.38 0.11
 -11 9 -1 0.4 0.11
 11 9 1 0.39 0.12
 -11 9 -1 0.3 0.12
 12 -9 1 0.05 0.08
 -12 -9 -1 0.13 0.11
 12 -9 1 0.16 0.08
 -12 -9 -1 -0.02 0.14
 12 -9 1 0.14 0.11
 12 -9 1 -0.08 0.1
 -12 -9 -1 -0.01 0.07
 -12 -9 -1 -0.01 0.08
 12 -9 1 0.04 0.09
 12 9 1 -0.18 0.13
 -12 9 -1 0.28 0.13
 -12 9 -1 0.25 0.13
 12 9 1 -0.03 0.09
 -12 9 -1 0.11 0.11
 13 -9 1 0.16 0.12
 -13 -9 -1 -0.13 0.09
 13 -9 1 -0.05 0.08
 -13 -9 -1 0.12 0.07
 -13 -9 -1 0.09 0.15
 -13 -9 -1 0.13 0.13
 13 -9 1 -0.04 0.08
 13 9 1 -0.04 0.09
 -13 9 -1 0.03 0.14
 -13 9 -1 -0.01 0.12
 13 9 1 -0.08 0.16
 -14 -9 -1 0.06 0.15
 14 -9 1 0.1 0.09
 -14 -9 -1 0.11 0.15
 14 -9 1 -0.16 0.09
 -14 9 -1 0.04 0.16
 -15 -9 -1 -0.15 0.16
 -15 -9 -1 0.08 0.18
 15 -9 1 0.05 0.09
 15 -9 1 -0.03 0.1
 15 -10 -1 0.07 0.09
 -15 -10 1 0.02 0.16
 -15 -10 1 -0.08 0.16
 14 -10 -1 0.08 0.09
 -14 -10 1 -0.01 0.14
 14 -10 -1 -0.03 0.09
 -14 -10 1 0.07 0.16
 -14 10 1 0.27 0.13
 -14 10 1 0.08 0.15
 13 -10 -1 0 0.08
 13 -10 -1 -0.1 0.11
 -13 -10 1 -0.25 0.12
 13 -10 -1 0.01 0.11
 -13 -10 1 -0.09 0.13
 13 -10 -1 0.08 0.08
 -13 10 1 0 0.11
 13 10 -1 -0.13 0.1
 -13 10 1 0.01 0.13
 -12 -10 1 0.44 0.1
 -12 -10 1 0.56 0.13
 12 -10 -1 0.47 0.11
 12 -10 -1 0.3 0.09
 12 -10 -1 0.41 0.12
 -12 -10 1 0.36 0.13
 12 -10 -1 0.37 0.11
 -12 10 1 0.61 0.14
 -12 10 1 0.45 0.12
 -12 10 1 0.34 0.11
 12 10 -1 0.33 0.14
 -11 -10 1 0.17 0.13
 -11 -10 1 0.04 0.11
 11 -10 -1 0.12 0.09
 -11 -10 1 0.08 0.05
 11 -10 -1 0 0.07
 -11 -10 1 0.07 0.05
 11 -10 -1 0.04 0.1
 11 -10 -1 -0.03 0.07
 11 -10 -1 0.08 0.09
 -11 10 1 0.15 0.1
 11 10 -1 0.16 0.09
 -11 10 1 -0.01 0.09
 11 10 -1 0.19 0.12
 -11 10 1 0.27 0.1
 -10 -10 1 0.65 0.13
 -10 -10 1 0.5 0.1
 10 -10 -1 0.45 0.09
 -10 -10 1 0.42 0.08
 10 -10 -1 0.39 0.08
 -10 -10 1 0.57 0.08
 -10 -10 1 0.54 0.05
 10 -10 -1 0.51 0.1
 10 -10 -1 0.45 0.1
 10 -10 -1 0.48 0.1
 10 10 -1 0.74 0.13
 10 10 -1 0.56 0.12
 -10 10 1 0.5 0.1
 -10 10 1 0.37 0.09
 9 -10 -1 0.06 0.08
 -9 -10 1 0.1 0.04
 -9 -10 1 0.11 0.04
 -9 -10 1 0.03 0.03
 -9 -10 1 0.13 0.08
 9 -10 -1 0.07 0.06
 9 -10 -1 -0.07 0.08
 9 -10 -1 0.09 0.06
 -9 -10 1 0.11 0.1
 9 -10 -1 0.06 0.08
 -9 10 1 -0.08 0.07
 9 10 -1 0.12 0.08
 -9 10 1 0.2 0.07
 -9 10 1 0.12 0.08
 -9 10 1 0.08 0.06
 9 10 -1 0.06 0.07
 9 10 -1 0.16 0.08
 -8 -10 1 0.03 0.04
 8 -10 -1 0.04 0.06
 -8 -10 1 0.07 0.03
 8 -10 -1 0.04 0.07
 8 -10 -1 0.09 0.08
 -8 -10 1 0.05 0.04
 -8 -10 1 -0.01 0.06
 8 -10 -1 -0.06 0.06
 -8 -10 1 0 0.08
 8 -10 -1 0.03 0.06
 8 -10 -1 0.01 0.06
 8 10 -1 0 0.07
 8 10 -1 0.12 0.06
 -8 10 1 0.09 0.07
 -8 10 1 0.01 0.06
 -8 10 1 0.01 0.05
 -8 10 1 0.08 0.07
 -8 10 1 -0.04 0.08
 8 10 -1 -0.1 0.06
 -8 10 1 0.06 0.05
 7 -10 -1 1.81 0.17
 7 -10 -1 1.67 0.16
 7 -10 -1 1.69 0.16
 -7 -10 1 2.19 0.16
 -7 -10 1 1.97 0.14
 7 -10 -1 1.74 0.15
 -7 -10 1 2.35 0.17
 -7 10 1 1.77 0.16
 -7 10 1 1.89 0.16
 7 10 -1 2.13 0.16
 7 10 -1 2.01 0.16
 7 10 -1 2.02 0.12
 -7 10 1 1.98 0.15
 7 10 -1 2.18 0.17
 -7 10 1 1.77 0.16
 -7 10 1 1.75 0.15
 -7 10 1 1.78 0.17
 -6 -10 1 0.35 0.06
 6 -10 -1 0.36 0.07
 6 -10 -1 0.33 0.07
 -6 -10 1 0.32 0.06
 6 -10 -1 0.45 0.1
 -6 -10 1 0.44 0.09
 -6 -10 1 0.27 0.06
 6 -10 -1 0.44 0.1
 -6 10 1 0.29 0.08
 6 10 -1 0.28 0.07
 -6 10 1 0.3 0.06
 6 10 -1 0.25 0.07
 -6 10 1 0.28 0.06
 -6 10 1 0.34 0.07
 6 10 -1 0.59 0.09
 6 10 -1 0.23 0.05
 -6 10 1 0.44 0.09
 6 10 -1 0.38 0.05
 -6 10 1 0.3 0.07
 -5 -10 1 0.19 0.05
 -5 -10 1 0.37 0.06
 5 -10 -1 0.3 0.07
 5 -10 -1 0.23 0.06
 -5 -10 1 0.31 0.06
 -5 -10 1 0.34 0.06
 5 -10 -1 0.23 0.07
 5 -10 -1 0.25 0.06
 -5 -10 1 0.35 0.08
 -5 10 1 0.34 0.08
 5 10 -1 0.26 0.05
 -5 10 1 0.28 0.06
 -5 10 1 0.24 0.07
 -5 10 1 0.16 0.07
 -5 10 1 0.23 0.06
 5 10 -1 0.32 0.07
 5 10 -1 0.37 0.05
 -5 10 1 0.28 0.06
 5 10 -1 0.31 0.07
 5 10 -1 0.38 0.05
 5 10 -1 0.28 0.05
 4 -10 -1 10.16 0.62
 4 -10 -1 9.77 0.65
 4 -10 -1 10.4 0.6
 4 -10 -1 10.66 0.65
 -4 -10 1 9.7 0.62
 -4 -10 1 10 0.62
 -4 -10 1 10.24 0.64
 -4 -10 1 10.09 0.64
 -4 10 1 10.03 0.6
 -4 10 1 10.73 0.63
 4 10 -1 10.24 0.64
 4 10 -1 9.92 0.63
 4 10 -1 10.23 0.62
 -4 10 1 10.59 0.65
 4 10 -1 10 0.64
 4 10 -1 9.8 0.59
 4 10 -1 9.66 0.59
 3 -10 -1 2.81 0.2
 -3 -10 1 3.16 0.19
 3 -10 -1 2.74 0.2
 3 -10 -1 2.99 0.21
 -3 -10 1 3.22 0.2
 3 10 -1 2.84 0.19
 -3 10 1 2.89 0.21
 -3 10 1 3.06 0.2
 -3 10 1 3.02 0.2
 3 10 -1 3.18 0.19
 3 10 -1 2.96 0.2
 -3 10 1 2.88 0.19
 -2 -10 1 0.41 0.07
 -2 -10 1 0.61 0.08
 -2 -10 1 0.56 0.07
 -2 -10 1 0.43 0.07
 -2 -10 1 0.52 0.07
 2 -10 -1 0.78 0.09
 2 10 -1 0.51 0.07
 2 10 -1 0.59 0.08
 2 10 -1 0.61 0.07
 -2 10 1 0.76 0.08
 2 10 -1 0.52 0.07
 1 -10 -1 0.06 0.05
 -1 -10 1 0.15 0.04
 -1 -10 1 0.08 0.04
 1 -10 -1 0.03 0.05
 -1 -10 1 0.13 0.05
 -1 -10 1 0.12 0.05
 -1 -10 1 0.08 0.04
 1 -10 -1 0.01 0.05
 1 -10 -1 0.06 0.05
 1 10 -1 0.2 0.05
 -1 10 1 0.07 0.05
 -1 10 1 0.08 0.05
 1 10 -1 0.11 0.05
 1 10 -1 0.15 0.04
 0 -10 -1 23.2 1.5
 0 -10 1 24.7 1.38
 0 -10 1 24.13 1.5
 0 -10 -1 23.86 1.46
 0 -10 1 25.09 1.46
 0 10 1 22.61 1.5
 0 10 1 23.62 1.38
 0 10 -1 24.17 1.39
 0 10 1 24.77 1.5
 0 10 1 23.68 1.46
 0 10 -1 24.18 1.5
 0 10 -1 24.11 1.5
 -1 -10 -1 0.19 0.05
 -1 -10 -1 0.22 0.05
 -1 -10 -1 0.37 0.06
 -1 -10 -1 0.3 0.07
 1 -10 1 0.23 0.05
 -1 -10 -1 0.18 0.05
 1 -10 1 0.38 0.07
 1 10 1 0.28 0.07
 -1 10 -1 0.33 0.08
 1 10 1 0.2 0.05
 1 10 1 0.15 0.05
 1 10 1 0.22 0.05
 -1 10 -1 0.35 0.07
 2 -10 1 10.82 0.7
 -2 -10 -1 11.32 0.64
 -2 -10 -1 11.09 0.7
 2 -10 1 11.85 0.65
 -2 -10 -1 10.89 0.68
 -2 10 -1 11.59 0.7
 -2 10 -1 11.53 0.7
 -2 10 -1 10.59 0.65
 2 10 1 11.67 0.7
 2 10 1 10.6 0.7
 2 10 1 10.47 0.64
 2 10 1 10.42 0.64
 -3 -10 -1 1.67 0.13
 3 -10 1 1.66 0.13
 -3 -10 -1 1.74 0.13
 3 -10 1 1.57 0.13
 3 -10 1 1.67 0.14
 -3 -10 -1 1.7 0.13
 3 -10 1 1.64 0.14
 -3 -10 -1 1.74 0.12
 3 -10 1 1.78 0.13
 -3 -10 -1 1.82 0.13
 -3 10 -1 1.56 0.14
 3 10 1 1.67 0.13
 -3 10 -1 1.99 0.14
 3 10 1 1.74 0.12
 -3 10 -1 1.47 0.13
 3 10 1 1.86 0.13
 3 10 1 1.52 0.13
 3 10 1 1.59 0.12
 -3 10 -1 1.76 0.15
 -4 -10 -1 3.71 0.27
 -4 -10 -1 3.88 0.26
 4 -10 1 4.01 0.27
 4 -10 1 4.12 0.25
 -4 -10 -1 4.11 0.26
 -4 -10 -1 3.88 0.24
 4 -10 1 3.93 0.27
 4 -10 1 3.77 0.26
 -4 -10 -1 3.95 0.24
 4 -10 1 3.79 0.25
 -4 10 -1 4.03 0.26
 -4 10 -1 4.31 0.28
 4 10 1 3.95 0.26
 4 10 1 3.96 0.24
 -4 10 -1 3.73 0.25
 -4 10 -1 4.23 0.26
 -4 10 -1 3.84 0.27
 4 10 1 3.81 0.26
 4 10 1 4.06 0.26
 4 10 1 3.98 0.26
 5 -10 1 0.39 0.07
 -5 -10 -1 0.45 0.09
 -5 -10 -1 0.42 0.07
 -5 -10 -1 0.35 0.07
 5 -10 1 0.29 0.07
 -5 -10 -1 0.33 0.08
 5 -10 1 0.29 0.07
 5 -10 1 0.33 0.07
 5 -10 1 0.35 0.07
 -5 -10 -1 0.29 0.06
 -5 -10 -1 0.4 0.06
 5 10 1 0.27 0.07
 -5 10 -1 0.21 0.07
 -5 10 -1 0.32 0.07
 5 10 1 0.34 0.07
 5 10 1 0.32 0.06
 5 10 1 0.35 0.06
 -5 10 -1 0.4 0.08
 5 10 1 0.29 0.06
 5 10 1 0.34 0.08
 -5 10 -1 0.42 0.09
 -5 10 -1 0.39 0.08
 5 10 1 0.32 0.06
 -6 -10 -1 2.1 0.16
 6 -10 1 1.93 0.16
 -6 -10 -1 2.05 0.14
 6 -10 1 1.79 0.17
 -6 -10 -1 2 0.14
 6 -10 1 2.05 0.16
 -6 -10 -1 2.09 0.15
 -6 -10 -1 2.37 0.17
 6 -10 1 2.03 0.17
 -6 -10 -1 2.26 0.15
 6 -10 1 2.07 0.16
 6 -10 1 1.9 0.16
 -6 10 -1 2.05 0.16
 -6 10 -1 2.03 0.18
 6 10 1 1.83 0.14
 -6 10 -1 2.07 0.15
 6 10 1 2.22 0.14
 6 10 1 1.99 0.14
 -6 10 -1 1.93 0.17
 6 10 1 2.19 0.16
 6 10 1 1.99 0.16
 6 10 1 2.31 0.17
 -6 10 -1 1.86 0.16
 6 10 1 2.08 0.14
 7 -10 1 5.06 0.34
 -7 -10 -1 5.37 0.35
 7 -10 1 5.22 0.36
 -7 -10 -1 5.1 0.34
 7 -10 1 5.36 0.36
 -7 -10 -1 5.36 0.32
 -7 -10 -1 5.53 0.36
 7 -10 1 5.26 0.33
 7 -10 1 5.07 0.35
 7 -10 1 4.95 0.34
 -7 -10 -1 5.22 0.35
 -7 -10 -1 5.26 0.32
 7 10 1 5.68 0.32
 -7 10 -1 5.16 0.37
 7 10 1 5.28 0.32
 7 10 1 5.38 0.35
 -7 10 -1 5.27 0.34
 -7 10 -1 5.4 0.36
 -7 10 -1 5.48 0.36
 -7 10 -1 5.22 0.33
 7 10 1 5.43 0.35
 7 10 1 5.39 0.35
 -8 -10 -1 0.37 0.11
 8 -10 1 0.24 0.07
 8 -10 1 0.26 0.07
 -8 -10 -1 0.53 0.11
 8 -10 1 0.28 0.08
 -8 -10 -1 0.36 0.08
 8 -10 1 0.45 0.09
 8 -10 1 0.3 0.08
 8 -10 1 0.39 0.07
 -8 -10 -1 0.3 0.06
 8 10 1 0.44 0.09
 8 10 1 0.51 0.1
 8 10 1 0.34 0.06
 -8 10 -1 0.15 0.08
 8 10 1 0.3 0.08
 -8 10 -1 0.15 0.07
 -8 10 -1 0.48 0.09
 -8 10 -1 0.26 0.08
 -8 10 -1 0.4 0.1
 8 10 1 0.38 0.06
 -9 -10 -1 0 0.05
 9 -10 1 -0.04 0.09
 -9 -10 -1 0.09 0.05
 -9 -10 -1 -0.01 0.05
 9 -10 1 0.1 0.07
 9 -10 1 -0.01 0.06
 9 -10 1 -0.02 0.07
 -9 -10 -1 0.22 0.11
 -9 -10 -1 0.01 0.04
 -9 -10 -1 -0.03 0.07
 -9 10 -1 0.08 0.09
 -9 10 -1 0.02 0.08
 9 10 1 0.04 0.07
 9 10 1 0.04 0.04
 9 10 1 0.15 0.09
 -9 10 -1 0.04 0.06
 -9 10 -1 -0.16 0.08
 9 10 1 0.03 0.03
 -9 10 -1 -0.06 0.06
 -10 -10 -1 1.24 0.16
 -10 -10 -1 0.81 0.12
 10 -10 1 0.89 0.14
 -10 -10 -1 1.14 0.15
 10 -10 1 1.04 0.13
 10 -10 1 0.94 0.16
 -10 -10 -1 1.12 0.11
 10 -10 1 1.14 0.14
 10 10 1 0.97 0.08
 10 10 1 1 0.15
 -10 10 -1 0.91 0.17
 10 10 1 1.03 0.14
 10 10 1 0.97 0.08
 -10 10 -1 1.07 0.15
 11 -10 1 0.2 0.08
 11 -10 1 0.07 0.09
 11 -10 1 0.15 0.1
 -11 -10 -1 -0.02 0.07
 11 -10 1 0.21 0.11
 -11 -10 -1 0.04 0.07
 -11 -10 -1 -0.01 0.12
 -11 -10 -1 0.06 0.11
 11 -10 1 0.08 0.08
 11 10 1 -0.08 0.12
 11 10 1 0.08 0.08
 -11 10 -1 0.07 0.1
 -11 10 -1 0.1 0.11
 -12 -10 -1 0.07 0.07
 -12 -10 -1 -0.06 0.08
 12 -10 1 0.17 0.08
 -12 -10 -1 0.24 0.14
 12 -10 1 0.26 0.12
 12 -10 1 0.18 0.09
 -12 -10 -1 0.1 0.12
 12 -10 1 0.18 0.1
 12 -10 1 0.09 0.11
 -12 10 -1 0.18 0.11
 -12 10 -1 0.25 0.13
 -12 10 -1 0.22 0.13
 12 10 1 0.12 0.09
 12 10 1 -0.03 0.14
 -13 -10 -1 0.42 0.14
 13 -10 1 0.33 0.1
 13 -10 1 0.44 0.1
 -13 -10 -1 0.5 0.16
 -13 -10 -1 0.57 0.11
 13 -10 1 0.48 0.13
 13 10 1 0.35 0.11
 13 10 1 0.3 0.17
 -13 10 -1 0.34 0.13
 14 -10 1 -0.06 0.1
 -14 -10 -1 0.03 0.15
 14 -10 1 0.07 0.09
 -14 -10 -1 0.26 0.19
 -14 10 -1 -0.04 0.16
 15 -10 1 -0.07 0.1
 -15 -10 -1 -0.02 0.18
 -15 -10 -1 -0.16 0.15
 15 -10 1 0.26 0.1
 -15 -11 1 0.38 0.16
 15 -11 -1 0.04 0.1
 15 -11 -1 0.17 0.09
 -15 -11 1 0.01 0.2
 -14 -11 1 0.37 0.15
 14 -11 -1 0.34 0.1
 14 -11 -1 0.25 0.09
 -14 -11 1 0.29 0.16
 -14 11 1 0.24 0.14
 -14 11 1 0.39 0.14
 13 -11 -1 0.14 0.11
 13 -11 -1 0.08 0.09
 13 -11 -1 -0.09 0.12
 13 -11 -1 -0.02 0.09
 -13 -11 1 -0.05 0.13
 -13 -11 1 0.1 0.16
 13 11 -1 0.05 0.11
 -13 11 1 0.09 0.11
 -13 11 1 0.03 0.14
 12 -11 -1 0 0.11
 12 -11 -1 -0.13 0.08
 -12 -11 1 -0.02 0.06
 -12 -11 1 -0.07 0.14
 12 -11 -1 0.16 0.08
 -12 -11 1 0.04 0.06
 12 -11 -1 0.02 0.1
 -12 -11 1 -0.01 0.12
 12 11 -1 0.13 0.14
 -12 11 1 0.11 0.13
 12 11 -1 -0.07 0.1
 -12 11 1 -0.02 0.1
 -12 11 1 -0.04 0.12
 11 -11 -1 1.01 0.16
 11 -11 -1 0.85 0.13
 -11 -11 1 0.96 0.17
 11 -11 -1 0.83 0.17
 -11 -11 1 0.8 0.19
 11 -11 -1 0.65 0.14
 -11 -11 1 0.79 0.11
 -11 -11 1 0.75 0.11
 11 -11 -1 1.11 0.17
 11 11 -1 0.87 0.16
 -11 11 1 1.17 0.17
 11 11 -1 0.97 0.17
 -11 11 1 0.72 0.17
 -10 -11 1 0.31 0.12
 -10 -11 1 0.08 0.05
 10 -11 -1 -0.07 0.07
 10 -11 -1 -0.05 0.07
 -10 -11 1 0.08 0.04
 10 -11 -1 0.12 0.09
 10 -11 -1 0.07 0.09
 -10 -11 1 0.07 0.05
 10 -11 -1 0.03 0.09
 -10 11 1 -0.06 0.08
 -10 11 1 0.03 0.1
 10 11 -1 0.11 0.1
 10 11 -1 0.13 0.08
 -9 -11 1 0.65 0.09
 -9 -11 1 0.73 0.07
 9 -11 -1 0.58 0.11
 -9 -11 1 0.8 0.09
 -9 -11 1 0.64 0.13
 9 -11 -1 0.64 0.11
 9 -11 -1 0.44 0.1
 9 -11 -1 0.46 0.1
 -9 -11 1 0.75 0.12
 -9 11 1 0.68 0.11
 -9 11 1 0.52 0.13
 -9 11 1 0.42 0.1
 9 11 -1 0.54 0.11
 9 11 -1 0.76 0.12
 -9 11 1 0.66 0.12
 9 11 -1 0.58 0.13
 -9 11 1 0.53 0.12
 8 -11 -1 -0.04 0.06
 8 -11 -1 0.06 0.08
 -8 -11 1 0.02 0.04
 8 -11 -1 -0.02 0.07
 -8 -11 1 0.08 0.07
 8 -11 -1 0.1 0.07
 -8 -11 1 0.07 0.04
 -8 -11 1 0.06 0.09
 8 -11 -1 0.01 0.06
 -8 11 1 -0.03 0.05
 8 11 -1 0 0.07
 -8 11 1 0.01 0.08
 8 11 -1 0.11 0.07
 8 11 -1 0.07 0.07
 8 11 -1 0.02 0.02
 -8 11 1 0.06 0.08
 -8 11 1 0.07 0.07
 -8 11 1 0.05 0.06
 -8 11 1 0.1 0.05
 7 -11 -1 0.27 0.08
 7 -11 -1 0.3 0.07
 -7 -11 1 0.31 0.09
 7 -11 -1 0.5 0.09
 7 -11 -1 0.3 0.07
 7 -11 -1 0.27 0.07
 -7 -11 1 0.33 0.07
 -7 -11 1 0.29 0.07
 7 11 -1 0.56 0.1
 -7 11 1 0.31 0.08
 -7 11 1 0.38 0.08
 7 11 -1 0.27 0.05
 -7 11 1 0.49 0.11
 7 11 -1 0.23 0.07
 7 11 -1 0.28 0.07
 -7 11 1 0.55 0.08
 -7 11 1 0.31 0.08
 -7 11 1 0.4 0.09
 6 -11 -1 7.78 0.53
 6 -11 -1 7.78 0.55
 6 -11 -1 8.11 0.51
 -6 -11 1 8.71 0.53
 -6 -11 1 8.39 0.5
 6 -11 -1 7.98 0.51
 -6 11 1 7.99 0.51
 -6 11 1 8.76 0.53
 6 11 -1 8.78 0.49
 6 11 -1 8.91 0.53
 6 11 -1 8.84 0.49
 6 11 -1 8.55 0.53
 6 11 -1 8.77 0.53
 -6 11 1 8.35 0.54
 6 11 -1 8.7 0.54
 5 -11 -1 1.76 0.15
 -5 -11 1 1.5 0.12
 -5 -11 1 1.61 0.11
 5 -11 -1 1.65 0.14
 -5 -11 1 1.48 0.14
 5 -11 -1 1.79 0.13
 5 -11 -1 1.78 0.15
 -5 -11 1 1.32 0.13
 -5 -11 1 1.53 0.12
 -5 11 1 1.78 0.14
 -5 11 1 1.76 0.14
 5 11 -1 1.44 0.13
 5 11 -1 1.39 0.11
 5 11 -1 1.34 0.11
 -5 11 1 1.53 0.13
 -5 11 1 1.67 0.15
 5 11 -1 1.51 0.11
 -4 -11 1 5.33 0.31
 4 -11 -1 5.11 0.35
 4 -11 -1 4.97 0.33
 -4 -11 1 5.21 0.34
 4 -11 -1 5.56 0.35
 -4 -11 1 5.48 0.34
 4 -11 -1 5.54 0.32
 -4 -11 1 5.22 0.33
 4 -11 -1 5.24 0.32
 -4 11 1 4.77 0.32
 4 11 -1 5.1 0.34
 -4 11 1 5.18 0.35
 -4 11 1 5.25 0.35
 4 11 -1 5.28 0.33
 4 11 -1 5.68 0.34
 4 11 -1 4.99 0.31
 -4 11 1 5.68 0.32
 -4 11 1 4.73 0.33
 4 11 -1 4.86 0.33
 3 -11 -1 4.58 0.27
 -3 -11 1 4.32 0.28
 -3 -11 1 4.07 0.26
 3 -11 -1 4.07 0.27
 3 -11 -1 3.82 0.28
 3 -11 -1 4.23 0.26
 -3 -11 1 4.13 0.28
 -3 -11 1 4.29 0.28
 -3 -11 1 4.29 0.27
 -3 11 1 4.29 0.29
 -3 11 1 4.4 0.28
 3 11 -1 4.32 0.26
 3 11 -1 4.12 0.26
 3 11 -1 4.04 0.27
 3 11 -1 4.4 0.28
 -3 11 1 4.07 0.26
 -3 11 1 4.28 0.27
 -2 -11 1 0.65 0.08
 2 -11 -1 0.55 0.09
 2 -11 -1 0.66 0.07
 -2 -11 1 0.44 0.07
 2 -11 -1 0.67 0.08
 2 -11 -1 0.53 0.08
 -2 -11 1 0.49 0.07
 2 -11 -1 0.51 0.08
 2 11 -1 0.6 0.08
 -2 11 1 0.45 0.09
 2 11 -1 0.55 0.08
 -2 11 1 0.57 0.09
 -2 11 1 0.66 0.09
 2 11 -1 0.55 0.08
 2 11 -1 0.65 0.08
 2 11 -1 0.57 0.07
 -2 11 1 0.71 0.08
 1 -11 -1 0.92 0.09
 -1 -11 1 1.03 0.1
 1 -11 -1 1.05 0.1
 -1 -11 1 1 0.09
 -1 -11 1 0.84 0.09
 1 -11 -1 0.89 0.09
 -1 -11 1 0.87 0.09
 1 -11 -1 0.96 0.1
 -1 -11 1 0.91 0.09
 1 11 -1 0.78 0.09
 1 11 -1 0.93 0.09
 -1 11 1 1.01 0.09
 1 11 -1 1.2 0.1
 -1 11 1 1.01 0.1
 -1 11 1 0.89 0.09
 -1 11 1 1.03 0.09
 1 11 -1 0.76 0.09
 1 11 -1 0.81 0.09
 -1 11 1 1.03 0.09
 0 -11 1 2.91 0.2
 0 -11 -1 3.53 0.22
 0 -11 -1 3.42 0.2
 0 -11 -1 3.49 0.21
 0 -11 1 2.94 0.22
 0 -11 -1 3.18 0.22
 0 -11 1 2.98 0.21
 0 -11 -1 3.35 0.21
 0 11 1 3.11 0.22
 0 11 -1 3.36 0.22
 0 11 1 3.24 0.2
 0 11 -1 2.95 0.2
 0 11 -1 3.01 0.22
 0 11 1 3.16 0.21
 0 11 1 3.27 0.21
 -1 -11 -1 0.37 0.07
 1 -11 1 0.52 0.08
 -1 -11 -1 0.31 0.07
 -1 -11 -1 0.3 0.07
 -1 -11 -1 0.26 0.06
 1 -11 1 0.51 0.08
 1 -11 1 0.52 0.08
 -1 -11 -1 0.26 0.05
 1 11 1 0.23 0.05
 -1 11 -1 0.35 0.08
 1 11 1 0.43 0.07
 1 11 1 0.31 0.07
 1 11 1 0.45 0.07
 1 11 1 0.3 0.07
 -2 -11 -1 3.13 0.21
 -2 -11 -1 3.15 0.21
 2 -11 1 3.14 0.21
 2 -11 1 3.38 0.22
 -2 -11 -1 3 0.21
 -2 -11 -1 3.07 0.21
 2 11 1 3.02 0.2
 -2 11 -1 3 0.2
 -2 11 -1 3.24 0.22
 2 11 1 2.93 0.2
 -2 11 -1 3.24 0.21
 2 11 1 3.08 0.21
 2 11 1 3.04 0.21
 -2 11 -1 2.96 0.22
 3 -11 1 1.01 0.12
 3 -11 1 1.1 0.1
 -3 -11 -1 1.37 0.11
 -3 -11 -1 1.08 0.11
 -3 -11 -1 1.23 0.11
 3 -11 1 1.01 0.11
 3 -11 1 1.03 0.11
 -3 -11 -1 1.23 0.1
 -3 -11 -1 1.38 0.1
 -3 11 -1 1.24 0.12
 -3 11 -1 1.09 0.11
 -3 11 -1 1.02 0.12
 3 11 1 1.29 0.11
 3 11 1 1.38 0.1
 3 11 1 1.17 0.1
 -3 11 -1 1.06 0.11
 -3 11 -1 1.12 0.11
 3 11 1 1.19 0.1
 3 11 1 1.31 0.11
 -4 -11 -1 6.42 0.43
 -4 -11 -1 6.44 0.42
 4 -11 1 6.69 0.44
 4 -11 1 6.18 0.4
 -4 -11 -1 6.47 0.39
 4 -11 1 6.24 0.42
 -4 -11 -1 6.97 0.39
 -4 -11 -1 6.77 0.42
 4 -11 1 6.56 0.43
 -4 -11 -1 6.73 0.42
 -4 11 -1 6.85 0.44
 -4 11 -1 6.82 0.42
 -4 11 -1 6.46 0.43
 4 11 1 6.88 0.39
 4 11 1 6.5 0.42
 4 11 1 6.86 0.42
 4 11 1 6.94 0.42
 -4 11 -1 5.96 0.4
 4 11 1 6.92 0.42
 -5 -11 -1 1.06 0.11
 -5 -11 -1 1.33 0.11
 5 -11 1 1.2 0.13
 5 -11 1 0.89 0.12
 -5 -11 -1 1.2 0.09
 -5 -11 -1 1.15 0.11
 -5 -11 -1 1.29 0.14
 5 -11 1 1.02 0.12
 -5 -11 -1 1.33 0.1
 5 -11 1 0.94 0.13
 5 -11 1 1.08 0.11
 5 11 1 1.32 0.1
 5 11 1 1.19 0.1
 5 11 1 1.22 0.13
 5 11 1 1.11 0.11
 -5 11 -1 1.01 0.13
 5 11 1 1.23 0.1
 -5 11 -1 0.91 0.12
 5 11 1 1.21 0.1
 -5 11 -1 1.1 0.11
 5 11 1 1.38 0.11
 -5 11 -1 1.19 0.14
 6 -11 1 0.14 0.07
 -6 -11 -1 0.03 0.06
 -6 -11 -1 0.12 0.08
 6 -11 1 0.02 0.06
 -6 -11 -1 0.07 0.04
 -6 -11 -1 0.06 0.05
 6 -11 1 0.2 0.08
 -6 -11 -1 0.06 0.05
 6 -11 1 0.04 0.06
 6 -11 1 -0.02 0.06
 -6 -11 -1 0.07 0.04
 -6 11 -1 0.06 0.06
 6 11 1 0.07 0.06
 -6 11 -1 0.12 0.05
 6 11 1 0.05 0.06
 6 11 1 0.04 0.06
 -6 11 -1 -0.01 0.05
 6 11 1 0.06 0.04
 -6 11 -1 0.02 0.08
 6 11 1 0.05 0.04
 -6 11 -1 -0.01 0.07
 6 11 1 0.02 0.04
 6 11 1 0.04 0.04
 -7 -11 -1 0.97 0.08
 -7 -11 -1 1.01 0.11
 7 -11 1 0.9 0.11
 7 -11 1 0.85 0.11
 7 -11 1 0.85 0.14
 -7 -11 -1 0.92 0.12
 -7 -11 -1 0.88 0.1
 7 -11 1 0.9 0.11
 7 -11 1 0.8 0.13
 7 -11 1 0.86 0.13
 -7 -11 -1 0.76 0.09
 -7 -11 -1 1.03 0.11
 -7 11 -1 0.74 0.14
 7 11 1 0.79 0.11
 -7 11 -1 0.79 0.13
 -7 11 -1 1.01 0.1
 7 11 1 0.84 0.08
 -7 11 -1 0.74 0.11
 -7 11 -1 0.99 0.12
 7 11 1 1.2 0.12
 -7 11 -1 0.83 0.1
 7 11 1 0.9 0.09
 7 11 1 1.09 0.11
 7 11 1 0.83 0.07
 8 -11 1 0.7 0.13
 -8 -11 -1 0.57 0.07
 -8 -11 -1 0.42 0.09
 8 -11 1 0.68 0.11
 8 -11 1 0.71 0.1
 8 -11 1 0.64 0.12
 -8 -11 -1 0.52 0.1
 8 -11 1 0.76 0.11
 -8 -11 -1 0.48 0.09
 8 -11 1 0.8 0.14
 -8 -11 -1 0.84 0.14
 -8 11 -1 0.6 0.1
 8 11 1 0.56 0.11
 -8 11 -1 0.78 0.1
 -8 11 -1 0.62 0.14
 8 11 1 0.5 0.07
 -8 11 -1 0.46 0.09
 -8 11 -1 0.88 0.12
 8 11 1 0.51 0.11
 -8 11 -1 0.39 0.09
 8 11 1 0.51 0.07
 8 11 1 0.63 0.11
 -9 -11 -1 -0.01 0.06
 -9 -11 -1 -0.02 0.11
 -9 -11 -1 -0.01 0.06
 9 -11 1 0.06 0.07
 -9 -11 -1 -0.04 0.05
 9 -11 1 -0.01 0.09
 9 -11 1 0.06 0.09
 -9 -11 -1 -0.02 0.08
 -9 -11 -1 0.07 0.05
 9 -11 1 0.05 0.08
 9 -11 1 0.07 0.07
 -9 11 -1 0.09 0.09
 -9 11 -1 0.08 0.1
 9 11 1 0.17 0.08
 -9 11 -1 0.04 0.07
 -9 11 -1 -0.02 0.09
 9 11 1 0.01 0.09
 9 11 1 0.11 0.04
 9 11 1 0.01 0.04
 10 -11 1 0.1 0.08
 -10 -11 -1 0.11 0.11
 10 -11 1 0.17 0.1
 10 -11 1 -0.05 0.08
 -10 -11 -1 -0.03 0.06
 10 -11 1 0.07 0.08
 10 -11 1 0.04 0.1
 -10 -11 -1 0.1 0.06
 10 11 1 0.1 0.03
 -10 11 -1 0.08 0.1
 -10 11 -1 -0.06 0.09
 10 11 1 0.09 0.04
 10 11 1 0.08 0.08
 -10 11 -1 0.06 0.1
 10 11 1 0.09 0.11
 11 -11 1 0.02 0.08
 11 -11 1 0.02 0.11
 -11 -11 -1 0.04 0.07
 11 -11 1 -0.04 0.09
 -11 -11 -1 -0.08 0.07
 -11 -11 -1 0.15 0.14
 11 11 1 0.2 0.12
 -11 11 -1 0.02 0.11
 11 11 1 0.01 0.09
 -11 11 -1 0.03 0.12
 12 -11 1 0.56 0.13
 -12 -11 -1 0.37 0.09
 12 -11 1 0.45 0.1
 -12 -11 -1 0.5 0.11
 12 -11 1 0.32 0.11
 -12 -11 -1 0.52 0.17
 12 -11 1 0.41 0.13
 12 -11 1 0.36 0.1
 12 11 1 0.51 0.15
 -12 11 -1 0.58 0.13
 -12 11 -1 0.34 0.12
 12 11 1 0.48 0.1
 13 -11 1 0.51 0.11
 13 -11 1 0.61 0.15
 -13 -11 -1 0.44 0.18
 -13 -11 -1 0.47 0.08
 13 -11 1 0.56 0.1
 13 11 1 0.43 0.17
 -13 11 -1 0.89 0.2
 -13 11 -1 0.54 0.14
 13 11 1 0.35 0.11
 -14 -11 -1 0.36 0.17
 14 -11 1 0 0.09
 14 -11 1 0.17 0.1
 -14 11 -1 0.34 0.17
 15 -11 1 -0.09 0.11
 -15 -11 -1 0.06 0.16
 15 -11 1 0.24 0.1
 15 -12 -1 -0.2 0.09
 -15 -12 1 -0.21 0.19
 15 -12 -1 -0.03 0.11
 -15 12 1 0.03 0.17
 14 -12 -1 -0.02 0.1
 -14 -12 1 -0.05 0.15
 14 -12 -1 -0.15 0.09
 -14 12 1 -0.08 0.13
 -14 12 1 -0.12 0.13
 -13 -12 1 0.15 0.14
 13 -12 -1 -0.09 0.09
 13 -12 -1 -0.18 0.12
 13 -12 -1 0.05 0.09
 -13 12 1 0.04 0.12
 -13 12 1 0.15 0.12
 12 -12 -1 0.41 0.13
 -12 -12 1 0.3 0.07
 12 -12 -1 0.37 0.12
 12 -12 -1 0.19 0.09
 -12 -12 1 0.34 0.07
 12 -12 -1 0.41 0.09
 -12 -12 1 0.29 0.14
 -12 12 1 0.34 0.12
 -12 12 1 0.35 0.12
 12 12 -1 0.25 0.11
 -11 -12 1 0.16 0.06
 -11 -12 1 0.1 0.06
 11 -12 -1 0.17 0.11
 -11 -12 1 0.4 0.13
 11 -12 -1 0.01 0.08
 11 -12 -1 0.14 0.11
 11 -12 -1 0.1 0.08
 11 12 -1 0.25 0.1
 -11 12 1 0.14 0.1
 11 12 -1 0.03 0.12
 -11 12 1 0.09 0.1
 10 -12 -1 0.71 0.15
 10 -12 -1 0.56 0.11
 -10 -12 1 0.76 0.1
 10 -12 -1 0.57 0.12
 -10 -12 1 0.76 0.14
 -10 -12 1 0.63 0.07
 -10 -12 1 0.62 0.07
 -10 -12 1 0.62 0.1
 10 -12 -1 0.4 0.09
 10 -12 -1 0.58 0.11
 -10 12 1 0.76 0.12
 -10 12 1 0.77 0.14
 10 12 -1 0.67 0.14
 10 12 -1 0.64 0.15
 -10 12 1 0.54 0.11
 -9 -12 1 2.04 0.14
 9 -12 -1 1.93 0.17
 9 -12 -1 2.15 0.19
 -9 -12 1 1.85 0.19
 9 -12 -1 2.17 0.2
 9 -12 -1 2.25 0.18
 -9 -12 1 2.01 0.2
 9 -12 -1 2.12 0.19
 -9 -12 1 2.08 0.16
 -9 -12 1 2.04 0.16
 -9 12 1 1.91 0.18
 9 12 -1 2.16 0.19
 -9 12 1 2.4 0.19
 -9 12 1 1.99 0.18
 -9 12 1 2.04 0.19
 -9 12 1 2.18 0.19
 9 12 -1 2.3 0.18
 9 12 -1 2.03 0.18
 8 -12 -1 -0.01 0.08
 8 -12 -1 0.03 0.07
 -8 -12 1 0.05 0.05
 -8 -12 1 0 0.04
 -8 -12 1 0.06 0.09
 8 -12 -1 -0.13 0.08
 8 -12 -1 -0.04 0.06
 8 -12 -1 0.05 0.07
 -8 -12 1 0.08 0.07
 -8 12 1 0.03 0.07
 -8 12 1 -0.01 0.07
 -8 12 1 0.04 0.08
 8 12 -1 0.08 0.07
 -8 12 1 0.1 0.05
 -8 12 1 0.04 0.06
 8 12 -1 0.05 0.03
 -8 12 1 0 0.05
 8 12 -1 -0.09 0.07
 8 12 -1 0.07 0.07
 8 12 -1 0.02 0.03
 -7 -12 1 1.42 0.14
 7 -12 -1 1.15 0.14
 -7 -12 1 1.33 0.11
 7 -12 -1 1.61 0.14
 -7 -12 1 1.39 0.12
 -7 -12 1 1.47 0.14
 7 -12 -1 1.36 0.14
 7 -12 -1 1.49 0.14
 7 -12 -1 1.51 0.15
 7 12 -1 1.38 0.1
 -7 12 1 1.4 0.15
 -7 12 1 1.43 0.16
 7 12 -1 1.34 0.13
 7 12 -1 1.51 0.14
 -7 12 1 1.35 0.12
 7 12 -1 1.31 0.14
 -7 12 1 1.46 0.15
 -7 12 1 1.6 0.14
 -7 12 1 1.37 0.13
 -6 -12 1 0.51 0.1
 6 -12 -1 0.38 0.08
 -6 -12 1 0.32 0.07
 6 -12 -1 0.63 0.1
 6 -12 -1 0.41 0.08
 -6 -12 1 0.39 0.08
 6 -12 -1 0.32 0.08
 -6 -12 1 0.31 0.07
 -6 -12 1 0.43 0.08
 6 12 -1 0.41 0.08
 6 12 -1 0.3 0.06
 -6 12 1 0.53 0.09
 6 12 -1 0.34 0.06
 -6 12 1 0.6 0.1
 -6 12 1 0.38 0.1
 6 12 -1 0.26 0.07
 6 12 -1 0.33 0.06
 -6 12 1 0.41 0.08
 -6 12 1 0.5 0.09
 6 12 -1 0.2 0.07
 -6 12 1 0.53 0.11
 5 -12 -1 3.93 0.25
 5 -12 -1 3.95 0.26
 5 -12 -1 3.5 0.25
 -5 -12 1 3.59 0.24
 -5 -12 1 3.88 0.26
 -5 -12 1 3.83 0.26
 -5 -12 1 4.12 0.26
 5 -12 -1 3.88 0.28
 5 -12 -1 4 0.28
 5 12 -1 4.32 0.27
 5 12 -1 3.54 0.25
 5 12 -1 3.92 0.26
 5 12 -1 3.69 0.26
 -5 12 1 4.09 0.28
 5 12 -1 3.75 0.24
 5 12 -1 4.14 0.26
 5 12 -1 3.92 0.24
 -5 12 1 4.12 0.27
 -5 12 1 3.57 0.25
 -4 -12 1 1.51 0.11
 -4 -12 1 1.59 0.12
 -4 -12 1 1.56 0.12
 4 -12 -1 1.23 0.14
 4 -12 -1 1.4 0.13
 4 -12 -1 1.24 0.12
 4 -12 -1 1.39 0.13
 -4 -12 1 1.46 0.13
 -4 -12 1 1.37 0.12
 -4 -12 1 1.63 0.11
 4 -12 -1 1.19 0.13
 -4 12 1 1.3 0.12
 4 12 -1 1.62 0.14
 -4 12 1 1.41 0.12
 4 12 -1 1.25 0.11
 -4 12 1 1.46 0.13
 -4 12 1 1.06 0.14
 -4 12 1 1.4 0.13
 4 12 -1 1.55 0.12
 4 12 -1 1.33 0.12
 3 -12 -1 10.08 0.66
 -3 -12 1 10.59 0.64
 -3 -12 1 10.3 0.61
 -3 -12 1 10.46 0.64
 3 -12 -1 10.52 0.61
 -3 -12 1 10.09 0.66
 -3 -12 1 11.05 0.66
 3 -12 -1 9.7 0.64
 -3 12 1 11.09 0.64
 -3 12 1 10.5 0.66
 -3 12 1 10.12 0.61
 3 12 -1 10.54 0.61
 3 12 -1 9.84 0.66
 -2 -12 1 2.36 0.17
 -2 -12 1 2.31 0.17
 -2 -12 1 2.15 0.16
 2 -12 -1 2.51 0.17
 2 -12 -1 2.2 0.17
 -2 -12 1 2.24 0.17
 2 -12 -1 2.22 0.17
 2 12 -1 2.23 0.17
 -2 12 1 2.31 0.18
 -2 12 1 2.62 0.17
 -2 12 1 2.27 0.16
 -2 12 1 2.18 0.17
 2 12 -1 2.31 0.16
 2 12 -1 2.38 0.16
 -2 12 1 2.29 0.16
 2 12 -1 2.43 0.17
 1 -12 -1 0.98 0.11
 1 -12 -1 0.94 0.09
 -1 -12 1 1.1 0.1
 -1 -12 1 0.85 0.09
 -1 -12 1 0.9 0.09
 -1 -12 1 0.85 0.1
 1 -12 -1 0.76 0.1
 1 -12 -1 0.89 0.1
 -1 -12 1 1.08 0.1
 -1 12 1 0.96 0.11
 1 12 -1 0.75 0.09
 1 12 -1 0.91 0.09
 -1 12 1 0.79 0.09
 1 12 -1 0.98 0.1
 1 12 -1 0.82 0.09
 -1 12 1 0.87 0.09
 -1 12 1 0.85 0.09
 1 12 -1 0.97 0.1
 0 -12 -1 0.46 0.07
 0 -12 1 0.36 0.07
 0 -12 -1 0.43 0.08
 0 -12 -1 0.54 0.08
 0 -12 1 0.43 0.07
 0 -12 1 0.43 0.08
 0 -12 -1 0.44 0.08
 0 -12 1 0.4 0.07
 0 12 -1 0.43 0.09
 0 12 1 0.42 0.08
 0 12 -1 0.38 0.08
 0 12 1 0.44 0.08
 0 12 1 0.39 0.08
 0 12 -1 0.47 0.07
 0 12 1 0.41 0.08
 0 12 1 0.44 0.07
 0 12 -1 0.49 0.08
 -1 -12 -1 11.03 0.74
 -1 -12 -1 11.19 0.74
 1 -12 1 12.53 0.74
 -1 -12 -1 11.4 0.72
 1 -12 1 11.28 0.71
 1 -12 1 12.57 0.74
 1 12 1 12.11 0.68
 -1 12 -1 12.33 0.69
 1 12 1 11.26 0.72
 -1 12 -1 11.42 0.72
 1 12 1 11.48 0.68
 -1 12 -1 11.15 0.74
 2 -12 1 0.8 0.11
 2 -12 1 0.61 0.1
 -2 -12 -1 0.72 0.09
 -2 -12 -1 0.93 0.09
 2 -12 1 0.82 0.09
 -2 -12 -1 1.12 0.1
 -2 -12 -1 0.96 0.1
 -2 -12 -1 0.86 0.1
 -2 -12 -1 0.77 0.09
 2 12 1 0.94 0.09
 -2 12 -1 0.72 0.1
 2 12 1 0.88 0.09
 2 12 1 0.92 0.1
 2 12 1 0.99 0.11
 2 12 1 0.75 0.09
 -2 12 -1 0.89 0.09
 -2 12 -1 0.94 0.1
 -2 12 -1 0.91 0.1
 -2 12 -1 0.9 0.11
 -3 -12 -1 0.16 0.06
 3 -12 1 0.09 0.06
 3 -12 1 0.08 0.06
 3 -12 1 -0.03 0.06
 -3 -12 -1 0.05 0.05
 -3 -12 -1 0.1 0.05
 -3 -12 -1 0.03 0.04
 -3 -12 -1 0.13 0.05
 3 -12 1 0.16 0.05
 3 12 1 0.06 0.05
 -3 12 -1 0.03 0.05
 3 12 1 0.02 0.05
 3 12 1 0.11 0.05
 -3 12 -1 0.02 0.05
 3 12 1 0.05 0.05
 -3 12 -1 0.05 0.05
 -3 12 -1 0.16 0.06
 -3 12 -1 0.09 0.06
 3 12 1 0.03 0.06
 -4 -12 -1 0.58 0.07
 -4 -12 -1 0.52 0.09
 -4 -12 -1 0.55 0.11
 -4 -12 -1 0.44 0.09
 -4 -12 -1 0.56 0.08
 4 -12 1 0.49 0.11
 4 -12 1 0.42 0.08
 4 -12 1 0.62 0.09
 -4 -12 -1 0.42 0.08
 4 -12 1 0.47 0.11
 4 -12 1 0.45 0.1
 4 12 1 0.53 0.08
 -4 12 -1 0.42 0.09
 -4 12 -1 0.35 0.07
 -4 12 -1 0.56 0.1
 -4 12 -1 0.58 0.1
 4 12 1 0.59 0.08
 4 12 1 0.5 0.09
 4 12 1 0.58 0.08
 4 12 1 0.51 0.08
 4 12 1 0.51 0.1
 5 -12 1 0.07 0.07
 -5 -12 -1 0.03 0.04
 5 -12 1 -0.01 0.06
 -5 -12 -1 0.02 0.05
 -5 -12 -1 0.1 0.09
 -5 -12 -1 0.05 0.04
 -5 -12 -1 0.07 0.05
 -5 -12 -1 0 0.05
 5 -12 1 0.01 0.05
 5 -12 1 0.09 0.07
 5 -12 1 -0.07 0.07
 -5 12 -1 0.06 0.08
 5 12 1 0 0.06
 5 12 1 0.07 0.04
 5 12 1 0.06 0.04
 5 12 1 0 0.05
 -5 12 -1 -0.03 0.06
 -5 12 -1 0.08 0.08
 5 12 1 0.11 0.06
 -5 12 -1 -0.1 0.06
 5 12 1 0.1 0.05
 -5 12 -1 0.01 0.06
 5 12 1 0.09 0.05
 -6 -12 -1 0.72 0.07
 -6 -12 -1 0.45 0.08
 -6 -12 -1 0.55 0.11
 6 -12 1 0.33 0.08
 -6 -12 -1 0.46 0.1
 -6 -12 -1 0.65 0.1
 6 -12 1 0.63 0.12
 6 -12 1 0.45 0.09
 6 -12 1 0.5 0.11
 -6 -12 -1 0.46 0.09
 6 -12 1 0.44 0.11
 -6 12 -1 0.6 0.1
 -6 12 -1 0.54 0.12
 6 12 1 0.71 0.11
 6 12 1 0.53 0.08
 6 12 1 0.57 0.07
 6 12 1 0.59 0.07
 6 12 1 0.61 0.08
 -6 12 -1 0.52 0.1
 6 12 1 0.47 0.08
 -6 12 -1 0.5 0.09
 6 12 1 0.72 0.09
 -6 12 -1 0.41 0.09
 -7 -12 -1 0.08 0.07
 7 -12 1 0.21 0.07
 7 -12 1 0.1 0.07
 -7 -12 -1 0.06 0.06
 -7 -12 -1 0.12 0.05
 7 -12 1 0.08 0.07
 -7 -12 -1 0.13 0.04
 7 -12 1 0.02 0.09
 7 -12 1 0.1 0.06
 7 -12 1 0.18 0.07
 -7 -12 -1 0.15 0.09
 -7 -12 -1 0.09 0.05
 -7 12 -1 -0.02 0.09
 -7 12 -1 0.1 0.07
 7 12 1 0.09 0.03
 7 12 1 0.04 0.04
 7 12 1 0.18 0.07
 7 12 1 0.16 0.07
 -7 12 -1 0.13 0.08
 7 12 1 -0.02 0.07
 -7 12 -1 0.11 0.05
 -7 12 -1 0.03 0.05
 -7 12 -1 0.23 0.09
 7 12 1 0.04 0.03
 7 12 1 0.13 0.05
 8 -12 1 0.2 0.08
 8 -12 1 0.06 0.09
 -8 -12 -1 0.21 0.08
 -8 -12 -1 0.2 0.06
 8 -12 1 0.14 0.07
 8 -12 1 0.23 0.08
 8 -12 1 0.2 0.09
 -8 -12 -1 0.15 0.05
 -8 -12 -1 0.31 0.07
 8 -12 1 0.22 0.07
 -8 -12 -1 0.31 0.1
 -8 12 -1 0.19 0.06
 -8 12 -1 0.22 0.08
 8 12 1 0.18 0.04
 -8 12 -1 0.15 0.07
 -8 12 -1 0.24 0.07
 8 12 1 0.24 0.08
 -8 12 -1 0.08 0.08
 8 12 1 0.18 0.07
 -8 12 -1 0.23 0.1
 8 12 1 0.14 0.05
 8 12 1 0.21 0.08
 9 -12 1 7.36 0.48
 9 -12 1 7.27 0.52
 -9 -12 -1 7.32 0.49
 9 -12 1 7.3 0.49
 -9 -12 -1 7.08 0.49
 9 -12 1 7.6 0.51
 -9 -12 -1 7.96 0.5
 -9 -12 -1 7.41 0.49
 -9 -12 -1 7.76 0.45
 9 -12 1 7.23 0.47
 -9 12 -1 7.8 0.49
 9 12 1 7.97 0.45
 -9 12 -1 7.5 0.5
 9 12 1 8.15 0.49
 -9 12 -1 7.6 0.52
 -9 12 -1 7.11 0.48
 9 12 1 7.8 0.49
 9 12 1 8.15 0.45
 -10 -12 -1 0.1 0.07
 10 -12 1 0.08 0.08
 10 -12 1 0.01 0.11
 10 -12 1 0.05 0.08
 10 -12 1 0.08 0.1
 -10 -12 -1 -0.04 0.07
 -10 -12 -1 0.08 0.11
 -10 -12 -1 -0.05 0.06
 10 -12 1 -0.02 0.09
 -10 -12 -1 0.09 0.09
 10 12 1 0.14 0.09
 -10 12 -1 0.04 0.1
 10 12 1 0.07 0.04
 -10 12 -1 0.06 0.08
 -10 12 -1 0.05 0.11
 10 12 1 0.04 0.04
 10 12 1 0.12 0.11
 -10 12 -1 0.01 0.11
 -11 -12 -1 0.48 0.09
 11 -12 1 0.83 0.19
 -11 -12 -1 0.9 0.17
 11 -12 1 0.66 0.15
 11 -12 1 0.38 0.13
 -11 -12 -1 0.51 0.11
 11 -12 1 0.4 0.11
 -11 12 -1 0.2 0.12
 11 12 1 0.77 0.14
 -11 12 -1 0.57 0.14
 11 12 1 0.69 0.15
 -11 12 -1 0.38 0.12
 -12 -12 -1 0.04 0.08
 -12 -12 -1 -0.19 0.13
 12 -12 1 0.03 0.08
 12 -12 1 0.02 0.13
 -12 -12 -1 0.01 0.09
 12 -12 1 -0.01 0.11
 12 -12 1 0.07 0.09
 -12 12 -1 -0.07 0.13
 12 12 1 -0.14 0.1
 12 12 1 -0.07 0.14
 -12 12 -1 -0.04 0.12
 -13 -12 -1 -0.05 0.15
 -13 -12 -1 0.09 0.07
 13 -12 1 0.03 0.09
 13 -12 1 0.08 0.1
 13 12 1 -0.04 0.11
 -13 12 -1 0.1 0.14
 -13 12 -1 0.23 0.15
 13 12 1 0.09 0.17
 -14 -12 -1 0.18 0.16
 14 -12 1 0.1 0.1
 -14 12 -1 0.15 0.15
 -14 12 -1 0.34 0.15
 15 -12 1 -0.03 0.1
 -15 -12 -1 -0.19 0.19
 -15 12 -1 -0.08 0.16
 -15 -13 1 0.29 0.18
 15 -13 -1 0.18 0.1
 -15 13 1 0.42 0.19
 14 -13 -1 0.23 0.1
 -14 -13 1 0.51 0.19
 14 -13 -1 0.25 0.11
 -14 13 1 0.21 0.16
 -14 13 1 0.23 0.14
 13 -13 -1 0.01 0.14
 13 -13 -1 -0.04 0.09
 13 -13 -1 -0.05 0.1
 -13 -13 1 -0.27 0.13
 -13 13 1 -0.04 0.12
 -13 13 1 0.06 0.14
 12 -13 -1 -0.04 0.12
 -12 -13 1 0.07 0.07
 -12 -13 1 0.01 0.07
 12 -13 -1 -0.13 0.09
 12 -13 -1 0.04 0.08
 -12 13 1 0.03 0.12
 11 -13 -1 0.06 0.11
 11 -13 -1 0.03 0.11
 -11 -13 1 0.12 0.07
 -11 -13 1 0.02 0.07
 11 -13 -1 -0.07 0.11
 -11 -13 1 0.13 0.14
 -11 -13 1 0.02 0.04
 11 -13 -1 -0.03 0.08
 11 -13 -1 0.09 0.08
 -11 13 1 0.29 0.11
 -11 13 1 0.15 0.1
 11 13 -1 0.12 0.11
 -11 13 1 -0.01 0.1
 11 13 -1 -0.06 0.13
 -10 -13 1 0.72 0.1
 10 -13 -1 0.36 0.11
 10 -13 -1 0.74 0.15
 10 -13 -1 0.53 0.13
 10 -13 -1 0.51 0.11
 -10 -13 1 0.43 0.07
 10 -13 -1 0.61 0.12
 -10 -13 1 0.3 0.11
 -10 -13 1 0.83 0.14
 -10 -13 1 0.42 0.08
 -10 -13 1 0.55 0.07
 10 13 -1 0.58 0.12
 -10 13 1 0.48 0.11
 10 13 -1 0.68 0.15
 -10 13 1 0.62 0.14
 -10 13 1 0.72 0.16
 -10 13 1 0.56 0.12
 -9 -13 1 0.62 0.11
 9 -13 -1 0.68 0.13
 -9 -13 1 0.75 0.08
 -9 -13 1 0.76 0.13
 9 -13 -1 0.46 0.09
 9 -13 -1 0.43 0.1
 9 -13 -1 0.88 0.15
 -9 -13 1 0.77 0.1
 -9 -13 1 0.63 0.07
 9 -13 -1 0.59 0.13
 -9 13 1 0.86 0.15
 9 13 -1 0.64 0.13
 9 13 -1 0.88 0.13
 -9 13 1 0.6 0.13
 -9 13 1 0.75 0.12
 -9 13 1 0.44 0.1
 9 13 -1 0.57 0.12
 -8 -13 1 1.22 0.11
 -8 -13 1 1.3 0.12
 8 -13 -1 1.32 0.15
 8 -13 -1 1.35 0.14
 8 -13 -1 0.99 0.15
 -8 -13 1 1.3 0.14
 -8 -13 1 1.46 0.15
 8 -13 -1 1.46 0.17
 8 -13 -1 1.18 0.15
 -8 13 1 1.27 0.12
 8 13 -1 1.21 0.09
 -8 13 1 1.31 0.15
 8 13 -1 1.12 0.14
 -8 13 1 1.29 0.16
 -8 13 1 1.37 0.15
 8 13 -1 1.07 0.15
 -8 13 1 1.34 0.12
 -8 13 1 1.38 0.14
 8 13 -1 1.42 0.1
 8 13 -1 1.39 0.14
 7 -13 -1 2.01 0.18
 -7 -13 1 1.86 0.15
 -7 -13 1 2.04 0.17
 7 -13 -1 2.16 0.18
 7 -13 -1 2.17 0.17
 -7 -13 1 2.11 0.17
 -7 -13 1 2.11 0.15
 7 -13 -1 2.04 0.19
 7 -13 -1 2.26 0.17
 -7 13 1 2 0.15
 -7 13 1 2.16 0.18
 -7 13 1 2.16 0.17
 7 13 -1 1.97 0.14
 7 13 -1 1.88 0.17
 7 13 -1 2.2 0.19
 7 13 -1 1.88 0.16
 -7 13 1 2.03 0.19
 -7 13 1 2.27 0.17
 -7 13 1 2 0.17
 -6 -13 1 2.49 0.19
 -6 -13 1 2.93 0.2
 6 -13 -1 2.81 0.2
 6 -13 -1 2.86 0.21
 -6 -13 1 2.4 0.19
 6 -13 -1 3 0.2
 -6 -13 1 2.65 0.17
 -6 -13 1 2.6 0.19
 6 -13 -1 2.41 0.2
 6 -13 -1 2.81 0.21
 6 13 -1 2.32 0.19
 -6 13 1 2.64 0.2
 6 13 -1 2.62 0.18
 6 13 -1 2.6 0.17
 6 13 -1 2.45 0.19
 -6 13 1 2.44 0.2
 -6 13 1 2.95 0.19
 6 13 -1 2.42 0.17
 6 13 -1 2.43 0.18
 -6 13 1 2.89 0.21
 6 13 -1 2.43 0.19
 5 -13 -1 6.17 0.46
 -5 -13 1 6.96 0.41
 -5 -13 1 7.23 0.44
 5 -13 -1 7.02 0.42
 -5 -13 1 6.6 0.41
 -5 -13 1 7.04 0.44
 -5 13 1 6.21 0.46
 5 13 -1 6.83 0.44
 5 13 -1 6.91 0.44
 5 13 -1 7.05 0.41
 5 13 -1 7.09 0.44
 -5 13 1 6.98 0.42
 5 13 -1 7.2 0.44
 5 13 -1 7.3 0.41
 -5 13 1 6.4 0.44
 4 -13 -1 6.92 0.4
 4 -13 -1 6.48 0.4
 -4 -13 1 6.04 0.38
 -4 -13 1 6.31 0.41
 -4 -13 1 6.2 0.41
 -4 -13 1 6.81 0.39
 -4 -13 1 6.46 0.42
 4 -13 -1 6.9 0.43
 4 13 -1 6.1 0.42
 4 13 -1 6.68 0.42
 -4 13 1 6.66 0.41
 -4 13 1 6.31 0.43
 -4 13 1 6.63 0.4
 -4 13 1 6.55 0.43
 4 13 -1 6.13 0.39
 -3 -13 1 1.48 0.12
 -3 -13 1 1.47 0.13
 3 -13 -1 1.2 0.14
 -3 -13 1 1.47 0.12
 3 -13 -1 1.21 0.12
 3 -13 -1 1.08 0.12
 -3 -13 1 1.26 0.12
 3 -13 -1 1.28 0.12
 -3 -13 1 1.43 0.11
 3 13 -1 1.3 0.11
 -3 13 1 1.41 0.12
 -3 13 1 1.17 0.12
 3 13 -1 1.26 0.12
 -3 13 1 1.12 0.12
 3 13 -1 1.27 0.12
 -3 13 1 1.33 0.12
 -3 13 1 1.33 0.13
 3 13 -1 1.21 0.11
 3 13 -1 1.26 0.11
 2 -13 -1 2.41 0.17
 -2 -13 1 2.2 0.16
 2 -13 -1 2.36 0.18
 -2 -13 1 2.38 0.18
 2 -13 -1 2.65 0.18
 2 -13 -1 2.68 0.19
 -2 -13 1 2.29 0.18
 -2 -13 1 2.14 0.17
 2 -13 -1 2.59 0.17
 2 13 -1 2.33 0.17
 2 13 -1 2.59 0.18
 2 13 -1 2.5 0.18
 -2 13 1 2.75 0.18
 -2 13 1 2.38 0.17
 2 13 -1 2.36 0.18
 2 13 -1 2.6 0.17
 -1 -13 1 2.21 0.16
 1 -13 -1 1.98 0.15
 -1 -13 1 2.03 0.15
 -1 -13 1 2.21 0.16
 1 -13 -1 1.94 0.16
 1 -13 -1 2.01 0.17
 1 -13 -1 2.25 0.15
 -1 -13 1 2.16 0.15
 1 13 -1 1.84 0.16
 1 13 -1 1.93 0.15
 1 13 -1 1.98 0.15
 -1 13 1 2.13 0.17
 -1 13 1 2 0.16
 -1 13 1 2.01 0.16
 -1 13 1 2.16 0.15
 -1 13 1 2.1 0.15
 0 -13 1 2 0.15
 0 -13 -1 1.71 0.14
 0 -13 -1 1.92 0.15
 0 -13 1 1.88 0.15
 0 -13 -1 1.79 0.15
 0 -13 -1 1.59 0.14
 0 -13 -1 2.16 0.16
 0 -13 1 1.93 0.14
 0 -13 1 1.85 0.14
 0 -13 1 2.03 0.13
 0 13 -1 1.76 0.15
 0 13 -1 2.16 0.14
 0 13 -1 1.78 0.15
 0 13 1 1.83 0.14
 0 13 1 1.85 0.15
 0 13 -1 1.8 0.15
 0 13 1 1.8 0.15
 0 13 1 1.75 0.14
 0 13 1 1.74 0.14
 1 -13 1 2.26 0.16
 -1 -13 -1 2.14 0.16
 -1 -13 -1 2.26 0.17
 1 -13 1 2.18 0.17
 -1 -13 -1 2.44 0.15
 1 -13 1 2.1 0.16
 -1 -13 -1 2.44 0.16
 1 -13 1 2.1 0.16
 1 -13 1 2.01 0.17
 1 13 1 2.03 0.17
 1 13 1 2.27 0.17
 -1 13 -1 2.27 0.18
 -1 13 -1 1.93 0.17
 1 13 1 2.03 0.15
 -1 13 -1 2.5 0.17
 1 13 1 2.29 0.16
 -1 13 -1 2.33 0.16
 2 -13 1 0.25 0.07
 -2 -13 -1 0.12 0.05
 2 -13 1 0.12 0.06
 -2 -13 -1 0.17 0.06
 -2 -13 -1 0.07 0.07
 2 -13 1 0.23 0.06
 2 -13 1 0.08 0.05
 -2 -13 -1 0.11 0.05
 2 -13 1 0.15 0.06
 -2 -13 -1 0.13 0.05
 -2 -13 -1 0.04 0.05
 2 13 1 0.11 0.06
 -2 13 -1 0.14 0.07
 -2 13 -1 0.21 0.06
 -2 13 -1 0.2 0.05
 2 13 1 0.15 0.05
 -2 13 -1 0.2 0.06
 2 13 1 0.1 0.05
 2 13 1 0.11 0.05
 -2 13 -1 0.16 0.07
 2 13 1 0.18 0.05
 -3 -13 -1 3.03 0.19
 3 -13 1 2.64 0.2
 -3 -13 -1 2.87 0.21
 3 -13 1 2.92 0.22
 -3 -13 -1 3.05 0.21
 3 -13 1 2.82 0.2
 -3 -13 -1 2.87 0.21
 3 13 1 3.1 0.19
 3 13 1 3.02 0.21
 -3 13 -1 2.75 0.2
 -3 13 -1 2.99 0.2
 3 13 1 2.88 0.21
 -3 13 -1 3.07 0.22
 -3 13 -1 2.61 0.21
 3 13 1 3.14 0.21
 3 13 1 2.94 0.19
 -4 -13 -1 0.29 0.05
 -4 -13 -1 0.41 0.09
 4 -13 1 0.3 0.08
 4 -13 1 0.29 0.08
 -4 -13 -1 0.23 0.05
 -4 -13 -1 0.28 0.06
 4 -13 1 0.3 0.08
 4 -13 1 0.38 0.09
 -4 -13 -1 0.29 0.08
 4 -13 1 0.25 0.06
 -4 13 -1 0.48 0.09
 -4 13 -1 0.21 0.06
 4 13 1 0.36 0.08
 4 13 1 0.3 0.07
 4 13 1 0.45 0.08
 -4 13 -1 0.32 0.08
 -4 13 -1 0.26 0.07
 4 13 1 0.29 0.05
 4 13 1 0.5 0.08
 -4 13 -1 0.32 0.07
 -5 -13 -1 0.07 0.04
 5 -13 1 -0.06 0.06
 -5 -13 -1 -0.01 0.06
 -5 -13 -1 0.13 0.06
 5 -13 1 0.07 0.06
 5 -13 1 0.07 0.07
 -5 -13 -1 0.01 0.05
 5 -13 1 0.04 0.06
 -5 -13 -1 0.1 0.08
 5 -13 1 0.1 0.07
 -5 -13 -1 0.1 0.06
 5 13 1 0.05 0.06
 -5 13 -1 0 0.06
 5 13 1 0.11 0.05
 5 13 1 -0.02 0.06
 5 13 1 0.1 0.05
 -5 13 -1 0.01 0.06
 5 13 1 0.07 0.05
 -5 13 -1 -0.04 0.07
 -5 13 -1 0.13 0.08
 -5 13 -1 0.04 0.06
 5 13 1 0.01 0.06
 5 13 1 0.14 0.05
 -6 -13 -1 0.07 0.05
 6 -13 1 0.11 0.06
 6 -13 1 -0.01 0.08
 6 -13 1 0.11 0.07
 6 -13 1 -0.02 0.07
 -6 -13 -1 0.07 0.06
 -6 -13 -1 0.04 0.06
 -6 -13 -1 0.05 0.06
 -6 -13 -1 0.13 0.04
 6 -13 1 -0.07 0.07
 -6 -13 -1 0.17 0.08
 -6 13 -1 0.07 0.06
 6 13 1 0.07 0.04
 -6 13 -1 0.02 0.06
 6 13 1 0.13 0.07
 6 13 1 0.04 0.05
 6 13 1 0.02 0.06
 -6 13 -1 0.15 0.06
 6 13 1 0.03 0.04
 -6 13 -1 0 0.08
 -6 13 -1 0.09 0.08
 6 13 1 0.09 0.06
 6 13 1 0.07 0.05
 -7 -13 -1 1.18 0.1
 7 -13 1 1.46 0.16
 7 -13 1 1.33 0.14
 -7 -13 -1 1.19 0.13
 -7 -13 -1 1.07 0.11
 7 -13 1 1.27 0.14
 -7 -13 -1 1.31 0.16
 7 -13 1 1.3 0.15
 7 -13 1 1.2 0.14
 -7 -13 -1 1.15 0.13
 -7 -13 -1 1.13 0.12
 7 13 1 1.14 0.1
 7 13 1 1.11 0.1
 -7 13 -1 1.26 0.12
 -7 13 -1 1.47 0.15
 -7 13 -1 1.17 0.16
 7 13 1 1.41 0.14
 7 13 1 1.13 0.12
 7 13 1 1.2 0.13
 7 13 1 1.12 0.1
 -7 13 -1 1.54 0.14
 7 13 1 1.14 0.11
 -8 -13 -1 0.96 0.14
 8 -13 1 1.15 0.17
 -8 -13 -1 1.02 0.09
 8 -13 1 1.16 0.14
 -8 -13 -1 1 0.12
 8 -13 1 0.98 0.13
 8 -13 1 0.76 0.13
 -8 -13 -1 1.02 0.13
 -8 -13 -1 0.99 0.12
 8 -13 1 1.05 0.13
 -8 -13 -1 1.01 0.14
 8 13 1 0.73 0.13
 8 13 1 1.01 0.14
 -8 13 -1 1.04 0.15
 -8 13 -1 0.84 0.16
 -8 13 -1 1.03 0.13
 8 13 1 1 0.09
 8 13 1 1.09 0.14
 -8 13 -1 1.11 0.16
 -9 -13 -1 0.38 0.12
 9 -13 1 0.23 0.09
 -9 -13 -1 0.61 0.14
 -9 -13 -1 0.3 0.07
 -9 -13 -1 0.23 0.07
 9 -13 1 0.23 0.1
 -9 -13 -1 0.24 0.07
 9 -13 1 0.23 0.08
 9 -13 1 0.29 0.1
 9 -13 1 0.31 0.08
 9 13 1 0.26 0.1
 9 13 1 0.31 0.07
 -9 13 -1 0.35 0.08
 9 13 1 0.44 0.08
 -9 13 -1 0.26 0.1
 9 13 1 0.35 0.09
 -9 13 -1 0.33 0.11
 -9 13 -1 0.33 0.12
 10 -13 1 0.16 0.11
 10 -13 1 0.21 0.09
 -10 -13 -1 0.03 0.07
 -10 -13 -1 0.01 0.07
 10 -13 1 0.14 0.09
 10 -13 1 0.1 0.12
 10 -13 1 0.11 0.1
 -10 -13 -1 0.09 0.07
 -10 -13 -1 0.03 0.1
 -10 -13 -1 -0.05 0.11
 -10 13 -1 -0.05 0.1
 10 13 1 0.19 0.09
 10 13 1 0.12 0.04
 -10 13 -1 0.21 0.13
 -10 13 -1 -0.1 0.11
 10 13 1 0.13 0.04
 -10 13 -1 0.07 0.08
 10 13 1 -0.02 0.11
 11 -13 1 0.17 0.1
 11 -13 1 0.18 0.09
 -11 -13 -1 0.17 0.08
 11 -13 1 0.21 0.12
 -11 -13 -1 0.19 0.08
 11 -13 1 0.35 0.1
 11 -13 1 0.29 0.12
 11 13 1 0.16 0.13
 -11 13 -1 0.19 0.14
 -11 13 -1 0.09 0.11
 -11 13 -1 0.03 0.11
 11 13 1 0.12 0.1
 12 -13 1 0.07 0.14
 -12 -13 -1 0.06 0.08
 -12 -13 -1 0.26 0.14
 -12 -13 -1 0.13 0.09
 12 -13 1 0.04 0.13
 12 -13 1 0 0.09
 12 -13 1 0.21 0.12
 12 -13 1 0.1 0.1
 -12 13 -1 -0.01 0.12
 12 13 1 -0.15 0.11
 12 13 1 -0.11 0.14
 13 -13 1 0.07 0.09
 -13 -13 -1 -0.16 0.14
 -13 13 -1 0.27 0.14
 13 13 1 0.29 0.18
 13 13 1 0.02 0.11
 -13 13 -1 0.09 0.15
 14 -13 1 -0.13 0.11
 14 -13 1 -0.08 0.1
 -14 -13 -1 -0.05 0.15
 -14 13 -1 0.16 0.17
 -14 13 -1 0.15 0.16
 -15 -14 1 0.39 0.18
 15 -14 -1 0.09 0.11
 15 -14 -1 0.14 0.13
 -15 14 1 0.23 0.17
 -14 -14 1 0.13 0.18
 14 -14 -1 -0.07 0.1
 -14 14 1 0.01 0.15
 -14 14 1 -0.11 0.16
 13 -14 -1 -0.03 0.1
 -13 -14 1 0.12 0.16
 13 -14 -1 0.06 0.09
 -13 14 1 0.12 0.13
 -13 14 1 0.11 0.14
 12 -14 -1 0.33 0.14
 12 -14 -1 0.55 0.13
 12 -14 -1 0.23 0.1
 -12 -14 1 0.39 0.08
 12 -14 -1 0.43 0.1
 -12 14 1 0.52 0.13
 -12 14 1 0.13 0.12
 -12 14 1 0.56 0.15
 11 -14 -1 0.6 0.14
 11 -14 -1 0.49 0.13
 -11 -14 1 0.6 0.12
 11 -14 -1 0.4 0.1
 -11 -14 1 0.53 0.14
 11 -14 -1 0.57 0.13
 -11 -14 1 0.51 0.08
 -11 -14 1 0.56 0.12
 11 14 -1 0.41 0.12
 -11 14 1 0.76 0.16
 11 14 -1 0.52 0.14
 -11 14 1 0.79 0.17
 -11 14 1 0.4 0.12
 -11 14 1 0.48 0.13
 10 -14 -1 0.18 0.11
 10 -14 -1 -0.03 0.08
 -10 -14 1 0.07 0.12
 10 -14 -1 0.08 0.08
 10 -14 -1 0.16 0.11
 -10 -14 1 0.07 0.05
 10 -14 -1 -0.04 0.1
 -10 -14 1 0.06 0.07
 -10 -14 1 0.09 0.1
 -10 14 1 0.05 0.09
 10 14 -1 0.15 0.1
 -10 14 1 0.13 0.11
 10 14 -1 -0.17 0.11
 -10 14 1 0.06 0.1
 -10 14 1 0.14 0.1
 -9 -14 1 0.24 0.11
 9 -14 -1 0.25 0.09
 9 -14 -1 0.04 0.1
 -9 -14 1 0.18 0.09
 9 -14 -1 0.21 0.08
 9 -14 -1 0.14 0.08
 -9 -14 1 0.18 0.06
 9 -14 -1 0.23 0.11
 -9 -14 1 0.29 0.06
 -9 -14 1 0.16 0.06
 9 14 -1 0.13 0.04
 9 14 -1 0.13 0.09
 9 14 -1 -0.01 0.09
 -9 14 1 0.13 0.09
 9 14 -1 0.18 0.1
 -9 14 1 0.07 0.09
 -9 14 1 0.27 0.1
 9 14 -1 0.13 0.03
 -9 14 1 0.31 0.08
 -8 -14 1 0.15 0.06
 -8 -14 1 0.07 0.05
 8 -14 -1 0.09 0.1
 8 -14 -1 0.26 0.08
 -8 -14 1 0.24 0.06
 8 -14 -1 -0.01 0.08
 -8 -14 1 0.09 0.09
 -8 -14 1 0.18 0.04
 8 -14 -1 0.18 0.09
 -8 -14 1 0.11 0.08
 8 -14 -1 0.01 0.07
 -8 14 1 0.19 0.06
 8 14 -1 0.19 0.04
 -8 14 1 0.24 0.1
 8 14 -1 0.16 0.09
 8 14 -1 0.24 0.05
 8 14 -1 0.15 0.09
 -8 14 1 0.24 0.1
 -8 14 1 0.06 0.08
 -8 14 1 0.2 0.06
 8 14 -1 0.1 0.08
 -8 14 1 0.08 0.09
 -7 -14 1 1.13 0.14
 -7 -14 1 1.28 0.1
 7 -14 -1 1.19 0.15
 -7 -14 1 1.23 0.12
 7 -14 -1 1.56 0.14
 7 -14 -1 1.41 0.14
 7 -14 -1 1.58 0.15
 -7 -14 1 1.11 0.12
 -7 -14 1 1.28 0.14
 -7 -14 1 1.16 0.12
 -7 14 1 1.41 0.12
 7 14 -1 1.33 0.13
 7 14 -1 1.09 0.14
 7 14 -1 1.23 0.11
 -7 14 1 1.6 0.14
 7 14 -1 1.15 0.09
 -7 14 1 1.26 0.13
 -7 14 1 1.43 0.16
 7 14 -1 1.3 0.1
 -7 14 1 1.53 0.14
 7 14 -1 1.27 0.14
 -6 -14 1 20.72 1.19
 6 -14 -1 19.46 1.26
 -6 -14 1 21.83 1.26
 6 -14 -1 20.92 1.2
 6 -14 -1 20.45 1.3
 -6 -14 1 21 1.19
 -6 -14 1 19.83 1.29
 -6 -14 1 21 1.26
 6 -14 -1 21.75 1.21
 6 14 -1 21 1.28
 -6 14 1 20.1 1.26
 -6 14 1 19.65 1.2
 6 14 -1 20.77 1.29
 6 14 -1 20.54 1.26
 6 14 -1 20.22 1.19
 -6 14 1 20.87 1.3
 6 14 -1 21.31 1.26
 -6 14 1 19.88 1.3
 5 -14 -1 1.8 0.15
 5 -14 -1 1.86 0.16
 -5 -14 1 1.96 0.15
 -5 -14 1 2.16 0.16
 5 -14 -1 1.67 0.17
 -5 -14 1 2.15 0.13
 5 -14 -1 1.73 0.17
 5 -14 -1 1.72 0.16
 -5 -14 1 1.91 0.15
 5 14 -1 1.89 0.14
 -5 14 1 2.03 0.17
 -5 14 1 1.77 0.18
 -5 14 1 1.87 0.17
 5 14 -1 2.01 0.14
 -5 14 1 2.01 0.16
 5 14 -1 1.82 0.15
 5 14 -1 1.83 0.15
 -5 14 1 1.81 0.15
 4 -14 -1 0.1 0.07
 -4 -14 1 0.16 0.05
 -4 -14 1 0.11 0.05
 -4 -14 1 0.1 0.06
 4 -14 -1 -0.01 0.07
 4 -14 -1 0.1 0.08
 4 -14 -1 0.2 0.05
 -4 -14 1 0.14 0.05
 -4 -14 1 0.19 0.08
 -4 14 1 0.13 0.06
 4 14 -1 0.09 0.07
 4 14 -1 0.07 0.05
 4 14 -1 0.17 0.05
 -4 14 1 0.15 0.07
 -4 14 1 0.19 0.08
 4 14 -1 0.08 0.05
 -4 14 1 0.16 0.06
 4 14 -1 0.23 0.05
 -4 14 1 0.12 0.07
 3 -14 -1 2.91 0.19
 -3 -14 1 2.55 0.18
 3 -14 -1 2.53 0.2
 3 -14 -1 2.83 0.19
 3 -14 -1 2.46 0.19
 -3 -14 1 2.27 0.18
 -3 -14 1 2.21 0.19
 -3 -14 1 2.2 0.17
 -3 -14 1 2.62 0.18
 3 -14 -1 2.65 0.19
 -3 14 1 2.61 0.18
 -3 14 1 2.8 0.2
 -3 14 1 2.61 0.19
 3 14 -1 2.37 0.17
 3 14 -1 2.36 0.18
 3 14 -1 2.44 0.2
 3 14 -1 2.48 0.18
 2 -14 -1 10.88 0.7
 -2 -14 1 11.7 0.69
 2 -14 -1 10.79 0.71
 -2 -14 1 11.23 0.7
 -2 -14 1 11 0.65
 -2 -14 1 10.8 0.7
 2 14 -1 10.3 0.7
 2 14 -1 11.26 0.69
 2 14 -1 10.69 0.65
 -2 14 1 11.58 0.69
 -2 14 1 11.69 0.65
 -2 14 1 10.51 0.7
 -2 14 1 10.99 0.71
 2 14 -1 10.97 0.7
 1 -14 -1 0.07 0.06
 -1 -14 1 -0.02 0.05
 -1 -14 1 0.05 0.05
 -1 -14 1 0.05 0.05
 1 -14 -1 0.04 0.06
 1 -14 -1 0.02 0.06
 1 -14 -1 0.1 0.06
 -1 -14 1 0.06 0.06
 -1 -14 1 0.04 0.06
 1 14 -1 0.07 0.06
 -1 14 1 0.11 0.05
 -1 14 1 0.03 0.06
 -1 14 1 0.05 0.06
 -1 14 1 0.13 0.06
 -1 14 1 0.07 0.06
 1 14 -1 0.02 0.05
 1 14 -1 0.08 0.05
 1 14 -1 0.06 0.05
 1 14 -1 0.01 0.06
 0 -14 -1 1.33 0.11
 0 -14 1 1.28 0.12
 0 -14 1 1.46 0.13
 0 -14 -1 1.56 0.14
 0 -14 -1 1.23 0.13
 0 -14 1 1.43 0.14
 0 -14 -1 1.31 0.12
 0 -14 1 1.16 0.12
 0 -14 1 1.34 0.11
 0 -14 -1 1.45 0.13
 0 14 1 1.22 0.13
 0 14 -1 1.13 0.12
 0 14 1 1.27 0.13
 0 14 -1 1.45 0.13
 0 14 -1 1.38 0.12
 0 14 -1 1.37 0.12
 0 14 -1 1.56 0.13
 0 14 1 1.26 0.11
 0 14 1 1.33 0.12
 0 14 1 1.3 0.12
 -1 -14 -1 0.21 0.06
 1 -14 1 0.41 0.09
 1 -14 1 0.51 0.09
 1 -14 1 0.3 0.07
 1 -14 1 0.2 0.06
 -1 -14 -1 0.22 0.06
 1 -14 1 0.41 0.07
 -1 -14 -1 0.29 0.06
 -1 -14 -1 0.45 0.1
 -1 14 -1 0.45 0.09
 1 14 1 0.29 0.07
 1 14 1 0.43 0.09
 1 14 1 0.34 0.07
 -1 14 -1 0.57 0.1
 -1 14 -1 0.43 0.09
 1 14 1 0.34 0.07
 1 14 1 0.35 0.07
 -2 -14 -1 7.77 0.46
 -2 -14 -1 6.97 0.45
 2 -14 1 7.37 0.46
 2 -14 1 7.47 0.48
 2 -14 1 7.52 0.5
 -2 -14 -1 7.62 0.48
 -2 -14 -1 7.52 0.49
 -2 14 -1 7.31 0.46
 2 14 1 7.92 0.49
 -2 14 -1 8.19 0.48
 -2 14 -1 7.74 0.46
 -2 14 -1 7.33 0.5
 2 14 1 7.87 0.45
 2 14 1 7.47 0.48
 -2 14 -1 7.8 0.49
 2 14 1 7.59 0.49
 3 -14 1 0.03 0.07
 3 -14 1 0.03 0.07
 3 -14 1 0.11 0.05
 -3 -14 -1 -0.03 0.06
 -3 -14 -1 0.13 0.05
 -3 -14 -1 0.01 0.06
 -3 -14 -1 0.02 0.08
 3 -14 1 0.08 0.07
 3 -14 1 0 0.06
 -3 -14 -1 0.08 0.05
 -3 -14 -1 0.03 0.04
 3 14 1 0.02 0.06
 -3 14 -1 -0.05 0.06
 -3 14 -1 0.1 0.06
 3 14 1 0 0.05
 3 14 1 -0.03 0.05
 -3 14 -1 0.02 0.07
 -3 14 -1 0.01 0.05
 -3 14 -1 -0.05 0.07
 3 14 1 0.04 0.05
 3 14 1 0.05 0.06
 4 -14 1 0.19 0.07
 -4 -14 -1 0.43 0.09
 -4 -14 -1 0.25 0.07
 4 -14 1 0.26 0.07
 4 -14 1 0.23 0.08
 -4 -14 -1 0.28 0.06
 -4 -14 -1 0.31 0.06
 -4 -14 -1 0.38 0.08
 4 -14 1 0.3 0.08
 4 14 1 0.35 0.06
 4 14 1 0.3 0.06
 -4 14 -1 0.17 0.07
 4 14 1 0.28 0.06
 -4 14 -1 0.15 0.06
 -4 14 -1 0.08 0.08
 -4 14 -1 0.28 0.07
 4 14 1 0.21 0.07
 4 14 1 0.24 0.06
 -5 -14 -1 0.07 0.08
 5 -14 1 0.03 0.06
 -5 -14 -1 0.01 0.06
 -5 -14 -1 0.1 0.06
 5 -14 1 -0.13 0.07
 -5 -14 -1 -0.03 0.06
 -5 -14 -1 -0.01 0.05
 5 -14 1 -0.1 0.07
 5 -14 1 -0.03 0.08
 5 -14 1 0 0.06
 -5 -14 -1 0.05 0.05
 -5 14 -1 -0.03 0.06
 -5 14 -1 0.01 0.06
 5 14 1 0.07 0.05
 -5 14 -1 0.02 0.06
 -5 14 -1 0.12 0.09
 5 14 1 0.05 0.06
 -5 14 -1 -0.01 0.07
 5 14 1 0.06 0.06
 5 14 1 0.09 0.05
 5 14 1 0.09 0.06
 5 14 1 -0.01 0.06
 5 14 1 0.03 0.05
 6 -14 1 0.35 0.07
 6 -14 1 0.2 0.09
 6 -14 1 0.33 0.08
 -6 -14 -1 0.43 0.07
 -6 -14 -1 0.33 0.07
 -6 -14 -1 0.35 0.07
 -6 -14 -1 0.37 0.11
 6 -14 1 0.19 0.08
 -6 -14 -1 0.27 0.06
 -6 -14 -1 0.44 0.09
 6 -14 1 0.22 0.08
 -6 14 -1 0.17 0.07
 6 14 1 0.29 0.05
 -6 14 -1 0.14 0.08
 6 14 1 0.44 0.09
 6 14 1 0.28 0.06
 -6 14 -1 0.46 0.1
 6 14 1 0.3 0.06
 -6 14 -1 0.45 0.1
 -6 14 -1 0.26 0.07
 6 14 1 0.35 0.07
 6 14 1 0.23 0.08
 6 14 1 0.25 0.06
 -7 -14 -1 1.07 0.12
 -7 -14 -1 1.14 0.1
 7 -14 1 1.15 0.15
 -7 -14 -1 1.4 0.15
 -7 -14 -1 1.48 0.14
 -7 -14 -1 1.13 0.14
 -7 -14 -1 1.26 0.13
 7 -14 1 1.35 0.16
 7 -14 1 1.08 0.13
 7 -14 1 1.07 0.16
 7 -14 1 1.11 0.14
 7 14 1 1.04 0.11
 7 14 1 1.29 0.11
 -7 14 -1 1.1 0.16
 7 14 1 1.46 0.14
 -7 14 -1 1.27 0.13
 7 14 1 1.24 0.13
 -7 14 -1 1.36 0.17
 7 14 1 1.43 0.11
 7 14 1 1.16 0.14
 -7 14 -1 1.1 0.13
 7 14 1 1.24 0.1
 -7 14 -1 1.15 0.12
 8 -14 1 0.27 0.1
 8 -14 1 0.17 0.08
 -8 -14 -1 0.3 0.06
 8 -14 1 0.09 0.07
 8 -14 1 0.23 0.11
 -8 -14 -1 0.26 0.07
 -8 -14 -1 0.18 0.09
 -8 -14 -1 0.26 0.07
 8 -14 1 0.19 0.09
 -8 -14 -1 0.24 0.07
 -8 -14 -1 0.26 0.12
 8 14 1 0.31 0.09
 -8 14 -1 0.13 0.1
 -8 14 -1 0.29 0.11
 8 14 1 0.21 0.04
 8 14 1 0.21 0.09
 8 14 1 0.21 0.05
 8 14 1 0.3 0.05
 -8 14 -1 0.21 0.08
 -8 14 -1 0.13 0.09
 -9 -14 -1 0.59 0.14
 9 -14 1 0.58 0.14
 -9 -14 -1 0.58 0.13
 -9 -14 -1 0.57 0.11
 -9 -14 -1 0.51 0.09
 9 -14 1 0.63 0.13
 -9 -14 -1 0.72 0.16
 9 -14 1 0.74 0.17
 9 -14 1 0.42 0.1
 9 -14 1 0.59 0.12
 9 14 1 0.71 0.09
 9 14 1 0.58 0.08
 -9 14 -1 0.73 0.14
 -9 14 -1 0.65 0.13
 -9 14 -1 0.55 0.11
 -9 14 -1 0.63 0.14
 9 14 1 0.59 0.14
 9 14 1 0.64 0.14
 10 -14 1 0.33 0.12
 -10 -14 -1 0.3 0.11
 -10 -14 -1 0.22 0.08
 10 -14 1 0.38 0.12
 -10 -14 -1 0.24 0.13
 -10 -14 -1 0.29 0.09
 10 -14 1 0.52 0.1
 -10 -14 -1 0.34 0.08
 10 -14 1 0.28 0.1
 10 -14 1 0.35 0.1
 -10 14 -1 0.44 0.09
 -10 14 -1 0.19 0.12
 -10 14 -1 0.36 0.11
 10 14 1 0.28 0.1
 -10 14 -1 0.34 0.14
 10 14 1 0.33 0.05
 10 14 1 0.31 0.05
 10 14 1 0.3 0.12
 11 -14 1 0.39 0.14
 11 -14 1 0.65 0.16
 11 -14 1 0.51 0.13
 11 -14 1 0.4 0.11
 -11 -14 -1 0.26 0.13
 -11 -14 -1 0.32 0.09
 -11 -14 -1 0.28 0.09
 11 -14 1 0.4 0.1
 11 14 1 0.09 0.1
 -11 14 -1 0.41 0.15
 -11 14 -1 0.41 0.1
 11 14 1 0.36 0.14
 -11 14 -1 0.27 0.12
 -11 14 -1 0.38 0.14
 -12 -14 -1 1.1 0.14
 12 -14 1 0.81 0.16
 12 -14 1 0.95 0.18
 -12 -14 -1 1.08 0.19
 12 -14 1 0.67 0.16
 12 -14 1 0.79 0.16
 12 -14 1 0.84 0.2
 -12 14 -1 0.69 0.16
 12 14 1 0.89 0.21
 12 14 1 0.83 0.18
 -12 14 -1 0.64 0.15
 13 -14 1 -0.02 0.1
 -13 -14 -1 -0.03 0.15
 13 -14 1 -0.02 0.09
 -13 14 -1 0.27 0.15
 13 14 1 -0.06 0.11
 -13 14 -1 -0.03 0.15
 14 -14 1 0.12 0.1
 -14 -14 -1 -0.11 0.16
 14 -14 1 0.02 0.11
 -14 14 -1 0.32 0.18
 -14 14 -1 0.21 0.17
 15 -15 -1 -0.04 0.1
 15 -15 -1 -0.02 0.13
 -15 -15 1 0.2 0.18
 -15 15 1 0.04 0.16
 -14 -15 1 -0.08 0.16
 14 -15 -1 -0.08 0.11
 14 -15 -1 -0.2 0.1
 -14 15 1 0.16 0.14
 -14 15 1 -0.1 0.15
 -13 -15 1 -0.05 0.16
 13 -15 -1 0.04 0.1
 -13 15 1 -0.03 0.14
 -13 15 1 -0.17 0.13
 -12 -15 1 0.09 0.05
 12 -15 -1 -0.12 0.14
 12 -15 -1 0.09 0.13
 -12 -15 1 0.09 0.08
 -12 -15 1 -0.02 0.14
 -12 -15 1 0.02 0.08
 12 -15 -1 0.09 0.13
 12 -15 -1 0.04 0.09
 12 -15 -1 -0.03 0.1
 -12 15 1 0.25 0.13
 -12 15 1 0.06 0.15
 -12 15 1 0.08 0.13
 -11 -15 1 0.55 0.09
 11 -15 -1 0.61 0.14
 11 -15 -1 0.45 0.13
 -11 -15 1 0.35 0.08
 -11 -15 1 0.38 0.14
 11 -15 -1 0.28 0.1
 11 -15 -1 0.53 0.13
 -11 -15 1 0.4 0.09
 11 -15 -1 0.38 0.1
 -11 -15 1 0.6 0.14
 -11 15 1 0.55 0.12
 11 15 -1 0.27 0.15
 -11 15 1 0.62 0.14
 -11 15 1 0.26 0.12
 10 -15 -1 0.24 0.09
 10 -15 -1 0.34 0.11
 -10 -15 1 0.31 0.12
 -10 -15 1 0.26 0.06
 10 -15 -1 0.34 0.12
 10 -15 -1 0.3 0.12
 -10 -15 1 0.31 0.12
 10 -15 -1 0.39 0.09
 -10 -15 1 0.23 0.08
 10 15 -1 0.52 0.11
 10 15 -1 0.3 0.13
 -10 15 1 0.34 0.1
 -10 15 1 0.4 0.1
 -10 15 1 0.45 0.12
 -10 15 1 0.1 0.1
 9 -15 -1 0.73 0.13
 -9 -15 1 0.53 0.11
 9 -15 -1 0.83 0.15
 -9 -15 1 0.52 0.12
 9 -15 -1 0.76 0.14
 9 -15 -1 0.64 0.12
 9 -15 -1 0.86 0.16
 -9 -15 1 0.56 0.1
 -9 -15 1 0.9 0.17
 -9 15 1 0.86 0.17
 9 15 -1 0.61 0.07
 -9 15 1 0.97 0.14
 9 15 -1 0.67 0.08
 9 15 -1 0.83 0.17
 -9 15 1 0.78 0.13
 9 15 -1 1.01 0.15
 -9 15 1 0.67 0.16
 8 -15 -1 1.77 0.17
 -8 -15 1 1.73 0.15
 -8 -15 1 1.89 0.16
 -8 -15 1 1.86 0.19
 8 -15 -1 1.68 0.19
 8 -15 -1 1.59 0.18
 -8 -15 1 2.01 0.18
 8 -15 -1 1.88 0.2
 -8 -15 1 1.75 0.13
 8 -15 -1 1.66 0.16
 8 15 -1 1.92 0.13
 -8 15 1 1.9 0.19
 -8 15 1 1.69 0.17
 8 15 -1 1.88 0.12
 -8 15 1 1.62 0.19
 8 15 -1 1.65 0.16
 8 15 -1 1.97 0.18
 8 15 -1 1.55 0.17
 -8 15 1 1.64 0.18
 7 -15 -1 1.13 0.13
 -7 -15 1 0.95 0.14
 -7 -15 1 0.91 0.12
 -7 -15 1 0.98 0.11
 -7 -15 1 0.82 0.13
 7 -15 -1 0.79 0.13
 -7 -15 1 0.99 0.08
 7 -15 -1 0.95 0.15
 -7 -15 1 1 0.11
 7 -15 -1 0.9 0.13
 -7 15 1 0.79 0.12
 7 15 -1 0.9 0.08
 -7 15 1 1.02 0.11
 7 15 -1 1.07 0.1
 7 15 -1 0.74 0.12
 7 15 -1 0.94 0.13
 -7 15 1 0.94 0.12
 7 15 -1 1.01 0.14
 7 15 -1 0.86 0.09
 -7 15 1 1.11 0.15
 -7 15 1 0.96 0.13
 7 15 -1 0.88 0.09
 -7 15 1 0.93 0.15
 -6 -15 1 0.4 0.1
 -6 -15 1 0.54 0.1
 6 -15 -1 0.07 0.08
 6 -15 -1 0.3 0.07
 6 -15 -1 0.27 0.09
 -6 -15 1 0.5 0.11
 -6 -15 1 0.42 0.09
 6 -15 -1 0.19 0.09
 -6 -15 1 0.49 0.09
 6 -15 -1 0.23 0.08
 6 15 -1 0.36 0.07
 6 15 -1 0.43 0.08
 6 15 -1 0.49 0.1
 -6 15 1 0.28 0.09
 6 15 -1 0.29 0.07
 6 15 -1 0.31 0.08
 6 15 -1 0.39 0.09
 -6 15 1 0.28 0.07
 -6 15 1 0.31 0.07
 6 15 -1 0.49 0.08
 -6 15 1 0.16 0.08
 -6 15 1 0.28 0.08
 -5 -15 1 0.01 0.06
 -5 -15 1 0.02 0.05
 5 -15 -1 -0.06 0.07
 -5 -15 1 0.04 0.08
 5 -15 -1 0.06 0.05
 -5 -15 1 0 0.06
 -5 -15 1 0.09 0.04
 5 -15 -1 -0.07 0.07
 5 -15 -1 -0.08 0.08
 -5 -15 1 0.02 0.06
 5 15 -1 -0.02 0.05
 5 15 -1 0.04 0.07
 -5 15 1 0.02 0.06
 -5 15 1 0 0.07
 5 15 -1 -0.06 0.05
 -5 15 1 -0.02 0.08
 5 15 -1 -0.01 0.05
 -5 15 1 -0.12 0.07
 5 15 -1 -0.04 0.04
 -5 15 1 -0.08 0.06
 -4 -15 1 0.52 0.1
 4 -15 -1 0.26 0.08
 -4 -15 1 0.58 0.1
 -4 -15 1 0.42 0.1
 4 -15 -1 0.56 0.1
 4 -15 -1 0.32 0.08
 -4 -15 1 0.57 0.08
 4 -15 -1 0.25 0.08
 4 -15 -1 0.24 0.08
 -4 -15 1 0.57 0.09
 4 15 -1 0.45 0.08
 -4 15 1 0.44 0.09
 4 15 -1 0.49 0.1
 4 15 -1 0.53 0.09
 4 15 -1 0.56 0.09
 -4 15 1 0.27 0.08
 -4 15 1 0.36 0.07
 4 15 -1 0.38 0.06
 -4 15 1 0.27 0.08
 3 -15 -1 4.45 0.27
 -3 -15 1 3.94 0.27
 3 -15 -1 4.13 0.27
 -3 -15 1 4.04 0.27
 -3 -15 1 3.78 0.26
 3 -15 -1 4.11 0.27
 3 -15 -1 4.06 0.29
 3 -15 -1 4.26 0.29
 -3 -15 1 3.99 0.28
 -3 -15 1 4.18 0.28
 3 15 -1 4.11 0.28
 -3 15 1 3.99 0.26
 -3 15 1 4.45 0.29
 3 15 -1 3.79 0.28
 3 15 -1 4.26 0.26
 -3 15 1 4.24 0.27
 3 15 -1 3.72 0.28
 3 15 -1 3.71 0.26
 -3 15 1 4.26 0.28
 2 -15 -1 0.16 0.06
 2 -15 -1 0.2 0.06
 -2 -15 1 0.09 0.05
 2 -15 -1 0.22 0.07
 2 -15 -1 0.17 0.08
 -2 -15 1 0.06 0.06
 -2 -15 1 0.11 0.06
 2 -15 -1 0.17 0.07
 -2 -15 1 0.15 0.06
 -2 15 1 0.21 0.06
 -2 15 1 0.1 0.07
 2 15 -1 0.15 0.06
 -2 15 1 0.12 0.07
 2 15 -1 0.14 0.07
 2 15 -1 0.11 0.06
 -2 15 1 0.21 0.08
 2 15 -1 0.16 0.07
 -2 15 1 0.19 0.07
 1 -15 -1 1.09 0.13
 -1 -15 1 1.19 0.13
 1 -15 -1 1.12 0.11
 1 -15 -1 1.39 0.12
 -1 -15 1 0.82 0.11
 -1 -15 1 0.9 0.12
 -1 -15 1 1.08 0.12
 1 -15 -1 1 0.12
 1 15 -1 1.13 0.12
 -1 15 1 1.19 0.12
 1 15 -1 0.92 0.11
 -1 15 1 1.26 0.12
 1 15 -1 1.23 0.12
 -1 15 1 1.2 0.12
 1 15 -1 1.1 0.12
 -1 15 1 1.35 0.13
 0 -15 -1 0.3 0.07
 0 -15 1 0.38 0.08
 0 -15 -1 0.57 0.1
 0 -15 1 0.17 0.06
 0 -15 1 0.3 0.06
 0 -15 -1 0.41 0.08
 0 -15 1 0.27 0.07
 0 -15 1 0.49 0.09
 0 -15 -1 0.3 0.08
 0 15 -1 0.54 0.1
 0 15 -1 0.27 0.07
 0 15 1 0.45 0.1
 0 15 1 0.43 0.08
 0 15 1 0.39 0.08
 0 15 -1 0.26 0.07
 0 15 1 0.46 0.1
 0 15 -1 0.53 0.11
 0 15 -1 0.26 0.06
 0 15 1 0.41 0.08
 -1 -15 -1 0.23 0.06
 1 -15 1 0.15 0.06
 -1 -15 -1 0.19 0.06
 -1 -15 -1 0.17 0.07
 -1 -15 -1 0.17 0.06
 -1 -15 -1 0.19 0.07
 1 -15 1 0.1 0.05
 1 -15 1 0.26 0.07
 1 -15 1 0.36 0.07
 1 15 1 0.23 0.06
 1 15 1 0.3 0.07
 1 15 1 0.23 0.07
 1 15 1 0.19 0.06
 1 15 1 0.28 0.07
 -1 15 -1 0.23 0.07
 -1 15 -1 0.34 0.08
 -1 15 -1 0.23 0.06
 2 -15 1 2.37 0.18
 2 -15 1 2.51 0.2
 -2 -15 -1 2.37 0.18
 2 -15 1 2.62 0.17
 -2 -15 -1 2.15 0.18
 -2 -15 -1 2.23 0.17
 -2 -15 -1 2.39 0.17
 2 -15 1 2.31 0.18
 2 15 1 1.99 0.17
 -2 15 -1 2.41 0.18
 -2 15 -1 2.51 0.18
 2 15 1 2.21 0.18
 2 15 1 2.18 0.17
 2 15 1 2.17 0.19
 -2 15 -1 2.46 0.19
 -2 15 -1 2.39 0.17
 3 -15 1 2.82 0.23
 3 -15 1 2.93 0.21
 3 -15 1 3.08 0.22
 3 -15 1 2.97 0.21
 -3 -15 -1 2.86 0.21
 -3 -15 -1 2.52 0.21
 -3 -15 -1 2.83 0.22
 -3 -15 -1 3.02 0.2
 -3 -15 -1 3.28 0.22
 3 -15 1 2.86 0.22
 -3 15 -1 2.91 0.22
 -3 15 -1 2.99 0.21
 3 15 1 3.14 0.22
 -3 15 -1 2.91 0.2
 3 15 1 2.66 0.21
 3 15 1 2.79 0.21
 -3 15 -1 3.09 0.21
 -3 15 -1 3.09 0.23
 3 15 1 2.73 0.19
 4 -15 1 2.21 0.19
 4 -15 1 2.36 0.21
 -4 -15 -1 2.79 0.2
 -4 -15 -1 2.72 0.18
 4 -15 1 2.38 0.2
 -4 -15 -1 2.57 0.19
 -4 -15 -1 2.73 0.2
 -4 -15 -1 2.86 0.2
 -4 15 -1 2.14 0.2
 4 15 1 2.54 0.2
 4 15 1 2.83 0.2
 -4 15 -1 2.46 0.19
 -4 15 -1 2.29 0.18
 4 15 1 2.71 0.18
 -4 15 -1 2.25 0.21
 4 15 1 2.78 0.19
 4 15 1 2.63 0.18
 -5 -15 -1 -0.04 0.05
 5 -15 1 -0.07 0.06
 -5 -15 -1 -0.04 0.07
 -5 -15 -1 0.01 0.06
 -5 -15 -1 0.04 0.08
 -5 -15 -1 0.04 0.05
 5 -15 1 -0.07 0.06
 5 -15 1 -0.09 0.07
 -5 -15 -1 0 0.06
 5 -15 1 -0.03 0.08
 5 -15 1 -0.12 0.09
 5 15 1 0.02 0.06
 5 15 1 -0.01 0.07
 -5 15 -1 -0.07 0.06
 -5 15 -1 -0.01 0.07
 5 15 1 0.06 0.05
 5 15 1 0.07 0.05
 -5 15 -1 -0.04 0.06
 -5 15 -1 -0.09 0.08
 5 15 1 -0.01 0.05
 6 -15 1 1.39 0.15
 -6 -15 -1 1.34 0.13
 6 -15 1 1.37 0.16
 6 -15 1 1.33 0.14
 -6 -15 -1 1.53 0.15
 -6 -15 -1 1.39 0.14
 6 -15 1 1.21 0.16
 6 -15 1 1.01 0.15
 -6 -15 -1 1.28 0.13
 -6 -15 -1 1.26 0.14
 -6 -15 -1 1.24 0.11
 -6 15 -1 1.43 0.14
 6 15 1 1.55 0.14
 6 15 1 1.3 0.12
 -6 15 -1 1.16 0.13
 -6 15 -1 1.05 0.16
 6 15 1 1.35 0.12
 6 15 1 1.32 0.13
 6 15 1 1.27 0.11
 6 15 1 1.37 0.14
 6 15 1 1.13 0.12
 -6 15 -1 1.24 0.17
 7 -15 1 0.83 0.13
 -7 -15 -1 0.47 0.11
 7 -15 1 0.62 0.12
 7 -15 1 0.79 0.13
 -7 -15 -1 0.75 0.14
 -7 -15 -1 0.57 0.08
 -7 -15 -1 0.63 0.12
 7 -15 1 0.39 0.1
 -7 -15 -1 0.53 0.11
 -7 -15 -1 0.84 0.14
 7 -15 1 0.75 0.13
 7 15 1 0.68 0.12
 -7 15 -1 1.02 0.16
 7 15 1 0.65 0.1
 7 15 1 0.72 0.11
 -7 15 -1 0.56 0.11
 7 15 1 0.7 0.09
 -7 15 -1 0.86 0.15
 7 15 1 0.68 0.09
 7 15 1 0.69 0.09
 -7 15 -1 0.76 0.13
 8 -15 1 0.52 0.12
 -8 -15 -1 0.42 0.1
 8 -15 1 0.48 0.09
 -8 -15 -1 0.32 0.08
 -8 -15 -1 0.53 0.12
 8 -15 1 0.55 0.1
 -8 -15 -1 0.55 0.11
 -8 -15 -1 0.48 0.11
 8 -15 1 0.35 0.1
 8 -15 1 0.35 0.09
 8 15 1 0.4 0.08
 8 15 1 0.6 0.13
 -8 15 -1 0.58 0.13
 -8 15 -1 0.39 0.12
 8 15 1 0.42 0.06
 -8 15 -1 0.36 0.1
 8 15 1 0.4 0.07
 -8 15 -1 0.5 0.1
 8 15 1 0.41 0.1
 -9 -15 -1 0.18 0.13
 9 -15 1 -0.03 0.12
 9 -15 1 0.15 0.11
 9 -15 1 0.07 0.1
 -9 -15 -1 0.09 0.08
 9 -15 1 0.23 0.09
 -9 -15 -1 0.13 0.1
 -9 -15 -1 0.19 0.08
 -9 -15 -1 0.05 0.07
 9 -15 1 0.09 0.09
 9 15 1 0.16 0.06
 9 15 1 0.09 0.1
 -9 15 -1 0.09 0.08
 9 15 1 0.11 0.05
 9 15 1 0.12 0.11
 -9 15 -1 0.1 0.13
 -9 15 -1 0.24 0.11
 -9 15 -1 0.14 0.09
 10 -15 1 0.16 0.09
 -10 -15 -1 0.25 0.09
 -10 -15 -1 0.17 0.14
 -10 -15 -1 0.02 0.08
 10 -15 1 0.25 0.12
 -10 -15 -1 0.27 0.11
 10 -15 1 0.29 0.13
 -10 -15 -1 0.25 0.09
 10 -15 1 0.25 0.11
 -10 15 -1 0.26 0.15
 -10 15 -1 0.22 0.09
 -10 15 -1 0.15 0.11
 10 15 1 0.08 0.11
 10 15 1 0.28 0.06
 10 15 1 0.19 0.05
 -10 15 -1 0.19 0.11
 10 15 1 0.42 0.13
 -11 -15 -1 0.63 0.13
 11 -15 1 0.94 0.17
 -11 -15 -1 0.52 0.11
 11 -15 1 0.83 0.16
 11 -15 1 0.94 0.16
 -11 -15 -1 0.58 0.14
 11 -15 1 1.04 0.19
 -11 -15 -1 0.71 0.17
 -11 -15 -1 0.76 0.16
 11 -15 1 1.18 0.23
 -11 15 -1 0.91 0.21
 11 15 1 0.8 0.16
 11 15 1 0.83 0.17
 11 15 1 0.74 0.08
 11 15 1 0.68 0.07
 12 -15 1 0.02 0.11
 12 -15 1 0.03 0.1
 -12 -15 -1 0.02 0.09
 -12 -15 -1 -0.06 0.17
 12 -15 1 0.06 0.13
 -12 15 -1 -0.04 0.14
 12 15 1 -0.05 0.11
 -12 15 -1 0.12 0.12
 12 15 1 0.09 0.16
 -13 -15 -1 0.21 0.18
 13 -15 1 0.05 0.1
 13 -15 1 0.11 0.11
 13 15 1 0.05 0.12
 -13 15 -1 0.04 0.13
 -13 15 -1 -0.09 0.15
 14 -15 1 -0.01 0.1
 14 -15 1 -0.13 0.12
 -14 -15 -1 0.16 0.19
 -14 15 -1 0.15 0.17
 -14 15 -1 0.11 0.16
 14 -16 -1 0.11 0.13
 14 -16 -1 0 0.11
 -14 -16 1 0.23 0.17
 -14 16 1 0.12 0.15
 -14 16 1 0.23 0.15
 13 -16 -1 -0.15 0.11
 -13 -16 1 0.12 0.16
 13 -16 -1 -0.17 0.1
 -13 16 1 0.07 0.15
 -13 16 1 -0.09 0.14
 12 -16 -1 0.4 0.15
 -12 -16 1 0.82 0.18
 -12 -16 1 0.43 0.07
 12 -16 -1 0.35 0.16
 12 -16 -1 0.6 0.16
 12 -16 -1 0.31 0.11
 -12 -16 1 0.42 0.1
 -12 16 1 0.35 0.16
 -12 16 1 0.4 0.15
 12 16 -1 0.48 0.14
 -12 16 1 0.54 0.15
 -11 -16 1 0.42 0.08
 -11 -16 1 0.48 0.09
 11 -16 -1 0.57 0.14
 11 -16 -1 0.57 0.11
 -11 -16 1 0.47 0.16
 11 -16 -1 0.97 0.21
 -11 -16 1 0.54 0.15
 11 -16 -1 0.73 0.14
 11 -16 -1 0.57 0.11
 11 16 -1 0.48 0.13
 -11 16 1 0.78 0.16
 -11 16 1 0.63 0.13
 11 16 -1 0.49 0.16
 -11 16 1 0.62 0.12
 10 -16 -1 1.16 0.21
 10 -16 -1 1.34 0.19
 -10 -16 1 1.19 0.15
 -10 -16 1 1.28 0.21
 -10 -16 1 1.27 0.19
 10 -16 -1 1.36 0.17
 10 -16 -1 1.45 0.16
 10 -16 -1 1.38 0.2
 -10 -16 1 1.25 0.13
 -10 16 1 1.05 0.2
 -10 16 1 1.4 0.19
 10 16 -1 1.23 0.19
 -10 16 1 1.59 0.21
 -10 16 1 1.25 0.16
 9 -16 -1 3.07 0.25
 -9 -16 1 3.18 0.25
 9 -16 -1 3.22 0.24
 -9 -16 1 2.55 0.2
 9 -16 -1 3.23 0.25
 -9 -16 1 3.02 0.23
 9 -16 -1 3.17 0.27
 9 -16 -1 3.15 0.23
 -9 -16 1 2.84 0.25
 9 16 -1 2.91 0.25
 9 16 -1 2.86 0.26
 9 16 -1 2.78 0.19
 -9 16 1 3.06 0.25
 -9 16 1 3.12 0.24
 9 16 -1 2.67 0.18
 -9 16 1 3.09 0.26
 8 -16 -1 1.22 0.17
 8 -16 -1 1.36 0.19
 -8 -16 1 1.44 0.15
 8 -16 -1 1.6 0.16
 -8 -16 1 1.44 0.15
 8 -16 -1 1.29 0.19
 -8 -16 1 1.67 0.16
 8 -16 -1 1.44 0.17
 -8 -16 1 1.13 0.17
 8 16 -1 1.49 0.17
 -8 16 1 1.42 0.18
 -8 16 1 1.54 0.18
 8 16 -1 1.53 0.12
 -8 16 1 1.5 0.18
 -8 16 1 1.48 0.15
 8 16 -1 1.52 0.18
 8 16 -1 1.64 0.17
 8 16 -1 1.39 0.11
 -7 -16 1 0.78 0.13
 -7 -16 1 0.76 0.12
 7 -16 -1 1.1 0.14
 -7 -16 1 0.76 0.14
 7 -16 -1 1.09 0.16
 7 -16 -1 0.94 0.13
 -7 -16 1 0.55 0.11
 7 -16 -1 0.81 0.13
 -7 -16 1 0.75 0.08
 -7 -16 1 0.73 0.11
 7 16 -1 0.77 0.09
 7 16 -1 0.89 0.1
 -7 16 1 0.95 0.15
 -7 16 1 0.96 0.13
 7 16 -1 0.72 0.15
 7 16 -1 0.71 0.09
 -7 16 1 1.15 0.14
 -7 16 1 1.05 0.16
 7 16 -1 0.57 0.11
 -7 16 1 0.78 0.12
 7 16 -1 0.77 0.08
 7 16 -1 0.79 0.11
 -6 -16 1 1.85 0.16
 -6 -16 1 1.89 0.15
 6 -16 -1 1.52 0.18
 -6 -16 1 2.11 0.16
 -6 -16 1 1.77 0.13
 6 -16 -1 1.7 0.18
 6 -16 -1 1.76 0.17
 6 -16 -1 1.83 0.17
 -6 -16 1 1.89 0.17
 6 16 -1 1.91 0.15
 -6 16 1 1.88 0.17
 6 16 -1 1.96 0.16
 -6 16 1 1.81 0.18
 6 16 -1 1.81 0.14
 6 16 -1 1.93 0.14
 -6 16 1 1.77 0.17
 -6 16 1 1.63 0.17
 -6 16 1 1.68 0.15
 6 16 -1 2.06 0.18
 6 16 -1 1.54 0.14
 -5 -16 1 10.25 0.63
 5 -16 -1 9.51 0.65
 -5 -16 1 10.41 0.59
 5 -16 -1 9.64 0.6
 5 -16 -1 10.18 0.65
 5 -16 -1 9.15 0.63
 -5 -16 1 10.3 0.64
 -5 -16 1 9.5 0.63
 -5 -16 1 10.38 0.59
 -5 16 1 9.71 0.61
 -5 16 1 10.49 0.65
 -5 16 1 9.75 0.63
 -5 16 1 9.18 0.6
 5 16 -1 9.66 0.64
 5 16 -1 10.53 0.59
 5 16 -1 10.4 0.63
 5 16 -1 10.6 0.64
 4 -16 -1 3.47 0.26
 -4 -16 1 3.91 0.26
 -4 -16 1 3.86 0.24
 4 -16 -1 3.38 0.26
 4 -16 -1 3.39 0.26
 4 -16 -1 3.56 0.27
 -4 -16 1 3.98 0.26
 -4 -16 1 3.99 0.26
 4 16 -1 3.69 0.24
 -4 16 1 3.65 0.26
 4 16 -1 3.95 0.24
 -4 16 1 3.33 0.27
 4 16 -1 4.03 0.27
 4 16 -1 3.88 0.26
 -4 16 1 3.28 0.25
 -3 -16 1 12.87 0.85
 -3 -16 1 12.99 0.79
 -3 -16 1 13.6 0.83
 3 -16 -1 14.39 0.87
 -3 16 1 13.25 0.8
 -3 16 1 13.47 0.86
 3 16 -1 13.63 0.79
 3 16 -1 13.6 0.84
 -3 16 1 14.12 0.84
 -3 16 1 13.36 0.86
 3 16 -1 12.73 0.85
 3 16 -1 13.82 0.85
 -2 -16 1 -0.05 0.05
 -2 -16 1 0.05 0.05
 2 -16 -1 0.2 0.07
 2 -16 -1 0.11 0.06
 2 -16 -1 0.04 0.06
 -2 -16 1 0.12 0.07
 -2 -16 1 0.06 0.06
 2 -16 -1 0.11 0.08
 -2 -16 1 0.06 0.05
 2 -16 -1 0.1 0.08
 2 16 -1 0.09 0.07
 -2 16 1 0.1 0.06
 2 16 -1 0.05 0.06
 -2 16 1 0.04 0.07
 2 16 -1 0.05 0.07
 -2 16 1 0.18 0.07
 2 16 -1 0.1 0.06
 -2 16 1 0.1 0.07
 -2 16 1 0.03 0.07
 2 16 -1 0.04 0.06
 1 -16 -1 72.21 4.34
 1 -16 -1 80.49 4.71
 -1 -16 1 73.8 4.71
 -1 -16 1 71.93 4.71
 -1 -16 1 78.79 4.34
 -1 16 1 75.92 4.34
 1 16 -1 72.8 4.34
 1 16 -1 79.87 4.71
 -1 16 1 71.97 4.57
 1 16 -1 79.35 4.71
 1 16 -1 75.21 4.57
 0 -16 -1 2.7 0.21
 0 -16 1 2.37 0.21
 0 -16 -1 2.62 0.2
 0 -16 1 2.79 0.21
 0 -16 -1 2.83 0.21
 0 -16 1 2.42 0.19
 0 -16 1 2.61 0.2
 0 16 -1 2.56 0.2
 0 16 1 3.04 0.21
 0 16 1 3.02 0.2
 0 16 1 2.68 0.2
 0 16 1 3.01 0.21
 0 16 -1 2.32 0.19
 0 16 -1 2.83 0.21
 0 16 -1 2.44 0.21
 1 -16 1 21.58 1.33
 -1 -16 -1 22.91 1.37
 -1 -16 -1 20.27 1.32
 -1 -16 -1 22.39 1.37
 1 -16 1 22.22 1.37
 -1 -16 -1 21.26 1.26
 1 -16 1 21.15 1.26
 1 -16 1 20.91 1.37
 -1 16 -1 21.66 1.33
 -1 16 -1 22.71 1.26
 1 16 1 22.74 1.33
 1 16 1 20.33 1.37
 -1 16 -1 21.64 1.37
 1 16 1 22.73 1.26
 1 16 1 21.41 1.37
 2 -16 1 -0.04 0.06
 2 -16 1 0.07 0.07
 -2 -16 -1 0.07 0.07
 2 -16 1 0.04 0.05
 2 -16 1 0.13 0.08
 -2 -16 -1 -0.04 0.05
 -2 -16 -1 0 0.07
 -2 -16 -1 0.06 0.05
 2 -16 1 0.03 0.08
 -2 -16 -1 0.08 0.06
 2 16 1 0.15 0.07
 2 16 1 0.18 0.07
 -2 16 -1 0.09 0.07
 -2 16 -1 0.08 0.07
 2 16 1 0.1 0.06
 -2 16 -1 0.09 0.07
 2 16 1 0.06 0.07
 2 16 1 0.09 0.06
 -2 16 -1 0.07 0.06
 -3 -16 -1 0.22 0.06
 3 -16 1 0.19 0.06
 3 -16 1 0.13 0.06
 -3 -16 -1 0.33 0.09
 -3 -16 -1 0.18 0.07
 3 -16 1 0.17 0.08
 -3 -16 -1 0.4 0.08
 3 -16 1 0.23 0.08
 3 -16 1 0.26 0.08
 -3 -16 -1 0.43 0.08
 -3 16 -1 0.26 0.07
 -3 16 -1 0.08 0.06
 -3 16 -1 0.13 0.08
 -3 16 -1 0.16 0.06
 3 16 1 0.25 0.06
 3 16 1 0.32 0.07
 3 16 1 0.22 0.06
 3 16 1 0.31 0.07
 3 16 1 0.15 0.08
 4 -16 1 0.07 0.08
 4 -16 1 0.04 0.08
 4 -16 1 0.19 0.08
 4 -16 1 0.07 0.06
 -4 -16 -1 0.11 0.05
 -4 -16 -1 0.17 0.06
 -4 -16 -1 0.1 0.08
 -4 -16 -1 0.15 0.07
 -4 -16 -1 -0.04 0.06
 4 16 1 0.07 0.08
 -4 16 -1 0.1 0.05
 4 16 1 0.07 0.06
 -4 16 -1 0.07 0.09
 4 16 1 0.09 0.05
 -4 16 -1 0.04 0.07
 -4 16 -1 0.03 0.08
 4 16 1 0.02 0.06
 -4 16 -1 0.1 0.07
 4 16 1 0.14 0.07
 -5 -16 -1 2.32 0.19
 -5 -16 -1 2.16 0.16
 5 -16 1 2.16 0.18
 5 -16 1 2.14 0.2
 5 -16 1 2.07 0.19
 5 -16 1 2 0.19
 -5 -16 -1 2.42 0.18
 -5 -16 -1 2.46 0.18
 -5 -16 -1 2.61 0.19
 -5 -16 -1 2.2 0.19
 5 -16 1 1.85 0.19
 -5 16 -1 2.66 0.19
 5 16 1 2.09 0.18
 5 16 1 2.4 0.16
 5 16 1 2.09 0.18
 -5 16 -1 2.17 0.18
 -5 16 -1 2.09 0.18
 -5 16 -1 2.52 0.18
 5 16 1 2.32 0.17
 -5 16 -1 2.49 0.21
 6 -16 1 0.53 0.12
 -6 -16 -1 0.64 0.13
 6 -16 1 0.75 0.15
 -6 -16 -1 0.61 0.12
 -6 -16 -1 0.57 0.1
 -6 -16 -1 0.71 0.11
 6 -16 1 0.64 0.13
 -6 -16 -1 0.54 0.08
 -6 -16 -1 0.45 0.09
 6 -16 1 0.5 0.1
 6 -16 1 0.52 0.12
 6 16 1 0.46 0.08
 6 16 1 0.56 0.09
 -6 16 -1 0.53 0.11
 6 16 1 0.57 0.1
 6 16 1 0.55 0.12
 6 16 1 0.44 0.09
 -6 16 -1 0.34 0.08
 -6 16 -1 0.54 0.12
 6 16 1 0.47 0.09
 -6 16 -1 0.6 0.14
 7 -16 1 0.76 0.13
 7 -16 1 0.39 0.12
 -7 -16 -1 0.76 0.11
 -7 -16 -1 0.61 0.12
 -7 -16 -1 0.62 0.13
 7 -16 1 0.46 0.1
 -7 -16 -1 0.86 0.13
 7 -16 1 0.67 0.13
 7 -16 1 0.47 0.1
 -7 -16 -1 0.74 0.13
 7 16 1 0.75 0.1
 -7 16 -1 0.59 0.13
 -7 16 -1 0.46 0.12
 7 16 1 0.76 0.13
 7 16 1 0.67 0.11
 7 16 1 0.7 0.14
 -7 16 -1 0.55 0.11
 7 16 1 0.63 0.09
 7 16 1 0.61 0.09
 7 16 1 0.63 0.12
 -8 -16 -1 0.13 0.08
 8 -16 1 0.24 0.09
 -8 -16 -1 0.16 0.1
 8 -16 1 0.14 0.11
 -8 -16 -1 0.08 0.08
 -8 -16 -1 0.2 0.08
 8 -16 1 0.13 0.11
 8 -16 1 0.12 0.09
 -8 -16 -1 0.16 0.11
 8 -16 1 0.1 0.08
 -8 16 -1 0.21 0.09
 8 16 1 0.1 0.1
 8 16 1 0.07 0.04
 8 16 1 0.13 0.05
 8 16 1 0.11 0.09
 -8 16 -1 0.1 0.12
 -8 16 -1 0.17 0.1
 8 16 1 0.13 0.05
 -8 16 -1 0.14 0.1
 9 -16 1 1.74 0.2
 9 -16 1 1.46 0.19
 -9 -16 -1 1.78 0.19
 -9 -16 -1 1.53 0.2
 -9 -16 -1 1.53 0.15
 9 -16 1 1.63 0.22
 -9 -16 -1 1.34 0.18
 -9 -16 -1 1.46 0.18
 9 -16 1 1.67 0.18
 9 -16 1 1.66 0.22
 9 16 1 1.6 0.19
 9 16 1 1.68 0.13
 -9 16 -1 1.63 0.18
 -9 16 -1 2.04 0.22
 -9 16 -1 1.71 0.17
 -9 16 -1 1.73 0.22
 9 16 1 1.65 0.14
 9 16 1 1.46 0.19
 -10 -16 -1 0.49 0.1
 10 -16 1 0.82 0.16
 10 -16 1 0.5 0.14
 10 -16 1 0.7 0.14
 -10 -16 -1 0.57 0.1
 -10 -16 -1 0.78 0.18
 -10 -16 -1 0.66 0.14
 10 -16 1 0.92 0.18
 -10 -16 -1 0.43 0.1
 10 16 1 0.68 0.1
 10 16 1 0.46 0.11
 10 16 1 0.64 0.09
 10 16 1 0.68 0.14
 -10 16 -1 0.69 0.14
 -10 16 -1 0.64 0.15
 -10 16 -1 0.92 0.15
 -11 -16 -1 0.16 0.1
 11 -16 1 0.18 0.14
 -11 -16 -1 0.23 0.09
 11 -16 1 0.36 0.16
 -11 -16 -1 0.12 0.14
 11 -16 1 0.17 0.13
 -11 -16 -1 0.11 0.13
 11 -16 1 0.31 0.1
 -11 16 -1 0.15 0.14
 11 16 1 0.16 0.05
 11 16 1 0.11 0.11
 -11 16 -1 0.16 0.1
 11 16 1 0.21 0.14
 -11 16 -1 0.28 0.13
 11 16 1 0.18 0.05
 12 -16 1 -0.15 0.1
 12 -16 1 0.06 0.11
 12 -16 1 0.08 0.14
 -12 -16 -1 0.16 0.17
 12 16 1 0.02 0.12
 -12 16 -1 0.19 0.15
 12 16 1 -0.01 0.17
 -12 16 -1 0.11 0.13
 -13 -16 -1 -0.02 0.18
 13 -16 1 0.07 0.11
 13 -16 1 0.01 0.1
 -13 16 -1 0.14 0.16
 13 16 1 0.06 0.13
 -13 16 -1 -0.05 0.14
 14 -16 1 -0.1 0.12
 -14 -16 -1 0.3 0.2
 14 -16 1 0.11 0.11
 -14 16 -1 0.2 0.19
 14 -17 -1 0.06 0.11
 -14 -17 1 0.13 0.17
 14 -17 -1 -0.08 0.13
 -14 17 1 0.11 0.14
 -14 17 1 -0.11 0.16
 13 -17 -1 -0.06 0.11
 13 -17 -1 -0.15 0.1
 -13 -17 1 0.21 0.16
 -13 17 1 0.17 0.14
 -13 17 1 -0.13 0.14
 12 -17 -1 1.36 0.26
 -12 -17 1 1.21 0.17
 12 -17 -1 1.11 0.17
 -12 -17 1 1.21 0.23
 -12 -17 1 1.03 0.12
 12 -17 -1 1.14 0.19
 -12 17 1 0.85 0.17
 -12 17 1 0.73 0.19
 -12 17 1 1.22 0.2
 -12 17 1 1.3 0.21
 11 -17 -1 0.19 0.14
 -11 -17 1 0.13 0.13
 11 -17 -1 0.12 0.1
 -11 -17 1 0.14 0.14
 11 -17 -1 0.25 0.1
 -11 -17 1 0.16 0.07
 11 -17 -1 0.08 0.14
 -11 -17 1 0.16 0.09
 11 -17 -1 0.09 0.14
 -11 17 1 0.01 0.11
 -11 17 1 0.06 0.12
 -11 17 1 0.22 0.15
 -11 17 1 0.15 0.11
 -10 -17 1 0.01 0.07
 10 -17 -1 0.06 0.12
 10 -17 -1 0.24 0.14
 -10 -17 1 -0.09 0.07
 10 -17 -1 0.14 0.12
 -10 -17 1 0.13 0.14
 -10 -17 1 0.13 0.08
 -10 -17 1 -0.07 0.12
 10 -17 -1 0.13 0.1
 -10 17 1 0.07 0.1
 -10 17 1 -0.05 0.11
 10 17 -1 0.08 0.14
 10 17 -1 0 0.04
 -10 17 1 0.13 0.14
 10 17 -1 0.06 0.04
 10 17 -1 0.12 0.12
 -10 17 1 -0.15 0.1
 -9 -17 1 0.07 0.07
 9 -17 -1 0.2 0.1
 -9 -17 1 0.1 0.08
 9 -17 -1 0.07 0.12
 -9 -17 1 0.05 0.08
 9 -17 -1 0.15 0.12
 -9 -17 1 0.09 0.11
 9 -17 -1 0.17 0.11
 9 -17 -1 0.06 0.09
 -9 -17 1 0.25 0.11
 -9 17 1 0.07 0.09
 -9 17 1 -0.02 0.1
 9 17 -1 0.12 0.11
 -9 17 1 0.16 0.12
 9 17 -1 0.2 0.12
 9 17 -1 0.15 0.05
 9 17 -1 0.14 0.06
 -9 17 1 -0.06 0.09
 8 -17 -1 0.42 0.1
 8 -17 -1 0.37 0.12
 -8 -17 1 0.31 0.11
 8 -17 -1 0.37 0.09
 8 -17 -1 0.42 0.13
 -8 -17 1 0.43 0.08
 8 -17 -1 0.49 0.11
 -8 -17 1 0.62 0.13
 -8 -17 1 0.33 0.08
 8 17 -1 0.35 0.08
 -8 17 1 0.38 0.1
 8 17 -1 0.51 0.11
 -8 17 1 0.46 0.1
 8 17 -1 0.5 0.11
 -8 17 1 0.4 0.11
 -8 17 1 0.46 0.12
 8 17 -1 0.4 0.1
 8 17 -1 0.46 0.09
 8 17 -1 0.42 0.05
 -7 -17 1 0.25 0.08
 -7 -17 1 0.31 0.07
 -7 -17 1 0.19 0.07
 7 -17 -1 0.27 0.09
 -7 -17 1 0.19 0.08
 -7 -17 1 0.15 0.07
 -7 -17 1 0.2 0.1
 7 -17 -1 0.16 0.08
 7 -17 -1 0.23 0.08
 -7 17 1 0.16 0.07
 7 17 -1 0.08 0.05
 7 17 -1 0.09 0.05
 -7 17 1 0.27 0.08
 7 17 -1 0.03 0.09
 7 17 -1 0.22 0.09
 7 17 -1 0.21 0.05
 7 17 -1 0.2 0.06
 -7 17 1 0.1 0.09
 -7 17 1 0.03 0.09
 -6 -17 1 0.54 0.12
 6 -17 -1 0.42 0.1
 -6 -17 1 0.56 0.1
 6 -17 -1 0.52 0.12
 -6 -17 1 0.62 0.12
 6 -17 -1 0.4 0.09
 6 -17 -1 0.29 0.09
 -6 -17 1 0.6 0.11
 -6 -17 1 0.39 0.08
 6 -17 -1 0.52 0.09
 -6 17 1 0.25 0.09
 -6 17 1 0.57 0.12
 -6 17 1 0.4 0.09
 -6 17 1 0.29 0.08
 -6 17 1 0.43 0.11
 6 17 -1 0.37 0.07
 6 17 -1 0.47 0.1
 6 17 -1 0.57 0.1
 6 17 -1 0.57 0.13
 6 17 -1 0.39 0.08
 -5 -17 1 2.66 0.19
 -5 -17 1 2.87 0.21
 5 -17 -1 3.04 0.22
 5 -17 -1 2.76 0.23
 5 -17 -1 2.66 0.22
 -5 -17 1 2.76 0.21
 -5 -17 1 3.05 0.22
 -5 -17 1 2.85 0.22
 -5 -17 1 2.9 0.2
 5 -17 -1 2.65 0.23
 5 -17 -1 2.6 0.21
 -5 17 1 2.51 0.21
 5 17 -1 2.78 0.23
 5 17 -1 2.87 0.19
 5 17 -1 2.75 0.2
 -5 17 1 3.17 0.22
 -5 17 1 2.93 0.21
 -5 17 1 2.76 0.22
 5 17 -1 2.85 0.21
 -5 17 1 2.82 0.23
 5 17 -1 2.62 0.2
 -4 -17 1 2.4 0.18
 4 -17 -1 2.29 0.21
 4 -17 -1 2.55 0.22
 4 -17 -1 2.76 0.21
 -4 -17 1 2.67 0.2
 -4 -17 1 2.42 0.19
 -4 -17 1 2.85 0.21
 -4 -17 1 2.47 0.2
 4 -17 -1 2.73 0.2
 4 -17 -1 2.83 0.19
 4 17 -1 2.37 0.19
 4 17 -1 2.67 0.2
 -4 17 1 2.75 0.21
 -4 17 1 3 0.22
 4 17 -1 2.92 0.2
 -4 17 1 2.69 0.21
 -4 17 1 2.62 0.2
 -4 17 1 2.64 0.2
 4 17 -1 2.54 0.18
 4 17 -1 2.67 0.2
 3 -17 -1 0.21 0.06
 -3 -17 1 0.1 0.06
 3 -17 -1 0.21 0.08
 -3 -17 1 0.02 0.05
 -3 -17 1 0.25 0.07
 -3 -17 1 0.13 0.05
 3 -17 -1 0.3 0.08
 -3 -17 1 0.2 0.08
 -3 -17 1 0.24 0.07
 3 -17 -1 0.26 0.08
 -3 17 1 0.26 0.08
 -3 17 1 0.2 0.08
 3 17 -1 0.12 0.06
 3 17 -1 0.15 0.07
 -3 17 1 0.15 0.06
 -3 17 1 0.24 0.08
 3 17 -1 0.12 0.07
 -3 17 1 0.28 0.08
 3 17 -1 0.13 0.06
 3 17 -1 0.2 0.07
 2 -17 -1 2.3 0.19
 -2 -17 1 1.79 0.17
 -2 -17 1 1.95 0.17
 2 -17 -1 2.26 0.17
 2 -17 -1 2.34 0.18
 2 -17 -1 2.4 0.17
 -2 -17 1 1.99 0.15
 2 -17 -1 2.26 0.17
 -2 -17 1 2.08 0.18
 -2 17 1 2.5 0.19
 2 17 -1 1.96 0.17
 2 17 -1 1.82 0.19
 -2 17 1 2.1 0.18
 2 17 -1 2.18 0.16
 2 17 -1 1.81 0.17
 -2 17 1 2.25 0.18
 -2 17 1 2.09 0.17
 2 17 -1 1.77 0.17
 -2 17 1 2.26 0.18
 -1 -17 1 2.53 0.21
 1 -17 -1 2.51 0.2
 -1 -17 1 2.56 0.2
 1 -17 -1 2.35 0.19
 -1 -17 1 2.67 0.18
 -1 -17 1 2.54 0.2
 1 -17 -1 2.58 0.2
 -1 -17 1 2.48 0.2
 1 -17 -1 2.65 0.22
 1 17 -1 2.95 0.2
 1 17 -1 2.58 0.2
 -1 17 1 2.86 0.19
 -1 17 1 2.91 0.21
 -1 17 1 2.63 0.2
 1 17 -1 2.54 0.19
 -1 17 1 2.5 0.21
 1 17 -1 2.46 0.2
 0 -17 -1 1.58 0.14
 0 -17 1 1.24 0.15
 0 -17 1 1.29 0.14
 0 -17 1 1.41 0.14
 0 -17 -1 1.84 0.15
 0 -17 1 1.49 0.16
 0 17 1 1.81 0.15
 0 17 1 1.71 0.15
 0 17 1 1.72 0.15
 0 17 -1 1.44 0.15
 0 17 -1 1.35 0.15
 0 17 1 1.95 0.16
 0 17 -1 1.42 0.16
 0 17 -1 1.48 0.15
 0 17 -1 1.53 0.14
 0 17 1 1.77 0.15
 1 -17 1 1.95 0.16
 -1 -17 -1 2.02 0.17
 1 -17 1 2.23 0.19
 1 -17 1 2.41 0.18
 -1 -17 -1 1.87 0.16
 1 -17 1 2.2 0.17
 1 -17 1 1.83 0.17
 -1 -17 -1 1.77 0.17
 -1 -17 -1 2.09 0.19
 -1 17 -1 2.31 0.17
 1 17 1 1.86 0.16
 1 17 1 2.01 0.17
 1 17 1 1.79 0.17
 -1 17 -1 2.08 0.18
 1 17 1 1.98 0.18
 -1 17 -1 2.25 0.17
 -1 17 -1 2.35 0.18
 -2 -17 -1 0 0.06
 -2 -17 -1 0.06 0.08
 2 -17 1 -0.12 0.07
 2 -17 1 -0.03 0.07
 2 -17 1 0.03 0.08
 -2 -17 -1 0.06 0.05
 -2 -17 -1 0.05 0.07
 2 -17 1 -0.04 0.06
 -2 -17 -1 -0.04 0.05
 2 -17 1 -0.11 0.05
 -2 17 -1 -0.04 0.07
 -2 17 -1 0.02 0.06
 2 17 1 -0.07 0.08
 2 17 1 0.12 0.07
 -2 17 -1 0.05 0.07
 2 17 1 0.08 0.07
 2 17 1 0.04 0.06
 2 17 1 -0.03 0.06
 -2 17 -1 0.1 0.07
 3 -17 1 0.06 0.08
 3 -17 1 -0.08 0.08
 3 -17 1 0.15 0.08
 -3 -17 -1 0.05 0.07
 -3 -17 -1 -0.11 0.05
 -3 -17 -1 0.04 0.05
 -3 -17 -1 0.12 0.06
 3 -17 1 -0.02 0.06
 3 -17 1 0.02 0.07
 -3 -17 -1 0.13 0.08
 -3 -17 -1 0.08 0.07
 3 17 1 0.07 0.07
 -3 17 -1 0.05 0.07
 -3 17 -1 0.05 0.07
 3 17 1 0.1 0.06
 -3 17 -1 0 0.05
 3 17 1 0.05 0.08
 3 17 1 -0.06 0.06
 -3 17 -1 -0.13 0.07
 4 -17 1 0.39 0.09
 -4 -17 -1 0.4 0.09
 4 -17 1 0.33 0.09
 4 -17 1 0.39 0.09
 4 -17 1 0.31 0.07
 -4 -17 -1 0.33 0.06
 -4 -17 -1 0.31 0.08
 -4 -17 -1 0.58 0.1
 4 17 1 0.28 0.07
 -4 17 -1 0.35 0.08
 -4 17 -1 0.33 0.08
 4 17 1 0.27 0.07
 -4 17 -1 0.23 0.09
 4 17 1 0.26 0.07
 4 17 1 0.25 0.09
 -4 17 -1 0.4 0.09
 4 17 1 0.48 0.09
 -5 -17 -1 2.7 0.19
 5 -17 1 2.71 0.23
 5 -17 1 2.82 0.22
 -5 -17 -1 2.91 0.23
 -5 -17 -1 3.21 0.23
 5 -17 1 2.63 0.21
 5 -17 1 3.19 0.23
 -5 -17 -1 2.71 0.21
 5 -17 1 2.42 0.23
 -5 -17 -1 2.48 0.21
 -5 -17 -1 2.74 0.21
 5 17 1 2.72 0.2
 -5 17 -1 3.01 0.22
 -5 17 -1 3.22 0.24
 5 17 1 3.09 0.21
 5 17 1 2.87 0.19
 -5 17 -1 2.89 0.22
 5 17 1 3.03 0.22
 -5 17 -1 2.97 0.22
 -6 -17 -1 0.2 0.07
 -6 -17 -1 0.22 0.08
 6 -17 1 0.34 0.09
 6 -17 1 0.19 0.09
 -6 -17 -1 0.26 0.11
 -6 -17 -1 0.2 0.08
 -6 -17 -1 0.17 0.08
 6 -17 1 0.23 0.08
 6 -17 1 0.16 0.08
 6 -17 1 0.07 0.11
 -6 -17 -1 0.25 0.05
 -6 17 -1 0.14 0.08
 6 17 1 0.21 0.06
 6 17 1 0.12 0.06
 6 17 1 0.26 0.08
 6 17 1 0.1 0.08
 -6 17 -1 0.07 0.09
 6 17 1 0.09 0.07
 -6 17 -1 0.14 0.08
 6 17 1 0.13 0.06
 -6 17 -1 0.12 0.1
 7 -17 1 0.02 0.07
 -7 -17 -1 0.12 0.09
 -7 -17 -1 0.01 0.08
 -7 -17 -1 0.01 0.09
 -7 -17 -1 0.03 0.08
 7 -17 1 0.06 0.09
 7 -17 1 -0.1 0.09
 7 -17 1 0.06 0.09
 -7 -17 -1 0.03 0.07
 7 17 1 0.04 0.05
 -7 17 -1 0.01 0.08
 7 17 1 -0.01 0.06
 7 17 1 0.1 0.07
 7 17 1 0.04 0.06
 7 17 1 -0.04 0.09
 7 17 1 0.08 0.09
 -7 17 -1 0.12 0.09
 8 -17 1 0.52 0.1
 -8 -17 -1 0.7 0.14
 -8 -17 -1 0.74 0.16
 -8 -17 -1 0.52 0.1
 8 -17 1 0.78 0.18
 8 -17 1 0.65 0.14
 -8 -17 -1 0.51 0.12
 8 -17 1 0.68 0.15
 8 -17 1 0.52 0.13
 -8 -17 -1 0.43 0.09
 8 17 1 0.63 0.14
 -8 17 -1 0.63 0.12
 8 17 1 0.55 0.09
 -8 17 -1 0.87 0.13
 8 17 1 0.52 0.08
 8 17 1 0.48 0.09
 8 17 1 0.34 0.1
 -9 -17 -1 1.13 0.18
 -9 -17 -1 1.01 0.17
 9 -17 1 1.17 0.21
 -9 -17 -1 1.18 0.17
 9 -17 1 1.34 0.17
 9 -17 1 1.63 0.17
 -9 -17 -1 1.3 0.15
 9 -17 1 1.13 0.18
 -9 -17 -1 1.15 0.17
 9 -17 1 1.1 0.2
 -9 17 -1 1.23 0.2
 9 17 1 1.01 0.16
 -9 17 -1 1.49 0.18
 -9 17 -1 1.31 0.18
 9 17 1 1.14 0.11
 9 17 1 1.03 0.12
 9 17 1 1.09 0.16
 10 -17 1 0.32 0.15
 10 -17 1 0.2 0.1
 10 -17 1 0.26 0.12
 -10 -17 -1 0.2 0.13
 -10 -17 -1 0.25 0.1
 -10 -17 -1 0.16 0.09
 10 -17 1 0.25 0.14
 10 -17 1 0.29 0.11
 -10 17 -1 0.22 0.13
 10 17 1 0.29 0.11
 -10 17 -1 0.23 0.1
 10 17 1 0.44 0.09
 10 17 1 0.28 0.07
 10 17 1 0.34 0.14
 -10 17 -1 0.14 0.12
 -11 -17 -1 0.24 0.1
 11 -17 1 0.36 0.11
 -11 -17 -1 0.28 0.14
 -11 -17 -1 0.23 0.11
 11 -17 1 0.36 0.16
 11 -17 1 0.33 0.11
 -11 -17 -1 0.2 0.14
 11 -17 1 0.23 0.14
 11 -17 1 0.45 0.17
 11 17 1 0.35 0.06
 -11 17 -1 0.12 0.14
 11 17 1 0.42 0.15
 11 17 1 0.29 0.06
 11 17 1 0.32 0.12
 -11 17 -1 0.27 0.13
 -11 17 -1 0.21 0.11
 12 -17 1 -0.04 0.15
 12 -17 1 -0.11 0.11
 12 -17 1 -0.12 0.1
 -12 -17 -1 0.16 0.18
 12 17 1 0 0.12
 -12 17 -1 0.09 0.14
 12 17 1 0.11 0.17
 -12 17 -1 -0.3 0.12
 -13 -17 -1 0.16 0.19
 13 -17 1 0.04 0.11
 13 -17 1 0.08 0.12
 13 17 1 0.05 0.14
 -13 17 -1 0 0.14
 -13 17 -1 0.17 0.16
 14 -17 1 0.07 0.1
 -14 -17 -1 0.09 0.2
 14 -17 1 -0.18 0.12
 14 -18 -1 0.22 0.12
 14 -18 -1 0.36 0.14
 -14 -18 1 0.44 0.19
 -14 18 1 0.16 0.18
 -14 18 1 0.37 0.17
 -13 -18 1 0.28 0.16
 13 -18 -1 -0.16 0.12
 -13 18 1 0.15 0.15
 -12 -18 1 0.06 0.16
 12 -18 -1 -0.12 0.1
 12 -18 -1 -0.07 0.11
 -12 18 1 -0.08 0.13
 -12 18 1 -0.2 0.14
 -11 -18 1 -0.06 0.08
 11 -18 -1 -0.04 0.15
 -11 -18 1 0.02 0.09
 11 -18 -1 -0.02 0.11
 11 -18 -1 -0.05 0.15
 11 -18 -1 -0.12 0.14
 11 -18 -1 0.08 0.1
 -11 18 1 -0.11 0.12
 -11 18 1 -0.08 0.11
 11 18 -1 0.12 0.13
 -11 18 1 0.06 0.16
 -11 18 1 0 0.13
 10 -18 -1 0.05 0.13
 10 -18 -1 0.22 0.14
 10 -18 -1 0.23 0.14
 -10 -18 1 0.23 0.13
 -10 -18 1 0.04 0.09
 -10 -18 1 0.19 0.09
 10 -18 -1 0.21 0.1
 -10 -18 1 0.11 0.08
 -10 -18 1 0.11 0.12
 -10 18 1 0.32 0.11
 -10 18 1 0.02 0.12
 10 18 -1 0.08 0.05
 10 18 -1 0.13 0.14
 10 18 -1 0.07 0.12
 -10 18 1 0.3 0.14
 10 18 -1 0.11 0.05
 9 -18 -1 0.03 0.12
 9 -18 -1 -0.22 0.08
 9 -18 -1 0.1 0.12
 9 -18 -1 0.04 0.1
 -9 -18 1 0.01 0.11
 -9 -18 1 -0.01 0.08
 -9 -18 1 -0.02 0.08
 9 -18 -1 -0.14 0.13
 -9 -18 1 0.02 0.11
 -9 -18 1 0.12 0.08
 -9 18 1 0.05 0.1
 9 18 -1 0.02 0.06
 9 18 -1 -0.04 0.12
 -9 18 1 0.16 0.14
 -9 18 1 -0.18 0.11
 9 18 -1 0.06 0.11
 -9 18 1 0.01 0.1
 9 18 -1 -0.01 0.05
 -8 -18 1 2.44 0.21
 -8 -18 1 2.44 0.19
 8 -18 -1 2.43 0.21
 8 -18 -1 2.41 0.2
 -8 -18 1 2.58 0.21
 -8 -18 1 2.31 0.2
 -8 -18 1 2.41 0.23
 8 -18 -1 2.05 0.24
 8 -18 -1 2.29 0.23
 -8 18 1 2.23 0.22
 -8 18 1 1.95 0.22
 8 18 -1 2.63 0.23
 8 18 -1 2.34 0.17
 8 18 -1 2.31 0.16
 8 18 -1 2.07 0.21
 -8 18 1 2.09 0.21
 8 18 -1 2.51 0.17
 -7 -18 1 0.73 0.12
 -7 -18 1 0.62 0.12
 7 -18 -1 0.8 0.17
 7 -18 -1 0.6 0.14
 -7 -18 1 0.61 0.13
 7 -18 -1 0.56 0.14
 -7 -18 1 0.69 0.13
 7 -18 -1 0.7 0.15
 -7 -18 1 0.66 0.12
 -7 18 1 0.72 0.13
 7 18 -1 0.78 0.1
 7 18 -1 0.78 0.11
 -7 18 1 0.43 0.12
 7 18 -1 0.66 0.09
 -7 18 1 0.9 0.14
 7 18 -1 0.39 0.1
 -7 18 1 0.36 0.11
 7 18 -1 0.38 0.11
 7 18 -1 0.51 0.11
 -6 -18 1 0.02 0.07
 6 -18 -1 0.03 0.08
 -6 -18 1 0.15 0.08
 6 -18 -1 0.11 0.1
 -6 -18 1 0.1 0.09
 6 -18 -1 0.03 0.09
 -6 -18 1 0.12 0.08
 -6 -18 1 0.1 0.06
 6 -18 -1 0.05 0.08
 -6 -18 1 0.01 0.05
 6 -18 -1 -0.06 0.09
 6 18 -1 0.16 0.06
 6 18 -1 -0.02 0.08
 -6 18 1 0.03 0.08
 -6 18 1 0.01 0.08
 6 18 -1 0.22 0.09
 6 18 -1 -0.01 0.05
 6 18 -1 0.06 0.06
 -6 18 1 -0.04 0.08
 -6 18 1 0.05 0.1
 6 18 -1 0.16 0.07
 -5 -18 1 0.72 0.12
 -5 -18 1 0.86 0.14
 -5 -18 1 0.78 0.13
 -5 -18 1 0.78 0.12
 5 -18 -1 0.88 0.14
 -5 -18 1 0.73 0.1
 5 -18 -1 1.11 0.13
 5 -18 -1 1.07 0.14
 -5 -18 1 0.95 0.11
 5 -18 -1 0.87 0.14
 5 -18 -1 0.7 0.14
 -5 18 1 1.22 0.14
 -5 18 1 0.92 0.1
 5 18 -1 1.04 0.12
 -5 18 1 1 0.13
 5 18 -1 0.82 0.11
 5 18 -1 1.13 0.13
 5 18 -1 1 0.12
 5 18 -1 0.79 0.1
 -5 18 1 0.75 0.13
 -5 18 1 0.68 0.15
 4 -18 -1 11.34 0.73
 -4 -18 1 12.01 0.73
 4 -18 -1 11.72 0.71
 4 -18 -1 10.98 0.76
 4 -18 -1 11.48 0.76
 -4 -18 1 11.79 0.69
 -4 18 1 11.63 0.76
 4 18 -1 12.19 0.75
 -4 18 1 11.68 0.76
 -4 18 1 11.73 0.71
 4 18 -1 12.33 0.74
 -4 18 1 11.41 0.7
 4 18 -1 11.56 0.69
 -4 18 1 11.89 0.74
 4 18 -1 12.43 0.69
 3 -18 -1 1.13 0.12
 -3 -18 1 1.06 0.13
 -3 -18 1 0.74 0.11
 3 -18 -1 0.78 0.13
 -3 -18 1 0.95 0.11
 -3 -18 1 1.08 0.13
 3 -18 -1 1.02 0.13
 -3 -18 1 0.75 0.1
 3 -18 -1 0.82 0.12
 3 -18 -1 1.16 0.11
 -3 -18 1 1.09 0.12
 3 18 -1 0.9 0.13
 -3 18 1 1.25 0.14
 3 18 -1 0.94 0.12
 -3 18 1 1.02 0.12
 -3 18 1 0.98 0.13
 -3 18 1 0.83 0.14
 3 18 -1 1.07 0.15
 3 18 -1 0.96 0.11
 -3 18 1 1.23 0.13
 -2 -18 1 0.21 0.06
 -2 -18 1 0.25 0.08
 2 -18 -1 0.41 0.09
 2 -18 -1 0.49 0.09
 -2 -18 1 0.17 0.07
 2 -18 -1 0.41 0.1
 -2 -18 1 0.19 0.06
 -2 -18 1 0.39 0.08
 2 18 -1 0.24 0.07
 2 18 -1 0.31 0.09
 -2 18 1 0.25 0.08
 -2 18 1 0.38 0.08
 2 18 -1 0.26 0.07
 -2 18 1 0.29 0.08
 2 18 -1 0.22 0.07
 -2 18 1 0.48 0.1
 2 18 -1 0.29 0.09
 1 -18 -1 2.09 0.16
 -1 -18 1 1.5 0.16
 1 -18 -1 1.77 0.15
 -1 -18 1 1.71 0.16
 -1 -18 1 1.45 0.14
 -1 -18 1 1.69 0.16
 1 -18 -1 1.47 0.15
 1 -18 -1 1.67 0.17
 -1 -18 1 1.44 0.17
 -1 18 1 1.75 0.16
 1 18 -1 1.59 0.16
 -1 18 1 2.13 0.17
 1 18 -1 1.59 0.15
 -1 18 1 2.1 0.16
 1 18 -1 1.83 0.16
 1 18 -1 1.7 0.15
 1 18 -1 1.65 0.16
 -1 18 1 1.95 0.17
 -1 18 1 1.77 0.15
 0 -18 1 3.97 0.3
 0 -18 -1 4.46 0.3
 0 -18 -1 4.18 0.27
 0 -18 -1 4.1 0.28
 0 -18 1 4.04 0.29
 0 -18 -1 4.14 0.28
 0 -18 1 3.95 0.27
 0 -18 1 4 0.29
 0 -18 1 3.99 0.27
 0 -18 -1 4.46 0.3
 0 18 -1 4.25 0.29
 0 18 1 3.88 0.29
 0 18 -1 4.31 0.29
 0 18 -1 3.96 0.27
 0 18 -1 3.95 0.29
 0 18 1 4.05 0.29
 0 18 1 3.94 0.27
 0 18 1 4.44 0.3
 -1 -18 -1 0.89 0.13
 1 -18 1 1.08 0.15
 1 -18 1 0.84 0.12
 -1 -18 -1 1.03 0.14
 -1 -18 -1 0.95 0.13
 1 -18 1 0.98 0.12
 -1 -18 -1 1.08 0.13
 1 -18 1 1.21 0.13
 1 -18 1 1.27 0.14
 1 18 1 1.04 0.13
 -1 18 -1 1.15 0.13
 1 18 1 1.08 0.12
 -1 18 -1 1.12 0.13
 -1 18 -1 1.24 0.13
 1 18 1 1.06 0.14
 -1 18 -1 1.46 0.14
 1 18 1 1.04 0.14
 -1 18 -1 1.21 0.13
 1 18 1 0.91 0.13
 2 -18 1 1.9 0.17
 -2 -18 -1 2.09 0.17
 -2 -18 -1 2.12 0.18
 -2 -18 -1 1.92 0.16
 -2 -18 -1 1.99 0.15
 2 -18 1 2.25 0.19
 2 -18 1 1.79 0.17
 2 -18 1 2.24 0.17
 -2 -18 -1 2.21 0.19
 2 -18 1 2.44 0.18
 -2 18 -1 1.88 0.18
 -2 18 -1 2.12 0.17
 2 18 1 1.84 0.17
 2 18 1 1.86 0.17
 2 18 1 2.14 0.16
 -2 18 -1 2.27 0.17
 2 18 1 1.89 0.18
 -2 18 -1 2.42 0.18
 2 18 1 2.13 0.17
 -2 18 -1 2.17 0.18
 -3 -18 -1 0.4 0.07
 -3 -18 -1 0.39 0.08
 3 -18 1 0.66 0.12
 3 -18 1 0.55 0.09
 3 -18 1 0.32 0.08
 3 -18 1 0.44 0.09
 -3 -18 -1 0.6 0.1
 -3 -18 -1 0.54 0.09
 3 -18 1 0.51 0.1
 -3 -18 -1 0.53 0.09
 -3 -18 -1 0.44 0.09
 -3 18 -1 0.71 0.1
 -3 18 -1 0.53 0.1
 3 18 1 0.45 0.09
 3 18 1 0.43 0.09
 -3 18 -1 0.82 0.11
 3 18 1 0.46 0.11
 3 18 1 0.43 0.09
 -3 18 -1 0.38 0.09
 3 18 1 0.58 0.12
 -4 -18 -1 6.78 0.45
 -4 -18 -1 6.42 0.41
 4 -18 1 6.35 0.43
 -4 -18 -1 7.16 0.44
 -4 -18 -1 7.46 0.44
 4 -18 1 6.2 0.44
 4 -18 1 6.58 0.43
 -4 18 -1 6.91 0.44
 -4 18 -1 6.29 0.46
 4 18 1 6.45 0.44
 4 18 1 7.16 0.41
 -4 18 -1 6.34 0.45
 -4 18 -1 7 0.42
 5 -18 1 0.29 0.08
 -5 -18 -1 0.23 0.07
 -5 -18 -1 0.35 0.07
 5 -18 1 0.5 0.11
 5 -18 1 0.35 0.08
 5 -18 1 0.37 0.1
 -5 -18 -1 0.44 0.11
 5 -18 1 0.11 0.08
 -5 -18 -1 0.13 0.08
 -5 18 -1 0.16 0.08
 -5 18 -1 0.27 0.09
 5 18 1 0.31 0.07
 5 18 1 0.28 0.07
 5 18 1 0.35 0.09
 5 18 1 0.36 0.07
 -5 18 -1 0.38 0.09
 5 18 1 0.29 0.08
 -5 18 -1 0.26 0.09
 -6 -18 -1 0.9 0.14
 6 -18 1 0.59 0.13
 6 -18 1 0.88 0.15
 6 -18 1 0.9 0.16
 -6 -18 -1 1 0.13
 6 -18 1 0.86 0.14
 -6 -18 -1 0.74 0.15
 6 -18 1 0.58 0.13
 -6 -18 -1 0.8 0.14
 -6 -18 -1 0.84 0.13
 6 18 1 0.93 0.1
 6 18 1 0.74 0.12
 6 18 1 0.91 0.12
 6 18 1 0.84 0.15
 6 18 1 0.88 0.12
 -6 18 -1 0.89 0.13
 -6 18 -1 0.8 0.12
 -6 18 -1 0.85 0.15
 6 18 1 0.89 0.12
 -7 -18 -1 0.21 0.1
 7 -18 1 0.18 0.1
 7 -18 1 0.14 0.11
 7 -18 1 0.18 0.13
 7 -18 1 0.24 0.1
 -7 -18 -1 0.14 0.09
 -7 -18 -1 0.21 0.09
 -7 -18 -1 0.18 0.12
 -7 -18 -1 0.16 0.08
 7 -18 1 0.24 0.09
 -7 18 -1 0.16 0.09
 -7 18 -1 0.2 0.11
 7 18 1 0.25 0.06
 7 18 1 0.15 0.06
 7 18 1 0.23 0.08
 7 18 1 0.2 0.1
 7 18 1 0.13 0.06
 7 18 1 0.14 0.09
 -8 -18 -1 0.15 0.09
 -8 -18 -1 0.25 0.13
 8 -18 1 0.07 0.09
 -8 -18 -1 0.16 0.09
 -8 -18 -1 0.09 0.09
 8 -18 1 0.2 0.12
 8 -18 1 -0.12 0.1
 8 -18 1 0.06 0.09
 -8 -18 -1 0.12 0.1
 8 18 1 0.13 0.06
 8 18 1 0.18 0.11
 -8 18 -1 0.1 0.1
 8 18 1 0.28 0.08
 8 18 1 0.12 0.05
 8 18 1 0.11 0.1
 -8 18 -1 0.19 0.09
 8 18 1 0.17 0.06
 9 -18 1 0.33 0.1
 9 -18 1 0.39 0.1
 9 -18 1 0.25 0.14
 9 -18 1 0.37 0.12
 -9 -18 -1 0.23 0.13
 -9 -18 -1 0.29 0.12
 -9 -18 -1 0.24 0.1
 9 -18 1 0.47 0.15
 9 18 1 0.27 0.08
 -9 18 -1 0.31 0.12
 9 18 1 0.27 0.07
 9 18 1 0.41 0.11
 -9 18 -1 0.4 0.11
 9 18 1 0.41 0.13
 -9 18 -1 0.29 0.13
 10 -18 1 1.43 0.23
 -10 -18 -1 1.81 0.18
 -10 -18 -1 1.8 0.24
 10 -18 1 1.89 0.2
 10 -18 1 1.65 0.26
 10 -18 1 1.99 0.26
 -10 -18 -1 1.87 0.22
 10 18 1 1.89 0.22
 10 18 1 1.7 0.23
 -10 18 -1 1.69 0.25
 10 18 1 1.87 0.15
 -10 18 -1 1.63 0.21
 10 18 1 1.88 0.14
 11 -18 1 0.17 0.14
 -11 -18 -1 0.31 0.15
 11 -18 1 0.38 0.17
 -11 -18 -1 0.3 0.12
 -11 -18 -1 0.35 0.15
 11 -18 1 0.14 0.11
 -11 -18 -1 0.16 0.1
 11 -18 1 0.37 0.12
 11 18 1 0.29 0.06
 11 18 1 0.4 0.16
 11 18 1 0.29 0.13
 -11 18 -1 0.37 0.12
 -11 18 -1 0.04 0.14
 11 18 1 0.35 0.07
 -11 18 -1 0.43 0.15
 12 -18 1 0.09 0.12
 12 -18 1 0.1 0.11
 -12 -18 -1 0.09 0.15
 12 18 1 -0.01 0.13
 -12 18 -1 -0.1 0.12
 -12 18 -1 0.19 0.15
 13 -18 1 0.35 0.13
 13 -18 1 0.33 0.12
 -13 -18 -1 0.36 0.19
 -13 18 -1 0.29 0.15
 -13 18 -1 0.24 0.17
 13 18 1 0.35 0.15
 14 -19 -1 -0.13 0.11
 -14 -19 1 -0.01 0.19
 14 -19 -1 0.02 0.14
 -14 19 1 -0.11 0.18
 -14 19 1 0.33 0.18
 13 -19 -1 0.01 0.11
 13 -19 -1 -0.32 0.12
 -13 -19 1 0.2 0.16
 -13 19 1 -0.16 0.15
 -13 19 1 0.05 0.15
 -12 -19 1 -0.07 0.17
 12 -19 -1 -0.18 0.11
 12 -19 -1 0.15 0.11
 -12 19 1 -0.08 0.14
 12 19 -1 0.1 0.14
 -12 19 1 -0.06 0.14
 -11 -19 1 -0.02 0.1
 11 -19 -1 -0.11 0.1
 -11 -19 1 0.01 0.08
 -11 -19 1 -0.16 0.14
 11 -19 -1 0 0.16
 11 -19 -1 0.04 0.16
 11 -19 -1 -0.18 0.11
 -11 19 1 -0.16 0.13
 -11 19 1 0.07 0.12
 -11 19 1 0 0.16
 -11 19 1 0.09 0.13
 -10 -19 1 0.54 0.1
 10 -19 -1 1.04 0.22
 -10 -19 1 0.71 0.15
 -10 -19 1 0.73 0.17
 10 -19 -1 0.82 0.16
 -10 -19 1 0.64 0.11
 10 -19 -1 0.41 0.15
 10 19 -1 0.71 0.1
 10 19 -1 0.59 0.08
 -10 19 1 0.37 0.13
 -10 19 1 0.81 0.17
 -10 19 1 0.98 0.17
 -10 19 1 0.67 0.13
 10 19 -1 0.78 0.14
 -9 -19 1 1.29 0.15
 -9 -19 1 1.43 0.17
 -9 -19 1 0.84 0.19
 -9 -19 1 1.13 0.21
 9 -19 -1 1.26 0.21
 9 -19 -1 1.36 0.17
 9 -19 -1 1.06 0.18
 -9 -19 1 1.09 0.17
 9 -19 -1 1.34 0.23
 9 -19 -1 0.99 0.22
 9 19 -1 1.35 0.2
 9 19 -1 1.17 0.11
 9 19 -1 1.36 0.13
 -9 19 1 0.9 0.2
 -9 19 1 1.17 0.2
 -9 19 1 1.45 0.16
 9 19 -1 1.08 0.19
 8 -19 -1 0.04 0.1
 8 -19 -1 0.12 0.13
 8 -19 -1 0 0.11
 -8 -19 1 0.03 0.08
 -8 -19 1 0.04 0.08
 -8 -19 1 0.1 0.08
 -8 -19 1 -0.02 0.1
 8 -19 -1 0.12 0.12
 -8 -19 1 -0.01 0.11
 8 -19 -1 -0.09 0.09
 8 19 -1 -0.01 0.11
 -8 19 1 -0.04 0.1
 -8 19 1 0.05 0.1
 8 19 -1 0.09 0.05
 8 19 -1 0.06 0.04
 8 19 -1 0.08 0.11
 8 19 -1 0.16 0.06
 -8 19 1 -0.01 0.1
 -8 19 1 0.07 0.12
 -7 -19 1 0.02 0.07
 -7 -19 1 0.11 0.08
 -7 -19 1 0.01 0.09
 -7 -19 1 -0.02 0.1
 -7 -19 1 0.1 0.08
 7 -19 -1 0.01 0.08
 7 -19 -1 0.15 0.12
 7 -19 -1 -0.01 0.08
 7 -19 -1 -0.01 0.09
 -7 19 1 0.08 0.11
 7 19 -1 -0.08 0.09
 7 19 -1 0.11 0.07
 7 19 -1 0.06 0.1
 -7 19 1 -0.12 0.09
 -7 19 1 0.06 0.09
 7 19 -1 0 0.06
 7 19 -1 0 0.06
 7 19 -1 -0.04 0.06
 6 -19 -1 3.77 0.28
 6 -19 -1 3.71 0.29
 -6 -19 1 4.05 0.29
 -6 -19 1 4.29 0.29
 6 -19 -1 3.74 0.28
 6 -19 -1 4.21 0.3
 -6 -19 1 4.13 0.3
 -6 -19 1 3.84 0.3
 6 19 -1 4.35 0.27
 6 19 -1 4.44 0.28
 6 19 -1 4.14 0.29
 -6 19 1 3.85 0.29
 -6 19 1 3.66 0.28
 6 19 -1 4.25 0.29
 -6 19 1 3.54 0.27
 -5 -19 1 1.18 0.14
 5 -19 -1 0.92 0.15
 -5 -19 1 1.05 0.11
 5 -19 -1 1.21 0.16
 5 -19 -1 1.21 0.17
 -5 -19 1 1.1 0.13
 5 -19 -1 0.93 0.15
 -5 -19 1 1.11 0.14
 5 -19 -1 1.34 0.13
 5 19 -1 1.3 0.13
 -5 19 1 1.03 0.16
 5 19 -1 1.49 0.14
 -5 19 1 0.8 0.15
 -5 19 1 1.16 0.16
 -5 19 1 1.16 0.14
 5 19 -1 1.14 0.13
 -5 19 1 1.08 0.13
 5 19 -1 1.23 0.12
 5 19 -1 1.47 0.17
 -4 -19 1 0.32 0.08
 -4 -19 1 0.15 0.07
 4 -19 -1 0.31 0.07
 -4 -19 1 0.32 0.09
 -4 -19 1 0.14 0.06
 -4 -19 1 0.49 0.09
 -4 -19 1 0.55 0.12
 4 -19 -1 0.26 0.09
 4 -19 -1 0.23 0.09
 4 -19 -1 0.23 0.1
 4 -19 -1 0.21 0.08
 4 19 -1 0.61 0.12
 4 19 -1 0.35 0.07
 4 19 -1 0.3 0.06
 4 19 -1 0.39 0.1
 -4 19 1 0.23 0.08
 -4 19 1 0.32 0.09
 -4 19 1 0.29 0.1
 -4 19 1 0.16 0.06
 4 19 -1 0.35 0.08
 -4 19 1 0.26 0.09
 -3 -19 1 3.34 0.25
 3 -19 -1 2.83 0.24
 -3 -19 1 3.2 0.21
 3 -19 -1 3.05 0.25
 3 -19 -1 3.56 0.23
 -3 -19 1 3.45 0.23
 3 -19 -1 3 0.24
 -3 -19 1 3.33 0.23
 3 -19 -1 3.46 0.24
 -3 -19 1 2.73 0.22
 3 19 -1 3.12 0.24
 -3 19 1 3.38 0.24
 -3 19 1 2.81 0.24
 3 19 -1 3.45 0.22
 -3 19 1 2.83 0.24
 -3 19 1 2.96 0.23
 3 19 -1 3.43 0.25
 -3 19 1 2.97 0.24
 3 19 -1 3.07 0.23
 -2 -19 1 0.67 0.13
 -2 -19 1 0.33 0.08
 -2 -19 1 0.38 0.09
 2 -19 -1 0.77 0.11
 2 -19 -1 0.43 0.09
 -2 -19 1 0.44 0.09
 -2 -19 1 0.48 0.12
 2 -19 -1 0.71 0.12
 2 -19 -1 0.88 0.14
 -2 19 1 0.66 0.11
 -2 19 1 0.6 0.11
 2 19 -1 0.58 0.1
 -2 19 1 0.62 0.1
 2 19 -1 0.75 0.11
 2 19 -1 0.49 0.12
 -2 19 1 0.66 0.12
 2 19 -1 0.49 0.11
 2 19 -1 0.42 0.09
 -2 19 1 0.8 0.12
 1 -19 -1 2.64 0.19
 1 -19 -1 2.48 0.2
 -1 -19 1 2.44 0.19
 -1 -19 1 2.68 0.21
 -1 -19 1 2.54 0.2
 1 -19 -1 2.64 0.19
 -1 -19 1 2.3 0.18
 -1 -19 1 2.37 0.19
 1 -19 -1 2.84 0.22
 1 19 -1 2.6 0.2
 1 19 -1 2.43 0.2
 1 19 -1 2.75 0.2
 1 19 -1 2.67 0.2
 -1 19 1 2.47 0.21
 -1 19 1 2.53 0.2
 -1 19 1 2.45 0.21
 -1 19 1 2.34 0.19
 -1 19 1 2.39 0.19
 1 19 -1 2.29 0.19
 0 -19 1 0.28 0.08
 0 -19 -1 0.46 0.11
 0 -19 -1 0.32 0.09
 0 -19 1 0.14 0.07
 0 -19 -1 0.35 0.07
 0 -19 -1 0.35 0.07
 0 -19 1 0.47 0.09
 0 19 -1 0.52 0.11
 0 19 1 0.39 0.08
 0 19 1 0.4 0.08
 0 19 1 0.49 0.1
 0 19 -1 0.29 0.07
 0 19 -1 0.25 0.08
 0 19 -1 0.3 0.08
 0 19 1 0.56 0.12
 1 -19 1 1.61 0.17
 1 -19 1 1.24 0.13
 -1 -19 -1 1.69 0.15
 -1 -19 -1 1.7 0.15
 -1 -19 -1 1.54 0.17
 1 -19 1 1.67 0.17
 1 -19 1 1.47 0.14
 -1 19 -1 1.49 0.16
 1 19 1 1.65 0.15
 -1 19 -1 1.28 0.15
 1 19 1 1.61 0.15
 -1 19 -1 1.54 0.14
 -1 19 -1 1.34 0.16
 1 19 1 1.94 0.16
 -1 19 -1 1.41 0.15
 1 19 1 1.8 0.16
 1 19 1 1.61 0.16
 -2 -19 -1 0.3 0.07
 -2 -19 -1 0.55 0.1
 2 -19 1 0.26 0.07
 2 -19 1 0.27 0.07
 -2 -19 -1 0.38 0.09
 2 -19 1 0.34 0.09
 2 -19 1 0.53 0.1
 2 -19 1 0.58 0.13
 -2 -19 -1 0.28 0.08
 -2 19 -1 0.35 0.08
 2 19 1 0.36 0.08
 -2 19 -1 0.36 0.09
 -2 19 -1 0.37 0.09
 -2 19 -1 0.41 0.09
 2 19 1 0.26 0.08
 2 19 1 0.32 0.08
 -2 19 -1 0.6 0.13
 2 19 1 0.37 0.08
 2 19 1 0.4 0.09
 -3 -19 -1 0.74 0.1
 -3 -19 -1 0.53 0.12
 3 -19 1 0.61 0.1
 3 -19 1 0.51 0.1
 3 -19 1 0.55 0.13
 -3 -19 -1 0.47 0.11
 3 -19 1 0.78 0.12
 -3 -19 -1 0.78 0.1
 -3 -19 -1 0.51 0.09
 3 -19 1 0.46 0.11
 -3 -19 -1 0.56 0.13
 3 19 1 0.48 0.09
 3 19 1 0.6 0.1
 -3 19 -1 0.65 0.12
 -3 19 -1 0.61 0.11
 -3 19 -1 0.51 0.1
 3 19 1 0.7 0.13
 -3 19 -1 0.4 0.09
 -3 19 -1 0.55 0.12
 3 19 1 0.77 0.11
 3 19 1 0.58 0.13
 -4 -19 -1 0.63 0.1
 4 -19 1 0.2 0.08
 -4 -19 -1 0.38 0.09
 -4 -19 -1 0.38 0.09
 -4 -19 -1 0.68 0.12
 4 -19 1 0.4 0.1
 -4 -19 -1 0.62 0.11
 4 -19 1 0.37 0.09
 -4 -19 -1 0.72 0.13
 4 -19 1 0.47 0.11
 4 19 1 0.67 0.12
 -4 19 -1 0.3 0.09
 -4 19 -1 0.38 0.09
 -4 19 -1 0.38 0.1
 -4 19 -1 0.48 0.1
 4 19 1 0.53 0.08
 4 19 1 0.59 0.12
 4 19 1 0.53 0.09
 -5 -19 -1 0.15 0.1
 -5 -19 -1 0.1 0.08
 5 -19 1 0.27 0.08
 5 -19 1 0.19 0.08
 5 -19 1 0.36 0.1
 5 -19 1 0.09 0.08
 -5 -19 -1 0.14 0.07
 5 -19 1 0.17 0.11
 -5 -19 -1 0.03 0.08
 5 19 1 0.13 0.09
 5 19 1 0.1 0.07
 -5 19 -1 0.2 0.07
 -5 19 -1 0.24 0.08
 5 19 1 0.15 0.07
 5 19 1 0.2 0.07
 -5 19 -1 0.07 0.09
 5 19 1 0.19 0.08
 -5 19 -1 0.18 0.1
 -6 -19 -1 0.41 0.09
 -6 -19 -1 0.36 0.09
 6 -19 1 0.26 0.08
 6 -19 1 0.33 0.1
 6 -19 1 0.11 0.09
 6 -19 1 0.31 0.13
 -6 -19 -1 0.33 0.08
 -6 -19 -1 0.37 0.11
 6 -19 1 0.45 0.11
 6 19 1 0.37 0.09
 -6 19 -1 0.29 0.11
 6 19 1 0.43 0.07
 6 19 1 0.33 0.08
 -6 19 -1 0.25 0.09
 6 19 1 0.57 0.11
 6 19 1 0.18 0.1
 -6 19 -1 0.27 0.1
 6 19 1 0.37 0.1
 -7 -19 -1 0.03 0.09
 -7 -19 -1 0.17 0.1
 7 -19 1 0.19 0.12
 7 -19 1 0.14 0.1
 7 -19 1 0.16 0.1
 -7 -19 -1 0.03 0.12
 -7 -19 -1 0.1 0.08
 7 -19 1 0.02 0.08
 7 -19 1 0.1 0.13
 -7 -19 -1 0.02 0.11
 7 19 1 0.09 0.07
 7 19 1 0.13 0.06
 7 19 1 -0.01 0.1
 -7 19 -1 0.03 0.09
 7 19 1 0.21 0.08
 7 19 1 0.12 0.1
 7 19 1 0.09 0.06
 -7 19 -1 0 0.1
 8 -19 1 -0.03 0.13
 8 -19 1 0.01 0.12
 -8 -19 -1 0 0.1
 -8 -19 -1 0.05 0.09
 8 -19 1 0.09 0.1
 8 -19 1 -0.17 0.09
 -8 -19 -1 0.07 0.11
 8 -19 1 -0.12 0.11
 -8 -19 -1 -0.01 0.13
 8 19 1 -0.04 0.05
 8 19 1 0.08 0.06
 8 19 1 0.02 0.06
 -8 19 -1 -0.11 0.11
 8 19 1 -0.02 0.1
 8 19 1 -0.02 0.12
 -8 19 -1 -0.02 0.09
 8 19 1 0.13 0.08
 9 -19 1 0.29 0.13
 -9 -19 -1 0.64 0.15
 9 -19 1 0.39 0.15
 -9 -19 -1 0.4 0.11
 -9 -19 -1 0.45 0.13
 9 19 1 0.38 0.14
 9 19 1 0.41 0.12
 9 19 1 0.54 0.12
 -9 19 -1 0.4 0.13
 -9 19 -1 0.49 0.14
 9 19 1 0.43 0.07
 9 19 1 0.45 0.1
 9 19 1 0.33 0.08
 -9 19 -1 0.47 0.12
 -10 -19 -1 -0.09 0.11
 10 -19 1 -0.15 0.16
 -10 -19 -1 0.03 0.13
 10 -19 1 0.01 0.15
 10 -19 1 0.09 0.11
 10 -19 1 0.07 0.14
 10 -19 1 0.1 0.1
 -10 -19 -1 -0.01 0.1
 -10 -19 -1 0.2 0.14
 10 19 1 0.04 0.12
 -10 19 -1 0.11 0.12
 10 19 1 0.11 0.08
 10 19 1 0.06 0.15
 -10 19 -1 0 0.11
 10 19 1 0.01 0.06
 -10 19 -1 0.14 0.13
 -11 -19 -1 0.32 0.16
 11 -19 1 0.27 0.12
 11 -19 1 0.29 0.15
 11 -19 1 0.42 0.18
 -11 -19 -1 0.3 0.15
 11 -19 1 0.4 0.12
 11 19 1 0.21 0.17
 -11 19 -1 0.17 0.15
 -11 19 -1 0.31 0.12
 -11 19 -1 0.14 0.19
 11 19 1 0.2 0.13
 11 19 1 0.13 0.07
 -11 19 -1 0.12 0.13
 12 -19 1 -0.05 0.11
 12 -19 1 0.01 0.11
 -12 -19 -1 0.01 0.17
 12 19 1 0.08 0.14
 -12 19 -1 0.16 0.14
 -12 19 -1 -0.06 0.13
 -12 19 -1 0.1 0.15
 13 -19 1 0.56 0.13
 -13 -19 -1 0.81 0.22
 13 -19 1 0.71 0.14
 -13 19 -1 0.36 0.18
 13 19 1 0.41 0.16
 -13 19 -1 0.93 0.2
 -13 -20 1 0.39 0.18
 13 -20 -1 -0.06 0.14
 13 -20 -1 0.08 0.12
 -13 20 1 0.28 0.15
 -13 20 1 0.07 0.16
 -13 20 1 0.41 0.15
 12 -20 -1 -0.09 0.12
 12 -20 -1 0.01 0.11
 -12 -20 1 -0.06 0.17
 -12 20 1 -0.03 0.12
 -12 20 1 -0.27 0.15
 -11 -20 1 0.3 0.15
 11 -20 -1 -0.11 0.11
 11 -20 -1 0.11 0.16
 -11 -20 1 -0.03 0.1
 11 -20 -1 -0.09 0.11
 -11 20 1 -0.16 0.13
 -11 20 1 -0.09 0.12
 -11 20 1 0.01 0.17
 11 20 -1 0.24 0.14
 11 20 -1 0.12 0.05
 11 20 -1 0.08 0.05
 -10 -20 1 0.04 0.1
 10 -20 -1 0.02 0.1
 -10 -20 1 0.05 0.11
 10 -20 -1 0.2 0.17
 10 -20 -1 0.07 0.15
 -10 -20 1 0.22 0.14
 10 -20 -1 0.14 0.11
 10 20 -1 0.09 0.07
 -10 20 1 -0.1 0.1
 -10 20 1 0.03 0.12
 10 20 -1 0.08 0.05
 -10 20 1 -0.11 0.12
 9 -20 -1 0.1 0.13
 9 -20 -1 0.02 0.15
 -9 -20 1 0.08 0.09
 -9 -20 1 0 0.14
 9 -20 -1 0.03 0.11
 -9 -20 1 0.1 0.1
 9 20 -1 0.15 0.11
 9 20 -1 0.11 0.06
 9 20 -1 0.05 0.07
 -9 20 1 -0.19 0.12
 -9 20 1 -0.13 0.11
 9 20 -1 0.07 0.14
 -9 20 1 0.04 0.12
 -8 -20 1 0.64 0.14
 8 -20 -1 0.41 0.13
 -8 -20 1 0.48 0.1
 8 -20 -1 0.46 0.14
 -8 -20 1 0.6 0.1
 -8 -20 1 0.38 0.1
 8 -20 -1 0.35 0.11
 8 -20 -1 0.43 0.13
 8 -20 -1 0.55 0.12
 8 20 -1 0.5 0.1
 8 20 -1 0.61 0.1
 8 20 -1 0.75 0.17
 -8 20 1 0.65 0.13
 -8 20 1 0.4 0.13
 8 20 -1 0.58 0.09
 -8 20 1 0.3 0.12
 -8 20 1 0.58 0.12
 8 20 -1 0.53 0.13
 7 -20 -1 -0.01 0.1
 -7 -20 1 0.19 0.11
 7 -20 -1 0.18 0.11
 -7 -20 1 0.06 0.09
 7 -20 -1 0.09 0.09
 7 -20 -1 0.15 0.13
 -7 -20 1 0.06 0.08
 -7 -20 1 0.14 0.09
 -7 -20 1 0.19 0.12
 -7 20 1 0.14 0.1
 7 20 -1 0.06 0.11
 -7 20 1 0.18 0.11
 7 20 -1 0.16 0.06
 7 20 -1 0.22 0.08
 7 20 -1 0.05 0.07
 7 20 -1 0.12 0.06
 -7 20 1 -0.14 0.1
 7 20 -1 0.2 0.11
 6 -20 -1 0.08 0.12
 6 -20 -1 0.11 0.1
 6 -20 -1 0.13 0.09
 -6 -20 1 0.19 0.09
 -6 -20 1 0.15 0.09
 6 -20 -1 0.16 0.09
 6 -20 -1 -0.02 0.11
 -6 -20 1 0 0.07
 -6 -20 1 0.15 0.09
 -6 -20 1 0.07 0.09
 6 20 -1 0.18 0.08
 -6 20 1 0.04 0.09
 6 20 -1 0.08 0.06
 6 20 -1 0.21 0.1
 6 20 -1 0.1 0.07
 -6 20 1 0.17 0.09
 6 20 -1 0.05 0.07
 -6 20 1 0.15 0.11
 5 -20 -1 0.57 0.12
 5 -20 -1 0.66 0.13
 5 -20 -1 0.26 0.09
 5 -20 -1 0.49 0.12
 -5 -20 1 0.46 0.09
 -5 -20 1 0.5 0.1
 -5 -20 1 0.42 0.08
 -5 -20 1 0.35 0.08
 5 -20 -1 0.41 0.1
 -5 20 1 0.43 0.1
 -5 20 1 0.36 0.1
 5 20 -1 0.57 0.11
 -5 20 1 0.38 0.1
 5 20 -1 0.6 0.13
 -5 20 1 0.64 0.12
 5 20 -1 0.46 0.11
 5 20 -1 0.42 0.09
 5 20 -1 0.38 0.09
 4 -20 -1 0.64 0.1
 4 -20 -1 0.73 0.11
 -4 -20 1 0.43 0.09
 -4 -20 1 0.48 0.08
 -4 -20 1 0.41 0.09
 4 -20 -1 0.71 0.1
 -4 -20 1 0.63 0.1
 4 -20 -1 0.42 0.11
 4 -20 -1 0.56 0.14
 -4 -20 1 0.26 0.07
 -4 -20 1 0.45 0.09
 -4 20 1 0.44 0.09
 4 20 -1 0.59 0.12
 4 20 -1 0.56 0.11
 -4 20 1 0.48 0.1
 -4 20 1 0.39 0.09
 4 20 -1 0.49 0.1
 -4 20 1 0.53 0.11
 -4 20 1 0.47 0.1
 4 20 -1 0.35 0.09
 -3 -20 1 0.09 0.08
 3 -20 -1 0.17 0.09
 -3 -20 1 0.13 0.06
 3 -20 -1 0.05 0.06
 3 -20 -1 0.18 0.09
 -3 -20 1 0.07 0.05
 -3 -20 1 0.17 0.08
 -3 -20 1 0.16 0.08
 3 -20 -1 0.15 0.09
 3 20 -1 0.11 0.07
 -3 20 1 0.19 0.06
 -3 20 1 0.01 0.08
 3 20 -1 0.2 0.08
 -3 20 1 0.19 0.08
 3 20 -1 0.14 0.08
 -3 20 1 0.09 0.09
 3 20 -1 0.03 0.08
 3 20 -1 0.09 0.06
 -3 20 1 -0.01 0.08
 2 -20 -1 0.08 0.08
 -2 -20 1 0.31 0.09
 2 -20 -1 0.13 0.06
 -2 -20 1 0.01 0.05
 2 -20 -1 0.2 0.09
 2 -20 -1 0.05 0.06
 2 -20 -1 0.1 0.08
 -2 -20 1 0.07 0.05
 -2 -20 1 0.21 0.08
 -2 -20 1 -0.03 0.06
 -2 20 1 0.1 0.07
 -2 20 1 0.18 0.08
 2 20 -1 0.09 0.08
 2 20 -1 0.21 0.08
 -2 20 1 0.13 0.08
 2 20 -1 0.06 0.07
 -2 20 1 0.16 0.1
 -2 20 1 0.1 0.08
 2 20 -1 0.11 0.07
 2 20 -1 0.16 0.08
 -1 -20 1 0.51 0.1
 -1 -20 1 0.59 0.11
 1 -20 -1 0.82 0.14
 1 -20 -1 0.64 0.12
 1 -20 -1 0.76 0.11
 1 -20 -1 0.78 0.11
 1 -20 -1 0.65 0.13
 -1 -20 1 0.49 0.1
 -1 -20 1 0.64 0.13
 -1 20 1 0.57 0.12
 -1 20 1 0.84 0.13
 -1 20 1 0.65 0.11
 -1 20 1 0.65 0.12
 1 20 -1 0.6 0.12
 1 20 -1 0.85 0.12
 1 20 -1 0.6 0.14
 -1 20 1 0.53 0.1
 1 20 -1 0.63 0.11
 1 20 -1 0.6 0.13
 0 -20 1 0.01 0.06
 0 -20 -1 -0.08 0.08
 0 -20 -1 -0.05 0.06
 0 -20 -1 0.05 0.06
 0 -20 1 -0.01 0.09
 0 -20 -1 0.05 0.07
 0 -20 1 -0.11 0.06
 0 -20 1 0.09 0.08
 0 -20 1 0.06 0.07
 0 20 1 0.09 0.09
 0 20 -1 0.02 0.08
 0 20 1 -0.11 0.07
 0 20 -1 -0.04 0.09
 0 20 -1 0.01 0.07
 0 20 1 -0.01 0.07
 0 20 -1 -0.1 0.07
 0 20 1 0.05 0.08
 0 20 1 0.07 0.08
 0 20 -1 -0.12 0.08
 1 -20 1 0.23 0.1
 1 -20 1 0.15 0.08
 -1 -20 -1 0.04 0.07
 -1 -20 -1 0.14 0.07
 1 -20 1 0.09 0.08
 1 -20 1 0.03 0.06
 1 -20 1 0.07 0.06
 -1 -20 -1 0.12 0.06
 -1 -20 -1 -0.07 0.08
[truncated: 2,666,315 more chars]
